# Supplementary material
Source: Royal Society of Chemistry journal article supplement (doi:10.1039/d6cp01100d)
Supplement: d6cp01100d1.pdf [file d6cp01100d1.pdf]

*Supporting Information*

**A Computational Study of NHC-Catalyzed [3 + 3] annulation of enals with  
pyrazol-5-amines: Mechanism, Regio- and Stereoselectivities**

**Yan Li\*, Chao Zhao, Zhiqiang Zhang**

*School of Chemical Engineering, University of Science and Technology Liaoning,*

*Anshan 114051, P. R. China*

***Corresponding person: Yan Li***

***E-mail: snow2007liyan@163.com***

***Telephone: +86-18741219506***

***Fax: 86-412-5929627***

## Contents:

|                                                                  |     |
|------------------------------------------------------------------|-----|
| 1. Computational Details .....                                   | S2  |
| 2. Test calculations of stereoselective transition states .....  | S3  |
| 3. Generation of the active NHC.....                             | S4  |
| 4. Generation of R2.....                                         | S5  |
| 5. Other Possible Reaction Pathways .....                        | S6  |
| 6. Conformational Search .....                                   | S11 |
| 7. RR/RS/SS-Configurational Reaction Pathways.....               | S12 |
| 8. Transformation Pathways of 1,2-Addition Intermediate.....     | S13 |
| 9. Possible Reaction Pathways for the Transformation of M3. .... | S14 |
| 10. Reaction Pathways for the Transformation of M4SR→M6S. ....   | S15 |
| 11. Cartesian coordinates of all the stationary points .....     | S17 |

## 1. Computational Details:

### (1) Calculation of enantiomeric excess (ee)

The extent of enantioselectivity, in terms of enantiomeric excess (ee %), was calculated by using the Boltzmann distribution of diastereomeric transition states with the following equations:

$$\frac{[R]}{[S]} = \frac{\exp(-\Delta G_{[R]}^\ddagger/RT)}{\exp(-\Delta G_{[S]}^\ddagger/RT)} = \exp(\Delta\Delta G^\ddagger / RT) \quad (1)$$

$$ee = \frac{[R] - [S]}{[R] + [S]} \times 100\% = \frac{\frac{[R]}{[S]} - 1}{\frac{[R]}{[S]} + 1} \times 100\% \quad (2)$$

Where  $\Delta G^\ddagger$  is the Gibbs free energy barrier of the competing diastereomeric transition state and  $\Delta\Delta G^\ddagger$  is the Gibbs free energy difference between the two diastereomeric transition states.

### (2) Global reactivity indexes (GRI) analysis

In global reactivity index (GRI) analysis, the electrophilicity index  $\omega$  which reflects the molecular global electrophilicity character can be measured with the expression  $\omega = (\mu^2/2\eta)$  (eV), where  $\mu$  is the electronic chemical potential and  $\eta$  is the chemical hardness. The values of  $\mu$  and  $\eta$  can be determined in terms of the one-electron energy of HOMO and LUMO ( $E_{\text{HOMO}}$  and  $E_{\text{LUMO}}$ ) using  $\mu \approx (E_{\text{HOMO}} + E_{\text{LUMO}})/2$  and  $\eta \approx (E_{\text{LUMO}} - E_{\text{HOMO}})$ . Within the Kohn–Sham scheme, the molecular nucleophilicity character is reflected by the value of the nucleophilicity index  $N$  as defined in  $N = E_{\text{HOMO}}(\text{Nu}) - E_{\text{LUMO}}(\text{TCE})$ , where  $E_{\text{LUMO}}(\text{TCE})$  is the LUMO energy of tetracyanoethylene (TCE).

## 2. Test calculations of stereoselective transition states.

**Table S1.** Different computational levels.

| Level     | Functional      | Basis set         | Solvent model |
|-----------|-----------------|-------------------|---------------|
| <b>L1</b> | M06-2X-D3       | 6-311++G(2df,2pd) | IEFPCM        |
| <b>L2</b> | $\omega$ B97X-D | 6-311++G(2df,2pd) | IEFPCM        |
| <b>L3</b> | M06-2X-D3       | 6-311++G(2df,2pd) | SMD           |
| <b>L4</b> | M06-2X-D3       | def2-TZVP         | IEFPCM        |
| <b>L5</b> | M06-2X-D3       | def2-QZVP         | IEFPCM        |

**Table S2.** Comparison of relative energies for stereoselective transition states at different levels. Energies are given in kcal/mol.

| species      | L1  | L2  | L3  | L4  | L5  |
|--------------|-----|-----|-----|-----|-----|
| <b>TS4RR</b> | 2.6 | 3.5 | 2.6 | 3.4 | 3.4 |
| <b>TS4SR</b> | 0.0 | 0.0 | 0.0 | 0.0 | 0.0 |

It should be noted that only the transition state associated with the most feasible pathway towards R- and S-configurational product were considered. In addition, the single-point energies of L1/L3/L4/L5 were based on the geometries optimized at IEF-PCM(THF)M06-2X/6-31G(d,p) level, and the single-point energies of L2 were based on the geometries optimized at IEF-PCM(THF) $\omega$ B97X-D/6-31G(d,p) level.

### 3. Generation of the active NHC.

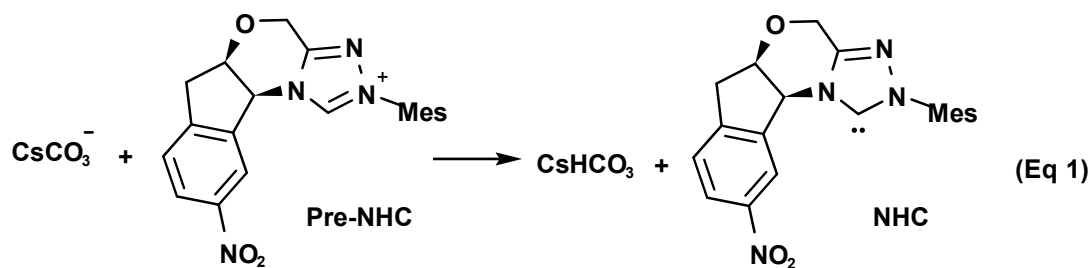

The deprotonation of **Pre-NHC** by  $\text{CsCO}_3^-$  (derived from  $\text{Cs}_2\text{CO}_3$ ) generates the active **NHC** (Eq 1). However, we can not locate the transition state despite of lots of attempts. We scanned the changes of C–H bond. Fig. S1 shows that with the aid of  $\text{CsCO}_3^-$ , formation of the active catalyst **NHC** is barrierless.

**Fig. S1** The deprotonation of NHC precursor by base  $\text{CsCO}_3^-$ . Bond distances are in Å.

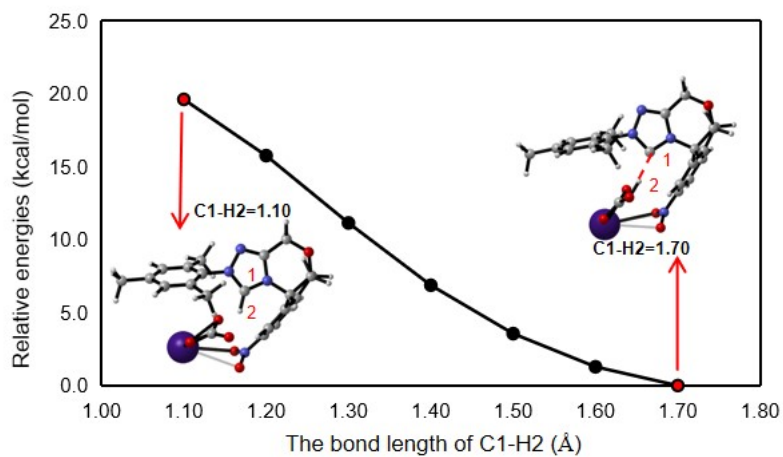

#### 4. Generation of R2.

The **Pre-R2** was deprotonated by the base ( $\text{CsCO}_3^-$ ) to generate the real reactant **R2**. However, we cannot locate the transition state despite lots of attempts. We scanned the changes of N–H bond. Fig.S2 shows that this process has no energy barrier.

**Fig. S2** The deprotonation of Pre-R2 by base ( $\text{CsCO}_3^-$ ) generating R2. Distances in Å.

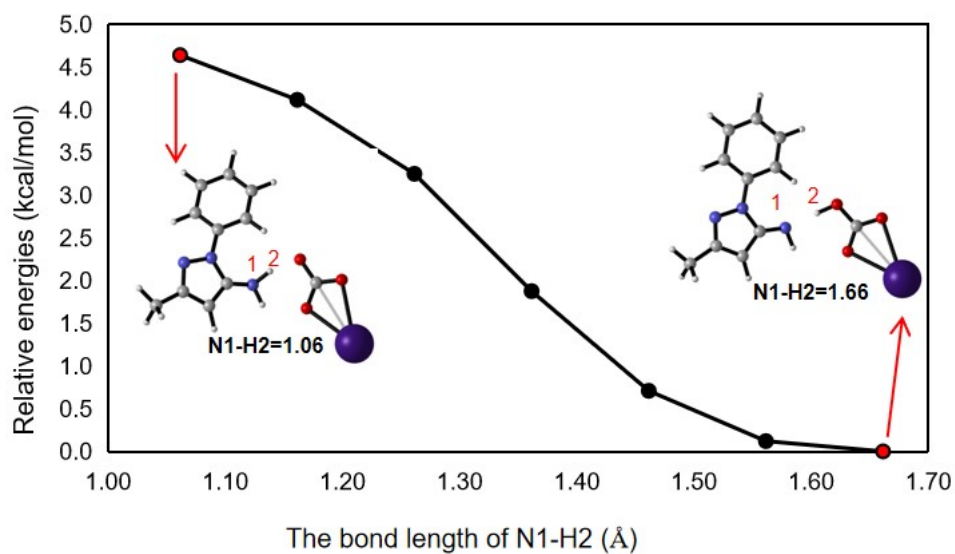

## 5. Other Possible Reaction Pathways.

**Fig. S3** Free energy (kcal/mol) profile of steps 1 and 2. Energies are in kcal/mol.

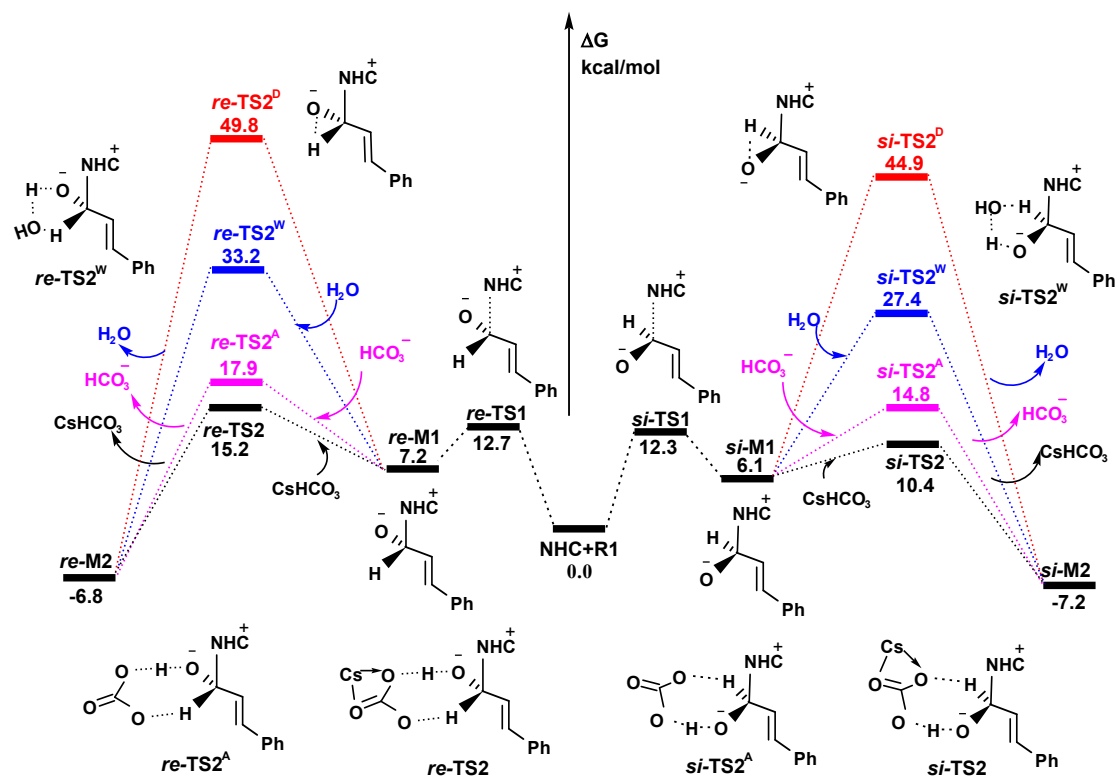

**Fig. S4 (a)** Optimized geometries of key transition states (distance in Å).

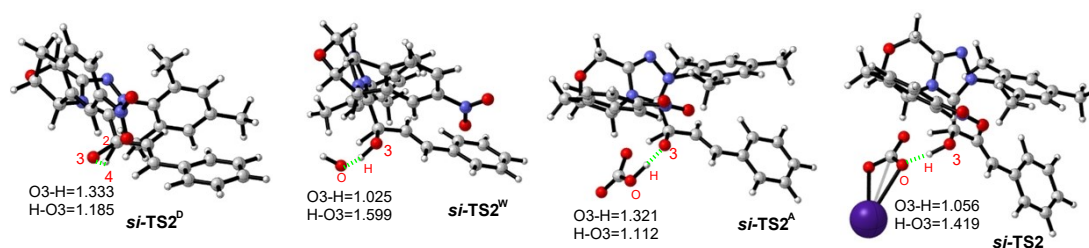

**Fig. S4 (b)** NCI and AIM analyses for *si-TS2<sup>A</sup>* and *si-TS2*. The values in parentheses are distances, Laplacian of electron densities ( $\nabla^2\rho$ ) and electron densities ( $\rho_{\text{bcp}}$ ), which are given in Å,  $10^{-1}$  a.u. and  $10^{-1}$  a.u., respectively.

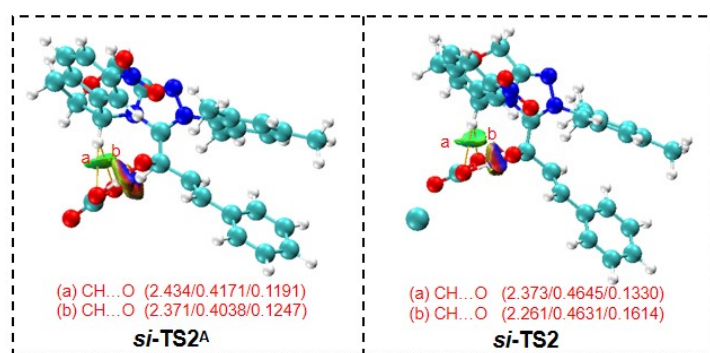

To better understand how  $\text{CsHCO}_3$  facilitates proton transfer, we examined the transition states of the direct, water,  $\text{HCO}_3^-$  and  $\text{CsHCO}_3$  mediated proton transfer mechanisms. As shown in Fig.S4a, *si-TS2<sup>D</sup>* features a three-membered ring, and the significant strain account for its high energy barrier. For *si-TS2<sup>W</sup>*, *si-TS2<sup>A</sup>*, and *si-TS2*, each structure exhibits an hydrogen bond  $\text{O3-H}\cdots\text{O}$ . The O3-H and H-O distances are 1.025/1.599 Å in *si-TS2<sup>W</sup>*, 1.321/1.112 Å in *si-TS2<sup>A</sup>*, 1.056/1.419 Å in *si-TS2*. The O3-H-O angles are 143.48, 176.68 and 172.84° in *si-TS2<sup>W</sup>*, *si-TS2<sup>A</sup>*, and *si-TS2*, respectively. This result indicates that the hydrogen bond in *si-TS2<sup>W</sup>* is weaker than those in *si-TS2<sup>A</sup>* and *si-TS2*, while the hydrogen bond in *si-TS2<sup>A</sup>* and *si-TS2* are comparable. Moreover, NCI and AIM analyses (Fig. S4b) revealed stronger interactions in *si-TS2* than in *si-TS2<sup>A</sup>*. Taken together, the stronger hydrogen bond interactions should be the main reason for the lower energy of *si-TS2* compared to *si-TS2<sup>D</sup>*, *si-TS2<sup>W</sup>* and *si-TS2<sup>A</sup>*.

### Scheme S1 Possible Oxidation Pathways.

In addition to the HTO pathway (Fig. 1), we also investigated the hydride transfer to the carbon (HTC), hydrogen atom transfer–single electron transfer (HAT–SET) and single electron transfer–hydrogen atom transfer (SET–HAT) pathways (Scheme S1). The calculated energy barriers for HTC, HAT-SET and SET-HAT mechanisms are 14.5, 10.0 and 6.3 kcal/mol, respectively, which are higher the 3.2 kcal/mol for HTO pathway. Obviously, the most energetically favored oxidation pathway is the HTO pathway via **TS3**.

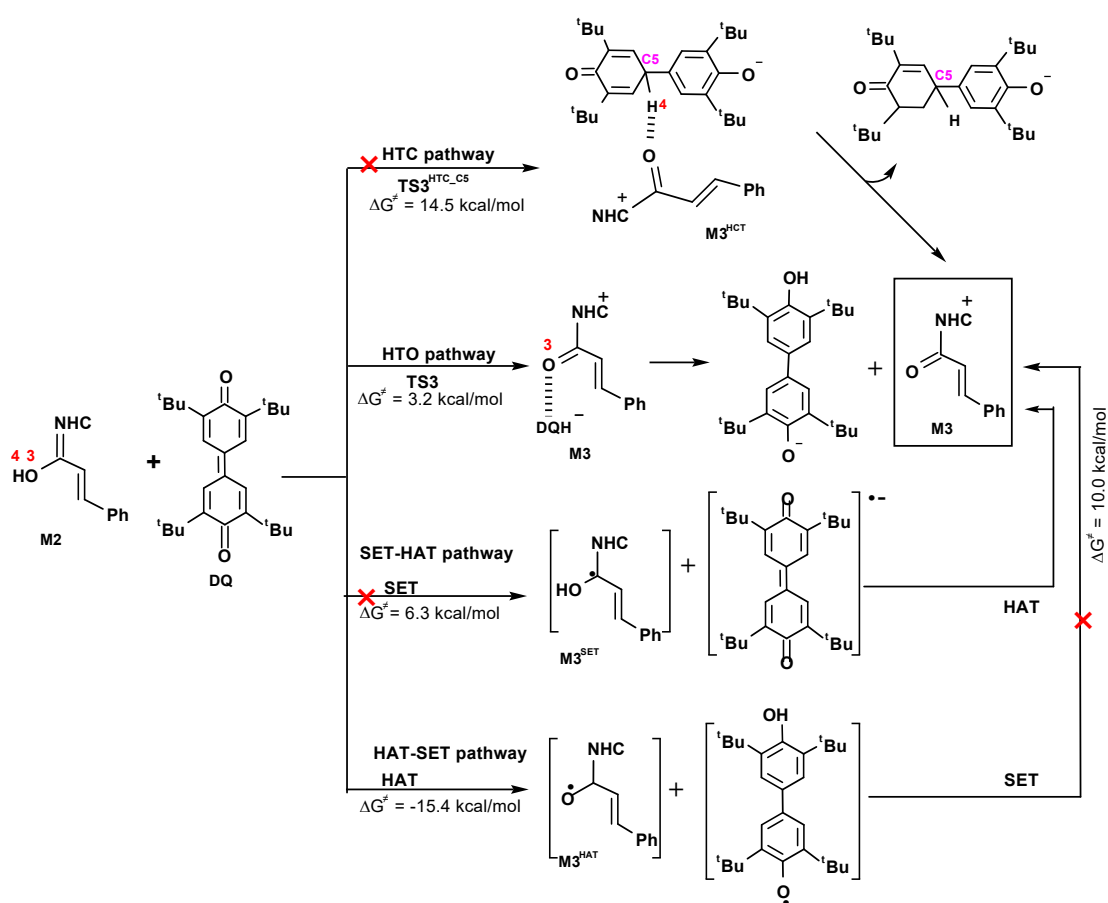

## Scheme S2 Possible HTC Reaction Pathways.

As presented in Scheme S2, four possible HTC pathways corresponding to the hydride H4 transfers from the O3 atom to four different types of carbon atoms (C2, C3, C4 and C5) of DQ have been investigated. The energy barriers are calculated to be 26.5 ( $\text{TS3}^{\text{HTC-C2}}$ ), 17.7 ( $\text{TS3}^{\text{HTC-C3}}$ ), 21.8 ( $\text{TS3}^{\text{HTC-C4}}$ ) and 14.5 ( $\text{TS3}^{\text{HTC-C5}}$ ), which are much higher than the HTO pathway ( $\text{TS3}$ , 3.2 kcal/mol). Therefore, the HTC pathways can be ruled out.

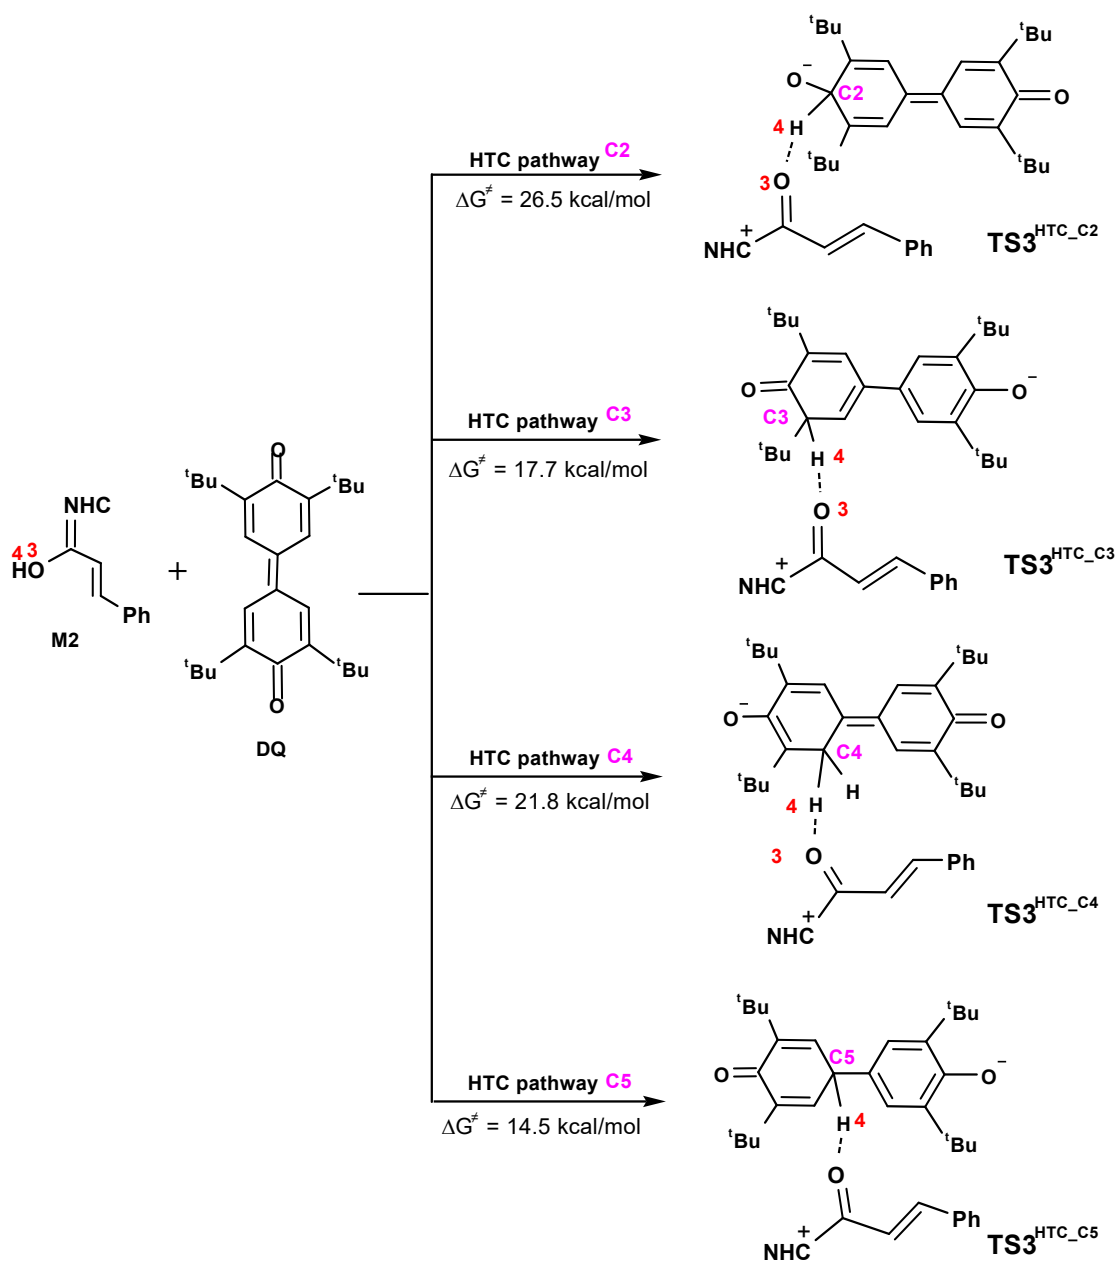

**Fig. S5** Free energy profile for 1,2-addition mechanism. Energies and bond distances are in kcal/mol and Å, respectively.

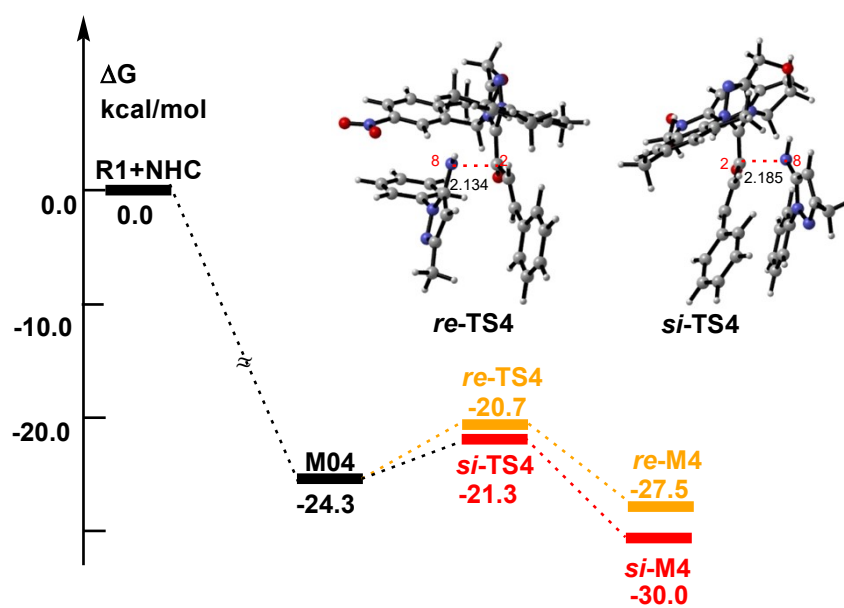

## 6. Conformational Search.

Table S3. Energies of different conformations of TS4s.

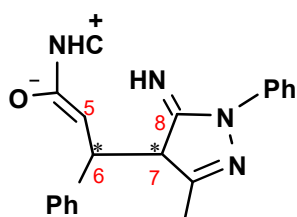

TS4

| species  | Dihedral angle<br>C5-C6-C7-C8 | Free energies<br>(a.u.) | Relative energies<br>(kcal/mol) |
|----------|-------------------------------|-------------------------|---------------------------------|
| TS4RR    | 23.86                         | -2229.749814            | 2.6                             |
| TS4RR'   | -6.81                         | -2229.747016            | 4.3                             |
| TS4RR''  | -93.48                        | -2229.749184            | 3.0                             |
| TS4RR''' | 170.65                        | -2229.734722            | 12.0                            |
| TS4RS    | -48.65                        | -2229.749034            | 3.1                             |
| TS4RS'   | -158.93                       | -2229.740718            | 8.3                             |
| TS4RS''  | 63.01                         | -2229.745153            | 5.3                             |
| TS4RS''' | 175.56                        | -2229.728919            | 15.7                            |
| TS4SR    | 127.13                        | -2229.753939            | 0.0                             |
| TS4SR'   | 33.01                         | -2229.75019             | 2.3                             |
| TS4SR''  | -68.90                        | -2229.744921            | 5.6                             |
| TS4SR''' | 163.81                        | -2229.745378            | 5.4                             |
| TS4SS    | -81.32                        | -2229.749388            | 2.8                             |
| TS4SS'   | -179.84                       | -2229.731383            | 14.1                            |
| TS4SS''  | 88.28                         | -2229.734993            | 11.9                            |
| TS4SS''' | -21.41                        | -2229.746111            | 4.9                             |

## 7. RR/RS/SS-Configurational Reaction Pathways

**Fig. S6** Free energy profiles of RR/RS/SS-configurational pathways. Energies are in kcal/mol.

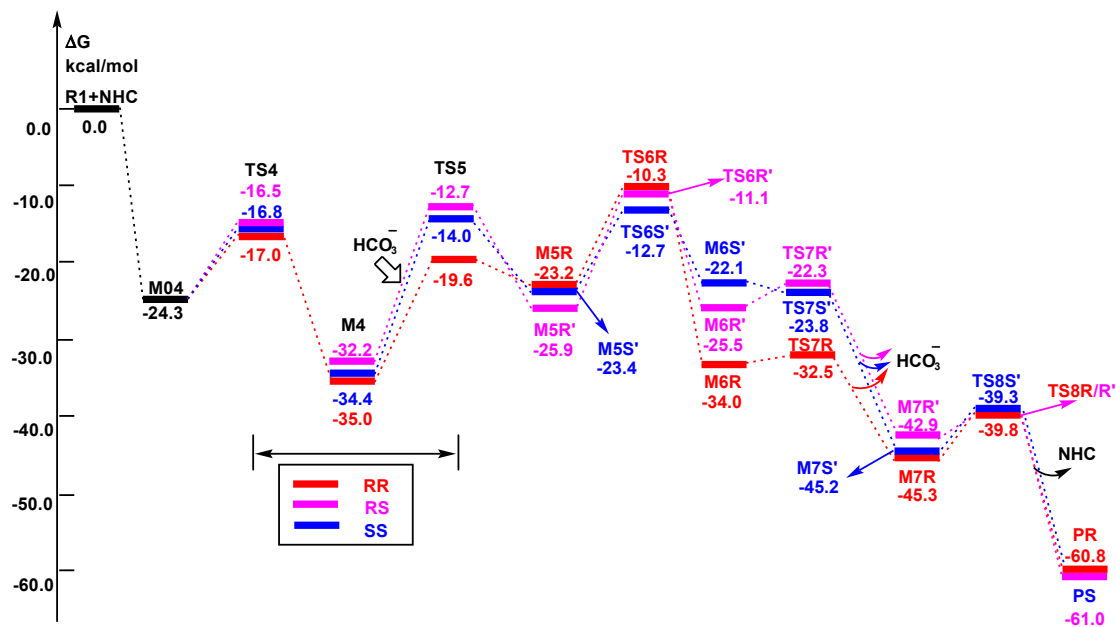

## 8. Transformation Pathways of 1,2-Addition Intermediate.

In this work, we investigated the reaction pathways starting from *re/si*-M4. To form the six-membered ring product, *re/si*-M4 should undergo proton transfer (from C7 to C5). However, for both direct and mediator assisted proton transfer, we can not locate the transition state despite of lots of attempts. The flexible potential energy scan shown in Fig. S7 indicates that the energy barrier keeps increasing with the proton transferring to C5. The corresponding energy barrier is estimated to be not lower than 76 kcal/mol for direct mechanism (Figs. S7a and S7b) or 37 kcal/mol for  $\text{HCO}_3^-$  assisted mechanism (Figs. S7c and S7d). Therefore, the 1,2-addition pathway can be ruled out safely.

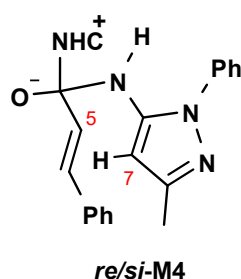

**Fig. S7** (a) and (b) Energy change along proton transfer in *re*-M4 and *si*-M4, (c) and (d) Energy change along proton transfer in *re*-M4 and *si*-M4 in the presence of  $\text{HCO}_3^-$ .

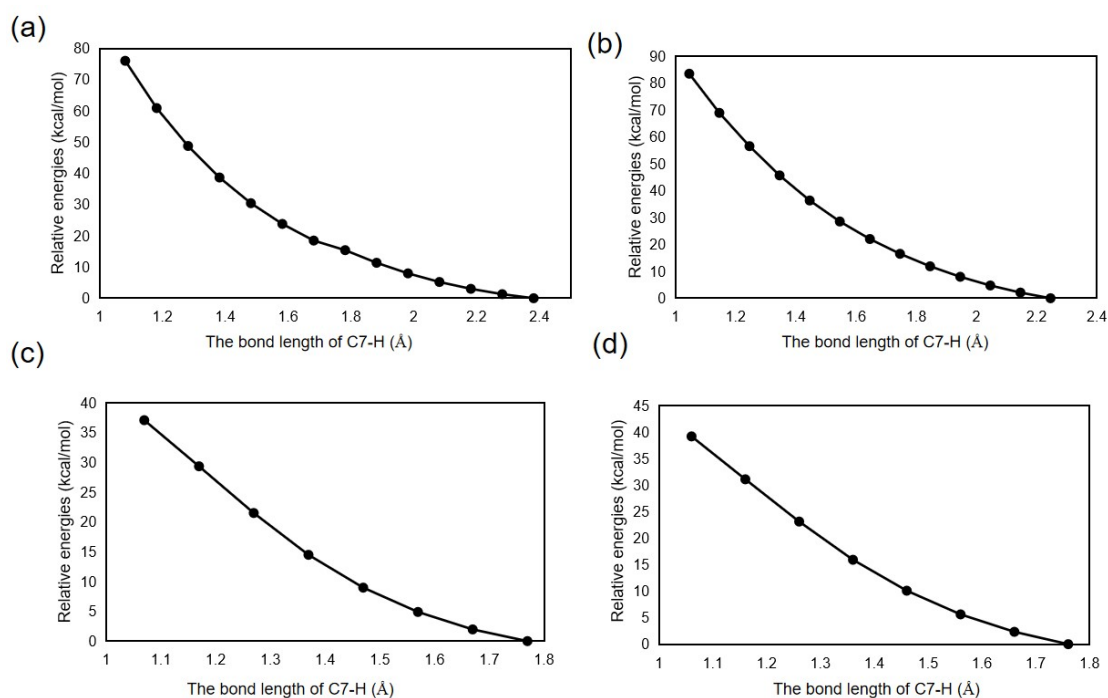

## 9. Possible Reaction Pathways for the Transformation of M3.

**Fig. S8** Free energy profile for the reaction of **M3** and **Pre-R2**. Energies and bond distances are in kcal/mol and Å, respectively.

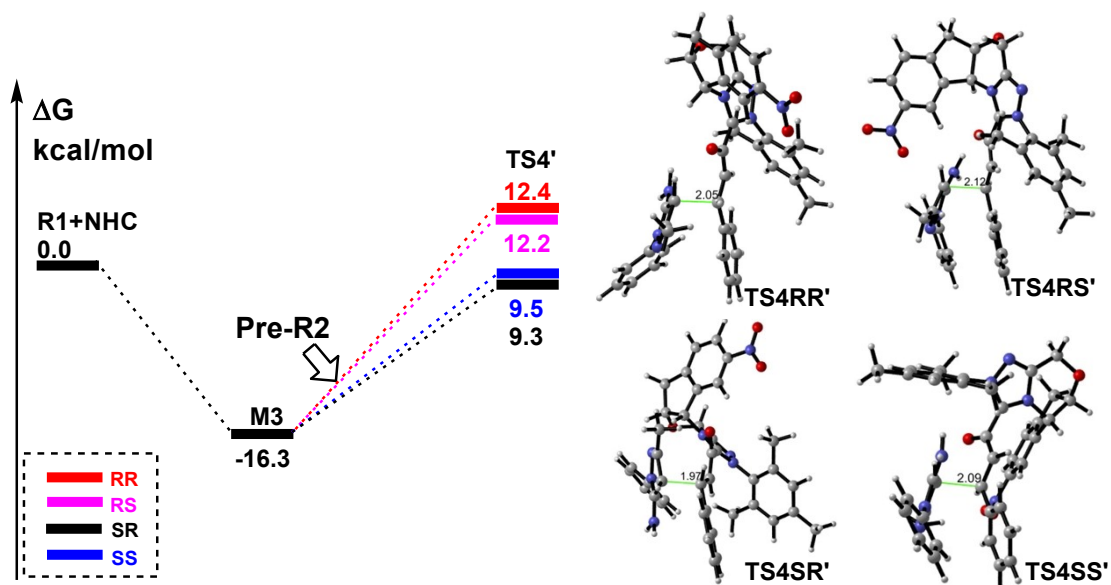

## 10. Reaction Pathways for the Transformation of M4SR→M6S.

Scheme S3. Proposed pathways for the transformation of M4SR to M6S.

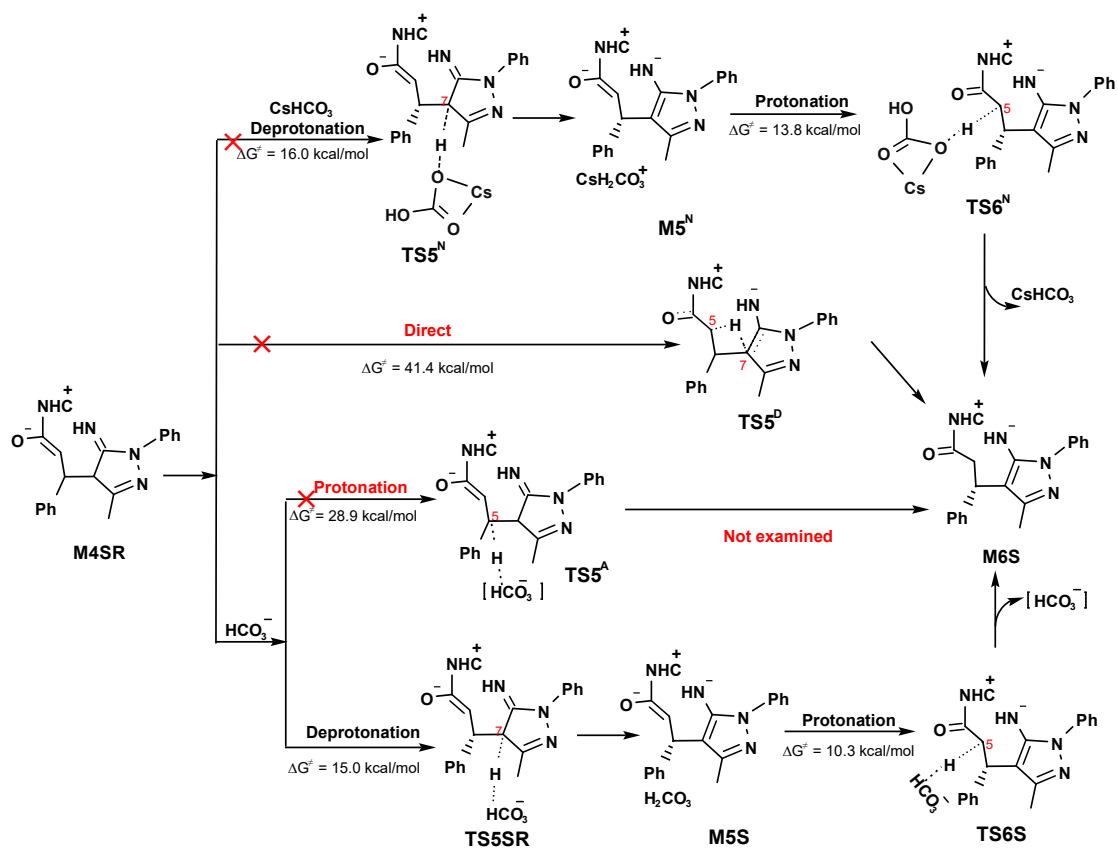

**Fig. S9** Free energy (kcal/mol) profile for the transformation of **M4SR**→**M6S**. Energies are in kcal/mol.

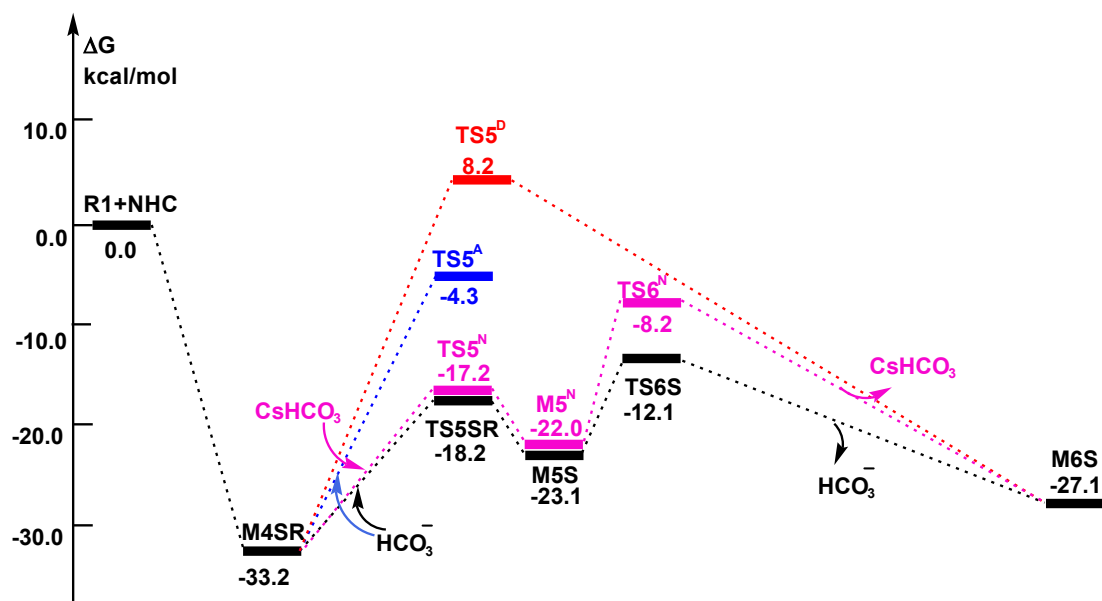

## 11. Cartesian coordinates of all the stationary points

### NHC

|   |             |             |             |
|---|-------------|-------------|-------------|
| C | -0.48247100 | -0.27936600 | -0.65665100 |
| C | -0.34335100 | -2.25859500 | 0.42798900  |
| C | 1.67241500  | -1.56104700 | -0.87828500 |
| H | 1.61066800  | -1.69464300 | -1.96046700 |
| N | -1.54105500 | -1.83710200 | 0.69531100  |
| N | -1.59143100 | -0.62978000 | 0.02452000  |
| N | 0.31739200  | -1.35633500 | -0.36520700 |
| C | 0.30917300  | -3.52591300 | 0.88715500  |
| H | -0.39615000 | -4.35520200 | 0.81755700  |
| H | 0.62011700  | -3.43262800 | 1.93566800  |
| C | 2.30929100  | -2.78601000 | -0.17123800 |
| O | 1.40501100  | -3.84473800 | 0.05034300  |
| C | 3.37100600  | -0.81768200 | 0.63319300  |
| C | 2.59752600  | -0.44126800 | -0.46984300 |
| C | 2.71707100  | 0.81490400  | -1.04269000 |
| C | 3.65120500  | 1.67458800  | -0.47556800 |
| C | 4.44226800  | 1.32827200  | 0.61679100  |
| C | 4.29982700  | 0.06450100  | 1.17912900  |
| C | 3.02257700  | -2.21435600 | 1.07561800  |
| H | 2.11377600  | 1.12571200  | -1.88645900 |
| H | 5.15374500  | 2.04458400  | 1.00759400  |
| H | 4.90765500  | -0.22321200 | 2.03022900  |
| H | 2.34991200  | -2.16784900 | 1.94022500  |
| H | 3.88976500  | -2.81080700 | 1.36531900  |
| C | -2.80323400 | 0.13091900  | 0.08241900  |
| C | -3.11024200 | 0.81561400  | 1.26013800  |
| C | -3.64317000 | 0.14508000  | -1.03481300 |
| C | -4.30334400 | 1.53745700  | 1.30103800  |
| C | -4.82261600 | 0.88308600  | -0.95021600 |
| C | -5.16756300 | 1.58466900  | 0.20688000  |
| H | -4.56056800 | 2.07809700  | 2.20878100  |
| H | -5.49122400 | 0.90584100  | -1.80763100 |
| C | -3.27774300 | -0.61650700 | -2.28092200 |
| H | -3.09169100 | -1.67051700 | -2.05192700 |
| H | -2.35979600 | -0.21801800 | -2.72176500 |
| H | -4.07917800 | -0.55592700 | -3.01913300 |
| C | -2.17260600 | 0.77110300  | 2.43692000  |
| H | -1.16031200 | 1.05676100  | 2.13445200  |
| H | -2.11154500 | -0.23999800 | 2.84977600  |
| H | -2.50666400 | 1.44966100  | 3.22353500  |

|                                    |             |             |             |
|------------------------------------|-------------|-------------|-------------|
| H                                  | 3.06538900  | -3.19223600 | -0.84713200 |
| C                                  | -6.43593900 | 2.39749100  | 0.25891200  |
| H                                  | -6.28557300 | 3.37904600  | -0.20223400 |
| H                                  | -7.24499500 | 1.90130100  | -0.28269900 |
| H                                  | -6.75953900 | 2.56121300  | 1.28920800  |
| N                                  | 3.81569000  | 3.01035300  | -1.06015400 |
| O                                  | 4.62309800  | 3.76496400  | -0.54517600 |
| O                                  | 3.13718400  | 3.29461800  | -2.03172800 |
| <b>H<sub>2</sub>O</b>              |             |             |             |
| O                                  | 0.02432200  | 0.00000000  | 0.01729100  |
| H                                  | 0.06782100  | 0.00000000  | 0.97925400  |
| H                                  | 0.94792700  | 0.00000000  | -0.25467000 |
| <b>HCO<sub>3</sub><sup>-</sup></b> |             |             |             |
| H                                  | -8.97724900 | 6.49895100  | -3.08667300 |
| C                                  | -8.26864100 | 5.05384900  | -2.09480900 |
| O                                  | -7.33382700 | 4.70823500  | -1.35643200 |
| O                                  | -9.26098800 | 4.42181000  | -2.51378900 |
| O                                  | -8.19298100 | 6.39160000  | -2.53494200 |
| <b>DQ</b>                          |             |             |             |
| C                                  | 2.80615900  | 1.28442700  | -0.00551300 |
| C                                  | 1.45878900  | 1.23643000  | -0.08185700 |
| C                                  | 0.69369700  | 0.00067300  | -0.09319500 |
| C                                  | 1.46107600  | -1.23370400 | -0.09001300 |
| C                                  | 2.80853100  | -1.27975200 | -0.01413000 |
| C                                  | 3.56682400  | 0.00270400  | 0.08861200  |
| H                                  | 0.91799900  | 2.16916000  | -0.13410600 |
| H                                  | 0.92224700  | -2.16694400 | -0.15253100 |
| C                                  | -0.69365400 | -0.00054100 | -0.09309500 |
| C                                  | -1.45874500 | -1.23629500 | -0.08142000 |
| C                                  | -1.46102900 | 1.23383800  | -0.09002500 |
| C                                  | -2.80610800 | -1.28427700 | -0.00494500 |
| H                                  | -0.91795600 | -2.16903600 | -0.13350800 |
| C                                  | -2.80847800 | 1.27990200  | -0.01403500 |
| H                                  | -0.92220500 | 2.16706800  | -0.15272000 |
| C                                  | -3.56676800 | -0.00253500 | 0.08896400  |
| O                                  | 4.78453300  | 0.00333600  | 0.24291600  |
| O                                  | -4.78447200 | -0.00313800 | 0.24331000  |
| C                                  | 3.58611400  | -2.59579600 | -0.01528200 |
| C                                  | 4.58459300  | -2.61321700 | -1.18859600 |
| C                                  | 4.33904900  | -2.76187700 | 1.31854900  |
| C                                  | 2.65274900  | -3.80107900 | -0.17948100 |
| H                                  | 4.05904700  | -2.49999000 | -2.14237100 |
| H                                  | 5.32250800  | -1.81680300 | -1.09570100 |
| H                                  | 5.10873000  | -3.57446600 | -1.20329000 |

|   |             |             |             |
|---|-------------|-------------|-------------|
| H | 3.63614500  | -2.76074300 | 2.15785300  |
| H | 4.86591700  | -3.72193000 | 1.31928300  |
| H | 5.06687200  | -1.96477400 | 1.46656200  |
| H | 3.25231200  | -4.71541600 | -0.19200600 |
| H | 1.94115900  | -3.88299700 | 0.64877900  |
| H | 2.09216800  | -3.75605300 | -1.11903900 |
| C | 3.58133400  | 2.60187600  | 0.00331200  |
| C | 4.33310900  | 2.75996100  | 1.33873700  |
| C | 4.58059300  | 2.62923200  | -1.16919700 |
| C | 2.64582900  | 3.80656700  | -0.15308600 |
| H | 3.62977400  | 2.75070900  | 2.17763500  |
| H | 5.06291500  | 1.96366700  | 1.48120200  |
| H | 4.85750400  | 3.72133500  | 1.34702600  |
| H | 4.05582900  | 2.52206800  | -2.12410600 |
| H | 5.10332600  | 3.59132800  | -1.17658200 |
| H | 5.31952500  | 1.83315900  | -1.08138500 |
| H | 3.24383100  | 4.72198200  | -0.16021400 |
| H | 2.08485700  | 3.76634600  | -1.09262900 |
| H | 1.93454800  | 3.88213500  | 0.67602800  |
| C | -3.58605300 | 2.59595000  | -0.01533400 |
| C | -4.33893300 | 2.76222400  | 1.31850400  |
| C | -2.65269200 | 3.80120600  | -0.17974400 |
| C | -4.58457900 | 2.61321100  | -1.18861100 |
| H | -5.06674300 | 1.96513700  | 1.46666700  |
| H | -3.63599200 | 2.76122100  | 2.15777900  |
| H | -4.86580800 | 3.72227300  | 1.31911600  |
| H | -2.09216900 | 3.75605500  | -1.11933100 |
| H | -3.25225000 | 4.71554500  | -0.19235200 |
| H | -1.94104800 | 3.88322900  | 0.64846000  |
| H | -5.10870300 | 3.57446500  | -1.20342600 |
| H | -4.05907200 | 2.49983700  | -2.14239000 |
| H | -5.32250200 | 1.81682300  | -1.09557200 |
| C | -3.58128100 | -2.60172600 | 0.00423700  |
| C | -4.33295300 | -2.75950100 | 1.33975700  |
| C | -4.58062800 | -2.62935600 | -1.16818900 |
| C | -2.64578500 | -3.80645100 | -0.15194800 |
| H | -3.62955800 | -2.75002000 | 2.17860100  |
| H | -5.06277200 | -1.96319200 | 1.48207900  |
| H | -4.85732200 | -3.72088800 | 1.34832600  |
| H | -4.05593500 | -2.52241700 | -2.12316200 |
| H | -5.10336500 | -3.59145200 | -1.17530600 |
| H | -5.31954900 | -1.83325700 | -1.08050600 |
| H | -3.24378700 | -4.72186800 | -0.15883200 |
| H | -2.08486900 | -3.76644400 | -1.09153300 |

|               |             |             |             |
|---------------|-------------|-------------|-------------|
| H             | -1.93445400 | -3.88183200 | 0.67714100  |
| <b>[DQH]-</b> |             |             |             |
| H             | -5.27959300 | 0.75364900  | -0.19655600 |
| C             | -2.85518300 | 1.16459400  | -0.31678800 |
| C             | -1.45877700 | 1.13450500  | -0.32280200 |
| C             | -0.71955700 | -0.00762500 | -0.00028900 |
| C             | -1.44257000 | -1.16209700 | 0.32436900  |
| C             | -2.83590300 | -1.21310100 | 0.32775000  |
| C             | -3.53093600 | -0.02860900 | 0.00965800  |
| H             | -0.91071800 | 2.02397200  | -0.60733000 |
| H             | -0.88062300 | -2.04461600 | 0.60415000  |
| C             | 0.75874000  | 0.00306900  | -0.00062400 |
| C             | 1.50134200  | -1.14471100 | -0.31387100 |
| C             | 1.48409100  | 1.16095400  | 0.31543300  |
| C             | 2.88874700  | -1.17444100 | -0.31982700 |
| H             | 0.95152100  | -2.04005700 | -0.59049800 |
| C             | 2.87089400  | 1.20998100  | 0.32730400  |
| H             | 0.92095800  | 2.04829100  | 0.59128100  |
| C             | 3.64317500  | 0.02288800  | 0.00604700  |
| O             | -4.90536100 | -0.09984600 | 0.03577200  |
| O             | 4.92214200  | 0.03153700  | 0.01060700  |
| C             | -3.58102400 | -2.51189500 | 0.67795600  |
| C             | -4.45387500 | -2.31396900 | 1.93055900  |
| C             | -4.45254200 | -2.96181800 | -0.50970500 |
| C             | -2.60806900 | -3.65948600 | 0.98327100  |
| H             | -3.83320100 | -2.01658100 | 2.78211900  |
| H             | -5.21766700 | -1.55269700 | 1.77455600  |
| H             | -4.94998400 | -3.25706300 | 2.18664400  |
| H             | -3.82790100 | -3.13980300 | -1.39135800 |
| H             | -4.96057900 | -3.90023900 | -0.26011600 |
| H             | -5.20628900 | -2.21597200 | -0.76192900 |
| H             | -3.18409200 | -4.56118200 | 1.21300700  |
| H             | -1.96071300 | -3.88393400 | 0.12960200  |
| H             | -1.97537300 | -3.43798500 | 1.84833500  |
| C             | -3.61507800 | 2.45707700  | -0.66995600 |
| C             | -4.47747000 | 2.26053600  | -1.93572100 |
| C             | -4.46498700 | 2.93262800  | 0.52909600  |
| C             | -2.65633300 | 3.61359200  | -0.99055500 |
| H             | -3.83147200 | 2.02043900  | -2.78513200 |
| H             | -5.21717900 | 1.45803000  | -1.86896700 |
| H             | -5.01649900 | 3.18522300  | -2.16574800 |
| H             | -3.80841800 | 3.17334200  | 1.37025500  |
| H             | -5.01975300 | 3.83661500  | 0.25788300  |

|           |             |             |             |
|-----------|-------------|-------------|-------------|
| H         | -5.18823600 | 2.20028500  | 0.89786500  |
| H         | -3.24221000 | 4.50800200  | -1.22297400 |
| H         | -2.00715600 | 3.84771900  | -0.14189900 |
| H         | -2.02828600 | 3.38907900  | -1.85723600 |
| C         | 3.61382600  | 2.50199300  | 0.68975900  |
| C         | 4.50428800  | 2.93866600  | -0.48781900 |
| C         | 2.66178000  | 3.66303200  | 1.00191400  |
| C         | 4.48813800  | 2.27279700  | 1.93526300  |
| H         | 5.19714300  | 2.13666200  | -0.74285800 |
| H         | 3.88699300  | 3.16951500  | -1.36365100 |
| H         | 5.07044100  | 3.84119600  | -0.22453200 |
| H         | 2.01948600  | 3.44322900  | 1.86154900  |
| H         | 3.24754700  | 4.55699600  | 1.24286200  |
| H         | 2.01913000  | 3.90399800  | 0.14796000  |
| H         | 5.05327400  | 3.18131100  | 2.17914700  |
| H         | 3.86005500  | 2.02262000  | 2.79788900  |
| H         | 5.18142300  | 1.45191000  | 1.75272700  |
| C         | 3.65132900  | -2.45727200 | -0.67440000 |
| C         | 4.53742900  | -2.21772900 | -1.90953000 |
| C         | 4.53373200  | -2.88182300 | 0.51366700  |
| C         | 2.71725600  | -3.63015200 | -0.99665500 |
| H         | 3.91700300  | -1.96914700 | -2.77811800 |
| H         | 5.22263100  | -1.39242100 | -1.71642800 |
| H         | 5.11150500  | -3.12150200 | -2.15005300 |
| H         | 3.90934400  | -3.12320000 | 1.38156600  |
| H         | 5.11705400  | -3.77509400 | 0.25636400  |
| H         | 5.21076400  | -2.06926500 | 0.77774300  |
| H         | 3.31675800  | -4.51646400 | -1.23210000 |
| H         | 2.06934200  | -3.87983200 | -0.14926400 |
| H         | 2.08068100  | -3.41816300 | -1.86254600 |
| <b>R1</b> |             |             |             |
| C         | -6.07044700 | -0.23417000 | -1.58469100 |
| C         | -4.68844500 | -0.13477700 | -1.66528100 |
| C         | -4.04379600 | 1.07678900  | -1.37183700 |
| C         | -4.82235200 | 2.18068900  | -0.99897700 |
| C         | -6.20739800 | 2.08110200  | -0.91754500 |
| C         | -6.83421700 | 0.87294800  | -1.21023300 |
| H         | -6.55733100 | -1.17638700 | -1.81387500 |
| H         | -4.10723700 | -1.00291400 | -1.95931500 |
| H         | -4.33049100 | 3.12248200  | -0.77197200 |
| H         | -6.79569100 | 2.94509700  | -0.62691100 |
| H         | -7.91451200 | 0.79083900  | -1.14810700 |
| C         | -2.58965300 | 1.23667800  | -1.43947000 |
| H         | -2.20633200 | 2.23071500  | -1.20860200 |

|   |             |             |             |
|---|-------------|-------------|-------------|
| C | -1.67736300 | 0.30120700  | -1.75033200 |
| C | -0.24369000 | 0.64575900  | -1.76820700 |
| H | 0.44172700  | -0.18165300 | -2.03204300 |
| O | 0.19979200  | 1.75004300  | -1.51726900 |
| H | -1.94192600 | -0.72309600 | -1.99438500 |

**Pre-R2**

|   |            |             |             |
|---|------------|-------------|-------------|
| C | 4.01729700 | -1.31731600 | 5.67665100  |
| C | 2.69138400 | -0.97724100 | 5.31503200  |
| C | 2.66304900 | -1.08512400 | 3.93803200  |
| N | 3.90938600 | -1.48451700 | 3.55350100  |
| H | 1.87797100 | -0.67876000 | 5.95821900  |
| N | 4.75465500 | -1.61803200 | 4.62057200  |
| C | 4.39529700 | -1.68651800 | 2.23727400  |
| C | 3.70541300 | -2.51374200 | 1.35116600  |
| C | 5.58151000 | -1.06504500 | 1.84833100  |
| C | 4.18600700 | -2.68530100 | 0.05524700  |
| H | 2.81959500 | -3.04631500 | 1.68566900  |
| C | 6.06516300 | -1.26098700 | 0.55970700  |
| H | 6.10643700 | -0.44067300 | 2.56261400  |
| C | 5.36444400 | -2.06026200 | -0.34288300 |
| H | 3.64661800 | -3.32578500 | -0.63463200 |
| H | 6.98878400 | -0.77932700 | 0.25580800  |
| H | 5.74222700 | -2.20205000 | -1.34981600 |
| N | 1.67612200 | -0.73617200 | 3.03069500  |
| H | 0.75314300 | -0.72845300 | 3.44269900  |
| C | 4.60581700 | -1.36970700 | 7.05133500  |
| H | 4.08510300 | -2.10202800 | 7.67455100  |
| H | 5.65938800 | -1.64762100 | 6.99359000  |
| H | 4.52613600 | -0.39867500 | 7.54784200  |
| H | 1.68375700 | -1.24675200 | 2.15835400  |

**R2**

|   |            |             |            |
|---|------------|-------------|------------|
| C | 3.79547500 | -0.96708800 | 5.94248900 |
| C | 2.46242600 | -1.17471100 | 5.56868400 |
| C | 2.46925400 | -1.43885400 | 4.17326600 |
| N | 3.83994000 | -1.36208000 | 3.83396200 |
| H | 1.58326300 | -1.14774700 | 6.19636900 |
| N | 4.64482200 | -1.07066800 | 4.93273800 |
| C | 4.45559400 | -1.54582600 | 2.59733500 |
| C | 3.72565500 | -1.82705300 | 1.42734100 |
| C | 5.85800900 | -1.44730100 | 2.50675600 |
| C | 4.39297000 | -2.00293600 | 0.21846500 |
| H | 2.64931800 | -1.90114700 | 1.50250900 |
| C | 6.50100300 | -1.62538500 | 1.28911500 |
| H | 6.41823500 | -1.23062300 | 3.40623000 |

|   |            |             |             |
|---|------------|-------------|-------------|
| C | 5.77925900 | -1.90580300 | 0.12912200  |
| H | 3.80934900 | -2.22164100 | -0.67206200 |
| H | 7.58397100 | -1.54337900 | 1.24911600  |
| H | 6.28623300 | -2.04554200 | -0.82021200 |
| N | 1.52505000 | -1.70412200 | 3.29005700  |
| H | 0.64501100 | -1.69896800 | 3.80663000  |
| C | 4.32163100 | -0.65709000 | 7.31216700  |
| H | 4.08679400 | -1.46075100 | 8.01732000  |
| H | 5.40600800 | -0.53176900 | 7.27787700  |
| H | 3.87732900 | 0.26133100  | 7.70839800  |

**re-TS1**

|   |             |             |             |
|---|-------------|-------------|-------------|
| C | 0.46015200  | -0.61634800 | -0.01933000 |
| C | 1.10852600  | -2.73878800 | -0.15702800 |
| C | 2.66884000  | -1.07366500 | -1.19982800 |
| H | 2.35952200  | -0.74516800 | -2.19192000 |
| N | -0.03980900 | -2.79090800 | 0.44685200  |
| N | -0.41747200 | -1.47211400 | 0.51715800  |
| N | 1.45103600  | -1.44177800 | -0.45068900 |
| C | 2.00400600  | -3.89399500 | -0.48181400 |
| H | 1.41361400  | -4.70966000 | -0.90204800 |
| H | 2.48422800  | -4.25890100 | 0.43522500  |
| C | 3.61145900  | -2.30271100 | -1.19741400 |
| O | 2.95814600  | -3.52403000 | -1.45404300 |
| C | 4.48105600  | -0.70123800 | 0.30890200  |
| C | 3.50552800  | -0.05705800 | -0.46206600 |
| C | 3.43128400  | 1.32536400  | -0.53011200 |
| C | 4.34153300  | 2.03398600  | 0.24620100  |
| C | 5.30742400  | 1.42590100  | 1.04290700  |
| C | 5.38456500  | 0.03711200  | 1.06723200  |
| C | 4.39440300  | -2.19467500 | 0.13196300  |
| H | 2.70899400  | 1.81351000  | -1.17639300 |
| H | 5.98807900  | 2.04095200  | 1.61793700  |
| H | 6.14686100  | -0.45544800 | 1.66132400  |
| H | 3.83968700  | -2.64012300 | 0.96674900  |
| H | 5.36844600  | -2.68511400 | 0.08260900  |
| C | -1.68508200 | -1.13114500 | 1.09625000  |
| C | -1.70551300 | -0.48403700 | 2.33404300  |
| C | -2.84048200 | -1.40959000 | 0.36378600  |
| C | -2.94719500 | -0.09439600 | 2.83237300  |
| C | -4.05871200 | -0.99999000 | 0.90372700  |
| C | -4.12921800 | -0.33442100 | 2.12674900  |
| H | -2.99233700 | 0.41916700  | 3.79017100  |
| H | -4.96889900 | -1.16770700 | 0.33183800  |
| C | -2.75839000 | -2.07681400 | -0.98125600 |

|               |             |             |             |
|---------------|-------------|-------------|-------------|
| H             | -2.32841000 | -3.07900800 | -0.90056900 |
| H             | -2.11530700 | -1.49419600 | -1.65204200 |
| H             | -3.74923400 | -2.14954800 | -1.43256200 |
| C             | -0.42868100 | -0.18339100 | 3.07464500  |
| H             | 0.14054500  | 0.60478200  | 2.56971900  |
| H             | 0.21598000  | -1.06561300 | 3.12632200  |
| H             | -0.64446100 | 0.15015400  | 4.09093800  |
| H             | 4.31219300  | -2.16937100 | -2.02510800 |
| C             | -5.44901700 | 0.14643400  | 2.67105900  |
| H             | -5.45393000 | 1.23762300  | 2.75705900  |
| H             | -6.27458800 | -0.14236400 | 2.01725600  |
| H             | -5.63656400 | -0.26225000 | 3.66838000  |
| N             | 4.28429900  | 3.50016900  | 0.21737700  |
| O             | 5.12887900  | 4.11809100  | 0.84378900  |
| O             | 3.39227100  | 4.02291100  | -0.42753100 |
| C             | -5.49973500 | 2.05775300  | -0.31178400 |
| C             | -4.12013700 | 2.07455400  | -0.48024300 |
| C             | -3.51730000 | 1.35338600  | -1.52015900 |
| C             | -4.33939100 | 0.64557500  | -2.40570600 |
| C             | -5.72037700 | 0.61712300  | -2.23078000 |
| C             | -6.30514900 | 1.31943800  | -1.17894400 |
| H             | -5.95148400 | 2.62585900  | 0.49577000  |
| H             | -3.49992700 | 2.65610300  | 0.19589100  |
| H             | -3.88371300 | 0.09500300  | -3.22504400 |
| H             | -6.33998100 | 0.04947300  | -2.91810000 |
| H             | -7.38199900 | 1.30459600  | -1.04393800 |
| C             | -2.05468700 | 1.27484400  | -1.66975100 |
| H             | -1.65509700 | 1.06959800  | -2.66250400 |
| C             | -1.18927000 | 1.35380700  | -0.65587700 |
| C             | 0.29162400  | 1.20240800  | -0.85384300 |
| H             | 0.86403300  | 1.70734800  | -0.04867500 |
| O             | 0.79132400  | 1.09875200  | -1.99902300 |
| H             | -1.52998200 | 1.50439300  | 0.36790500  |
| <b>si-TS1</b> |             |             |             |
| C             | 0.39783000  | -0.92494800 | -0.49512200 |
| C             | 1.82209200  | -2.11550100 | 0.73632200  |
| C             | 2.80622800  | -1.13582300 | -1.28829300 |
| H             | 2.42823500  | -0.91244200 | -2.28829300 |
| N             | 0.72383200  | -2.12197500 | 1.42692200  |
| N             | -0.13214800 | -1.37183500 | 0.64958500  |
| N             | 1.66357700  | -1.40927200 | -0.42774100 |
| C             | 3.12693400  | -2.81358900 | 0.93799000  |
| H             | 3.01546500  | -3.64940800 | 1.62791300  |
| H             | 3.88704000  | -2.12490100 | 1.33185400  |

|   |             |             |             |
|---|-------------|-------------|-------------|
| C | 3.78781500  | -2.36708700 | -1.31889200 |
| O | 3.49763700  | -3.33886500 | -0.32651200 |
| C | 4.98789400  | -0.37121800 | -0.63654400 |
| C | 3.64631000  | -0.00532400 | -0.73005800 |
| C | 3.19088300  | 1.23854000  | -0.31230600 |
| C | 4.14987500  | 2.09598800  | 0.21198500  |
| C | 5.50040000  | 1.76841300  | 0.31820400  |
| C | 5.92582800  | 0.51845900  | -0.11426300 |
| C | 5.20451100  | -1.76747900 | -1.15510300 |
| H | 2.14699400  | 1.53729700  | -0.41292900 |
| H | 6.19122200  | 2.48716200  | 0.74012000  |
| H | 6.97126400  | 0.24061000  | -0.03364100 |
| H | 5.80436100  | -2.38921400 | -0.48428900 |
| H | 5.72022900  | -1.74009300 | -2.12028900 |
| C | -1.45424600 | -1.07730600 | 1.12224000  |
| C | -1.67022700 | 0.15613700  | 1.73788900  |
| C | -2.47007000 | -2.00365100 | 0.88679700  |
| C | -2.97728700 | 0.46096100  | 2.11306300  |
| C | -3.75972900 | -1.65632900 | 1.28486300  |
| C | -4.03182600 | -0.42323700 | 1.87882500  |
| H | -3.18077100 | 1.42355300  | 2.57648100  |
| H | -4.57533200 | -2.35074700 | 1.09721800  |
| C | -2.17462700 | -3.30713200 | 0.19437400  |
| H | -1.41770600 | -3.88059300 | 0.73728200  |
| H | -1.78348500 | -3.13045400 | -0.81363300 |
| H | -3.07771700 | -3.91377400 | 0.11081200  |
| C | -0.54365400 | 1.13924000  | 1.90874700  |
| H | -0.25612700 | 1.55027500  | 0.93205700  |
| H | 0.33952400  | 0.66029500  | 2.34348900  |
| H | -0.84728800 | 1.96078600  | 2.56013500  |
| H | 3.68563400  | -2.90439600 | -2.26148500 |
| C | -5.44758300 | -0.01949400 | 2.19064100  |
| H | -5.49652100 | 0.60728700  | 3.08440400  |
| H | -5.85503200 | 0.55724500  | 1.35210200  |
| H | -6.08846000 | -0.89152200 | 2.33974200  |
| N | 3.71615600  | 3.41537800  | 0.69037100  |
| O | 4.57416700  | 4.19513200  | 1.07020500  |
| O | 2.52295900  | 3.65900500  | 0.68709800  |
| C | -6.07051700 | -0.24561600 | -1.53403200 |
| C | -4.68349500 | -0.16805200 | -1.54154800 |
| C | -4.03101800 | 1.04939800  | -1.29483400 |
| C | -4.81552200 | 2.17714300  | -1.02090700 |
| C | -6.20665300 | 2.10381600  | -1.01929700 |
| C | -6.84003500 | 0.89180900  | -1.28104000 |

|              |             |             |             |
|--------------|-------------|-------------|-------------|
| H            | -6.55658900 | -1.19743100 | -1.72471700 |
| H            | -4.09830400 | -1.06544900 | -1.72032000 |
| H            | -4.32319900 | 3.12449600  | -0.81780000 |
| H            | -6.79378600 | 2.99310100  | -0.81300000 |
| H            | -7.92340600 | 0.82869200  | -1.27958800 |
| C            | -2.56698300 | 1.19013700  | -1.31959900 |
| H            | -2.16660700 | 2.14394900  | -0.97702300 |
| C            | -1.67750200 | 0.28178400  | -1.72936600 |
| C            | -0.20921900 | 0.59226700  | -1.73439400 |
| H            | 0.30965800  | 0.11021500  | -2.58828000 |
| O            | 0.23148700  | 1.66747000  | -1.27333700 |
| H            | -1.96766900 | -0.69637900 | -2.10997100 |
| <b>re-M1</b> |             |             |             |
| C            | 0.48799900  | -0.91286000 | -0.17648200 |
| C            | 1.54481400  | -2.83018800 | -0.30562700 |
| C            | 2.86274000  | -0.84235200 | -1.09965500 |
| H            | 2.51829900  | -0.50442100 | -2.07581800 |
| N            | 0.33627600  | -3.14294600 | 0.05492000  |
| N            | -0.30699900 | -1.93599600 | 0.13253600  |
| N            | 1.68597500  | -1.47503400 | -0.45605700 |
| C            | 2.68614500  | -3.76681300 | -0.54651900 |
| H            | 2.30938300  | -4.68906400 | -0.98993200 |
| H            | 3.17051200  | -4.01639200 | 0.40597500  |
| C            | 4.00737700  | -1.88716900 | -1.13434300 |
| O            | 3.59344100  | -3.19366300 | -1.46166400 |
| C            | 4.57459100  | -0.23279200 | 0.45170400  |
| C            | 3.49188100  | 0.26058200  | -0.28345100 |
| C            | 3.16054900  | 1.60881200  | -0.28506900 |
| C            | 3.94324300  | 2.43358100  | 0.51388100  |
| C            | 5.01642200  | 1.97392100  | 1.27451700  |
| C            | 5.34174000  | 0.62282700  | 1.23811200  |
| C            | 4.75372500  | -1.70798400 | 0.20676300  |
| H            | 2.32422200  | 1.96283300  | -0.88713500 |
| H            | 5.58642000  | 2.67613300  | 1.86971700  |
| H            | 6.18836500  | 0.25077500  | 1.80504600  |
| H            | 4.28267200  | -2.28223500 | 1.01369000  |
| H            | 5.79842600  | -2.01769500 | 0.14515300  |
| C            | -1.72993400 | -1.91408600 | 0.34065100  |
| C            | -2.22372900 | -2.07978000 | 1.63202200  |
| C            | -2.53952400 | -1.72371900 | -0.78346100 |
| C            | -3.61037300 | -2.03800500 | 1.79236200  |
| C            | -3.91329500 | -1.67988500 | -0.56886200 |
| C            | -4.46316000 | -1.83084100 | 0.70830000  |
| H            | -4.02855900 | -2.15911600 | 2.78822900  |

|              |             |             |             |
|--------------|-------------|-------------|-------------|
| H            | -4.57375700 | -1.51377500 | -1.41642500 |
| C            | -1.93530100 | -1.56343800 | -2.15323900 |
| H            | -1.35944800 | -2.45491500 | -2.42524000 |
| H            | -1.25678800 | -0.70195500 | -2.19583700 |
| H            | -2.71936900 | -1.42258500 | -2.89883600 |
| C            | -1.29061400 | -2.27840100 | 2.79611600  |
| H            | -0.57951800 | -1.44932500 | 2.87473900  |
| H            | -0.70769800 | -3.19658700 | 2.67815800  |
| H            | -1.84903100 | -2.34025900 | 3.73104500  |
| H            | 4.67498300  | -1.58597500 | -1.94518400 |
| C            | -5.95277700 | -1.72698900 | 0.90007100  |
| H            | -6.24241700 | -1.97461700 | 1.92314200  |
| H            | -6.28618400 | -0.70582800 | 0.68603300  |
| H            | -6.48543500 | -2.39474300 | 0.21742500  |
| N            | 3.62790800  | 3.86705700  | 0.55486400  |
| O            | 4.31765900  | 4.58406000  | 1.26122900  |
| O            | 2.69350200  | 4.26411200  | -0.11755800 |
| C            | -5.39366500 | 2.11428800  | 0.78058200  |
| C            | -4.10163800 | 1.64803500  | 0.56502500  |
| C            | -3.34312400 | 2.11332000  | -0.52023900 |
| C            | -3.93297100 | 3.03799100  | -1.39142500 |
| C            | -5.22830000 | 3.50202600  | -1.18015500 |
| C            | -5.96354600 | 3.04467000  | -0.09018300 |
| H            | -5.96215400 | 1.74772100  | 1.63057600  |
| H            | -3.68142600 | 0.90129300  | 1.23380300  |
| H            | -3.36026700 | 3.39767000  | -2.24226100 |
| H            | -5.66202500 | 4.22146900  | -1.86770500 |
| H            | -6.97353100 | 3.40413000  | 0.07884200  |
| C            | -1.96950700 | 1.65658900  | -0.78400100 |
| H            | -1.54251100 | 1.88621400  | -1.75944100 |
| C            | -1.18160800 | 0.98111200  | 0.05297800  |
| C            | 0.23155900  | 0.59912600  | -0.36525300 |
| H            | 0.87659300  | 1.03371000  | 0.44907800  |
| O            | 0.60188400  | 0.90909600  | -1.60838400 |
| H            | -1.49207800 | 0.73767100  | 1.06962600  |
| <b>si-M1</b> |             |             |             |
| C            | 0.36669600  | -0.93894200 | -0.43697700 |
| C            | 1.82428500  | -2.04126200 | 0.78193500  |
| C            | 2.76222600  | -1.12085400 | -1.29778900 |
| H            | 2.36422900  | -0.91074400 | -2.29247800 |
| N            | 0.74333900  | -2.02759500 | 1.50124600  |
| N            | -0.14981700 | -1.32725700 | 0.73079200  |
| N            | 1.63659700  | -1.38967400 | -0.40660300 |
| C            | 3.13994900  | -2.72303000 | 0.97440400  |

|   |             |             |             |
|---|-------------|-------------|-------------|
| H | 3.04770700  | -3.53441600 | 1.69547900  |
| H | 3.90266200  | -2.01564100 | 1.32631700  |
| C | 3.73891000  | -2.35554500 | -1.31798900 |
| O | 3.47688900  | -3.28921500 | -0.28062400 |
| C | 4.95506000  | -0.35141800 | -0.70114100 |
| C | 3.61208700  | 0.01366700  | -0.76352700 |
| C | 3.15975500  | 1.25827600  | -0.34574700 |
| C | 4.12828300  | 2.11929900  | 0.15154800  |
| C | 5.48261800  | 1.79649200  | 0.22689700  |
| C | 5.90258900  | 0.54524000  | -0.20800500 |
| C | 5.15840900  | -1.75122400 | -1.21652000 |
| H | 2.10221800  | 1.52042400  | -0.43677700 |
| H | 6.18156200  | 2.51981000  | 0.62728400  |
| H | 6.95075700  | 0.27193400  | -0.15158500 |
| H | 5.78680700  | -2.36691500 | -0.56691300 |
| H | 5.63249900  | -1.72921900 | -2.20298800 |
| C | -1.45994200 | -1.00768300 | 1.22891400  |
| C | -1.65191700 | 0.26157300  | 1.77471600  |
| C | -2.48374400 | -1.93776700 | 1.04888700  |
| C | -2.95784600 | 0.61010900  | 2.11317800  |
| C | -3.77052100 | -1.54106700 | 1.40480900  |
| C | -4.02665100 | -0.26378300 | 1.90724100  |
| H | -3.14895500 | 1.60241900  | 2.51438300  |
| H | -4.59650500 | -2.23148500 | 1.25258600  |
| C | -2.20412500 | -3.29160200 | 0.45346500  |
| H | -1.44644600 | -3.82863700 | 1.03125700  |
| H | -1.82543100 | -3.20086300 | -0.57077300 |
| H | -3.11282400 | -3.89466900 | 0.42665000  |
| C | -0.50812800 | 1.23108200  | 1.89223500  |
| H | -0.17331300 | 1.51714500  | 0.88458500  |
| H | 0.34179200  | 0.77940900  | 2.41491400  |
| H | -0.81609300 | 2.12300900  | 2.44037800  |
| H | 3.60583900  | -2.92708100 | -2.23609200 |
| C | -5.44000900 | 0.19145000  | 2.14883700  |
| H | -5.49491400 | 0.90567700  | 2.97369200  |
| H | -5.81821000 | 0.68739800  | 1.24677700  |
| H | -6.09991200 | -0.65069200 | 2.36922800  |
| N | 3.70034800  | 3.43998000  | 0.63173400  |
| O | 4.56223100  | 4.21891600  | 1.00517800  |
| O | 2.50757400  | 3.68574900  | 0.63658100  |
| C | -6.13523000 | -0.18375600 | -1.57589400 |
| C | -4.74705000 | -0.23881200 | -1.56401500 |
| C | -3.98067200 | 0.92497300  | -1.39432100 |
| C | -4.65794900 | 2.13891900  | -1.22156900 |

|   |             |             |             |
|---|-------------|-------------|-------------|
| C | -6.04997700 | 2.19813300  | -1.23563500 |
| C | -6.79549600 | 1.03649400  | -1.41739100 |
| H | -6.70805500 | -1.09660200 | -1.70786300 |
| H | -4.25049200 | -1.19879900 | -1.67275700 |
| H | -4.07898900 | 3.04770000  | -1.07988300 |
| H | -6.55039100 | 3.15256200  | -1.10500600 |
| H | -7.87989500 | 1.07685300  | -1.42902700 |
| C | -2.50844700 | 0.91956700  | -1.37411200 |
| H | -2.01367700 | 1.86290100  | -1.14511000 |
| C | -1.70608500 | -0.12371000 | -1.58484600 |
| C | -0.18929400 | 0.02371900  | -1.51428100 |
| H | 0.18227700  | -0.44682700 | -2.46511000 |
| O | 0.29700900  | 1.23685200  | -1.25242900 |
| H | -2.09384600 | -1.11247100 | -1.83484200 |

**re-TS2**

|   |             |             |             |
|---|-------------|-------------|-------------|
| C | -0.02909500 | 0.10417100  | 0.89539800  |
| C | 1.39461700  | 1.38009600  | 1.99644200  |
| C | 2.25476700  | -0.86128200 | 1.61073500  |
| H | 1.83833300  | -1.85030200 | 1.42632700  |
| N | 0.43004300  | 2.18175800  | 1.67789700  |
| N | -0.44731100 | 1.38070600  | 0.98588600  |
| N | 1.16575300  | 0.10668600  | 1.54213300  |
| C | 2.62964900  | 1.59988400  | 2.81044400  |
| H | 2.50510300  | 2.47109500  | 3.45343200  |
| H | 3.49878300  | 1.76160200  | 2.15908100  |
| C | 2.97888500  | -0.78068100 | 2.99109400  |
| O | 2.79233000  | 0.46787000  | 3.64605000  |
| C | 4.60314400  | -0.69077700 | 1.20084400  |
| C | 3.34580400  | -0.53414900 | 0.61633300  |
| C | 3.19433900  | -0.12051900 | -0.69755900 |
| C | 4.36165800  | 0.05324900  | -1.42676500 |
| C | 5.63489700  | -0.13690200 | -0.89576800 |
| C | 5.75875400  | -0.49654600 | 0.44504200  |
| C | 4.46308100  | -1.05617400 | 2.65853400  |
| H | 2.22473500  | 0.02345300  | -1.16881800 |
| H | 6.50328600  | 0.01772100  | -1.52509800 |
| H | 6.74178200  | -0.60847400 | 0.89049200  |
| H | 5.11632800  | -0.47302300 | 3.31289300  |
| H | 4.69411500  | -2.11514300 | 2.81890700  |
| C | -1.56409800 | 1.98420200  | 0.31714400  |
| C | -1.39003500 | 2.36718700  | -1.01425900 |
| C | -2.76893400 | 2.12592600  | 1.00972900  |
| C | -2.49693300 | 2.91178800  | -1.66783400 |
| C | -3.84108700 | 2.67859800  | 0.31485200  |

|    |             |             |             |
|----|-------------|-------------|-------------|
| C  | -3.72336400 | 3.07164100  | -1.02255100 |
| H  | -2.39645400 | 3.21170700  | -2.70761900 |
| H  | -4.79642800 | 2.79088500  | 0.82233100  |
| C  | -2.90941500 | 1.62053400  | 2.41912500  |
| H  | -2.09484700 | 1.97745400  | 3.05516300  |
| H  | -2.88130500 | 0.52404800  | 2.42637300  |
| H  | -3.85836400 | 1.94163300  | 2.85117900  |
| C  | -0.07727300 | 2.15551500  | -1.72211100 |
| H  | 0.06675000  | 1.10169900  | -1.99652600 |
| H  | 0.76530400  | 2.45348300  | -1.08974400 |
| H  | -0.04076800 | 2.74661900  | -2.63870400 |
| H  | 2.57488800  | -1.51881300 | 3.68449100  |
| C  | -4.90398000 | 3.67081400  | -1.74079100 |
| H  | -4.75509700 | 3.66402600  | -2.82211500 |
| H  | -5.82004500 | 3.11937400  | -1.51322100 |
| H  | -5.05934800 | 4.70824900  | -1.42793500 |
| N  | 4.24316900  | 0.45626500  | -2.83059800 |
| O  | 3.24307100  | 1.05933600  | -3.16266700 |
| O  | 5.16945800  | 0.17665300  | -3.57420100 |
| C  | -6.49473800 | -0.98882800 | -0.30748400 |
| C  | -5.11912700 | -0.90526800 | -0.12911200 |
| C  | -4.36198900 | -2.04913200 | 0.17093300  |
| C  | -5.03754300 | -3.26912500 | 0.30761500  |
| C  | -6.41557600 | -3.35400000 | 0.13059900  |
| C  | -7.15132600 | -2.21359700 | -0.18155500 |
| H  | -7.06013500 | -0.09128100 | -0.54029000 |
| H  | -4.62902600 | 0.06171200  | -0.21080300 |
| H  | -4.46729300 | -4.16197800 | 0.55020000  |
| H  | -6.91422600 | -4.31246900 | 0.23727300  |
| H  | -8.22599900 | -2.27515000 | -0.31961300 |
| C  | -2.90275700 | -2.01231100 | 0.36194600  |
| H  | -2.44453400 | -2.89604800 | 0.79915700  |
| C  | -2.10240700 | -0.99521600 | 0.02018300  |
| C  | -0.61814800 | -1.04205500 | 0.18327400  |
| H  | -0.10985400 | -0.99477500 | -0.97404600 |
| O  | -0.15417400 | -2.24792700 | 0.72139300  |
| H  | -2.51869900 | -0.12301600 | -0.47581800 |
| H  | 0.53623100  | -2.57745800 | 0.00071100  |
| C  | 1.54209600  | -2.04012500 | -2.03908000 |
| O  | 2.44573200  | -2.12683400 | -2.90938200 |
| O  | 0.55588100  | -1.18944400 | -2.17408900 |
| O  | 1.59457100  | -2.75896700 | -0.94522600 |
| Cs | 4.44567600  | -3.67465800 | -1.34490500 |

**si-TS2**

|   |             |             |             |
|---|-------------|-------------|-------------|
| C | -0.27850200 | -0.90139000 | -0.18046400 |
| C | -1.73920100 | -1.73943400 | -1.59272700 |
| C | -2.73736900 | -0.92118000 | 0.50714100  |
| H | -2.38587100 | -0.85025100 | 1.53862600  |
| N | -0.60792100 | -1.81277600 | -2.22309100 |
| N | 0.29418400  | -1.26847900 | -1.33879700 |
| N | -1.58827100 | -1.19372500 | -0.34873000 |
| C | -3.10102300 | -2.24551200 | -1.93815600 |
| H | -3.04290800 | -2.98080400 | -2.73996600 |
| H | -3.75562300 | -1.42146500 | -2.25406100 |
| C | -3.81217400 | -2.05395300 | 0.34379200  |
| O | -3.58882400 | -2.89625400 | -0.77924200 |
| C | -4.81755700 | 0.11014300  | -0.09537700 |
| C | -3.45109900 | 0.33701200  | 0.06422600  |
| C | -2.88198800 | 1.57792300  | -0.18219000 |
| C | -3.74296700 | 2.57971000  | -0.61172200 |
| C | -5.11303400 | 2.39078400  | -0.78303500 |
| C | -5.65797200 | 1.13961200  | -0.51736700 |
| C | -5.16710800 | -1.31341500 | 0.25071300  |
| H | -1.82340200 | 1.75583500  | -0.02228700 |
| H | -5.72640300 | 3.21518400  | -1.12368200 |
| H | -6.72135500 | 0.97050300  | -0.64897600 |
| H | -5.81345600 | -1.79371900 | -0.48918000 |
| H | -5.68728200 | -1.35211600 | 1.21327700  |
| C | 1.62212700  | -0.94981600 | -1.77872600 |
| C | 1.94817900  | 0.40115600  | -1.94639800 |
| C | 2.52408400  | -1.99045900 | -2.00265000 |
| C | 3.25334400  | 0.69471500  | -2.33388100 |
| C | 3.81566600  | -1.64271400 | -2.40145800 |
| C | 4.19829700  | -0.30978700 | -2.55821300 |
| H | 3.54176100  | 1.73531900  | -2.45973400 |
| H | 4.54095900  | -2.43278300 | -2.57789600 |
| C | 2.11630400  | -3.42480200 | -1.79892300 |
| H | 1.34036900  | -3.71680100 | -2.51187100 |
| H | 1.70565300  | -3.57619500 | -0.79530600 |
| H | 2.97306300  | -4.08810900 | -1.92467000 |
| C | 0.93927400  | 1.49165800  | -1.69531200 |
| H | 0.76968000  | 1.62855200  | -0.62013700 |
| H | -0.02426200 | 1.25707300  | -2.16032800 |
| H | 1.29451400  | 2.43810600  | -2.10575700 |
| H | -3.76886200 | -2.72638300 | 1.20040200  |
| C | 5.61478000  | 0.05402100  | -2.91625900 |
| H | 5.64135100  | 0.82061900  | -3.69487200 |

|    |             |             |             |
|----|-------------|-------------|-------------|
| H  | 6.12873900  | 0.46020900  | -2.03833400 |
| H  | 6.17454700  | -0.81585800 | -3.26520900 |
| N  | -3.17723800 | 3.90161700  | -0.90420800 |
| O  | -3.94463500 | 4.79341100  | -1.22412100 |
| O  | -1.96943100 | 4.03632200  | -0.81510200 |
| C  | 6.12009700  | 0.25269600  | 1.02367500  |
| C  | 4.74159300  | 0.09683400  | 0.93289600  |
| C  | 3.87401600  | 0.90945200  | 1.68146300  |
| C  | 4.43972900  | 1.89914600  | 2.49711000  |
| C  | 5.81989000  | 2.06025900  | 2.58391000  |
| C  | 6.66819300  | 1.23450600  | 1.85050000  |
| H  | 6.77153400  | -0.39099500 | 0.43955400  |
| H  | 4.33111600  | -0.64906700 | 0.25750300  |
| H  | 3.78237100  | 2.54584100  | 3.07252300  |
| H  | 6.23274000  | 2.83243300  | 3.22571300  |
| H  | 7.74437500  | 1.35769200  | 1.91508300  |
| C  | 2.41167500  | 0.77418300  | 1.61113100  |
| H  | 1.81954600  | 1.60547300  | 1.98797900  |
| C  | 1.75596900  | -0.28476600 | 1.11775400  |
| C  | 0.27999200  | -0.39392200 | 1.07868500  |
| H  | -0.12241400 | -1.31148900 | 1.88357500  |
| O  | -0.42167300 | 0.75117000  | 1.48573300  |
| H  | 2.30894900  | -1.15689300 | 0.77107100  |
| H  | -0.90731400 | 0.44890100  | 2.37315800  |
| C  | -1.37779900 | -1.41067300 | 3.70365800  |
| O  | -1.79078800 | -1.95270500 | 4.75758200  |
| O  | -0.79047300 | -2.10954300 | 2.76478900  |
| O  | -1.54067300 | -0.12306800 | 3.50592600  |
| Cs | -2.13943900 | 0.54069700  | 6.38813400  |

***re-TS2<sup>A</sup>***

|   |             |             |            |
|---|-------------|-------------|------------|
| C | -0.03547000 | 0.13367900  | 0.95511200 |
| C | 1.41614700  | 1.43027800  | 2.00406900 |
| C | 2.24773900  | -0.82967200 | 1.65869400 |
| H | 1.80155400  | -1.81171300 | 1.49699500 |
| N | 0.45953600  | 2.23641300  | 1.67379100 |
| N | -0.43872100 | 1.42359700  | 1.01494700 |
| N | 1.16670400  | 0.14726500  | 1.59407400 |
| C | 2.66421600  | 1.65521100  | 2.79716700 |
| H | 2.55822900  | 2.54165500  | 3.42283100 |
| H | 3.52623300  | 1.79207800  | 2.13085300 |
| C | 2.99696200  | -0.72626400 | 3.02259100 |
| O | 2.82826400  | 0.54008600  | 3.65592800 |
| C | 4.58947900  | -0.66323600 | 1.20701200 |
| C | 3.32295000  | -0.52437700 | 0.63984400 |

|   |             |             |             |
|---|-------------|-------------|-------------|
| C | 3.15217800  | -0.13215800 | -0.67754500 |
| C | 4.30899400  | 0.04775100  | -1.42251700 |
| C | 5.58930300  | -0.12889300 | -0.90657700 |
| C | 5.73219800  | -0.47269700 | 0.43437100  |
| C | 4.47359900  | -1.01240100 | 2.67054500  |
| H | 2.17573100  | 0.00366600  | -1.13579400 |
| H | 6.44799200  | 0.02402100  | -1.54861100 |
| H | 6.72132800  | -0.58012900 | 0.86705900  |
| H | 5.14074200  | -0.42897700 | 3.31075100  |
| H | 4.69953000  | -2.07203400 | 2.83230600  |
| C | -1.54772600 | 2.02566600  | 0.33687200  |
| C | -1.36940400 | 2.39862500  | -0.99751600 |
| C | -2.75504400 | 2.18021800  | 1.02170900  |
| C | -2.46927500 | 2.94837800  | -1.65766200 |
| C | -3.82269500 | 2.73484000  | 0.32018300  |
| C | -3.69708600 | 3.12153600  | -1.01758000 |
| H | -2.36354300 | 3.24083300  | -2.69928300 |
| H | -4.77874900 | 2.85626800  | 0.82421700  |
| C | -2.90224700 | 1.68311900  | 2.43348400  |
| H | -2.08973600 | 2.04369900  | 3.07007600  |
| H | -2.87161600 | 0.58672900  | 2.44769400  |
| H | -3.85342900 | 2.00559800  | 2.85995600  |
| C | -0.05648100 | 2.16949000  | -1.69944900 |
| H | 0.07853100  | 1.11124200  | -1.96055000 |
| H | 0.78647200  | 2.46435900  | -1.06631500 |
| H | -0.01104200 | 2.75020900  | -2.62240900 |
| H | 2.60158800  | -1.44567800 | 3.74028800  |
| C | -4.86486000 | 3.73530600  | -1.74526000 |
| H | -4.78117200 | 3.58525800  | -2.82359500 |
| H | -5.80972200 | 3.30336300  | -1.40661300 |
| H | -4.90991500 | 4.81356900  | -1.56051900 |
| N | 4.17241500  | 0.46717600  | -2.81909500 |
| O | 3.13556900  | 1.01052100  | -3.15222300 |
| O | 5.11839900  | 0.27405000  | -3.56587400 |
| C | -6.48154600 | -1.07457800 | -0.31846800 |
| C | -5.11014200 | -0.97199000 | -0.12018800 |
| C | -4.32936100 | -2.11227200 | 0.13460700  |
| C | -4.98416100 | -3.35030500 | 0.20306700  |
| C | -6.35816900 | -3.45429300 | 0.00721900  |
| C | -7.11538200 | -2.31620900 | -0.25819000 |
| H | -7.06194900 | -0.17800900 | -0.51648300 |
| H | -4.64055700 | 0.00831300  | -0.15308400 |
| H | -4.39850800 | -4.24260600 | 0.40840300  |
| H | -6.83755900 | -4.42712900 | 0.06241000  |

|   |             |             |             |
|---|-------------|-------------|-------------|
| H | -8.18712000 | -2.39280500 | -0.41141400 |
| C | -2.87523700 | -2.05579400 | 0.34688400  |
| H | -2.39111800 | -2.95774900 | 0.71388600  |
| C | -2.09487300 | -0.99286700 | 0.10744800  |
| C | -0.61483200 | -1.03676800 | 0.28951100  |
| H | -0.13953500 | -0.95577800 | -0.89735500 |
| O | -0.11516800 | -2.22506400 | 0.77367400  |
| H | -2.52569500 | -0.09106800 | -0.31926500 |
| H | 0.71766100  | -2.59084300 | -0.15981600 |
| C | 1.44826900  | -2.07136300 | -2.02035900 |
| O | 2.30239800  | -2.20675600 | -2.90727000 |
| O | 0.46722700  | -1.21037700 | -2.10288400 |
| O | 1.52925800  | -2.79561500 | -0.90724000 |

**si-TS2<sup>A</sup>**

|   |             |             |             |
|---|-------------|-------------|-------------|
| C | -0.27761500 | -0.95334700 | -0.12612700 |
| C | -1.75566500 | -1.83693100 | -1.49939800 |
| C | -2.73561500 | -0.91710600 | 0.57025900  |
| H | -2.38191300 | -0.84890900 | 1.59828800  |
| N | -0.63398900 | -1.93749800 | -2.14106200 |
| N | 0.28215800  | -1.36361300 | -1.28252900 |
| N | -1.59394100 | -1.25158100 | -0.27514700 |
| C | -3.12368100 | -2.33199700 | -1.83423000 |
| H | -3.07119500 | -3.10799200 | -2.59771700 |
| H | -3.75669700 | -1.51167400 | -2.20190200 |
| C | -3.86769100 | -1.99589200 | 0.41257100  |
| O | -3.64570400 | -2.91104600 | -0.65289100 |
| C | -4.74166000 | 0.20720500  | -0.12223300 |
| C | -3.37635600 | 0.36981900  | 0.10133500  |
| C | -2.73224400 | 1.57845000  | -0.12306100 |
| C | -3.51941100 | 2.61286800  | -0.61073900 |
| C | -4.88768500 | 2.48977700  | -0.84890400 |
| C | -5.50820300 | 1.27236100  | -0.59535100 |
| C | -5.17781700 | -1.19279400 | 0.22211100  |
| H | -1.67663800 | 1.69429000  | 0.11436000  |
| H | -5.44051800 | 3.33943800  | -1.22939100 |
| H | -6.57177500 | 1.15574200  | -0.77524900 |
| H | -5.79834700 | -1.65563400 | -0.55117800 |
| H | -5.76082000 | -1.19129500 | 1.14852000  |
| C | 1.58197300  | -1.00433100 | -1.76712600 |
| C | 1.86331500  | 0.35656200  | -1.94278000 |
| C | 2.51197800  | -2.01422400 | -2.01435200 |
| C | 3.14851900  | 0.69005800  | -2.36292500 |
| C | 3.78223700  | -1.62734800 | -2.44512900 |

|   |             |             |             |
|---|-------------|-------------|-------------|
| C | 4.11967300  | -0.28383600 | -2.60943000 |
| H | 3.40142200  | 1.73954900  | -2.49397500 |
| H | 4.52883400  | -2.39461200 | -2.63454300 |
| C | 2.15630500  | -3.46000300 | -1.79454800 |
| H | 1.39193800  | -3.78919900 | -2.50414100 |
| H | 1.74909200  | -3.61218900 | -0.78979100 |
| H | 3.03661300  | -4.09403800 | -1.91119800 |
| C | 0.83067700  | 1.41816900  | -1.66310300 |
| H | 0.68923900  | 1.55538300  | -0.58324800 |
| H | -0.14062200 | 1.15209700  | -2.09517300 |
| H | 1.14295900  | 2.37316700  | -2.08937100 |
| H | -3.90009500 | -2.62309300 | 1.30313300  |
| C | 5.51721500  | 0.12526600  | -2.99383400 |
| H | 5.50532000  | 0.88773200  | -3.77722900 |
| H | 6.03170800  | 0.55381000  | -2.12657800 |
| H | 6.10023100  | -0.72766100 | -3.34733300 |
| N | -2.87497000 | 3.89871200  | -0.89997300 |
| O | -3.58423600 | 4.83274200  | -1.23784600 |
| O | -1.66243400 | 3.96577000  | -0.79632600 |
| C | 6.11705400  | 0.38087300  | 0.94474000  |
| C | 4.74258900  | 0.18180400  | 0.88302700  |
| C | 3.86506100  | 0.95159000  | 1.66612500  |
| C | 4.42011500  | 1.94473200  | 2.48589400  |
| C | 5.79560300  | 2.14994800  | 2.54273700  |
| C | 6.65356300  | 1.36571100  | 1.77558200  |
| H | 6.77423200  | -0.23154400 | 0.33339600  |
| H | 4.33970300  | -0.56324000 | 0.20191800  |
| H | 3.75644600  | 2.55803200  | 3.08992100  |
| H | 6.19779900  | 2.92325500  | 3.19036800  |
| H | 7.72659600  | 1.52304100  | 1.81764400  |
| C | 2.40740700  | 0.77358400  | 1.62505800  |
| H | 1.79343600  | 1.56800200  | 2.04380400  |
| C | 1.76715900  | -0.28502200 | 1.10763600  |
| C | 0.29243100  | -0.41151000 | 1.10297200  |
| H | -0.04911000 | -1.38863200 | 1.88766500  |
| O | -0.43748200 | 0.65559800  | 1.59019500  |
| H | 2.33260100  | -1.13199100 | 0.71935600  |
| H | -0.93504100 | 0.20636500  | 2.72806100  |
| C | -1.26289900 | -1.54608000 | 3.75821900  |
| O | -1.69466800 | -2.12110500 | 4.76512400  |
| O | -0.70859300 | -2.18040000 | 2.76025900  |
| O | -1.38040500 | -0.22036800 | 3.65305800  |

*re-M2*

|   |             |             |             |
|---|-------------|-------------|-------------|
| C | 0.40336500  | 0.84127300  | 0.85148400  |
| C | 2.03987200  | 2.24695400  | 0.28460700  |
| C | 2.81634600  | 0.34625000  | 1.63253200  |
| H | 2.42362700  | -0.18222400 | 2.49883800  |
| N | 1.02533500  | 2.69611800  | -0.36451600 |
| N | -0.01397700 | 1.83814800  | -0.01792800 |
| N | 1.74252900  | 1.15824500  | 1.07173700  |
| C | 3.44206800  | 2.75875300  | 0.32219900  |
| H | 3.46603900  | 3.82091800  | 0.07941400  |
| H | 4.06910400  | 2.21768600  | -0.40206900 |
| C | 4.04729000  | 1.24087100  | 2.03996200  |
| O | 3.92078900  | 2.59503600  | 1.64338000  |
| C | 4.75243200  | -0.47696700 | 0.46438700  |
| C | 3.37117700  | -0.60787100 | 0.60044700  |
| C | 2.64498000  | -1.48764300 | -0.18851600 |
| C | 3.35803400  | -2.22677100 | -1.12344800 |
| C | 4.73864100  | -2.12846800 | -1.27914900 |
| C | 5.44453200  | -1.24275900 | -0.47280300 |
| C | 5.29183600  | 0.55307100  | 1.42053200  |
| H | 1.56873400  | -1.58808000 | -0.10546100 |
| H | 5.23511600  | -2.73216200 | -2.02825700 |
| H | 6.51908500  | -1.14476600 | -0.58602800 |
| H | 5.93214900  | 1.29355400  | 0.93100300  |
| H | 5.89268400  | 0.07570600  | 2.20078800  |
| C | -1.17899400 | 1.82647000  | -0.84059500 |
| C | -1.30878400 | 0.85712200  | -1.84419800 |
| C | -2.17474400 | 2.77594500  | -0.58931100 |
| C | -2.49313900 | 0.83887200  | -2.57995300 |
| C | -3.33724700 | 2.72687500  | -1.35751000 |
| C | -3.51660400 | 1.76097200  | -2.34990600 |
| H | -2.61965500 | 0.08370100  | -3.35245500 |
| H | -4.12589200 | 3.45080500  | -1.16760300 |
| C | -1.99209800 | 3.78796700  | 0.50925700  |
| H | -1.10285800 | 4.39963700  | 0.33221600  |
| H | -1.85114400 | 3.28766800  | 1.47274000  |
| H | -2.86158700 | 4.44344900  | 0.58072900  |
| C | -0.23713400 | -0.17242600 | -2.08184000 |
| H | -0.34094100 | -1.00454900 | -1.37593800 |
| H | 0.76341300  | 0.25108400  | -1.94908900 |
| H | -0.31120200 | -0.58131000 | -3.09129600 |
| H | 4.12170100  | 1.28446800  | 3.12628600  |
| C | -4.77993300 | 1.71992600  | -3.17061200 |
| H | -5.08942500 | 0.68930900  | -3.36263300 |
| H | -5.59705500 | 2.23805000  | -2.66423200 |

|   |             |             |             |
|---|-------------|-------------|-------------|
| H | -4.62805200 | 2.20302900  | -4.14126500 |
| N | 2.61524100  | -3.14326900 | -1.99516300 |
| O | 1.40220700  | -3.18540800 | -1.87384700 |
| O | 3.24686500  | -3.81052500 | -2.79549100 |
| C | -5.92703000 | -1.21598300 | 0.32484700  |
| C | -4.57038100 | -0.98675400 | 0.51485200  |
| C | -3.86741400 | -1.61899300 | 1.55790300  |
| C | -4.58129500 | -2.50833100 | 2.37738500  |
| C | -5.93841900 | -2.74290100 | 2.18168600  |
| C | -6.62303300 | -2.09382900 | 1.15652300  |
| H | -6.44363100 | -0.71316600 | -0.48771300 |
| H | -4.04769800 | -0.32241000 | -0.16945300 |
| H | -4.05745300 | -3.01533900 | 3.18381900  |
| H | -6.46361500 | -3.43425500 | 2.83396300  |
| H | -7.68156100 | -2.27490600 | 1.00106100  |
| C | -2.44241900 | -1.39182100 | 1.80674400  |
| H | -1.96789400 | -2.06083200 | 2.52178600  |
| C | -1.72172300 | -0.39821800 | 1.23568700  |
| C | -0.32025700 | -0.18159100 | 1.42029600  |
| O | 0.37881400  | -1.05808100 | 2.25190300  |
| H | -2.23720200 | 0.29933300  | 0.58560400  |
| H | 0.22238300  | -1.95723100 | 1.92785900  |

**si-M2**

|   |             |             |             |
|---|-------------|-------------|-------------|
| C | 0.41196500  | -0.89165100 | -0.83966300 |
| C | 2.03818200  | -2.28307700 | -0.21531800 |
| C | 2.83093900  | -0.41744400 | -1.61148100 |
| H | 2.44481700  | 0.07886200  | -2.49917300 |
| N | 1.01467100  | -2.71565900 | 0.43133300  |
| N | -0.01835800 | -1.86186600 | 0.05362700  |
| N | 1.75420600  | -1.21258400 | -1.03189300 |
| C | 3.43843900  | -2.80041000 | -0.22864100 |
| H | 3.45784500  | -3.85604500 | 0.04097300  |
| H | 4.06189500  | -2.24239700 | 0.48533400  |
| C | 4.06567100  | -1.32686100 | -1.97484700 |
| O | 3.92653500  | -2.67115600 | -1.55034100 |
| C | 4.75391300  | 0.43619600  | -0.44313600 |
| C | 3.37708300  | 0.57757000  | -0.61135000 |
| C | 2.64755400  | 1.50444400  | 0.12114500  |
| C | 3.35486100  | 2.27035100  | 1.03887300  |
| C | 4.73063300  | 2.15855100  | 1.22931400  |
| C | 5.43950000  | 1.23134200  | 0.47490500  |
| C | 5.30299400  | -0.63267100 | -1.34947800 |
| H | 1.57932400  | 1.63478800  | -0.01040600 |

|   |             |             |             |
|---|-------------|-------------|-------------|
| H | 5.22020100  | 2.78757000  | 1.96178400  |
| H | 6.51038900  | 1.12467500  | 0.61143600  |
| H | 5.92183300  | -1.36317200 | -0.81911800 |
| H | 5.92922300  | -0.19017900 | -2.13003700 |
| C | -1.18645100 | -1.80241800 | 0.86956200  |
| C | -1.32258700 | -0.77391000 | 1.81163300  |
| C | -2.18142700 | -2.76537900 | 0.66969700  |
| C | -2.51586900 | -0.70697700 | 2.53032000  |
| C | -3.35223600 | -2.66605600 | 1.42057900  |
| C | -3.54259500 | -1.63421000 | 2.34232800  |
| H | -2.64532900 | 0.09071600  | 3.25829800  |
| H | -4.13778800 | -3.40314700 | 1.27281900  |
| C | -1.98736900 | -3.85011800 | -0.35523700 |
| H | -1.10616500 | -4.45469400 | -0.12312700 |
| H | -1.82492800 | -3.41648900 | -1.34736100 |
| H | -2.86053700 | -4.50305800 | -0.39900800 |
| C | -0.24544400 | 0.25734100  | 2.01570600  |
| H | -0.35381100 | 1.07519900  | 1.29446000  |
| H | 0.75290200  | -0.17080300 | 1.88205600  |
| H | -0.30850900 | 0.68503900  | 3.01823000  |
| H | 4.15889200  | -1.39506200 | -3.05837500 |
| C | -4.83886100 | -1.50066500 | 3.09909300  |
| H | -4.66219700 | -1.20477100 | 4.13611600  |
| H | -5.46997800 | -0.73079200 | 2.64261700  |
| H | -5.39911300 | -2.43788100 | 3.09641100  |
| N | 2.61199000  | 3.23768700  | 1.85471500  |
| O | 3.24521900  | 3.95314700  | 2.61183600  |
| O | 1.39903100  | 3.27104700  | 1.73567600  |
| C | -6.01472100 | 0.92603500  | -0.61709400 |
| C | -4.64206900 | 0.73541200  | -0.71464000 |
| C | -3.84639900 | 1.59277000  | -1.49775800 |
| C | -4.48602300 | 2.65848100  | -2.15136500 |
| C | -5.85981500 | 2.85188800  | -2.04843400 |
| C | -6.63535800 | 1.98329000  | -1.28403100 |
| H | -6.60570000 | 0.24907700  | -0.00706000 |
| H | -4.18094700 | -0.07786400 | -0.15908900 |
| H | -3.88891600 | 3.33945900  | -2.75252100 |
| H | -6.32569000 | 3.68362600  | -2.56817300 |
| H | -7.70711600 | 2.13093800  | -1.20124000 |
| C | -2.39826500 | 1.42673900  | -1.63889000 |
| H | -1.85969000 | 2.26213300  | -2.08142400 |
| C | -1.71279000 | 0.32699600  | -1.25150500 |
| C | -0.30024900 | 0.14112600  | -1.39681100 |
| O | 0.43102500  | 1.11425400  | -2.07857600 |

|   |             |             |             |
|---|-------------|-------------|-------------|
| H | -2.26449300 | -0.50852700 | -0.83358100 |
| H | 0.07231300  | 1.18130100  | -2.97493300 |

**re-TS2<sup>D</sup>**

|   |             |             |             |
|---|-------------|-------------|-------------|
| C | 0.43988400  | -0.95522800 | -0.29813300 |
| C | 1.56583000  | -2.84742900 | -0.18820700 |
| C | 2.89490700  | -0.90035300 | -1.08115900 |
| H | 2.67873300  | -0.61399200 | -2.10954900 |
| N | 0.38677500  | -3.14924600 | 0.25141500  |
| N | -0.31320600 | -1.96919200 | 0.18091600  |
| N | 1.66866900  | -1.51622000 | -0.52412700 |
| C | 2.70121300  | -3.80683800 | -0.37495100 |
| H | 2.32183500  | -4.72329300 | -0.82908000 |
| H | 3.14572000  | -4.06503500 | 0.59382300  |
| C | 4.03586800  | -1.94593500 | -0.93703500 |
| O | 3.65244100  | -3.25986700 | -1.25997600 |
| C | 4.41980200  | -0.24237500 | 0.64670800  |
| C | 3.45747700  | 0.24015100  | -0.25051200 |
| C | 3.22867200  | 1.60394100  | -0.37752900 |
| C | 3.93635900  | 2.44414400  | 0.47446200  |
| C | 4.85957800  | 1.98764100  | 1.40923300  |
| C | 5.11444300  | 0.62306000  | 1.48557200  |
| C | 4.60286400  | -1.72494600 | 0.48354500  |
| H | 2.54746700  | 2.00545200  | -1.12056500 |
| H | 5.37882500  | 2.69889900  | 2.03907900  |
| H | 5.86001200  | 0.24510300  | 2.17661300  |
| H | 4.02701600  | -2.26267200 | 1.24532400  |
| H | 5.64323800  | -2.04430500 | 0.56830600  |
| C | -1.74426900 | -1.99725700 | 0.27015200  |
| C | -2.33576500 | -2.15518300 | 1.52336800  |
| C | -2.48007900 | -1.83549600 | -0.91023300 |
| C | -3.72996900 | -2.12938300 | 1.58430800  |
| C | -3.86740300 | -1.80475100 | -0.79401400 |
| C | -4.50693600 | -1.93874900 | 0.44133900  |
| H | -4.21569900 | -2.24427000 | 2.55008500  |
| H | -4.46580000 | -1.66629300 | -1.69134400 |
| C | -1.79923100 | -1.68224100 | -2.24604800 |
| H | -1.02083400 | -2.44081100 | -2.37883500 |
| H | -1.32685900 | -0.69715900 | -2.34770800 |
| H | -2.52548500 | -1.79550400 | -3.05258700 |
| C | -1.49056500 | -2.32241000 | 2.75731400  |
| H | -0.78200400 | -1.49393500 | 2.85967900  |
| H | -0.90383000 | -3.24416400 | 2.70892700  |
| H | -2.11605700 | -2.35367500 | 3.65051300  |

|   |             |             |             |
|---|-------------|-------------|-------------|
| H | 4.80348100  | -1.67530200 | -1.66580700 |
| C | -6.00573900 | -1.82573000 | 0.53108000  |
| H | -6.37847000 | -2.19644600 | 1.48800100  |
| H | -6.30641700 | -0.77672700 | 0.43213900  |
| H | -6.49397700 | -2.38254200 | -0.27270900 |
| N | 3.71151900  | 3.89144600  | 0.36803600  |
| O | 4.33755400  | 4.62143100  | 1.11745900  |
| O | 2.91268400  | 4.28464400  | -0.46299700 |
| C | -5.32679100 | 2.11616900  | 0.87800200  |
| C | -4.07933700 | 1.62125800  | 0.51754300  |
| C | -3.27751500 | 2.29527700  | -0.41961700 |
| C | -3.78982100 | 3.46478200  | -0.99977900 |
| C | -5.04221000 | 3.95732800  | -0.64386200 |
| C | -5.81669200 | 3.28837100  | 0.30065600  |
| H | -5.92490500 | 1.57929300  | 1.60901100  |
| H | -3.73016700 | 0.68808500  | 0.95199800  |
| H | -3.18984700 | 3.99415400  | -1.73551900 |
| H | -5.41328600 | 4.86771500  | -1.10485400 |
| H | -6.79345900 | 3.67008400  | 0.57981300  |
| C | -1.95366500 | 1.79839000  | -0.81825900 |
| H | -1.51840500 | 2.20116000  | -1.72967900 |
| C | -1.24602800 | 0.88389500  | -0.13369100 |
| C | 0.06070300  | 0.39616300  | -0.56174000 |
| H | 0.96289700  | 1.15941200  | -0.55877000 |
| O | 0.62639900  | 0.93315800  | -1.79576600 |
| H | -1.62613700 | 0.49672300  | 0.80917500  |

**si-TS2<sup>D</sup>**

|   |            |             |             |
|---|------------|-------------|-------------|
| C | 0.87771000 | -1.17209200 | -0.74691200 |
| C | 2.64584000 | -2.26921200 | -0.02220900 |
| C | 3.12177600 | -0.03368200 | -1.07512900 |
| H | 2.99869300 | 0.16701300  | -2.13794500 |
| N | 1.64004400 | -2.94430900 | 0.43620900  |
| N | 0.53874100 | -2.25428800 | -0.00937500 |
| N | 2.24055800 | -1.16626800 | -0.73551300 |
| C | 4.10314100 | -2.59541200 | 0.11195400  |
| H | 4.27327000 | -3.62916200 | -0.19430100 |
| H | 4.42091200 | -2.49661900 | 1.15647600  |
| C | 4.57714400 | -0.39847500 | -0.65716400 |
| O | 4.85812800 | -1.77937300 | -0.75670500 |
| C | 3.76587800 | 1.31585800  | 0.80357500  |
| C | 2.81665100 | 1.17238500  | -0.21091900 |
| C | 1.75291800 | 2.05540100  | -0.33892100 |
| C | 1.67865700 | 3.07860200  | 0.59739800  |

|   |             |             |             |
|---|-------------|-------------|-------------|
| C | 2.60513600  | 3.24900600  | 1.62362200  |
| C | 3.66678500  | 2.35784500  | 1.72333100  |
| C | 4.80781800  | 0.23344200  | 0.73655200  |
| H | 1.03325900  | 1.94562400  | -1.14887500 |
| H | 2.48846900  | 4.07013700  | 2.31955000  |
| H | 4.40652900  | 2.47831900  | 2.50753400  |
| H | 4.64990800  | -0.48728100 | 1.54612400  |
| H | 5.82598100  | 0.61396400  | 0.84228300  |
| C | -0.78258000 | -2.66916500 | 0.35165300  |
| C | -1.28744800 | -2.24094100 | 1.58471400  |
| C | -1.52522300 | -3.42207100 | -0.55625500 |
| C | -2.59783400 | -2.58903500 | 1.89702400  |
| C | -2.83601400 | -3.74573200 | -0.19989200 |
| C | -3.38579900 | -3.33672600 | 1.01454400  |
| H | -3.02006900 | -2.26076900 | 2.84380900  |
| H | -3.43987900 | -4.32776500 | -0.89121200 |
| C | -0.92754500 | -3.83952300 | -1.87192700 |
| H | 0.01174200  | -4.37933200 | -1.72021100 |
| H | -0.70564400 | -2.95883700 | -2.48394600 |
| H | -1.61454200 | -4.48108600 | -2.42530100 |
| C | -0.44395300 | -1.39233400 | 2.49789100  |
| H | -0.14256500 | -0.46554600 | 1.99506300  |
| H | 0.47090600  | -1.91689300 | 2.78868900  |
| H | -0.99732200 | -1.12761200 | 3.39977000  |
| H | 5.24476800  | 0.07781300  | -1.37748000 |
| C | -4.80375700 | -3.68810700 | 1.38336500  |
| H | -4.82591500 | -4.33264400 | 2.26707500  |
| H | -5.37654000 | -2.78755300 | 1.62273200  |
| H | -5.30876200 | -4.20935400 | 0.56822300  |
| N | 0.57263300  | 4.03842000  | 0.49193400  |
| O | 0.44945500  | 4.86770300  | 1.37878700  |
| O | -0.16318000 | 3.95859500  | -0.47566500 |
| C | -5.19903100 | 1.56880600  | 0.25449600  |
| C | -4.01500700 | 1.02800600  | -0.23278000 |
| C | -3.08469000 | 1.82838000  | -0.91599300 |
| C | -3.39820200 | 3.18095100  | -1.11283100 |
| C | -4.58490000 | 3.72173300  | -0.62763700 |
| C | -5.49105300 | 2.91914300  | 0.06171500  |
| H | -5.90433300 | 0.93030400  | 0.77829800  |
| H | -3.81750400 | -0.03251400 | -0.09732100 |
| H | -2.68780800 | 3.81214700  | -1.63926300 |
| H | -4.80193300 | 4.77333100  | -0.78852300 |
| H | -6.41870500 | 3.33736900  | 0.43898600  |
| C | -1.81356400 | 1.30081300  | -1.42938600 |

|   |             |             |             |
|---|-------------|-------------|-------------|
| H | -1.29534600 | 1.88886000  | -2.18312800 |
| C | -1.23176600 | 0.16932500  | -1.00039500 |
| C | 0.03775000  | -0.31941400 | -1.54842500 |
| H | 0.09531700  | -0.66842300 | -2.67918800 |
| O | 0.71789800  | 0.49819300  | -2.51502000 |
| H | -1.69819200 | -0.41597200 | -0.21223700 |

**re-TS2<sup>W</sup>**

|   |             |             |             |
|---|-------------|-------------|-------------|
| C | 0.38143400  | -0.90180700 | -0.32697300 |
| C | 1.37648900  | -2.84823100 | -0.57634600 |
| C | 2.80270500  | -0.90247900 | -1.27602200 |
| H | 2.56418000  | -0.49850900 | -2.25908800 |
| N | 0.21010000  | -3.13587400 | -0.09329200 |
| N | -0.40019900 | -1.92408200 | 0.05733300  |
| N | 1.54944600  | -1.48933200 | -0.71769400 |
| C | 2.40739500  | -3.85768000 | -0.98226600 |
| H | 1.92087000  | -4.64067200 | -1.56595000 |
| H | 2.84988300  | -4.32063300 | -0.09176000 |
| C | 3.85935100  | -2.03961100 | -1.29581800 |
| O | 3.38198900  | -3.26001600 | -1.80256700 |
| C | 4.38720900  | -0.59664500 | 0.48872800  |
| C | 3.49057000  | 0.07723500  | -0.35384200 |
| C | 3.43117700  | 1.45803100  | -0.36580900 |
| C | 4.18473300  | 2.12563400  | 0.59027400  |
| C | 5.01405200  | 1.48277800  | 1.49940500  |
| C | 5.14478300  | 0.09777800  | 1.42383800  |
| C | 4.43430700  | -2.05945600 | 0.14049600  |
| H | 2.82352600  | 2.01954900  | -1.05599800 |
| H | 5.56877500  | 2.06728500  | 2.22325400  |
| H | 5.84047100  | -0.42200100 | 2.07370900  |
| H | 3.80680800  | -2.63957600 | 0.82683200  |
| H | 5.44103600  | -2.47996100 | 0.17711900  |
| C | -1.78468800 | -1.91552100 | 0.44679900  |
| C | -2.09478900 | -1.93727000 | 1.80456200  |
| C | -2.74708100 | -1.88134700 | -0.56646700 |
| C | -3.44712600 | -1.89292500 | 2.14901400  |
| C | -4.08024300 | -1.83268600 | -0.17219300 |
| C | -4.44621600 | -1.83060700 | 1.17751600  |
| H | -3.72171100 | -1.89734600 | 3.20060000  |
| H | -4.85370400 | -1.78122300 | -0.93461300 |
| C | -2.33919200 | -1.85399000 | -2.01346300 |
| H | -1.66840100 | -2.68575600 | -2.24947600 |
| H | -1.81285100 | -0.92016000 | -2.24271000 |
| H | -3.21461700 | -1.91941600 | -2.66088500 |

|   |             |             |             |
|---|-------------|-------------|-------------|
| C | -1.00700800 | -1.96449900 | 2.84432400  |
| H | -0.33284700 | -2.81128100 | 2.68648900  |
| H | -1.43400900 | -2.04262200 | 3.84496000  |
| H | -0.40187400 | -1.05208900 | 2.80231300  |
| H | 4.64491300  | -1.71859100 | -1.98370700 |
| C | -5.89903400 | -1.72737600 | 1.55880500  |
| H | -6.03231100 | -1.76884800 | 2.64138400  |
| H | -6.31567500 | -0.78229400 | 1.19537200  |
| H | -6.48145100 | -2.53533500 | 1.10713700  |
| N | 4.09661400  | 3.58531600  | 0.62867700  |
| O | 4.41317300  | 4.14435400  | 1.66691800  |
| O | 3.73136800  | 4.16204000  | -0.37757000 |
| C | -5.57537900 | 2.12646300  | 0.53306200  |
| C | -4.27128400 | 1.67010300  | 0.38101800  |
| C | -3.49052800 | 2.07790200  | -0.71272700 |
| C | -4.07048200 | 2.94403900  | -1.64912300 |
| C | -5.37807800 | 3.39750100  | -1.50083700 |
| C | -6.13693400 | 2.99227900  | -0.40665300 |
| H | -6.15791200 | 1.80870200  | 1.39293000  |
| H | -3.85979900 | 0.98545500  | 1.11755300  |
| H | -3.48079600 | 3.26541600  | -2.50364900 |
| H | -5.80199400 | 4.07062100  | -2.23947600 |
| H | -7.15537200 | 3.34637200  | -0.28440100 |
| C | -2.10402700 | 1.63192600  | -0.92561700 |
| H | -1.63200200 | 1.95254800  | -1.85228900 |
| C | -1.38525400 | 0.86985100  | -0.09411800 |
| C | 0.05551700  | 0.53158600  | -0.33708900 |
| H | 0.64371300  | 1.26053400  | 0.47691800  |
| O | 0.59055800  | 1.14096800  | -1.49250200 |
| H | -1.79640900 | 0.56041900  | 0.86338600  |
| O | 1.17233900  | 2.63180900  | 0.45796200  |
| H | 0.89108700  | 1.99417600  | -1.02230600 |
| H | 0.37706700  | 3.13395700  | 0.67839100  |

**si-TS2<sup>W</sup>**

|   |             |             |             |
|---|-------------|-------------|-------------|
| C | -0.21137600 | -1.36887900 | 0.43825900  |
| C | -1.51045600 | -2.65310300 | -0.77774900 |
| C | -2.73701200 | -1.21370300 | 0.85092900  |
| H | -2.52551500 | -1.07426000 | 1.90816500  |
| N | -0.31601200 | -2.89639500 | -1.21618300 |
| N | 0.48543100  | -2.08885500 | -0.45236200 |
| N | -1.50022400 | -1.73492900 | 0.24317400  |
| C | -2.81424100 | -3.25337400 | -1.18291800 |
| H | -2.65460500 | -4.23341700 | -1.63163100 |

|   |             |             |             |
|---|-------------|-------------|-------------|
| H | -3.32127900 | -2.60885800 | -1.91438600 |
| C | -3.93971900 | -2.20579200 | 0.61757900  |
| O | -3.57789700 | -3.42316800 | -0.00739900 |
| C | -4.44432000 | -0.04013200 | -0.36566400 |
| C | -3.17539200 | 0.07754700  | 0.20081800  |
| C | -2.46488000 | 1.27051400  | 0.15180600  |
| C | -3.07901300 | 2.33258100  | -0.49770300 |
| C | -4.34144600 | 2.24849600  | -1.08153000 |
| C | -5.03344400 | 1.04676900  | -1.01110200 |
| C | -5.01922800 | -1.41469600 | -0.16358100 |
| H | -1.48551200 | 1.38551400  | 0.60504300  |
| H | -4.76150100 | 3.11794600  | -1.57115300 |
| H | -6.02051700 | 0.95990200  | -1.45261000 |
| H | -5.25274700 | -1.90798900 | -1.11306700 |
| H | -5.95259900 | -1.37334400 | 0.40396600  |
| C | 1.91275800  | -2.14169500 | -0.60514100 |
| C | 2.48424500  | -1.42034500 | -1.65708400 |
| C | 2.65739000  | -2.90626600 | 0.29777300  |
| C | 3.87116700  | -1.46424400 | -1.78448300 |
| C | 4.04107700  | -2.91737800 | 0.12416100  |
| C | 4.66228600  | -2.20223900 | -0.90114900 |
| H | 4.34358200  | -0.90946800 | -2.59080900 |
| H | 4.64881000  | -3.50505600 | 0.80797900  |
| C | 2.00794200  | -3.67858000 | 1.41570600  |
| H | 1.03216100  | -4.07056800 | 1.11498200  |
| H | 1.86215600  | -3.04777600 | 2.30140700  |
| H | 2.63893700  | -4.52187100 | 1.70278500  |
| C | 1.62681100  | -0.59909800 | -2.58258300 |
| H | 1.10774700  | 0.19359900  | -2.02995700 |
| H | 0.86276000  | -1.21530900 | -3.06469900 |
| H | 2.23629600  | -0.13058800 | -3.35631900 |
| H | -4.31986400 | -2.50873300 | 1.59280600  |
| C | 6.16166000  | -2.23302800 | -1.04423800 |
| H | 6.52383800  | -3.26169300 | -1.12432900 |
| H | 6.48712500  | -1.68397500 | -1.92968400 |
| H | 6.64161200  | -1.78538800 | -0.16907900 |
| N | -2.36685900 | 3.61573100  | -0.55540700 |
| O | -2.88431600 | 4.52667600  | -1.17923000 |
| O | -1.29879200 | 3.70099300  | 0.02510800  |
| C | 4.06592700  | 3.68581300  | -0.45099900 |
| C | 3.25312300  | 2.65511000  | 0.00502200  |
| C | 2.08946000  | 2.92910700  | 0.74106300  |
| C | 1.77907100  | 4.26875500  | 1.01040600  |
| C | 2.59364700  | 5.30135400  | 0.55598200  |

|   |             |             |             |
|---|-------------|-------------|-------------|
| C | 3.74181400  | 5.01493800  | -0.17782100 |
| H | 4.96264500  | 3.45085400  | -1.01617700 |
| H | 3.53503400  | 1.62671500  | -0.20564600 |
| H | 0.87791900  | 4.49603000  | 1.57289500  |
| H | 2.33095800  | 6.33137800  | 0.77653300  |
| H | 4.38143200  | 5.81742500  | -0.53087900 |
| C | 1.18841100  | 1.87639200  | 1.23960700  |
| H | 0.40956800  | 2.19174400  | 1.93087700  |
| C | 1.24581500  | 0.58487700  | 0.89534800  |
| C | 0.34398700  | -0.46054700 | 1.45921400  |
| H | 0.89472700  | -1.16290500 | 2.32978100  |
| O | -0.65330600 | 0.03356700  | 2.31591200  |
| H | 2.01002300  | 0.23874100  | 0.20490500  |
| O | 0.75369000  | -1.46914700 | 3.73242600  |
| H | 0.26951600  | -2.30536100 | 3.73280300  |
| H | -0.33048500 | -0.43845100 | 3.16683500  |

### TS3

|   |             |             |             |
|---|-------------|-------------|-------------|
| C | -2.40240000 | -0.90492200 | 0.28185800  |
| C | -3.97532000 | -2.05260800 | 1.30455600  |
| C | -4.57533400 | 0.31727300  | 0.97231100  |
| H | -3.99398100 | 1.23048100  | 1.06864500  |
| N | -3.05254400 | -2.92777300 | 1.05054100  |
| N | -2.08335900 | -2.21580700 | 0.39841800  |
| N | -3.63428000 | -0.80672900 | 0.85711200  |
| C | -5.24465800 | -2.20457100 | 2.07183600  |
| H | -5.20415800 | -3.09932100 | 2.69186300  |
| H | -6.10544500 | -2.27888200 | 1.39240600  |
| C | -5.52615500 | 0.13943300  | 2.21993200  |
| O | -5.33666700 | -1.07667500 | 2.91877600  |
| C | -6.84207500 | 0.32632500  | 0.17868700  |
| C | -5.50624000 | 0.35209100  | -0.21719900 |
| C | -5.14200900 | 0.38414900  | -1.55631900 |
| C | -6.17627000 | 0.38007900  | -2.48163700 |
| C | -7.52266600 | 0.35929100  | -2.12337200 |
| C | -7.85907900 | 0.33481000  | -0.77568700 |
| C | -6.96918900 | 0.29877600  | 1.67765800  |
| H | -4.10570400 | 0.42961400  | -1.87097800 |
| H | -8.28032500 | 0.35901000  | -2.89702700 |
| H | -8.90145600 | 0.31570500  | -0.47595000 |
| H | -7.60209500 | -0.52063000 | 2.03313500  |
| H | -7.41454900 | 1.22761600  | 2.04543100  |
| C | -1.00655600 | -2.94562100 | -0.21398800 |
| C | -1.09016000 | -3.21634900 | -1.58320200 |

|   |             |             |             |
|---|-------------|-------------|-------------|
| C | 0.07007000  | -3.33844600 | 0.58249200  |
| C | -0.02300500 | -3.90028800 | -2.16148200 |
| C | 1.10107600  | -4.04334900 | -0.03944600 |
| C | 1.07768800  | -4.31700400 | -1.40882400 |
| H | -0.05323000 | -4.11552000 | -3.22658000 |
| H | 1.94537300  | -4.38018100 | 0.55654200  |
| C | 0.13477200  | -2.93711200 | 2.03049900  |
| H | -0.76976600 | -3.22687600 | 2.57341400  |
| H | 0.22853500  | -1.84490500 | 2.10438700  |
| H | 0.99736200  | -3.38906400 | 2.52390300  |
| C | -2.25966600 | -2.74172300 | -2.40306100 |
| H | -2.16977000 | -1.67001800 | -2.61619200 |
| H | -3.20793200 | -2.89997800 | -1.88076100 |
| H | -2.29833400 | -3.27038000 | -3.35630300 |
| H | -5.29168300 | 0.91093300  | 2.95337000  |
| C | 2.23423900  | -5.01521900 | -2.07388000 |
| H | 1.88657800  | -5.72527100 | -2.82806300 |
| H | 2.87443400  | -4.28447600 | -2.58027700 |
| H | 2.84716200  | -5.55096600 | -1.34588400 |
| N | -5.83204300 | 0.39542100  | -3.90881600 |
| O | -6.74443900 | 0.45520200  | -4.71456000 |
| O | -4.65246200 | 0.34305200  | -4.21015800 |
| C | 3.64430000  | -0.96104400 | -2.28884800 |
| C | 2.40177900  | -0.69006800 | -1.73396500 |
| C | 1.69600600  | 0.48129300  | -2.08302200 |
| C | 2.31714900  | 1.38615900  | -2.97212900 |
| C | 3.55849800  | 1.11397100  | -3.52056000 |
| C | 4.22763100  | -0.06760800 | -3.18317700 |
| H | 4.17572000  | -1.86466700 | -2.00594500 |
| H | 1.97526500  | -1.40470800 | -1.03511500 |
| H | 1.79143900  | 2.30026100  | -3.23876000 |
| H | 4.01180800  | 1.81887300  | -4.21119700 |
| H | 5.19754100  | -0.28942800 | -3.61551100 |
| C | 0.39513000  | 0.80082200  | -1.55857100 |
| H | -0.05797200 | 1.73241200  | -1.88775700 |
| C | -0.35057800 | -0.04960400 | -0.77102600 |
| C | -1.65823000 | 0.18585300  | -0.32157600 |
| O | -2.33916800 | 1.30575200  | -0.48921000 |
| H | 0.10428700  | -0.98447800 | -0.47493300 |
| H | -2.19960000 | 1.99337800  | 0.45930600  |
| C | 1.22856600  | 0.85007600  | 2.15852300  |
| H | 1.68703700  | 0.12061000  | 2.81477500  |
| C | 2.00294300  | 1.36190300  | 1.07746500  |
| C | 1.47156900  | 2.50406600  | 0.40325300  |

|   |             |             |             |
|---|-------------|-------------|-------------|
| H | 2.07774300  | 2.96258500  | -0.36751900 |
| C | 0.23176900  | 3.03782700  | 0.68276600  |
| C | -0.61349300 | 2.30165000  | 1.56484400  |
| C | -0.03695700 | 1.30598400  | 2.44496400  |
| C | -0.23893200 | 4.36461100  | 0.06293300  |
| C | -0.77815600 | 0.89475800  | 3.72652100  |
| C | 0.89226100  | 5.02692700  | -0.73592200 |
| H | 1.79214400  | 5.16879500  | -0.12863100 |
| H | 1.16278000  | 4.44104600  | -1.62191000 |
| H | 0.55925100  | 6.01020400  | -1.08062300 |
| C | -1.44898800 | 4.23495200  | -0.88065100 |
| H | -2.35017700 | 3.94292600  | -0.34268600 |
| H | -1.63159100 | 5.20647400  | -1.35313800 |
| H | -1.27289300 | 3.50180300  | -1.67223100 |
| C | -0.61767000 | 5.30805300  | 1.22007000  |
| H | -0.95218000 | 6.27216100  | 0.82172100  |
| H | -1.42627200 | 4.87824300  | 1.81575100  |
| H | 0.24398000  | 5.48646000  | 1.87138700  |
| C | -1.17551400 | 2.17543900  | 4.48557700  |
| H | -1.84763400 | 2.79185100  | 3.88516200  |
| H | -1.68349500 | 1.91061000  | 5.41908100  |
| H | -0.28728900 | 2.76484200  | 4.73486400  |
| C | -2.04594200 | 0.08301100  | 3.42614500  |
| H | -2.55140800 | -0.18476100 | 4.36043200  |
| H | -2.73103000 | 0.67272500  | 2.81751600  |
| H | -1.79981300 | -0.84778400 | 2.90102800  |
| C | 0.10992600  | 0.05774000  | 4.65598500  |
| H | 1.02480900  | 0.59207100  | 4.92973000  |
| H | -0.44286200 | -0.15848000 | 5.57509700  |
| H | 0.39037100  | -0.90193700 | 4.20874800  |
| O | -1.91016100 | 2.51340800  | 1.52825600  |
| C | 3.28223000  | 0.83038800  | 0.73651600  |
| C | 3.68564500  | -0.46767000 | 1.19101200  |
| H | 2.95800600  | -1.04540600 | 1.75058800  |
| C | 4.24508700  | 1.58639100  | 0.00061400  |
| H | 3.98880000  | 2.60243200  | -0.27062900 |
| C | 4.89791800  | -1.01991300 | 0.90599000  |
| C | 5.49661500  | 1.12685800  | -0.29458600 |
| C | 5.86314700  | -0.25257100 | 0.08805600  |
| C | 5.27627300  | -2.42660700 | 1.37274900  |
| C | 6.57047700  | 2.03494500  | -0.90428900 |
| C | 6.03097200  | 3.44193100  | -1.18714700 |
| H | 5.18773200  | 3.41155600  | -1.88648800 |
| H | 5.70692900  | 3.94911900  | -0.27235500 |

|   |            |             |             |
|---|------------|-------------|-------------|
| H | 6.82314100 | 4.04513000  | -1.64181500 |
| C | 7.72625600 | 2.16537300  | 0.10758000  |
| H | 7.35914200 | 2.56784000  | 1.05760000  |
| H | 8.18966500 | 1.19532900  | 0.29214300  |
| H | 8.48623300 | 2.85129900  | -0.28271700 |
| C | 7.12088400 | 1.48408300  | -2.23264500 |
| H | 7.42304400 | 0.44176800  | -2.13253300 |
| H | 6.36578000 | 1.56834100  | -3.01884000 |
| H | 7.99004900 | 2.07792300  | -2.53847700 |
| C | 6.59334100 | -2.39812500 | 2.17043700  |
| H | 7.41658700 | -2.03542700 | 1.55704100  |
| H | 6.49205200 | -1.74756900 | 3.04573100  |
| H | 6.82925000 | -3.40774700 | 2.52488100  |
| C | 4.20327900 | -3.02949100 | 2.28626400  |
| H | 4.05317500 | -2.42954900 | 3.19054900  |
| H | 3.24264700 | -3.11644300 | 1.76941500  |
| H | 4.51041100 | -4.03431700 | 2.59265300  |
| C | 5.41885100 | -3.34983700 | 0.14894400  |
| H | 4.44897600 | -3.45745700 | -0.35338400 |
| H | 6.14463300 | -2.94694000 | -0.55936900 |
| H | 5.74627800 | -4.34750400 | 0.46337300  |
| O | 6.95607700 | -0.74728800 | -0.24520700 |

### M3

|   |             |             |             |
|---|-------------|-------------|-------------|
| C | -2.49422000 | -0.44495100 | 0.57397700  |
| C | -3.86571500 | -0.32888900 | 2.25537300  |
| C | -4.51997600 | 1.09958500  | 0.34113200  |
| H | -3.93021400 | 1.64415800  | -0.40039600 |
| N | -2.96751200 | -1.20697300 | 2.61328800  |
| N | -2.12503600 | -1.27373500 | 1.54949100  |
| N | -3.61635900 | 0.14806200  | 1.00002900  |
| C | -4.99260100 | 0.30101600  | 3.00765300  |
| H | -4.86576400 | 0.14807600  | 4.07854400  |
| H | -5.95544300 | -0.12355700 | 2.69320200  |
| C | -5.14811000 | 2.07934600  | 1.40709000  |
| O | -4.90461100 | 1.68876800  | 2.74742000  |
| C | -6.90797100 | 0.95278600  | 0.17442700  |
| C | -5.71157400 | 0.37634700  | -0.25139100 |
| C | -5.69530000 | -0.73186000 | -1.08666300 |
| C | -6.92816000 | -1.23690700 | -1.47432300 |
| C | -8.14175800 | -0.68144800 | -1.07732700 |
| C | -8.13064900 | 0.42886700  | -0.24198700 |
| C | -6.65619500 | 2.13086500  | 1.07413900  |
| H | -4.77507500 | -1.18240800 | -1.43738100 |

|   |             |             |             |
|---|-------------|-------------|-------------|
| H | -9.06858100 | -1.12513500 | -1.41872900 |
| H | -9.06405100 | 0.87215100  | 0.08750800  |
| H | -7.24718600 | 2.10392000  | 1.99397300  |
| H | -6.89987500 | 3.06489800  | 0.55855600  |
| C | -1.09448000 | -2.28132400 | 1.45352300  |
| C | -1.32853900 | -3.36164600 | 0.60036500  |
| C | 0.09783500  | -2.08862600 | 2.15650500  |
| C | -0.28179100 | -4.26702400 | 0.42832100  |
| C | 1.10416600  | -3.02857000 | 1.95426900  |
| C | 0.94094700  | -4.10623800 | 1.07891300  |
| H | -0.42768800 | -5.11289900 | -0.23796900 |
| H | 2.04832300  | -2.91130800 | 2.47922200  |
| C | 0.29562600  | -0.88356500 | 3.03327800  |
| H | -0.51532500 | -0.77431400 | 3.75951500  |
| H | 0.32482500  | 0.02839400  | 2.42316400  |
| H | 1.24077500  | -0.95139800 | 3.57562900  |
| C | -2.62974800 | -3.53561000 | -0.13946300 |
| H | -2.63261500 | -2.96712600 | -1.07723900 |
| H | -3.48789100 | -3.21342300 | 0.45749100  |
| H | -2.77560200 | -4.58480200 | -0.39987000 |
| H | -4.67977600 | 3.06003200  | 1.32105400  |
| C | 2.08585800  | -5.04739100 | 0.82042100  |
| H | 1.73731400  | -5.99684300 | 0.40987800  |
| H | 2.77645700  | -4.59899400 | 0.09744100  |
| H | 2.64940700  | -5.24509200 | 1.73527000  |
| N | -6.94787700 | -2.42208700 | -2.34197400 |
| O | -8.02921400 | -2.82048100 | -2.73598100 |
| O | -5.88066300 | -2.94312700 | -2.61524800 |
| C | 3.67994700  | -1.87735800 | -1.46810100 |
| C | 2.37010800  | -1.48824700 | -1.22374900 |
| C | 1.44049300  | -1.42677000 | -2.27563900 |
| C | 1.84924300  | -1.77869400 | -3.57237300 |
| C | 3.15923400  | -2.17156200 | -3.81454500 |
| C | 4.07322900  | -2.22384400 | -2.76188300 |
| H | 4.39431100  | -1.88971800 | -0.64965500 |
| H | 2.07214800  | -1.24244300 | -0.20886200 |
| H | 1.12974100  | -1.73958400 | -4.38608500 |
| H | 3.46725400  | -2.44165200 | -4.81905400 |
| H | 5.09599700  | -2.53645500 | -2.94712100 |
| C | 0.05272300  | -1.04870000 | -2.05852700 |
| H | -0.63803900 | -1.23595700 | -2.88159200 |
| C | -0.46393200 | -0.53902300 | -0.91959900 |
| C | -1.89703800 | -0.35209500 | -0.81273000 |
| O | -2.69982200 | -0.21165800 | -1.72245400 |

|   |             |             |             |
|---|-------------|-------------|-------------|
| H | 0.14792400  | -0.31141100 | -0.04983300 |
| H | -1.83244900 | 3.58300400  | -1.14785600 |
| C | 1.47751700  | 2.07872800  | 1.18319000  |
| H | 1.93312000  | 1.96907000  | 2.16033900  |
| C | 2.24454200  | 1.72820500  | 0.06391600  |
| C | 1.68693700  | 1.98881500  | -1.19355900 |
| H | 2.27181200  | 1.72306400  | -2.06537500 |
| C | 0.41277900  | 2.53420800  | -1.36626800 |
| C | -0.35058100 | 2.77830600  | -0.20529800 |
| C | 0.19114200  | 2.61164600  | 1.08787900  |
| C | -0.08850000 | 2.91248100  | -2.77502400 |
| C | -0.54354100 | 3.11532000  | 2.34293000  |
| C | 0.93091400  | 2.53203200  | -3.85892100 |
| H | 1.88702200  | 3.04435800  | -3.72000100 |
| H | 1.11362200  | 1.45221100  | -3.87233000 |
| H | 0.53396300  | 2.81952600  | -4.83705300 |
| C | -1.39620500 | 2.19671400  | -3.16382500 |
| H | -2.21694800 | 2.31961500  | -2.45368600 |
| H | -1.73955800 | 2.56762300  | -4.13499400 |
| H | -1.22559400 | 1.12143900  | -3.25279100 |
| C | -0.25735800 | 4.44568500  | -2.85249400 |
| H | -0.59586600 | 4.73353700  | -3.85288900 |
| H | -0.97479200 | 4.85952900  | -2.13565500 |
| H | 0.70088500  | 4.93522100  | -2.65750100 |
| C | -0.82845400 | 4.62287200  | 2.19869200  |
| H | -1.48503200 | 4.82910300  | 1.35320000  |
| H | -1.30702600 | 4.99586700  | 3.11072800  |
| H | 0.10772000  | 5.17186300  | 2.05713800  |
| C | -1.86124300 | 2.35899600  | 2.55618900  |
| H | -2.40299600 | 2.76556100  | 3.41646200  |
| H | -2.50273700 | 2.44414200  | 1.67976400  |
| H | -1.66639900 | 1.29790700  | 2.76044800  |
| C | 0.29615100  | 2.93867200  | 3.61571100  |
| H | 1.23506600  | 3.49770900  | 3.56433400  |
| H | -0.27409600 | 3.31940000  | 4.46850200  |
| H | 0.53047800  | 1.88837600  | 3.81743400  |
| O | -1.66361400 | 3.20859400  | -0.27732900 |
| C | 3.58993200  | 1.14380800  | 0.20660600  |
| C | 3.92037800  | 0.33150400  | 1.30313000  |
| H | 3.14841900  | 0.15025000  | 2.04866800  |
| C | 4.59424400  | 1.36615300  | -0.74857600 |
| H | 4.36824900  | 2.04075800  | -1.56959000 |
| C | 5.16121400  | -0.26962300 | 1.45404000  |
| C | 5.85376300  | 0.79541600  | -0.67180100 |

|   |            |             |             |
|---|------------|-------------|-------------|
| C | 6.17766300 | -0.10089800 | 0.42699000  |
| C | 5.47830700 | -1.14971400 | 2.66823200  |
| C | 6.92957200 | 1.09378100  | -1.72252400 |
| C | 6.45608000 | 2.10069500  | -2.77697600 |
| H | 5.58613900 | 1.72972200  | -3.33020600 |
| H | 6.19068200 | 3.06413800  | -2.32828200 |
| H | 7.26142700 | 2.27637300  | -3.49844700 |
| C | 8.17532200 | 1.68693500  | -1.03950700 |
| H | 7.92684700 | 2.64089200  | -0.56064200 |
| H | 8.54794200 | 0.99662000  | -0.28232800 |
| H | 8.96202400 | 1.87408800  | -1.78082100 |
| C | 7.31475000 | -0.20124400 | -2.45996300 |
| H | 7.62103000 | -0.96166400 | -1.74038200 |
| H | 6.45789900 | -0.57132500 | -3.03398800 |
| H | 8.13645100 | -0.01215300 | -3.16215700 |
| C | 6.74504900 | -0.64140100 | 3.38088000  |
| H | 7.58610300 | -0.63062700 | 2.68897100  |
| H | 6.58264100 | 0.37397400  | 3.75979900  |
| H | 6.98243400 | -1.28661700 | 4.23569100  |
| C | 4.35031600 | -1.14565100 | 3.70555900  |
| H | 4.13625300 | -0.13472800 | 4.07046400  |
| H | 3.42429800 | -1.55893600 | 3.29431400  |
| H | 4.63794500 | -1.76329700 | 4.56288800  |
| C | 5.68881400 | -2.60269000 | 2.20797200  |
| H | 4.76266100 | -2.99520300 | 1.76817500  |
| H | 6.48092000 | -2.64079700 | 1.45901900  |
| H | 5.95938600 | -3.24353900 | 3.05648800  |
| O | 7.29782800 | -0.70576700 | 0.49009600  |

**TS3<sup>HCT-C2</sup>**

|   |             |             |             |
|---|-------------|-------------|-------------|
| C | -0.69856500 | -0.10723100 | -0.84097100 |
| C | -1.40428300 | -1.97775300 | -1.80281000 |
| C | -2.99783900 | -1.02815900 | -0.17490200 |
| H | -2.86439600 | -0.61871400 | 0.82339200  |
| N | -0.33629900 | -1.68151400 | -2.46119900 |
| N | 0.10710200  | -0.50229700 | -1.88724200 |
| N | -1.67674800 | -1.08325500 | -0.79818900 |
| C | -2.34237500 | -3.12390000 | -1.98589900 |
| H | -1.81491600 | -3.98856500 | -2.39207600 |
| H | -3.15188000 | -2.84885200 | -2.67728000 |
| C | -3.64678900 | -2.46265300 | -0.12232600 |
| O | -2.84438700 | -3.47069000 | -0.71033200 |
| C | -5.08682100 | -0.94974700 | -1.36745900 |
| C | -3.96599700 | -0.20649900 | -0.99806900 |

|   |             |             |             |
|---|-------------|-------------|-------------|
| C | -3.80943700 | 1.11311600  | -1.40233800 |
| C | -4.80316600 | 1.64049600  | -2.21569800 |
| C | -5.93281200 | 0.92478100  | -2.60579300 |
| C | -6.07894200 | -0.38564300 | -2.16869700 |
| C | -5.03921300 | -2.33697800 | -0.78930100 |
| H | -2.96336000 | 1.71738000  | -1.09868300 |
| H | -6.67213200 | 1.39762900  | -3.23982000 |
| H | -6.95187800 | -0.96118100 | -2.45747400 |
| H | -5.17586700 | -3.11704800 | -1.54496300 |
| H | -5.83130200 | -2.47285700 | -0.04677000 |
| C | 1.01215100  | 0.30425000  | -2.65364400 |
| C | 0.53878400  | 1.45557000  | -3.29232100 |
| C | 2.34907600  | -0.10359500 | -2.73742500 |
| C | 1.47514400  | 2.25489500  | -3.95206500 |
| C | 3.24079500  | 0.71972000  | -3.41910300 |
| C | 2.82507300  | 1.91496400  | -4.01323600 |
| H | 1.13294200  | 3.16864800  | -4.43195700 |
| H | 4.28659800  | 0.42627800  | -3.47851300 |
| C | 2.77994300  | -1.39591400 | -2.10756700 |
| H | 2.42854000  | -2.24929800 | -2.69724400 |
| H | 2.33997600  | -1.49837900 | -1.11262300 |
| H | 3.86604100  | -1.45863200 | -2.02464100 |
| C | -0.91217100 | 1.85399200  | -3.26615900 |
| H | -1.13820300 | 2.45557800  | -2.37880200 |
| H | -1.57103600 | 0.97983100  | -3.26022500 |
| H | -1.15383200 | 2.45729800  | -4.14349900 |
| H | -3.74666100 | -2.77363000 | 0.91720100  |
| C | 3.81851300  | 2.80281200  | -4.71616700 |
| H | 4.16725600  | 2.34058100  | -5.64499200 |
| H | 3.37755800  | 3.77052300  | -4.96337700 |
| H | 4.69726600  | 2.97666300  | -4.08869300 |
| N | -4.64834900 | 3.02020200  | -2.69135500 |
| O | -5.54399100 | 3.49470700  | -3.36800500 |
| O | -3.62819000 | 3.61626900  | -2.39011400 |
| C | 3.73977300  | 4.82018300  | -1.13985800 |
| C | 2.75956400  | 3.86736400  | -0.89411200 |
| C | 1.51954600  | 4.23686600  | -0.34282700 |
| C | 1.30141700  | 5.59479700  | -0.06396200 |
| C | 2.28422700  | 6.54833500  | -0.30995400 |
| C | 3.51070000  | 6.16560300  | -0.84651400 |
| H | 4.68916800  | 4.51221600  | -1.56775000 |
| H | 2.95430000  | 2.83040300  | -1.15503000 |
| H | 0.34314100  | 5.90069400  | 0.34895100  |
| H | 2.08977700  | 7.59198900  | -0.08337200 |

|   |             |             |             |
|---|-------------|-------------|-------------|
| H | 4.27968400  | 6.90652600  | -1.03931300 |
| C | 0.44561100  | 3.27324700  | -0.08389200 |
| H | -0.51397400 | 3.68289500  | 0.22711100  |
| C | 0.54165700  | 1.93917400  | -0.24354400 |
| C | -0.55757300 | 1.02298400  | -0.03451100 |
| O | -1.59785700 | 1.38672800  | 0.75833800  |
| H | 1.47664600  | 1.50000400  | -0.57989800 |
| H | -1.36898300 | 1.31794500  | 1.77371700  |
| C | -0.76004900 | -1.18775100 | 2.51027600  |
| H | -0.99767100 | -2.24341300 | 2.45269900  |
| C | 0.58364100  | -0.78333700 | 2.14057700  |
| C | 0.98728700  | 0.54629800  | 2.54124300  |
| H | 2.02385200  | 0.82305300  | 2.40519400  |
| C | 0.13985700  | 1.46039700  | 3.08285300  |
| C | -1.30679500 | 1.11657900  | 3.14050500  |
| C | -1.64770600 | -0.34067800 | 3.08734800  |
| C | 0.61366900  | 2.76576100  | 3.72506600  |
| C | -2.93448900 | -0.79828900 | 3.77839000  |
| C | 2.12831600  | 2.93904000  | 3.56968700  |
| H | 2.68785800  | 2.12445400  | 4.04148300  |
| H | 2.41188600  | 2.99881900  | 2.51238900  |
| H | 2.43012200  | 3.87424300  | 4.05025800  |
| C | -0.05556800 | 4.03203400  | 3.16155300  |
| H | -1.13702900 | 3.92557100  | 3.09333900  |
| H | 0.17402100  | 4.87218400  | 3.82598700  |
| H | 0.35052100  | 4.27063600  | 2.17786700  |
| C | 0.28363300  | 2.64989300  | 5.22849100  |
| H | 0.66809600  | 3.52880600  | 5.75600800  |
| H | -0.79604600 | 2.59673000  | 5.38582800  |
| H | 0.74822200  | 1.75808400  | 5.66148600  |
| C | -2.89390900 | -0.29590100 | 5.23849400  |
| H | -2.97097200 | 0.79016700  | 5.28867400  |
| H | -3.73196500 | -0.73224100 | 5.79114700  |
| H | -1.96474500 | -0.60781800 | 5.72691600  |
| C | -4.20267800 | -0.25067900 | 3.09444900  |
| H | -5.05979200 | -0.40105100 | 3.75903600  |
| H | -4.11052600 | 0.81408700  | 2.87893300  |
| H | -4.42389500 | -0.78765500 | 2.16583500  |
| C | -3.02496100 | -2.32704800 | 3.83130900  |
| H | -2.19340000 | -2.75974700 | 4.39646600  |
| H | -3.95732000 | -2.61218500 | 4.32686100  |
| H | -3.02959100 | -2.78041600 | 2.83566700  |
| O | -2.16621300 | 1.95440800  | 3.47397400  |
| C | 1.49108300  | -1.69265700 | 1.58584000  |

|   |             |             |             |
|---|-------------|-------------|-------------|
| C | 1.04288100  | -2.92223700 | 0.97868400  |
| H | -0.02366200 | -3.11704200 | 0.96202800  |
| C | 2.91652300  | -1.46625500 | 1.63515000  |
| H | 3.27109700  | -0.61171900 | 2.19502700  |
| C | 1.88284100  | -3.80178800 | 0.37460100  |
| C | 3.82616000  | -2.31111300 | 1.09131200  |
| C | 3.33301200  | -3.47196800 | 0.30401800  |
| C | 1.38904400  | -5.08724800 | -0.28765400 |
| C | 5.33351700  | -2.09770200 | 1.23526000  |
| C | 5.65114700  | -0.94414900 | 2.19469000  |
| H | 5.27534500  | 0.01443500  | 1.82210700  |
| H | 5.23246800  | -1.11862300 | 3.19133500  |
| H | 6.73652600  | -0.85410600 | 2.29688600  |
| C | 5.98764700  | -3.37161200 | 1.80258800  |
| H | 5.55667400  | -3.62185000 | 2.77769000  |
| H | 5.85413100  | -4.21925800 | 1.13028300  |
| H | 7.06027500  | -3.20021000 | 1.94074000  |
| C | 5.95663800  | -1.75648300 | -0.13084100 |
| H | 5.77629600  | -2.55162900 | -0.85462600 |
| H | 5.53913900  | -0.82000000 | -0.51691300 |
| H | 7.03790400  | -1.62155700 | -0.01645300 |
| C | 2.18842600  | -6.29794600 | 0.23101000  |
| H | 3.24430800  | -6.21944400 | -0.02418300 |
| H | 2.09250800  | -6.38290000 | 1.31868000  |
| H | 1.78634500  | -7.21377500 | -0.21482100 |
| C | -0.08763600 | -5.34730500 | 0.02649800  |
| H | -0.25987400 | -5.43755100 | 1.10471300  |
| H | -0.74110400 | -4.55820700 | -0.35487600 |
| H | -0.39449700 | -6.28653100 | -0.44379500 |
| C | 1.53935100  | -4.96944100 | -1.81552700 |
| H | 0.94468200  | -4.12641100 | -2.18707400 |
| H | 2.58294700  | -4.81422300 | -2.09431500 |
| H | 1.17891100  | -5.88709600 | -2.29400600 |
| O | 4.10164700  | -4.13625500 | -0.39643300 |

**TS3<sup>HCT-C3</sup>**

|   |             |             |             |
|---|-------------|-------------|-------------|
| C | -1.49837300 | -0.70938000 | -0.62220900 |
| C | -2.46904900 | -2.58315800 | -1.24316900 |
| C | -3.67453700 | -1.42653600 | 0.56203200  |
| H | -3.36899000 | -0.87507700 | 1.44563000  |
| N | -1.55394100 | -2.38469100 | -2.13805300 |
| N | -0.96634300 | -1.20311900 | -1.76759500 |
| N | -2.48975800 | -1.59292000 | -0.29646400 |
| C | -3.43944200 | -3.70961300 | -1.09575200 |

|   |             |             |             |
|---|-------------|-------------|-------------|
| H | -3.02419000 | -4.62433000 | -1.51806900 |
| H | -4.37945100 | -3.47505900 | -1.61516100 |
| C | -4.28861800 | -2.82834700 | 0.93166100  |
| O | -3.63600100 | -3.90831300 | 0.28917200  |
| C | -5.95191400 | -1.46218200 | -0.20087100 |
| C | -4.77556300 | -0.71326000 | -0.18843000 |
| C | -4.68919500 | 0.51835100  | -0.82168700 |
| C | -5.82285400 | 0.95270300  | -1.49476700 |
| C | -7.01357200 | 0.23043900  | -1.53104400 |
| C | -7.08028500 | -0.98973300 | -0.86969300 |
| C | -5.79344900 | -2.73962100 | 0.57748100  |
| H | -3.79218600 | 1.12672500  | -0.79378100 |
| H | -7.86182700 | 0.62930400  | -2.07304800 |
| H | -7.99821300 | -1.56732300 | -0.88467800 |
| H | -6.10733100 | -3.62460600 | 0.01530200  |
| H | -6.39778300 | -2.71083200 | 1.48878300  |
| C | -0.11810200 | -0.52986400 | -2.71438400 |
| C | -0.60869200 | 0.61941900  | -3.34736700 |
| C | 1.15187000  | -1.05437800 | -2.96643200 |
| C | 0.26753000  | 1.30602300  | -4.18606800 |
| C | 1.97651100  | -0.34302100 | -3.83596100 |
| C | 1.56706900  | 0.85520800  | -4.42288000 |
| H | -0.07950400 | 2.21508800  | -4.67128600 |
| H | 2.96677000  | -0.73544000 | -4.04943700 |
| C | 1.60292400  | -2.33773700 | -2.33109900 |
| H | 1.07537800  | -3.19103700 | -2.76985400 |
| H | 1.39254600  | -2.34086400 | -1.25781600 |
| H | 2.67661500  | -2.48812000 | -2.46726300 |
| C | -2.00961400 | 1.12790400  | -3.13154300 |
| H | -2.05962400 | 1.79041800  | -2.26016300 |
| H | -2.72178800 | 0.31053300  | -2.98008100 |
| H | -2.33793900 | 1.70506200  | -3.99760300 |
| H | -4.14212000 | -3.01646100 | 1.99523000  |
| C | 2.51342700  | 1.65769600  | -5.27522700 |
| H | 1.99447000  | 2.12340600  | -6.11629700 |
| H | 2.96206600  | 2.46075000  | -4.68012100 |
| H | 3.32312700  | 1.03596200  | -5.66320900 |
| N | -5.75706500 | 2.23463400  | -2.20687400 |
| O | -6.77033800 | 2.63764000  | -2.74956700 |
| O | -4.68904100 | 2.82276100  | -2.22182000 |
| C | 3.24713500  | 3.88919300  | -1.67973700 |
| C | 2.24934800  | 3.02400700  | -1.24751200 |
| C | 1.06491600  | 3.52545900  | -0.67670200 |
| C | 0.92075900  | 4.91669700  | -0.56623200 |

|   |             |             |             |
|---|-------------|-------------|-------------|
| C | 1.92523600  | 5.78090000  | -0.98988100 |
| C | 3.09445600  | 5.27066300  | -1.54699600 |
| H | 4.15255200  | 3.48522800  | -2.12309500 |
| H | 2.39280700  | 1.95142500  | -1.36373500 |
| H | 0.00306000  | 5.32020200  | -0.14675800 |
| H | 1.79132300  | 6.85309800  | -0.88860000 |
| H | 3.88007800  | 5.94036200  | -1.88078100 |
| C | -0.02294800 | 2.66015900  | -0.21840800 |
| H | -0.87237100 | 3.14488500  | 0.26133500  |
| C | -0.06692500 | 1.32501900  | -0.39108400 |
| C | -1.17392900 | 0.51645100  | 0.07203500  |
| O | -2.01135300 | 0.92729700  | 0.96977800  |
| H | 0.74951400  | 0.80761200  | -0.88596300 |
| H | -1.46513100 | 0.64828500  | 2.11814200  |
| C | 0.23015900  | -0.55329000 | 2.30424400  |
| H | -0.01856800 | -1.57322500 | 2.03697500  |
| C | 1.47328500  | -0.05114200 | 1.89326500  |
| C | 1.78806200  | 1.32447300  | 2.24891800  |
| H | 2.73016300  | 1.72445100  | 1.89743500  |
| C | 1.01273300  | 2.10771900  | 3.03002700  |
| C | -0.24551600 | 1.52931900  | 3.59487100  |
| C | -0.70373400 | 0.18839000  | 3.09199100  |
| C | 1.43083900  | 3.51781500  | 3.44852500  |
| C | -1.66722500 | -0.60145600 | 4.02723000  |
| C | 2.70347800  | 3.96763100  | 2.71844100  |
| H | 3.56862900  | 3.35459900  | 2.99207400  |
| H | 2.58064200  | 3.93560000  | 1.63035100  |
| H | 2.92878700  | 4.99995600  | 3.00215600  |
| C | 0.31566900  | 4.52472800  | 3.11450300  |
| H | -0.60617200 | 4.29128200  | 3.64637300  |
| H | 0.63917100  | 5.53218600  | 3.39683800  |
| H | 0.11678900  | 4.52550900  | 2.03914600  |
| C | 1.71965100  | 3.54415700  | 4.96195700  |
| H | 2.05625800  | 4.54589600  | 5.25015400  |
| H | 0.82978300  | 3.29415200  | 5.53939600  |
| H | 2.51478500  | 2.83404900  | 5.21167500  |
| C | -1.05741000 | -0.68324600 | 5.43878900  |
| H | -0.98732400 | 0.30235100  | 5.90000800  |
| H | -1.68308900 | -1.31995700 | 6.07358100  |
| H | -0.05602200 | -1.12481900 | 5.39473200  |
| C | -3.04433600 | 0.07639600  | 4.11529300  |
| H | -3.70978400 | -0.51307200 | 4.75478400  |
| H | -2.94921600 | 1.07820700  | 4.53391500  |
| H | -3.51666000 | 0.17113600  | 3.13159800  |

|   |             |             |             |
|---|-------------|-------------|-------------|
| C | -1.84381900 | -2.04846000 | 3.54123800  |
| H | -0.93720500 | -2.63904400 | 3.70668600  |
| H | -2.65438300 | -2.52285400 | 4.10352600  |
| H | -2.08330500 | -2.11818400 | 2.47533300  |
| O | -0.89598000 | 2.14429000  | 4.43408400  |
| C | 2.42933900  | -0.84759300 | 1.20267000  |
| C | 2.36678400  | -2.27608500 | 1.24244300  |
| H | 1.61856000  | -2.72719800 | 1.88381000  |
| C | 3.52901400  | -0.27030100 | 0.49839400  |
| H | 3.62390100  | 0.80843300  | 0.49374400  |
| C | 3.24011700  | -3.08461600 | 0.57509200  |
| C | 4.44312600  | -1.00611800 | -0.20100900 |
| C | 4.26412800  | -2.46646600 | -0.29277800 |
| C | 3.17789400  | -4.60990500 | 0.67569600  |
| C | 5.62605400  | -0.35348600 | -0.91917600 |
| C | 5.76577700  | 1.12931400  | -0.55338800 |
| H | 4.89522900  | 1.71565800  | -0.86319900 |
| H | 5.90444000  | 1.26830100  | 0.52432500  |
| H | 6.64024700  | 1.54500200  | -1.06373800 |
| C | 6.94048500  | -1.04671100 | -0.51268100 |
| H | 7.08473800  | -0.98338200 | 0.57122700  |
| H | 6.93940200  | -2.09570300 | -0.80575700 |
| H | 7.78457300  | -0.54272000 | -0.99600500 |
| C | 5.43095600  | -0.44783700 | -2.44160800 |
| H | 5.28571800  | -1.48527900 | -2.75024000 |
| H | 4.55596000  | 0.14123900  | -2.73966400 |
| H | 6.30711400  | -0.04291800 | -2.96113400 |
| C | 4.54812500  | -5.16155700 | 1.11015100  |
| H | 5.32153000  | -4.89837100 | 0.38880300  |
| H | 4.82749000  | -4.75991500 | 2.08997800  |
| H | 4.49753500  | -6.25276500 | 1.19295100  |
| C | 2.14324200  | -5.07310500 | 1.70828400  |
| H | 2.36567400  | -4.68402200 | 2.70760600  |
| H | 1.12754800  | -4.76660500 | 1.43583500  |
| H | 2.15525500  | -6.16609400 | 1.76217400  |
| C | 2.78164900  | -5.21068900 | -0.68596000 |
| H | 1.77004300  | -4.89346100 | -0.96185600 |
| H | 3.47598400  | -4.89603200 | -1.46538800 |
| H | 2.78675600  | -6.30501100 | -0.62344600 |
| O | 4.95159500  | -3.15341500 | -1.07320300 |

**TS3<sup>HCT-C4</sup>**

|   |            |             |            |
|---|------------|-------------|------------|
| C | 1.24113000 | -1.25978700 | 0.48617400 |
| C | 2.79143300 | -2.78290800 | 0.10538800 |

|   |             |             |             |
|---|-------------|-------------|-------------|
| C | 3.29199700  | -0.60684300 | -0.93476400 |
| H | 2.67821800  | 0.11535600  | -1.47084500 |
| N | 1.98234500  | -3.35284800 | 0.93981900  |
| N | 1.02483200  | -2.40249100 | 1.18653600  |
| N | 2.38761900  | -1.51535900 | -0.22196500 |
| C | 4.02081500  | -3.32044800 | -0.54943000 |
| H | 3.96956300  | -4.40732000 | -0.60971400 |
| H | 4.91541700  | -3.03762800 | 0.02363700  |
| C | 4.22474000  | -1.40175900 | -1.92975200 |
| O | 4.05450400  | -2.80559000 | -1.86436900 |
| C | 5.57794500  | -0.16691300 | -0.33219600 |
| C | 4.25056900  | 0.05227400  | 0.03595400  |
| C | 3.92783800  | 0.74447400  | 1.19696000  |
| C | 4.98776000  | 1.19964000  | 1.96849800  |
| C | 6.32373800  | 1.01011700  | 1.62327600  |
| C | 6.62115000  | 0.31909800  | 0.45549200  |
| C | 5.67136500  | -0.95496400 | -1.60892300 |
| H | 2.90475000  | 0.93797400  | 1.49502400  |
| H | 7.10243800  | 1.39336800  | 2.27035200  |
| H | 7.65414100  | 0.15035900  | 0.17122200  |
| H | 6.32995800  | -1.82487300 | -1.52336800 |
| H | 6.06637500  | -0.33416200 | -2.41833400 |
| C | 0.10427600  | -2.61399300 | 2.26492100  |
| C | 0.31952100  | -1.93979700 | 3.47113900  |
| C | -0.97013500 | -3.48216900 | 2.05232400  |
| C | -0.62344100 | -2.13130900 | 4.48072000  |
| C | -1.88158700 | -3.64055100 | 3.09384200  |
| C | -1.72746500 | -2.96792700 | 4.30912000  |
| H | -0.48960200 | -1.61185100 | 5.42619400  |
| H | -2.73318200 | -4.30106700 | 2.95042800  |
| C | -1.13181200 | -4.17936000 | 0.73172300  |
| H | -0.27072800 | -4.81911000 | 0.51627600  |
| H | -1.19825300 | -3.44908100 | -0.08237800 |
| H | -2.03506300 | -4.78988100 | 0.71984600  |
| C | 1.48827000  | -1.01048800 | 3.66845900  |
| H | 1.25782600  | -0.00953400 | 3.28564900  |
| H | 2.38437300  | -1.36929900 | 3.15272100  |
| H | 1.72094100  | -0.91337300 | 4.73014000  |
| H | 3.95466000  | -1.14506600 | -2.95404200 |
| C | -2.71637100 | -3.17013400 | 5.42722600  |
| H | -2.40804900 | -4.00437300 | 6.06550700  |
| H | -2.78764000 | -2.28022400 | 6.05602900  |
| H | -3.70994800 | -3.40135400 | 5.03740400  |
| N | 4.67869300  | 1.90452900  | 3.21904000  |

|   |             |             |             |
|---|-------------|-------------|-------------|
| O | 5.60679600  | 2.37937400  | 3.84947000  |
| O | 3.51062900  | 1.96989600  | 3.56158900  |
| C | -4.83549400 | 0.86930400  | 2.55344100  |
| C | -3.58619600 | 0.62539400  | 1.99528100  |
| C | -2.54117600 | 1.55491100  | 2.13725800  |
| C | -2.79123600 | 2.72886500  | 2.86481500  |
| C | -4.04089200 | 2.97141000  | 3.42499900  |
| C | -5.07055900 | 2.04486700  | 3.26802800  |
| H | -5.63262800 | 0.14313900  | 2.42446600  |
| H | -3.41792400 | -0.28349000 | 1.42259300  |
| H | -1.98762500 | 3.44846600  | 2.99510800  |
| H | -4.21212700 | 3.88693100  | 3.98232600  |
| H | -6.04861600 | 2.23647800  | 3.69664900  |
| C | -1.22952800 | 1.33736400  | 1.53609100  |
| H | -0.61042100 | 2.21508500  | 1.35806700  |
| C | -0.72569100 | 0.11593300  | 1.22859000  |
| C | 0.52547700  | -0.02068700 | 0.54504600  |
| O | 1.13531500  | 1.02988300  | 0.04836800  |
| H | -1.28954500 | -0.78126800 | 1.46322900  |
| H | 0.53866400  | 1.57288100  | -0.88929900 |
| C | 0.04988300  | 1.95131400  | -1.93942800 |
| H | 0.72640500  | 1.36469200  | -2.55547900 |
| C | -1.27222100 | 1.37977300  | -1.68974200 |
| C | -2.25669500 | 2.30251000  | -1.20409300 |
| H | -3.21514700 | 1.91095500  | -0.89769800 |
| C | -2.08048100 | 3.65604600  | -1.16658800 |
| C | -0.78273600 | 4.25287200  | -1.54862800 |
| C | 0.28475800  | 3.33555000  | -1.92171700 |
| C | -3.22696500 | 4.58888000  | -0.76580100 |
| C | 1.67094400  | 3.89681100  | -2.22851400 |
| C | -4.48188500 | 3.81609600  | -0.33720100 |
| H | -4.88678300 | 3.20992500  | -1.15489500 |
| H | -4.28846000 | 3.16314100  | 0.52141500  |
| H | -5.25478900 | 4.53326600  | -0.04460900 |
| C | -2.80933100 | 5.49316300  | 0.40827900  |
| H | -1.95054600 | 6.10837700  | 0.14414900  |
| H | -3.64747900 | 6.14528200  | 0.67726200  |
| H | -2.56238300 | 4.88606100  | 1.28374100  |
| C | -3.60063000 | 5.45922700  | -1.98219300 |
| H | -4.42573400 | 6.12747700  | -1.71259800 |
| H | -2.75026500 | 6.05892600  | -2.30638400 |
| H | -3.93192600 | 4.83033300  | -2.81518100 |
| C | 1.60635000  | 4.80624800  | -3.46990200 |
| H | 0.90281700  | 5.62296700  | -3.31184500 |

|   |             |             |             |
|---|-------------|-------------|-------------|
| H | 2.59925300  | 5.22297800  | -3.67151100 |
| H | 1.29407600  | 4.23178600  | -4.34816200 |
| C | 2.17628800  | 4.69548400  | -1.00901000 |
| H | 3.17817800  | 5.08651000  | -1.21704400 |
| H | 1.50920500  | 5.52598500  | -0.78355900 |
| H | 2.24036700  | 4.04020300  | -0.13299900 |
| C | 2.70441400  | 2.79431200  | -2.49350300 |
| H | 2.45469400  | 2.17708900  | -3.36367400 |
| H | 3.67547200  | 3.25785100  | -2.69041600 |
| H | 2.81682600  | 2.15191400  | -1.61299200 |
| O | -0.62208700 | 5.49130800  | -1.57434100 |
| C | -1.53042400 | 0.00596100  | -1.83616600 |
| C | -0.58538000 | -0.90491200 | -2.43283300 |
| H | 0.38124800  | -0.51214300 | -2.72116200 |
| C | -2.82011100 | -0.54511700 | -1.49547100 |
| H | -3.55042800 | 0.11330800  | -1.04708700 |
| C | -0.86084900 | -2.21043700 | -2.70050200 |
| C | -3.17499300 | -1.83540400 | -1.71944200 |
| C | -2.17831900 | -2.76389400 | -2.31314600 |
| C | 0.14054600  | -3.12998400 | -3.40260400 |
| C | -4.57229800 | -2.36329400 | -1.38716000 |
| C | -5.49488900 | -1.25413200 | -0.86560100 |
| H | -5.13111000 | -0.81383500 | 0.06802600  |
| H | -5.61727800 | -0.45030800 | -1.59917500 |
| H | -6.48306300 | -1.67879300 | -0.66649900 |
| C | -5.22868800 | -2.94477200 | -2.65455400 |
| H | -5.31564900 | -2.17359000 | -3.42695400 |
| H | -4.65236100 | -3.77914100 | -3.05203700 |
| H | -6.23747300 | -3.29599400 | -2.41276800 |
| C | -4.47448800 | -3.45252900 | -0.30372900 |
| H | -3.89323700 | -4.30204600 | -0.66321100 |
| H | -3.99729100 | -3.05406400 | 0.60029300  |
| H | -5.47879600 | -3.79756200 | -0.03512000 |
| C | -0.47707900 | -3.69918400 | -4.69353200 |
| H | -1.36084100 | -4.29886000 | -4.47745000 |
| H | -0.75775100 | -2.88722300 | -5.37236300 |
| H | 0.25991500  | -4.32823700 | -5.20418600 |
| C | 1.41200900  | -2.37087600 | -3.78923900 |
| H | 1.20358300  | -1.55025300 | -4.48386200 |
| H | 1.90391400  | -1.96833700 | -2.89981100 |
| H | 2.11774300  | -3.05606300 | -4.26779300 |
| C | 0.54772700  | -4.27954700 | -2.46409200 |
| H | 0.99919900  | -3.88186400 | -1.54742300 |
| H | -0.31566100 | -4.88680600 | -2.18978400 |

|   |             |             |             |
|---|-------------|-------------|-------------|
| H | 1.29075900  | -4.91617100 | -2.95701800 |
| O | -2.44059100 | -3.96300000 | -2.46959900 |

**TS3<sup>HCT-C5</sup>**

|   |             |            |             |
|---|-------------|------------|-------------|
| C | 0.06911600  | 1.52507800 | 0.80535000  |
| C | -0.79935300 | 3.53415000 | 0.64990400  |
| C | -2.44954100 | 1.73773500 | 0.33018000  |
| H | -2.42249600 | 0.75147900 | -0.13239600 |
| N | 0.43187700  | 3.74072300 | 1.00515700  |
| N | 0.96463100  | 2.48287800 | 1.11522100  |
| N | -1.07017700 | 2.20135500 | 0.50668300  |
| C | -1.90656400 | 4.49798300 | 0.37618700  |
| H | -1.50176100 | 5.47164300 | 0.10092000  |
| H | -2.53874700 | 4.61151900 | 1.26790700  |
| C | -3.27601400 | 2.75042900 | -0.54272200 |
| O | -2.63510000 | 4.00188800 | -0.72855200 |
| C | -4.39508800 | 2.38171700 | 1.57617200  |
| C | -3.17341800 | 1.71560800 | 1.65933200  |
| C | -2.72462800 | 1.16101900 | 2.84829700  |
| C | -3.54928000 | 1.31029800 | 3.95434600  |
| C | -4.78072200 | 1.95890400 | 3.90711900  |
| C | -5.20998600 | 2.50007200 | 2.70066800  |
| C | -4.63585800 | 2.89014700 | 0.18018700  |
| H | -1.78543900 | 0.62631800 | 2.92354800  |
| H | -5.37632200 | 2.03743800 | 4.80791600  |
| H | -6.16150400 | 3.01755400 | 2.64408100  |
| H | -4.97527600 | 3.92910800 | 0.14841000  |
| H | -5.39733600 | 2.28232900 | -0.31950400 |
| C | 2.21583100  | 2.31079300 | 1.80747500  |
| C | 2.17935700  | 1.83131000 | 3.12260300  |
| C | 3.39901400  | 2.62858400 | 1.13864500  |
| C | 3.40421200  | 1.61916800 | 3.75211400  |
| C | 4.59721900  | 2.39628300 | 1.81528700  |
| C | 4.61821300  | 1.88010000 | 3.11175000  |
| H | 3.40919700  | 1.23834100 | 4.77036300  |
| H | 5.53358200  | 2.61936900 | 1.31038200  |
| C | 3.36549800  | 3.18715400 | -0.25400700 |
| H | 2.91597900  | 4.18540000 | -0.25973900 |
| H | 2.76192500  | 2.55897000 | -0.91535600 |
| H | 4.37097000  | 3.25339200 | -0.67137200 |
| C | 0.88752500  | 1.53459800 | 3.83877200  |
| H | 0.52953300  | 0.52482600 | 3.60567600  |
| H | 0.09996700  | 2.24712300 | 3.57332300  |
| H | 1.03433900  | 1.58516500 | 4.91869200  |

|   |             |             |             |
|---|-------------|-------------|-------------|
| H | -3.39467600 | 2.35824400  | -1.55571500 |
| C | 5.91898600  | 1.57562900  | 3.80618100  |
| H | 5.91391400  | 1.95069600  | 4.83272700  |
| H | 6.07535900  | 0.49265400  | 3.85488500  |
| H | 6.76575700  | 2.01770500  | 3.27807400  |
| N | -3.08815600 | 0.76532400  | 5.23707600  |
| O | -3.85347600 | 0.80898600  | 6.18354200  |
| O | -1.96024000 | 0.30456100  | 5.28527900  |
| C | 5.44731700  | -2.16237900 | 1.95084400  |
| C | 4.20032800  | -1.55651100 | 1.87057400  |
| C | 3.02744100  | -2.33086500 | 1.84735200  |
| C | 3.14342600  | -3.72287800 | 1.95845700  |
| C | 4.39376400  | -4.32854000 | 2.04053900  |
| C | 5.55003000  | -3.55188900 | 2.02841100  |
| H | 6.34304700  | -1.54871900 | 1.95646200  |
| H | 4.13170300  | -0.47215700 | 1.83657000  |
| H | 2.24468400  | -4.33317400 | 1.96252000  |
| H | 4.46471000  | -5.40912200 | 2.11205300  |
| H | 6.52500900  | -4.02400600 | 2.09143600  |
| C | 1.70680700  | -1.71733800 | 1.67289400  |
| H | 0.83313200  | -2.28735900 | 1.98718300  |
| C | 1.52339200  | -0.50761600 | 1.11069700  |
| C | 0.20930300  | 0.07831900  | 0.90928900  |
| O | -0.87982900 | -0.58438800 | 1.05816800  |
| H | 2.37449400  | 0.05527300  | 0.73853900  |
| H | -1.12819300 | -1.11906200 | -0.14508400 |
| C | -2.25528400 | -1.24189500 | -1.98298900 |
| H | -2.53255100 | -0.23005500 | -2.25655200 |
| C | -0.93404800 | -1.42911100 | -1.36816700 |
| C | -0.58976600 | -2.83069700 | -1.08476100 |
| H | 0.36809300  | -2.99696400 | -0.60600100 |
| C | -1.42421000 | -3.87569000 | -1.26803500 |
| C | -2.75098100 | -3.63729700 | -1.89507100 |
| C | -3.14307200 | -2.23399000 | -2.20648300 |
| C | -1.04363700 | -5.30382700 | -0.86698800 |
| C | -4.52852200 | -1.97309300 | -2.80469600 |
| C | 0.32446900  | -5.34263300 | -0.17632800 |
| H | 1.12874100  | -4.98551300 | -0.82915400 |
| H | 0.32345600  | -4.73662300 | 0.73644400  |
| H | 0.55734000  | -6.37360100 | 0.10622800  |
| C | -2.07726400 | -5.86946600 | 0.12468200  |
| H | -3.06904900 | -5.92120600 | -0.32353800 |
| H | -1.77704000 | -6.87771300 | 0.42976600  |
| H | -2.12693600 | -5.24507000 | 1.02309100  |

|   |             |             |             |
|---|-------------|-------------|-------------|
| C | -0.97042000 | -6.19989500 | -2.11630700 |
| H | -0.67228300 | -7.21309400 | -1.82555700 |
| H | -1.93564300 | -6.25102800 | -2.62003800 |
| H | -0.22454400 | -5.81472600 | -2.81915300 |
| C | -4.65987200 | -2.68058200 | -4.16607700 |
| H | -4.53857100 | -3.75845300 | -4.06169000 |
| H | -5.64869300 | -2.47764600 | -4.59151700 |
| H | -3.90601700 | -2.30548100 | -4.86592800 |
| C | -5.61831800 | -2.48105000 | -1.84217600 |
| H | -6.60695400 | -2.26463600 | -2.26125900 |
| H | -5.53421700 | -3.55563100 | -1.68313400 |
| H | -5.54142700 | -1.97341500 | -0.87464700 |
| C | -4.77427900 | -0.47634200 | -3.03119300 |
| H | -4.05696400 | -0.04306200 | -3.73644600 |
| H | -5.77555800 | -0.33607100 | -3.44828100 |
| H | -4.72469800 | 0.08528300  | -2.09094300 |
| O | -3.51087000 | -4.57472100 | -2.14615100 |
| C | 0.15012700  | -0.48937200 | -1.73188200 |
| C | -0.12889300 | 0.79848000  | -2.28867200 |
| H | -1.15371600 | 1.15578400  | -2.27058000 |
| C | 1.50759800  | -0.92745700 | -1.81439900 |
| H | 1.74369100  | -1.90994800 | -1.42797500 |
| C | 0.81559800  | 1.59089900  | -2.88256900 |
| C | 2.52175900  | -0.18705000 | -2.35023700 |
| C | 2.22203200  | 1.14303100  | -2.90613200 |
| C | 0.45527900  | 2.91165300  | -3.56850600 |
| C | 3.96199600  | -0.70592400 | -2.39058600 |
| C | 4.07707400  | -2.12290400 | -1.81541000 |
| H | 3.75996300  | -2.16754700 | -0.76824900 |
| H | 3.48321100  | -2.84169200 | -2.39089300 |
| H | 5.12301600  | -2.44270000 | -1.85730200 |
| C | 4.46995300  | -0.75118300 | -3.84364600 |
| H | 3.84697400  | -1.42339200 | -4.44325200 |
| H | 4.45308900  | 0.24021800  | -4.29546300 |
| H | 5.49672100  | -1.13329300 | -3.86394900 |
| C | 4.86551200  | 0.22010800  | -1.55501100 |
| H | 4.86063700  | 1.23121200  | -1.96377400 |
| H | 4.52278700  | 0.25744200  | -0.51262500 |
| H | 5.89322500  | -0.16132400 | -1.55513900 |
| C | 0.89767000  | 2.86885000  | -5.04408300 |
| H | 1.97546900  | 2.73632100  | -5.12915100 |
| H | 0.39704200  | 2.04639700  | -5.56608600 |
| H | 0.61445200  | 3.80479400  | -5.53843600 |
| C | -1.05438300 | 3.16936200  | -3.55399100 |

|   |             |            |             |
|---|-------------|------------|-------------|
| H | -1.60911600 | 2.36117700 | -4.04451500 |
| H | -1.43392400 | 3.29652400 | -2.53620000 |
| H | -1.26589500 | 4.09637400 | -4.09595200 |
| C | 1.14124700  | 4.08811500 | -2.85260700 |
| H | 0.81616900  | 4.14037400 | -1.80546600 |
| H | 2.22594800  | 3.97493500 | -2.87728400 |
| H | 0.86936000  | 5.03170100 | -3.33925900 |
| O | 3.12211900  | 1.87194400 | -3.36765900 |

**M3<sub>SET</sub>**

|   |             |             |             |
|---|-------------|-------------|-------------|
| C | 0.28860500  | -0.74444600 | -0.43353100 |
| C | 1.80729700  | -2.10957200 | 0.36249700  |
| C | 2.71884900  | -0.52343500 | -1.29170400 |
| H | 2.31425100  | -0.08826300 | -2.20396600 |
| N | 0.71830100  | -2.42548100 | 0.99707100  |
| N | -0.21850100 | -1.56287000 | 0.51336200  |
| N | 1.59976500  | -1.09232600 | -0.52817600 |
| C | 3.15838700  | -2.74401300 | 0.38156800  |
| H | 3.09910600  | -3.74197300 | 0.81434400  |
| H | 3.86543000  | -2.13985900 | 0.96617100  |
| C | 3.78651400  | -1.63580900 | -1.62915000 |
| O | 3.55045200  | -2.86765200 | -0.97146800 |
| C | 4.83896500  | 0.20384000  | -0.43706500 |
| C | 3.47418200  | 0.48887500  | -0.45913900 |
| C | 2.94442600  | 1.56639200  | 0.23553000  |
| C | 3.84123700  | 2.34690000  | 0.95186200  |
| C | 5.21053200  | 2.09636600  | 0.99113800  |
| C | 5.71579400  | 1.01082900  | 0.28610900  |
| C | 5.15512200  | -1.01617100 | -1.25802700 |
| H | 1.88845000  | 1.80935400  | 0.22874400  |
| H | 5.85371300  | 2.74368300  | 1.57382900  |
| H | 6.77801100  | 0.79296300  | 0.30930900  |
| H | 5.76691400  | -1.74609400 | -0.71943500 |
| H | 5.70555200  | -0.73896900 | -2.16207800 |
| C | -1.54444600 | -1.54716600 | 1.06691700  |
| C | -1.89935700 | -0.48794000 | 1.90825000  |
| C | -2.42391600 | -2.56418200 | 0.68864800  |
| C | -3.21882800 | -0.45147000 | 2.35301600  |
| C | -3.73110900 | -2.48235600 | 1.16796000  |
| C | -4.14713300 | -1.42879500 | 1.98524400  |
| H | -3.53017100 | 0.36335100  | 3.00158000  |
| H | -4.44193000 | -3.25471500 | 0.88649400  |
| C | -1.97864400 | -3.67884100 | -0.21981000 |
| H | -1.21164300 | -4.29260800 | 0.26072800  |

|   |             |             |             |
|---|-------------|-------------|-------------|
| H | -1.54812600 | -3.28556100 | -1.14688000 |
| H | -2.82237500 | -4.31868100 | -0.47998100 |
| C | -0.91824200 | 0.58989500  | 2.28572900  |
| H | -0.85321000 | 1.35173500  | 1.49998700  |
| H | 0.08472000  | 0.18553500  | 2.44719700  |
| H | -1.23831300 | 1.08844400  | 3.20156400  |
| H | 3.73129900  | -1.87998900 | -2.68924200 |
| C | -5.57690200 | -1.32443100 | 2.44517300  |
| H | -5.63017000 | -1.10295500 | 3.51394800  |
| H | -6.08491900 | -0.51124200 | 1.91668200  |
| H | -6.12468300 | -2.24879200 | 2.25388900  |
| N | 3.31386800  | 3.48948800  | 1.70894400  |
| O | 4.10886200  | 4.19162900  | 2.30670800  |
| O | 2.10829800  | 3.67007500  | 1.69749500  |
| C | -6.14389900 | 0.86311500  | -1.32282300 |
| C | -4.77261800 | 0.67008000  | -1.25397200 |
| C | -3.88908200 | 1.65742000  | -1.73309200 |
| C | -4.42894400 | 2.83910900  | -2.26997500 |
| C | -5.80317000 | 3.02762100  | -2.33830900 |
| C | -6.66499800 | 2.03978300  | -1.86595800 |
| H | -6.81386900 | 0.09561500  | -0.94942200 |
| H | -4.39130000 | -0.24685500 | -0.81323500 |
| H | -3.75616100 | 3.60973000  | -2.63566400 |
| H | -6.20235200 | 3.94524900  | -2.75685300 |
| H | -7.73892400 | 2.18545600  | -1.91551800 |
| C | -2.44586400 | 1.51845700  | -1.67128000 |
| H | -1.88072000 | 2.40013100  | -1.96899300 |
| C | -1.78391200 | 0.40304200  | -1.22727700 |
| C | -0.38567000 | 0.29689900  | -1.14766400 |
| H | -2.35477000 | -0.45789800 | -0.90524900 |
| O | 0.46456700  | 1.20208300  | -1.68094300 |
| H | 0.03556500  | 1.69808800  | -2.39328900 |

### **M3<sub>HAT</sub>**

|   |             |             |             |
|---|-------------|-------------|-------------|
| C | 0.29702400  | -0.87424100 | -0.80176400 |
| C | 1.80510000  | -2.40160400 | -0.27066100 |
| C | 2.68585200  | -0.59899000 | -1.71036700 |
| H | 2.26154300  | -0.07095400 | -2.56225000 |
| N | 0.75992800  | -2.74881600 | 0.40964100  |
| N | -0.18167200 | -1.79166900 | 0.09497300  |
| N | 1.58930700  | -1.28712300 | -1.03110000 |
| C | 3.14209500  | -3.05755100 | -0.37326000 |
| H | 3.06862600  | -4.11518300 | -0.12084000 |
| H | 3.85880400  | -2.57901800 | 0.31001700  |

|   |             |             |             |
|---|-------------|-------------|-------------|
| C | 3.80482500  | -1.62046400 | -2.14188500 |
| O | 3.55498700  | -2.95097600 | -1.72170100 |
| C | 4.74423400  | 0.06639600  | -0.65825200 |
| C | 3.38178700  | 0.34220500  | -0.75403800 |
| C | 2.78392200  | 1.33991400  | 0.00350900  |
| C | 3.61061900  | 2.04123000  | 0.87021000  |
| C | 4.97800600  | 1.79906500  | 0.98731300  |
| C | 5.55213900  | 0.80020100  | 0.21066700  |
| C | 5.13561600  | -1.05990100 | -1.57703900 |
| H | 1.72868800  | 1.57233400  | -0.08738200 |
| H | 5.56562400  | 2.38618600  | 1.68174400  |
| H | 6.61383200  | 0.59216800  | 0.29129100  |
| H | 5.69450400  | -1.85026400 | -1.06594800 |
| H | 5.77173900  | -0.69365400 | -2.38832100 |
| C | -1.37091400 | -1.69946500 | 0.88319900  |
| C | -1.48590500 | -0.66225800 | 1.81691300  |
| C | -2.38457500 | -2.63645900 | 0.66352200  |
| C | -2.68591100 | -0.56401800 | 2.51898000  |
| C | -3.56236700 | -2.50036500 | 1.39721500  |
| C | -3.73476800 | -1.46401400 | 2.31689900  |
| H | -2.80430400 | 0.23691000  | 3.24490500  |
| H | -4.36630300 | -3.21452200 | 1.23789900  |
| C | -2.20800100 | -3.72599300 | -0.35956900 |
| H | -1.36135300 | -4.36917900 | -0.10460400 |
| H | -2.00289700 | -3.29880900 | -1.34692500 |
| H | -3.10746200 | -4.33956200 | -0.42785100 |
| C | -0.37897700 | 0.33660200  | 2.03226700  |
| H | -0.42147700 | 1.13185000  | 1.27891600  |
| H | 0.60735000  | -0.13252700 | 1.96306900  |
| H | -0.47244800 | 0.80242200  | 3.01478600  |
| H | 3.83420000  | -1.68392100 | -3.22916100 |
| C | -5.03498800 | -1.29265300 | 3.05844200  |
| H | -4.85965000 | -1.02668000 | 4.10384000  |
| H | -5.62506200 | -0.48607400 | 2.61048000  |
| H | -5.63424900 | -2.20463700 | 3.02800900  |
| N | 3.00980000  | 3.08358400  | 1.71033900  |
| O | 3.75128700  | 3.75240400  | 2.40984000  |
| O | 1.79914200  | 3.22154000  | 1.66902500  |
| C | -6.02900300 | 1.25264500  | -0.57476600 |
| C | -4.66885000 | 0.99067400  | -0.67782400 |
| C | -3.83251800 | 1.82742000  | -1.43771300 |
| C | -4.40551200 | 2.94366600  | -2.06438300 |
| C | -5.76748600 | 3.20649300  | -1.95863400 |
| C | -6.58681000 | 2.35955300  | -1.21620900 |

|   |             |             |             |
|---|-------------|-------------|-------------|
| H | -6.65845500 | 0.59578500  | 0.01806100  |
| H | -4.24729000 | 0.14060100  | -0.14596600 |
| H | -3.76918100 | 3.60501500  | -2.64646100 |
| H | -6.18964900 | 4.07438800  | -2.45552700 |
| H | -7.64920700 | 2.56303100  | -1.12943100 |
| C | -2.39449200 | 1.58352900  | -1.57916300 |
| H | -1.79139300 | 2.39553800  | -1.98086200 |
| C | -1.76897900 | 0.43670000  | -1.24996600 |
| C | -0.32350100 | 0.27643300  | -1.39336000 |
| O | 0.40565100  | 1.12378900  | -1.99325000 |
| H | -2.34502400 | -0.40648900 | -0.88501700 |

**[DQ]'**

|   |             |             |             |
|---|-------------|-------------|-------------|
| C | 2.83931700  | 1.23765300  | 0.19678900  |
| C | 1.46836200  | 1.19512400  | 0.18642400  |
| C | 0.71867300  | -0.00001500 | -0.00004800 |
| C | 1.46835900  | -1.19513400 | -0.18666500 |
| C | 2.83931400  | -1.23762000 | -0.19730400 |
| C | 3.60176600  | 0.00002800  | -0.00032800 |
| H | 0.91880600  | 2.10955000  | 0.37298400  |
| H | 0.91879100  | -2.10957600 | -0.37311700 |
| C | -0.71866800 | -0.00002600 | 0.00008400  |
| C | -1.46833600 | -1.19512000 | 0.18693100  |
| C | -1.46837500 | 1.19506500  | -0.18662600 |
| C | -2.83929000 | -1.23762700 | 0.19756000  |
| H | -0.91875200 | -2.10951500 | 0.37356700  |
| C | -2.83933000 | 1.23757000  | -0.19700800 |
| H | -0.91883000 | 2.10946200  | -0.37335900 |
| C | -3.60176100 | -0.00003100 | 0.00033600  |
| O | 4.86016100  | 0.00004500  | -0.00044600 |
| O | -4.86015600 | -0.00003500 | 0.00043600  |
| C | 3.60014900  | -2.54867500 | -0.41979200 |
| C | 4.48748400  | -2.44075600 | -1.67336900 |
| C | 4.47558900  | -2.85642000 | 0.80911600  |
| C | 2.65580900  | -3.73940000 | -0.62403600 |
| H | 3.87204100  | -2.24678400 | -2.55864800 |
| H | 5.21155800  | -1.63395900 | -1.56364700 |
| H | 5.02306000  | -3.38387100 | -1.83352400 |
| H | 3.85044200  | -2.97690400 | 1.70066000  |
| H | 5.02456300  | -3.79225200 | 0.65135000  |
| H | 5.18785800  | -2.05040600 | 0.98378400  |
| H | 3.24999900  | -4.64773700 | -0.76724300 |
| H | 2.00611500  | -3.89905400 | 0.24317600  |
| H | 2.02406000  | -3.61143300 | -1.50943500 |

|   |             |             |             |
|---|-------------|-------------|-------------|
| C | 3.60015000  | 2.54873700  | 0.41910600  |
| C | 4.48773600  | 2.44087600  | 1.67251100  |
| C | 4.47533600  | 2.85648100  | -0.80998200 |
| C | 2.65581300  | 3.73943700  | 0.62351100  |
| H | 3.87247600  | 2.24689900  | 2.55791600  |
| H | 5.21181900  | 1.63410500  | 1.56266300  |
| H | 5.02330800  | 3.38401500  | 1.83254000  |
| H | 3.85000500  | 2.97694000  | -1.70140000 |
| H | 5.02432900  | 3.79232300  | -0.65234400 |
| H | 5.18758000  | 2.05047200  | -0.98478000 |
| H | 3.25000400  | 4.64779800  | 0.76656600  |
| H | 2.00593000  | 3.89904500  | -0.24356700 |
| H | 2.02425600  | 3.61147600  | 1.50904800  |
| C | -3.60018100 | 2.54860100  | -0.41958000 |
| C | -4.47541700 | 2.85654800  | 0.80942300  |
| C | -2.65585800 | 3.73928300  | -0.62416100 |
| C | -4.48771800 | 2.44050400  | -1.67299700 |
| H | -5.18764600 | 2.05055400  | 0.98434400  |
| H | -3.85011800 | 2.97718800  | 1.70084000  |
| H | -5.02442700 | 3.79234800  | 0.65159200  |
| H | -2.02427500 | 3.61118600  | -1.50965900 |
| H | -3.25006200 | 4.64760900  | -0.76738600 |
| H | -2.00600200 | 3.89905000  | 0.24290800  |
| H | -5.02328400 | 3.38361200  | -1.83322500 |
| H | -3.87242600 | 2.24635700  | -2.55834100 |
| H | -5.21180800 | 1.63375700  | -1.56302600 |
| C | -3.60010400 | -2.54865400 | 0.42028600  |
| C | -4.48743600 | -2.44052600 | 1.67384700  |
| C | -4.47554400 | -2.85663500 | -0.80856300 |
| C | -2.65574400 | -3.73932800 | 0.62474000  |
| H | -3.87199700 | -2.24635300 | 2.55908300  |
| H | -5.21154600 | -1.63378400 | 1.56397200  |
| H | -5.02297200 | -3.38363200 | 1.83418900  |
| H | -3.85039800 | -2.97728400 | -1.70008600 |
| H | -5.02451400 | -3.79244000 | -0.65062100 |
| H | -5.18781700 | -2.05065600 | -0.98338000 |
| H | -3.24992000 | -4.64765000 | 0.76810400  |
| H | -2.00604500 | -3.89912300 | -0.24244100 |
| H | -2.02400100 | -3.61119800 | 1.51011900  |

**[DQH]**

|   |            |             |             |
|---|------------|-------------|-------------|
| C | 2.85050400 | -1.22809400 | -0.31940500 |
| C | 1.47883500 | -1.17988600 | -0.30691100 |
| C | 0.75915400 | -0.00021100 | 0.00097800  |

|   |             |             |             |
|---|-------------|-------------|-------------|
| C | 1.48080700  | 1.17814800  | 0.30923800  |
| C | 2.85251700  | 1.22436100  | 0.32136200  |
| C | 3.60267200  | -0.00238400 | 0.00079400  |
| H | 0.90960600  | -2.06091800 | -0.57665800 |
| H | 0.91294000  | 2.06015700  | 0.57837300  |
| C | -0.70844200 | 0.00236100  | -0.00057500 |
| C | -1.42770500 | 1.16633400  | -0.30480400 |
| C | -1.43190100 | -1.15667200 | 0.30259300  |
| C | -2.81659800 | 1.20660100  | -0.31930000 |
| H | -0.87319400 | 2.05626200  | -0.57257800 |
| C | -2.82335700 | -1.18912700 | 0.31282300  |
| H | -0.88216700 | -2.04857300 | 0.57318000  |
| C | -3.50137100 | 0.00989600  | -0.00564700 |
| O | 4.85252700  | -0.00330400 | 0.00031600  |
| O | -4.86104700 | 0.07614000  | -0.02799800 |
| C | 3.61573600  | 2.50175700  | 0.66791900  |
| C | 4.49026800  | 2.27149600  | 1.91492200  |
| C | 4.50004000  | 2.92025900  | -0.52297200 |
| C | 2.66451100  | 3.66557700  | 0.97399500  |
| H | 3.87122400  | 1.97581800  | 2.76821400  |
| H | 5.23676500  | 1.49842900  | 1.73616500  |
| H | 5.00311900  | 3.20347500  | 2.17566300  |
| H | 3.88563800  | 3.10302500  | -1.41072200 |
| H | 5.02434100  | 3.84986900  | -0.27694000 |
| H | 5.23659300  | 2.15152200  | -0.75492200 |
| H | 3.25609400  | 4.55589600  | 1.20577600  |
| H | 2.02339500  | 3.90448700  | 0.11912500  |
| H | 2.02784700  | 3.45477800  | 1.83930300  |
| C | 3.61199900  | -2.50605200 | -0.66768300 |
| C | 4.48481900  | -2.27571500 | -1.91590400 |
| C | 4.49779800  | -2.92630500 | 0.52145400  |
| C | 2.65922700  | -3.66871400 | -0.97322800 |
| H | 3.86475800  | -1.97859400 | -2.76795000 |
| H | 5.23240500  | -1.50359500 | -1.73765500 |
| H | 4.99630100  | -3.20800100 | -2.17825200 |
| H | 3.88471200  | -3.10912100 | 1.41011300  |
| H | 5.02085800  | -3.85620800 | 0.27389300  |
| H | 5.23542400  | -2.15841500 | 0.75273400  |
| H | 3.24958400  | -4.55954100 | -1.20616400 |
| H | 2.01890700  | -3.90731600 | -0.11765600 |
| H | 2.02180800  | -3.45674400 | -1.83769200 |
| C | -3.58080800 | -2.48250000 | 0.66470700  |
| C | -4.43464900 | -2.95472300 | -0.53290300 |
| C | -2.61595300 | -3.63583000 | 0.97785200  |

|   |             |             |             |
|---|-------------|-------------|-------------|
| C | -4.43675000 | -2.28781400 | 1.93512300  |
| H | -5.16981500 | -2.22901200 | -0.89121300 |
| H | -3.78339000 | -3.18500200 | -1.38079100 |
| H | -4.97856100 | -3.86452200 | -0.26155600 |
| H | -1.98303700 | -3.41094500 | 1.84115200  |
| H | -3.19847200 | -4.53034300 | 1.21519600  |
| H | -1.97459800 | -3.87204700 | 0.12357900  |
| H | -4.96904400 | -3.21560200 | 2.16551400  |
| H | -3.78847200 | -2.04550100 | 2.78192500  |
| H | -5.18305500 | -1.49110900 | 1.87340100  |
| C | -3.57169400 | 2.49951500  | -0.66718000 |
| C | -4.43881000 | 2.29543300  | -1.92299700 |
| C | -4.44779500 | 2.94057600  | 0.52068600  |
| C | -2.60329000 | 3.65209400  | -0.96811100 |
| H | -3.81472500 | 2.00087600  | -2.77277700 |
| H | -5.20284400 | 1.53370300  | -1.77113600 |
| H | -4.93595900 | 3.23722300  | -2.17901400 |
| H | -3.82775400 | 3.11561200  | 1.40587400  |
| H | -4.95384100 | 3.87938500  | 0.27137700  |
| H | -5.20454100 | 2.19590900  | 0.76636300  |
| H | -3.18427400 | 4.54878200  | -1.20174100 |
| H | -1.96370900 | 3.88433900  | -0.11043400 |
| H | -1.96580300 | 3.43530200  | -1.83109100 |
| H | -5.24382400 | -0.77611900 | 0.20025600  |

#### **M04**

|   |            |             |             |
|---|------------|-------------|-------------|
| C | 0.53108400 | 0.27958800  | 0.46874800  |
| C | 1.82622500 | -0.33174900 | 2.10832900  |
| C | 2.38841800 | -1.37338800 | -0.06494100 |
| H | 1.76229500 | -1.67288000 | -0.90592600 |
| N | 1.02252300 | 0.54805100  | 2.63364700  |
| N | 0.23164800 | 0.93495700  | 1.58980700  |
| N | 1.57226900 | -0.50273300 | 0.77741700  |
| C | 2.84493800 | -1.24008000 | 2.71628100  |
| H | 2.69595800 | -1.31346600 | 3.79306000  |
| H | 3.86242500 | -0.87745900 | 2.51701800  |
| C | 2.87347000 | -2.62338800 | 0.75786600  |
| O | 2.61459700 | -2.51895700 | 2.15202000  |
| C | 4.78212900 | -1.44675000 | -0.17706900 |
| C | 3.66243100 | -0.67180100 | -0.47639100 |
| C | 3.77435500 | 0.58254800  | -1.05864900 |
| C | 5.06128500 | 1.03041800  | -1.32239200 |
| C | 6.20323200 | 0.28241400  | -1.04512200 |
| C | 6.06127700 | -0.97370900 | -0.46675800 |

|   |             |             |             |
|---|-------------|-------------|-------------|
| C | 4.38301000  | -2.75731500 | 0.44751000  |
| H | 2.90400000  | 1.17840400  | -1.31018500 |
| H | 7.17809800  | 0.69292100  | -1.27631600 |
| H | 6.93857000  | -1.56802700 | -0.23520300 |
| H | 4.94006100  | -2.98637600 | 1.36073700  |
| H | 4.55521000  | -3.58178200 | -0.25134600 |
| C | -0.62891300 | 2.08492100  | 1.70055200  |
| C | -0.23526800 | 3.25526900  | 1.04425200  |
| C | -1.79229200 | 1.98066800  | 2.46673900  |
| C | -1.08773700 | 4.35356400  | 1.14969200  |
| C | -2.60668900 | 3.10776600  | 2.53611000  |
| C | -2.27635700 | 4.29516000  | 1.87795300  |
| H | -0.81006200 | 5.27941400  | 0.65301000  |
| H | -3.52313200 | 3.05627400  | 3.11837000  |
| C | -2.13323900 | 0.70174700  | 3.17672000  |
| H | -1.47098700 | 0.54249900  | 4.03338600  |
| H | -2.01307400 | -0.16455400 | 2.51938200  |
| H | -3.16348800 | 0.72133300  | 3.53539300  |
| C | 1.05336100  | 3.34833300  | 0.26585700  |
| H | 0.95937500  | 2.90024100  | -0.72908600 |
| H | 1.87492300  | 2.84467700  | 0.78551100  |
| H | 1.33327400  | 4.39385300  | 0.12976800  |
| H | 2.30889000  | -3.50209800 | 0.44447200  |
| C | -3.19787100 | 5.48449000  | 1.94260000  |
| H | -2.66509400 | 6.41043400  | 1.71738000  |
| H | -4.00722400 | 5.37843500  | 1.21334600  |
| H | -3.65483500 | 5.57608300  | 2.93062600  |
| N | 5.22211900  | 2.36363700  | -1.91623500 |
| O | 6.34786600  | 2.72485500  | -2.21149100 |
| O | 4.22013300  | 3.03873100  | -2.07668300 |
| C | -5.87247000 | 0.55551000  | -1.70035000 |
| C | -4.51591400 | 0.48570800  | -1.39718800 |
| C | -3.55885900 | 0.50646200  | -2.42343100 |
| C | -3.99994300 | 0.57369000  | -3.75573500 |
| C | -5.35268500 | 0.63301900  | -4.05678800 |
| C | -6.29409200 | 0.62782700  | -3.02528900 |
| H | -6.60258800 | 0.54160600  | -0.89765800 |
| H | -4.20233000 | 0.41520500  | -0.36106100 |
| H | -3.26288400 | 0.57719500  | -4.55477800 |
| H | -5.67693700 | 0.68553100  | -5.09097400 |
| H | -7.35345700 | 0.67718000  | -3.25633500 |
| C | -2.12603400 | 0.45543000  | -2.16798300 |
| H | -1.48161400 | 0.48011600  | -3.04485900 |
| C | -1.50675700 | 0.48544400  | -0.95649700 |

|   |             |             |             |
|---|-------------|-------------|-------------|
| C | -0.07519300 | 0.43077800  | -0.90438400 |
| O | 0.72912400  | 0.54047600  | -1.83571200 |
| H | -2.05531500 | 0.42917800  | -0.02117600 |
| C | -0.71224700 | -2.36038900 | -2.17748100 |
| C | -2.06376000 | -2.34595600 | -2.50702500 |
| C | -2.78989900 | -2.41486900 | -1.27284000 |
| N | -1.77537600 | -2.43017200 | -0.29778600 |
| H | -2.50762900 | -2.38607900 | -3.49131800 |
| N | -0.50756600 | -2.35994800 | -0.85985500 |
| C | -1.88460300 | -2.49286300 | 1.09221900  |
| C | -3.12730200 | -2.48507400 | 1.75043600  |
| C | -0.71211900 | -2.57651400 | 1.86600800  |
| C | -3.17167400 | -2.55691700 | 3.14068700  |
| H | -4.02914600 | -2.43290700 | 1.15698800  |
| C | -0.77963700 | -2.63401200 | 3.25203100  |
| H | 0.24383500  | -2.63455300 | 1.36625700  |
| C | -2.01023900 | -2.62494700 | 3.90688900  |
| H | -4.14133900 | -2.55323900 | 3.63070600  |
| H | 0.14732900  | -2.70298600 | 3.81578700  |
| H | -2.06287700 | -2.67514700 | 4.98938700  |
| N | -4.06297800 | -2.44975300 | -0.98772600 |
| H | -4.56973900 | -2.40541500 | -1.87189100 |
| C | 0.45325200  | -2.32859800 | -3.11997700 |
| H | 0.85863300  | -1.31566100 | -3.20646200 |
| H | 1.25014400  | -2.99034800 | -2.76766200 |
| H | 0.14812300  | -2.66337800 | -4.11354100 |

**TS4RR**

|   |            |             |             |
|---|------------|-------------|-------------|
| C | 1.14971700 | 0.28565800  | -0.47630100 |
| C | 2.44678100 | 1.75245600  | -1.45424200 |
| C | 3.06012900 | 1.31799800  | 0.89668300  |
| H | 2.46881100 | 1.09663500  | 1.78277400  |
| N | 1.61501500 | 1.38068900  | -2.38090900 |
| N | 0.82342700 | 0.45673500  | -1.76262100 |
| N | 2.19869800 | 1.10929900  | -0.27382300 |
| C | 3.50463600 | 2.80495700  | -1.45999000 |
| H | 3.35304000 | 3.48929600  | -2.29403800 |
| H | 4.50419700 | 2.35567800  | -1.54142900 |
| C | 3.62552500 | 2.78907400  | 0.91800800  |
| O | 3.34340100 | 3.53030100  | -0.25671900 |
| C | 5.45415300 | 1.18577700  | 0.95372200  |
| C | 4.28622300 | 0.43801200  | 0.81706800  |
| C | 4.31454300 | -0.93590200 | 0.62434000  |
| C | 5.56975700 | -1.52536600 | 0.55892000  |

|   |             |             |             |
|---|-------------|-------------|-------------|
| C | 6.75866700  | -0.81032700 | 0.68949400  |
| C | 6.69979300  | 0.56257000  | 0.89386400  |
| C | 5.14657100  | 2.64222100  | 1.17033500  |
| H | 3.40556900  | -1.52276500 | 0.54956000  |
| H | 7.70431200  | -1.33375800 | 0.62720800  |
| H | 7.61425800  | 1.13694500  | 0.99659200  |
| H | 5.70761300  | 3.30298600  | 0.50243100  |
| H | 5.39288700  | 2.93618100  | 2.19524700  |
| C | -0.22096100 | -0.19549300 | -2.50704200 |
| C | 0.02022200  | -1.47351200 | -3.00631200 |
| C | -1.44464400 | 0.46954700  | -2.62648000 |
| C | -1.03844700 | -2.10733200 | -3.65819900 |
| C | -2.46991300 | -0.20929200 | -3.27873600 |
| C | -2.28626200 | -1.49760900 | -3.79128300 |
| H | -0.88627800 | -3.10695000 | -4.05647100 |
| H | -3.44111500 | 0.27112500  | -3.37141900 |
| C | -1.64348400 | 1.82117900  | -1.99930000 |
| H | -1.04756500 | 2.58536000  | -2.50955800 |
| H | -1.33335400 | 1.81075700  | -0.94659100 |
| H | -2.69429800 | 2.11815400  | -2.03467900 |
| C | 1.34801700  | -2.15169200 | -2.79976000 |
| H | 1.46647600  | -2.45567400 | -1.75309900 |
| H | 2.17996200  | -1.48717100 | -3.04997900 |
| H | 1.42141100  | -3.04722900 | -3.41809100 |
| H | 3.13855100  | 3.35052900  | 1.71450300  |
| C | -3.43613300 | -2.22271700 | -4.43953900 |
| H | -3.09038200 | -3.08008800 | -5.01998100 |
| H | -4.12852900 | -2.59055000 | -3.67529100 |
| H | -3.99883400 | -1.55842300 | -5.10002800 |
| N | 5.64632400  | -2.97471200 | 0.33739400  |
| O | 6.75020000  | -3.49097600 | 0.31517600  |
| O | 4.60137500  | -3.58211300 | 0.18303300  |
| C | -4.95290300 | -2.02601900 | 0.03573100  |
| C | -3.68428900 | -1.52556100 | 0.30443800  |
| C | -2.79608300 | -2.23267300 | 1.12898000  |
| C | -3.22425300 | -3.44109000 | 1.69248700  |
| C | -4.49442400 | -3.94223200 | 1.42402500  |
| C | -5.36238200 | -3.23698200 | 0.59291500  |
| H | -5.62717700 | -1.46333200 | -0.60328100 |
| H | -3.38504900 | -0.56603500 | -0.11161500 |
| H | -2.54635900 | -3.99592200 | 2.33654100  |
| H | -4.80607700 | -4.88531800 | 1.86183200  |
| H | -6.35390600 | -3.62630700 | 0.38487500  |
| C | -1.43627400 | -1.73004700 | 1.39074100  |

|   |             |             |             |
|---|-------------|-------------|-------------|
| H | -0.85183200 | -2.26629900 | 2.13302700  |
| C | -0.74596700 | -1.05905100 | 0.38327200  |
| C | 0.56678800  | -0.61409300 | 0.58328200  |
| O | 1.30887200  | -0.83928100 | 1.56955600  |
| H | -1.29351700 | -0.72417100 | -0.48431400 |
| C | -3.14336900 | -0.27322000 | 3.31393500  |
| C | -1.75011600 | -0.13442300 | 3.02499700  |
| C | -1.65612400 | 1.02814600  | 2.18220200  |
| N | -2.98858000 | 1.33986500  | 1.89706800  |
| H | -0.93025800 | -0.48597900 | 3.63602500  |
| N | -3.87218000 | 0.55060000  | 2.60500300  |
| C | -3.49202100 | 2.27641000  | 0.97981500  |
| C | -2.79499700 | 3.45687900  | 0.69519600  |
| C | -4.71689700 | 2.02286600  | 0.35016600  |
| C | -3.31775500 | 4.35774700  | -0.22735100 |
| H | -1.84518200 | 3.63842800  | 1.18054600  |
| C | -5.22927200 | 2.93813400  | -0.56385200 |
| H | -5.25001700 | 1.11050800  | 0.59372900  |
| C | -4.53266400 | 4.10800700  | -0.86299200 |
| H | -2.76916700 | 5.26901700  | -0.44556400 |
| H | -6.17959500 | 2.73209400  | -1.04693300 |
| H | -4.93368900 | 4.81738800  | -1.57934200 |
| N | -0.63367500 | 1.64073700  | 1.65341200  |
| H | 0.19426600  | 1.21064200  | 2.06496900  |
| C | -3.77690900 | -1.24652100 | 4.25328100  |
| H | -3.63573300 | -0.93415100 | 5.29301400  |
| H | -4.84733200 | -1.31959500 | 4.05155100  |
| H | -3.32896300 | -2.23714400 | 4.14004100  |

**TS4RR'**

|   |             |             |             |
|---|-------------|-------------|-------------|
| C | -0.80194500 | -0.12771000 | 0.35582900  |
| C | -2.13480700 | 0.95358000  | 1.70377700  |
| C | -2.63007600 | 1.29937700  | -0.69434900 |
| H | -1.98419100 | 1.34830700  | -1.56871500 |
| N | -1.36536400 | 0.26125400  | 2.49119800  |
| N | -0.55011200 | -0.42237800 | 1.63281500  |
| N | -1.83366900 | 0.72830400  | 0.39021500  |
| C | -3.16483100 | 1.99614700  | 1.98996000  |
| H | -3.03939700 | 2.38866700  | 2.99874900  |
| H | -4.17884600 | 1.58628400  | 1.88782500  |
| C | -3.15722000 | 2.72381300  | -0.28931500 |
| O | -2.92189200 | 3.04916700  | 1.07405200  |
| C | -5.02153000 | 1.27328200  | -0.86296500 |
| C | -3.87829000 | 0.47796600  | -0.91393300 |

|   |             |             |             |
|---|-------------|-------------|-------------|
| C | -3.94455600 | -0.89236300 | -1.11999700 |
| C | -5.21493900 | -1.43512900 | -1.25651900 |
| C | -6.38104200 | -0.67311400 | -1.21341900 |
| C | -6.28285000 | 0.69941400  | -1.01826800 |
| C | -4.66523700 | 2.71932100  | -0.63952100 |
| H | -3.04820800 | -1.50088800 | -1.18685300 |
| H | -7.34064000 | -1.16120700 | -1.32782900 |
| H | -7.17944200 | 1.30859500  | -0.97947200 |
| H | -5.24293600 | 3.18598300  | 0.16387700  |
| H | -4.84643200 | 3.30213000  | -1.54789800 |
| C | 0.33123000  | -1.44737100 | 2.12390100  |
| C | 0.01575900  | -2.77695800 | 1.82881000  |
| C | 1.45130200  | -1.06272300 | 2.86400200  |
| C | 0.89305800  | -3.75223300 | 2.29964200  |
| C | 2.29480500  | -2.07851600 | 3.30836700  |
| C | 2.03640800  | -3.42245000 | 3.02977900  |
| H | 0.67610700  | -4.79636300 | 2.08954400  |
| H | 3.17882900  | -1.81129400 | 3.88160600  |
| C | 1.73079200  | 0.38788700  | 3.14514100  |
| H | 1.00701200  | 0.79838300  | 3.85555900  |
| H | 1.65659300  | 0.99406400  | 2.23536500  |
| H | 2.73202300  | 0.51335200  | 3.56042400  |
| C | -1.20998100 | -3.14872700 | 1.03322200  |
| H | -1.06951100 | -2.94884500 | -0.03506000 |
| H | -2.08988100 | -2.58724200 | 1.36414700  |
| H | -1.42489400 | -4.21215900 | 1.14658500  |
| H | -2.60930500 | 3.48455000  | -0.84542400 |
| C | 2.98965700  | -4.49547100 | 3.48623100  |
| H | 2.47182200  | -5.44386300 | 3.64426000  |
| H | 3.76424400  | -4.66218800 | 2.73080100  |
| H | 3.48919700  | -4.21169700 | 4.41509900  |
| N | -5.33247200 | -2.88571100 | -1.44878200 |
| O | -6.44594000 | -3.35024700 | -1.62292900 |
| O | -4.31000300 | -3.54817100 | -1.41805300 |
| C | 5.62344900  | -1.31350300 | -0.63461900 |
| C | 4.29790600  | -0.90126700 | -0.70761700 |
| C | 3.50095600  | -1.26474800 | -1.80289200 |
| C | 4.06381200  | -2.05386800 | -2.81303100 |
| C | 5.38744500  | -2.47730300 | -2.73242000 |
| C | 6.17317800  | -2.10390100 | -1.64405600 |
| H | 6.23235800  | -1.01555600 | 0.21306600  |
| H | 3.88730300  | -0.26744700 | 0.07335400  |
| H | 3.45405000  | -2.33588600 | -3.66732500 |
| H | 5.80598500  | -3.09456900 | -3.52104800 |

|   |             |             |             |
|---|-------------|-------------|-------------|
| H | 7.20759400  | -2.42611900 | -1.58184800 |
| C | 2.09377400  | -0.83931800 | -1.91742700 |
| H | 1.57903400  | -1.16378400 | -2.81961500 |
| C | 1.28369400  | -0.66574000 | -0.79358600 |
| C | -0.11681800 | -0.61573100 | -0.90039800 |
| O | -0.86691300 | -0.91743400 | -1.85331300 |
| H | 1.73063500  | -0.42431500 | 0.16499500  |
| C | 3.69295900  | 1.65821500  | -2.39935900 |
| C | 2.39704000  | 1.21724500  | -2.83645200 |
| C | 1.47268100  | 1.89876700  | -1.96765300 |
| N | 2.28224300  | 2.46613000  | -0.97774300 |
| H | 2.15025000  | 0.93424200  | -3.85122100 |
| N | 3.63054200  | 2.32854700  | -1.28161700 |
| C | 1.92572700  | 2.93530000  | 0.29465600  |
| C | 0.58387000  | 3.10126100  | 0.67943600  |
| C | 2.93982600  | 3.24153200  | 1.21797600  |
| C | 0.28100900  | 3.54590800  | 1.96453500  |
| H | -0.20189000 | 2.89816600  | -0.03445300 |
| C | 2.61425300  | 3.69042000  | 2.49180400  |
| H | 3.97287700  | 3.11612500  | 0.92217200  |
| C | 1.28450700  | 3.84274900  | 2.88181600  |
| H | -0.76480300 | 3.67661000  | 2.22857100  |
| H | 3.41520600  | 3.91831700  | 3.18893000  |
| H | 1.03768400  | 4.19134800  | 3.87910800  |
| N | 0.17449300  | 1.92264200  | -1.94029100 |
| H | -0.14497700 | 1.37035700  | -2.73834700 |
| C | 5.01027300  | 1.39790700  | -3.05283300 |
| H | 5.04632300  | 1.86580000  | -4.04170100 |
| H | 5.81454200  | 1.80865500  | -2.43990900 |
| H | 5.17622000  | 0.32484000  | -3.18471300 |

### TS4RR"

|   |             |             |             |
|---|-------------|-------------|-------------|
| C | -0.31560800 | -1.27580700 | -0.40838100 |
| C | 0.81648300  | -2.74808200 | -1.55337500 |
| C | 1.95017100  | -0.55411900 | -1.29268000 |
| H | 1.52879400  | 0.45202400  | -1.23536000 |
| N | -0.29720100 | -3.35163600 | -1.25267200 |
| N | -0.98828400 | -2.41967200 | -0.52813100 |
| N | 0.84607300  | -1.48034100 | -1.04465500 |
| C | 1.93066400  | -3.11835400 | -2.47547400 |
| H | 1.65979300  | -3.98487500 | -3.07703900 |
| H | 2.85052900  | -3.33674500 | -1.91665500 |
| C | 2.56520000  | -0.82418400 | -2.71737500 |
| O | 2.08245900  | -2.00642500 | -3.34099900 |

|   |             |             |             |
|---|-------------|-------------|-------------|
| C | 4.30002100  | -0.94178700 | -1.02129400 |
| C | 3.10146700  | -0.75103600 | -0.33462400 |
| C | 3.05463400  | -0.69881100 | 1.05109100  |
| C | 4.26144600  | -0.87650800 | 1.71504400  |
| C | 5.47280100  | -1.09679500 | 1.06345500  |
| C | 5.49311300  | -1.12466800 | -0.32496000 |
| C | 4.09597700  | -0.85892400 | -2.50846400 |
| H | 2.12804400  | -0.49447400 | 1.57791000  |
| H | 6.37583000  | -1.22760900 | 1.64640700  |
| H | 6.42802000  | -1.27742000 | -0.85368500 |
| H | 4.53713000  | -1.69724500 | -3.05624900 |
| H | 4.55042900  | 0.05859200  | -2.89683500 |
| C | -2.27156300 | -2.72754200 | 0.04305000  |
| C | -2.35021200 | -2.91251300 | 1.42610600  |
| C | -3.37058300 | -2.80262400 | -0.81279600 |
| C | -3.60864300 | -3.18758400 | 1.95373400  |
| C | -4.60777700 | -3.07959200 | -0.23205600 |
| C | -4.74411400 | -3.27167200 | 1.14312900  |
| H | -3.70658600 | -3.33927400 | 3.02573500  |
| H | -5.48505800 | -3.13910400 | -0.87070200 |
| C | -3.22197500 | -2.57527500 | -2.29378200 |
| H | -2.63666100 | -3.37394100 | -2.75834200 |
| H | -2.70320200 | -1.63224500 | -2.50108700 |
| H | -4.20062500 | -2.53912000 | -2.77424500 |
| C | -1.12713700 | -2.81045700 | 2.29970800  |
| H | -0.75554000 | -1.78103100 | 2.34992000  |
| H | -0.31509200 | -3.43610100 | 1.91582400  |
| H | -1.35836600 | -3.13441600 | 3.31509700  |
| H | 2.26575100  | -0.02104300 | -3.39182300 |
| C | -6.09123000 | -3.54881800 | 1.75737600  |
| H | -6.04535400 | -4.41295300 | 2.42537400  |
| H | -6.42470400 | -2.69309800 | 2.35221300  |
| H | -6.84442100 | -3.74329400 | 0.99174900  |
| N | 4.26689900  | -0.79257400 | 3.17844200  |
| O | 5.31498000  | -1.01741800 | 3.76169200  |
| O | 3.22495600  | -0.49712700 | 3.73733900  |
| C | -6.05188200 | 2.04418500  | -0.37916000 |
| C | -4.73758200 | 1.58712800  | -0.36483200 |
| C | -3.78936300 | 2.16705500  | 0.48800200  |
| C | -4.20101900 | 3.20938000  | 1.33065200  |
| C | -5.51376100 | 3.66494000  | 1.31898700  |
| C | -6.44583400 | 3.08425700  | 0.45996100  |
| H | -6.77266500 | 1.58396200  | -1.04764000 |
| H | -4.45634500 | 0.76685700  | -1.01890200 |

|   |             |             |             |
|---|-------------|-------------|-------------|
| H | -3.47385800 | 3.66215300  | 2.00058800  |
| H | -5.81125300 | 4.47181800  | 1.98107500  |
| H | -7.47175200 | 3.43745200  | 0.44716100  |
| C | -2.37710500 | 1.72955200  | 0.52968200  |
| H | -1.80396500 | 2.10393700  | 1.37692200  |
| C | -1.96610500 | 0.48075300  | 0.02867500  |
| C | -0.68861400 | -0.00444500 | 0.31692900  |
| O | 0.19503700  | 0.45762500  | 1.06880800  |
| H | -2.58556800 | -0.08361600 | -0.65860900 |
| C | -1.01062100 | 2.64219400  | -1.84740100 |
| C | -1.48220100 | 3.34423700  | -0.69594000 |
| C | -0.28991200 | 3.58313500  | 0.11288400  |
| N | 0.70629300  | 2.86122000  | -0.55390700 |
| H | -2.33441000 | 4.01000800  | -0.68097300 |
| N | 0.24806600  | 2.30553900  | -1.73508900 |
| C | 2.05628400  | 2.71828600  | -0.20269400 |
| C | 2.44048400  | 2.68577700  | 1.14271100  |
| C | 3.02355200  | 2.57755900  | -1.20659600 |
| C | 3.78282400  | 2.52571100  | 1.46962300  |
| H | 1.67964100  | 2.78220400  | 1.90499300  |
| C | 4.36026600  | 2.40135200  | -0.86068900 |
| H | 2.71350600  | 2.60913500  | -2.24610000 |
| C | 4.75008800  | 2.37813700  | 0.47683200  |
| H | 4.07058200  | 2.49385700  | 2.51688800  |
| H | 5.10416900  | 2.29266400  | -1.64523100 |
| H | 5.79316800  | 2.23736000  | 0.74119500  |
| N | -0.08906900 | 4.24472600  | 1.20320100  |
| H | -0.96194200 | 4.71156200  | 1.45015700  |
| C | -1.84262500 | 2.14489100  | -2.97987300 |
| H | -2.38332200 | 2.96337500  | -3.46282500 |
| H | -1.21821600 | 1.64251100  | -3.72097700 |
| H | -2.58899200 | 1.43293400  | -2.60650400 |

**TS4RR'''**

|   |             |             |             |
|---|-------------|-------------|-------------|
| C | -1.86919800 | 0.61166600  | -0.74743000 |
| C | -3.95646600 | 0.73326800  | -1.38760600 |
| C | -3.08612200 | -1.57778100 | -1.27827600 |
| H | -2.10598200 | -2.01418500 | -1.46753100 |
| N | -3.62737500 | 1.95912900  | -1.10420000 |
| N | -2.32777700 | 1.86597800  | -0.69518900 |
| N | -2.91051100 | -0.12283200 | -1.18124100 |
| C | -5.20881300 | 0.15774000  | -1.96336100 |
| H | -5.78441500 | 0.93185400  | -2.46972100 |
| H | -5.82857400 | -0.29173300 | -1.17508300 |

|   |             |             |             |
|---|-------------|-------------|-------------|
| C | -4.13561900 | -1.92895500 | -2.39888000 |
| O | -4.80082500 | -0.79299000 | -2.92807400 |
| C | -4.85577900 | -2.84364900 | -0.26634400 |
| C | -3.70621400 | -2.10179900 | -0.00192800 |
| C | -3.26308000 | -1.87382100 | 1.29292200  |
| C | -4.03188600 | -2.41458400 | 2.31369300  |
| C | -5.18190900 | -3.16844200 | 2.08898000  |
| C | -5.59754700 | -3.38801400 | 0.78139700  |
| C | -5.11283300 | -2.93608400 | -1.74627400 |
| H | -2.35219900 | -1.32080200 | 1.49456100  |
| H | -5.73363800 | -3.56264600 | 2.93318600  |
| H | -6.49421400 | -3.96570600 | 0.58434600  |
| H | -6.14452700 | -2.69555700 | -2.01965800 |
| H | -4.91083800 | -3.94928400 | -2.10694600 |
| C | -1.65337100 | 3.01928400  | -0.16092300 |
| C | -1.42102900 | 3.06521800  | 1.21391800  |
| C | -1.23748500 | 4.01331300  | -1.05178900 |
| C | -0.71948000 | 4.16981800  | 1.69868000  |
| C | -0.54263000 | 5.09326800  | -0.51541100 |
| C | -0.26913000 | 5.18300900  | 0.85376100  |
| H | -0.51898200 | 4.23394500  | 2.76470900  |
| H | -0.20053800 | 5.88125900  | -1.18188600 |
| C | -1.51219300 | 3.89477400  | -2.52712100 |
| H | -2.58567100 | 3.93732900  | -2.73162900 |
| H | -1.14358200 | 2.94110400  | -2.91986000 |
| H | -1.02235200 | 4.70216900  | -3.07249400 |
| C | -1.87140300 | 1.96281000  | 2.13595400  |
| H | -1.16762300 | 1.12257800  | 2.10995600  |
| H | -2.86085400 | 1.58373800  | 1.86252500  |
| H | -1.91741200 | 2.32389800  | 3.16430500  |
| H | -3.62444500 | -2.36484800 | -3.25659600 |
| C | 0.50600600  | 6.35571400  | 1.39375200  |
| H | 0.56106200  | 6.32683500  | 2.48323900  |
| H | 1.52760700  | 6.35378000  | 1.00211600  |
| H | 0.04340300  | 7.30034500  | 1.09489900  |
| N | -3.61539800 | -2.16739200 | 3.69974400  |
| O | -4.23263400 | -2.72745200 | 4.58907900  |
| O | -2.67995500 | -1.40867300 | 3.88545800  |
| C | 3.71673400  | 3.69207900  | 0.58826800  |
| C | 2.77390000  | 2.80551800  | 0.08456000  |
| C | 2.84553300  | 1.43513800  | 0.39040700  |
| C | 3.89965700  | 0.98919900  | 1.19894300  |
| C | 4.83101500  | 1.88185900  | 1.72254900  |
| C | 4.74322000  | 3.23569400  | 1.41840000  |

|   |             |             |             |
|---|-------------|-------------|-------------|
| H | 3.64933100  | 4.74677000  | 0.33983700  |
| H | 1.96976400  | 3.18788400  | -0.53803000 |
| H | 3.98229600  | -0.07292100 | 1.41826600  |
| H | 5.63120000  | 1.51347500  | 2.35648600  |
| H | 5.47076700  | 3.93471300  | 1.81821300  |
| C | 1.85299400  | 0.46325700  | -0.08915100 |
| H | 1.88882500  | -0.51337600 | 0.39082300  |
| C | 0.56361700  | 0.88466500  | -0.51170800 |
| C | -0.52681300 | 0.03555900  | -0.36979700 |
| O | -0.56576400 | -1.15654200 | 0.02883600  |
| H | 0.41353800  | 1.88327800  | -0.89784700 |
| C | 2.34852400  | -1.64556700 | -2.00552200 |
| C | 2.89733200  | -0.31676800 | -1.93557800 |
| C | 4.25329200  | -0.49954900 | -1.45126800 |
| N | 4.27486200  | -1.84581300 | -1.04706600 |
| H | 2.61667800  | 0.51043600  | -2.57410700 |
| N | 3.12954600  | -2.52344700 | -1.44475300 |
| C | 5.28024700  | -2.56043500 | -0.37832200 |
| C | 6.38638000  | -1.91309500 | 0.19345400  |
| C | 5.16245400  | -3.95395200 | -0.25558200 |
| C | 7.34861700  | -2.66094600 | 0.86668900  |
| H | 6.47856900  | -0.84033900 | 0.09511700  |
| C | 6.13422100  | -4.67927700 | 0.42168600  |
| H | 4.30374700  | -4.44761400 | -0.69079800 |
| C | 7.23748100  | -4.04298700 | 0.98785800  |
| H | 8.19856800  | -2.14572500 | 1.30470700  |
| H | 6.02457600  | -5.75651700 | 0.50534200  |
| H | 7.99497700  | -4.61403300 | 1.51427600  |
| N | 5.25037100  | 0.31185900  | -1.32656000 |
| H | 4.94935300  | 1.22652100  | -1.66425700 |
| C | 1.04873000  | -2.03849300 | -2.62723600 |
| H | 1.15752700  | -2.11903000 | -3.71387000 |
| H | 0.71477100  | -3.00104900 | -2.23619300 |
| H | 0.28842500  | -1.28221000 | -2.42125600 |

**TS4RS**

|   |             |             |             |
|---|-------------|-------------|-------------|
| C | -0.12129200 | -1.37646500 | -0.57775100 |
| C | 1.16138600  | -2.74836400 | -1.69191000 |
| C | 2.21474500  | -0.57289600 | -1.18469100 |
| H | 1.77367700  | 0.42770600  | -1.11711600 |
| N | 0.04927600  | -3.40376300 | -1.52431600 |
| N | -0.73614700 | -2.53694500 | -0.81539600 |
| N | 1.09764000  | -1.50948800 | -1.12155800 |
| C | 2.39024100  | -3.05262300 | -2.48541700 |

|   |             |             |             |
|---|-------------|-------------|-------------|
| H | 2.21410300  | -3.89160100 | -3.15765400 |
| H | 3.23154900  | -3.29236300 | -1.82079400 |
| C | 2.97177100  | -0.72234100 | -2.54939100 |
| O | 2.64283100  | -1.90313200 | -3.27229800 |
| C | 4.53348500  | -0.89105000 | -0.69787200 |
| C | 3.25854000  | -0.85611900 | -0.13240500 |
| C | 3.05932800  | -1.02249600 | 1.23119900  |
| C | 4.19649500  | -1.22923600 | 2.00231800  |
| C | 5.48508300  | -1.26471100 | 1.47357300  |
| C | 5.65523000  | -1.09262500 | 0.10445200  |
| C | 4.47205900  | -0.65314100 | -2.18359500 |
| H | 2.07114700  | -0.96679700 | 1.67598600  |
| H | 6.32809800  | -1.42754800 | 2.13304500  |
| H | 6.64976300  | -1.11947600 | -0.32799700 |
| H | 5.04107600  | -1.38536300 | -2.76349800 |
| H | 4.87275800  | 0.33778200  | -2.42156200 |
| C | -2.03114600 | -2.94662400 | -0.34371000 |
| C | -2.18392300 | -3.20759200 | 1.01879200  |
| C | -3.06743000 | -3.05031900 | -1.27490800 |
| C | -3.45569000 | -3.58455500 | 1.44933200  |
| C | -4.31630600 | -3.43098300 | -0.79182700 |
| C | -4.52844400 | -3.69530500 | 0.56406000  |
| H | -3.60898600 | -3.79734000 | 2.50392400  |
| H | -5.14492000 | -3.51878800 | -1.49000200 |
| C | -2.83356300 | -2.74987000 | -2.73132300 |
| H | -2.18839000 | -3.50533500 | -3.18898000 |
| H | -2.33806400 | -1.78131100 | -2.86069500 |
| H | -3.77973400 | -2.72710200 | -3.27337600 |
| C | -1.02945600 | -3.08615200 | 1.97946500  |
| H | -0.75814300 | -2.03863700 | 2.15073300  |
| H | -0.14127400 | -3.60047700 | 1.59867700  |
| H | -1.29134800 | -3.52534200 | 2.94282100  |
| H | 2.67718600  | 0.09171400  | -3.21238200 |
| C | -5.90040900 | -4.07043200 | 1.05944700  |
| H | -5.84960000 | -4.55624600 | 2.03572300  |
| H | -6.52601200 | -3.17809500 | 1.16158300  |
| H | -6.40069000 | -4.74457300 | 0.36021300  |
| N | 4.03015000  | -1.42025500 | 3.44868200  |
| O | 5.03467900  | -1.55902300 | 4.12554200  |
| O | 2.89632600  | -1.43411100 | 3.89405300  |
| C | -6.10130900 | 1.64760900  | -0.14254400 |
| C | -4.76128800 | 1.30323500  | -0.27010800 |
| C | -3.81478800 | 1.75935400  | 0.65869300  |
| C | -4.25099400 | 2.56705300  | 1.71605500  |

|   |             |             |             |
|---|-------------|-------------|-------------|
| C | -5.59433000 | 2.90845900  | 1.84705300  |
| C | -6.52433200 | 2.45064500  | 0.91702700  |
| H | -6.82064900 | 1.29153500  | -0.87331400 |
| H | -4.44390400 | 0.68501300  | -1.10598900 |
| H | -3.52419300 | 2.92609300  | 2.44024000  |
| H | -5.91356100 | 3.53212700  | 2.67611900  |
| H | -7.57160700 | 2.71761400  | 1.01471200  |
| C | -2.38890300 | 1.39495900  | 0.57692700  |
| H | -1.73494300 | 1.86811300  | 1.30702700  |
| C | -1.93599700 | 0.21287400  | 0.02089600  |
| C | -0.59656900 | -0.19305800 | 0.23434700  |
| O | 0.21934100  | 0.24109500  | 1.06757100  |
| H | -2.55484800 | -0.36580300 | -0.65683500 |
| C | -1.69893700 | 4.24780500  | -0.35439200 |
| C | -1.80287600 | 2.99848700  | -1.03481200 |
| C | -0.45962700 | 2.52084700  | -1.15771800 |
| N | 0.28099100  | 3.40607200  | -0.37238500 |
| H | -2.62278500 | 2.67847600  | -1.66197200 |
| N | -0.47031000 | 4.47655100  | 0.05264700  |
| C | 1.69028200  | 3.48381000  | -0.26922100 |
| C | 2.41254700  | 2.42565900  | 0.28286100  |
| C | 2.35037600  | 4.63719500  | -0.69720000 |
| C | 3.80120500  | 2.50784800  | 0.36634600  |
| H | 1.86576700  | 1.57074400  | 0.66988100  |
| C | 3.73499300  | 4.72005400  | -0.59043100 |
| H | 1.76645500  | 5.45469900  | -1.10664800 |
| C | 4.46595500  | 3.65236200  | -0.07016600 |
| H | 4.36214800  | 1.68390600  | 0.80114200  |
| H | 4.24593300  | 5.61789100  | -0.92362200 |
| H | 5.54645900  | 3.71885400  | 0.00682800  |
| N | 0.05360900  | 1.48473800  | -1.77536100 |
| H | -0.68939600 | 1.06373800  | -2.33175900 |
| C | -2.79094900 | 5.23400900  | -0.08549500 |
| H | -3.63177900 | 4.76491500  | 0.43282900  |
| H | -2.40923300 | 6.05436700  | 0.52518100  |
| H | -3.17491900 | 5.64806700  | -1.02335000 |

#### TS4RS'

|   |            |            |            |
|---|------------|------------|------------|
| C | 2.63383300 | 2.20894400 | 0.87043800 |
| C | 2.47091100 | 4.21210200 | 1.72738700 |
| C | 0.31885900 | 3.28798100 | 0.93667500 |
| H | 0.05786400 | 2.67606600 | 0.07448000 |
| N | 3.71528200 | 3.87484400 | 1.90618700 |
| N | 3.79970000 | 2.62231100 | 1.37422300 |

|   |             |             |             |
|---|-------------|-------------|-------------|
| N | 1.77966500  | 3.22805200  | 1.08015500  |
| C | 1.73756100  | 5.47521300  | 2.04369600  |
| H | 2.43575200  | 6.30733600  | 2.12934100  |
| H | 1.18558200  | 5.37391400  | 2.98877100  |
| C | -0.15938300 | 4.77861900  | 0.77480300  |
| O | 0.88062700  | 5.72675500  | 0.94845100  |
| C | -1.24315900 | 3.75407800  | 2.69762300  |
| C | -0.33495000 | 2.81361700  | 2.21365700  |
| C | -0.08290900 | 1.62635400  | 2.88527700  |
| C | -0.78380200 | 1.41929600  | 4.06561100  |
| C | -1.70859800 | 2.32906400  | 4.57226500  |
| C | -1.94143600 | 3.51120700  | 3.87942000  |
| C | -1.31157100 | 4.95613500  | 1.79444400  |
| H | 0.62656000  | 0.88313700  | 2.53437500  |
| H | -2.22225100 | 2.10516300  | 5.49862100  |
| H | -2.64986000 | 4.23638300  | 4.26485200  |
| H | -1.20060800 | 5.90219600  | 2.33285300  |
| H | -2.27417900 | 4.99297500  | 1.27572900  |
| C | 5.05155100  | 1.91239200  | 1.41028800  |
| C | 5.43223900  | 1.34298800  | 2.62657500  |
| C | 5.78904700  | 1.79247100  | 0.23080700  |
| C | 6.62183900  | 0.61501900  | 2.63946700  |
| C | 6.97233600  | 1.06086600  | 0.30121600  |
| C | 7.39824000  | 0.46105200  | 1.48976100  |
| H | 6.94194200  | 0.15035300  | 3.56805900  |
| H | 7.57080300  | 0.94640700  | -0.59964600 |
| C | 5.30174500  | 2.37861600  | -1.06631900 |
| H | 4.92684000  | 3.39734200  | -0.93496100 |
| H | 4.48802200  | 1.77023800  | -1.48081800 |
| H | 6.10730100  | 2.39773700  | -1.80187300 |
| C | 4.56669600  | 1.47571000  | 3.85091600  |
| H | 3.55446800  | 1.10161900  | 3.65689700  |
| H | 4.47806300  | 2.52050200  | 4.16164000  |
| H | 4.98593700  | 0.90251900  | 4.67834300  |
| H | -0.50144300 | 4.94096000  | -0.24643700 |
| C | 8.66673700  | -0.35028200 | 1.51213100  |
| H | 8.89259700  | -0.70703800 | 2.51842100  |
| H | 8.57692500  | -1.21866500 | 0.85237900  |
| H | 9.51424500  | 0.24276000  | 1.15767400  |
| N | -0.52444300 | 0.18693700  | 4.82061900  |
| O | -1.18063200 | -0.01371400 | 5.82683600  |
| O | 0.33886500  | -0.56322000 | 4.40028600  |
| C | 5.16939000  | -4.04965000 | 0.78381600  |
| C | 4.56904400  | -2.80844700 | 0.61894100  |

|   |             |             |             |
|---|-------------|-------------|-------------|
| C | 3.26514400  | -2.71329400 | 0.10456600  |
| C | 2.59433700  | -3.88852300 | -0.26334200 |
| C | 3.19841400  | -5.12986700 | -0.10162500 |
| C | 4.48439800  | -5.21285900 | 0.42905900  |
| H | 6.17670600  | -4.11339200 | 1.18290500  |
| H | 5.11870700  | -1.90751900 | 0.88128200  |
| H | 1.60119100  | -3.81037900 | -0.70079300 |
| H | 2.67017100  | -6.02879400 | -0.40377500 |
| H | 4.95807500  | -6.18110800 | 0.55677400  |
| C | 2.60001300  | -1.43406400 | -0.10266400 |
| H | 1.61744200  | -1.46752300 | -0.56870400 |
| C | 2.98919600  | -0.24208300 | 0.48787800  |
| C | 2.25826400  | 0.92339800  | 0.16831800  |
| O | 1.31375300  | 1.01766900  | -0.63333200 |
| H | 3.84533300  | -0.18862300 | 1.14692200  |
| C | 4.30994200  | -1.70361800 | -2.65460300 |
| C | 3.03474900  | -1.09682400 | -2.59024100 |
| C | 2.09155600  | -2.11719000 | -2.94126000 |
| N | 2.89654000  | -3.24296300 | -3.18103000 |
| H | 2.78606200  | -0.05293800 | -2.46134800 |
| N | 4.24380300  | -2.97381600 | -2.97729200 |
| C | 2.51801800  | -4.56659400 | -3.43575800 |
| C | 1.17343000  | -4.93426700 | -3.60051300 |
| C | 3.51024800  | -5.55931700 | -3.51325100 |
| C | 0.84531100  | -6.26781800 | -3.83438400 |
| H | 0.41255500  | -4.16927600 | -3.53344500 |
| C | 3.16003300  | -6.88160900 | -3.75129100 |
| H | 4.54415000  | -5.27436600 | -3.37186700 |
| C | 1.82546100  | -7.25244100 | -3.91288800 |
| H | -0.20082800 | -6.53358100 | -3.95775500 |
| H | 3.94341700  | -7.63210700 | -3.80802500 |
| H | 1.55788400  | -8.28777200 | -4.09715300 |
| N | 0.78307300  | -2.12657000 | -2.96212600 |
| H | 0.48370300  | -1.17762500 | -2.73221500 |
| C | 5.61685300  | -1.06942400 | -2.30727400 |
| H | 5.58064700  | -0.68776300 | -1.27907200 |
| H | 6.42597100  | -1.79876800 | -2.38134100 |
| H | 5.83974200  | -0.22115700 | -2.96306400 |

**TS4RS"**

|   |             |             |             |
|---|-------------|-------------|-------------|
| C | 1.11256900  | 0.93530300  | -0.68500300 |
| C | 0.38656500  | 2.16226500  | -2.33363100 |
| C | -1.36496300 | 0.80277700  | -1.20146100 |
| H | -1.34439900 | -0.21853400 | -0.81738400 |

|   |             |             |             |
|---|-------------|-------------|-------------|
| N | 1.63774300  | 2.49528300  | -2.19636300 |
| N | 2.07001500  | 1.72944900  | -1.15212300 |
| N | 0.02814800  | 1.20588800  | -1.42365600 |
| C | -0.64908700 | 2.57176700  | -3.33100000 |
| H | -0.17657100 | 2.91117100  | -4.25241500 |
| H | -1.26812500 | 3.38507700  | -2.92842700 |
| C | -2.19036800 | 0.94208900  | -2.53433600 |
| O | -1.40926500 | 1.41523700  | -3.62184100 |
| C | -3.17061900 | 2.32686600  | -0.79255300 |
| C | -2.03298700 | 1.74901700  | -0.23539600 |
| C | -1.61197900 | 2.04561400  | 1.05405400  |
| C | -2.39563400 | 2.94056200  | 1.76774700  |
| C | -3.55591500 | 3.51998000  | 1.25384000  |
| C | -3.94663300 | 3.21164300  | -0.04199200 |
| C | -3.38289800 | 1.87485200  | -2.21058000 |
| H | -0.72285000 | 1.60534200  | 1.49653800  |
| H | -4.12639000 | 4.20369700  | 1.86970300  |
| H | -4.83941100 | 3.66140300  | -0.46303300 |
| H | -3.41242800 | 2.71651100  | -2.91081800 |
| H | -4.32624300 | 1.33559000  | -2.32128700 |
| C | 3.43248200  | 1.80117400  | -0.69185500 |
| C | 3.72696500  | 2.68467400  | 0.34516000  |
| C | 4.37894800  | 0.98536000  | -1.31512300 |
| C | 5.05775400  | 2.74788500  | 0.75786900  |
| C | 5.69208500  | 1.08716700  | -0.86527400 |
| C | 6.04681300  | 1.96156300  | 0.16619200  |
| H | 5.32431900  | 3.42604700  | 1.56403200  |
| H | 6.45637800  | 0.46829500  | -1.32852600 |
| C | 3.97695900  | 0.03134600  | -2.40795600 |
| H | 3.46089500  | 0.55188200  | -3.22005800 |
| H | 3.29742900  | -0.73578300 | -2.01953800 |
| H | 4.85300700  | -0.46990400 | -2.82093600 |
| C | 2.64593200  | 3.50381800  | 0.99564400  |
| H | 1.95798600  | 2.84208500  | 1.53302800  |
| H | 2.06964400  | 4.06401700  | 0.25273500  |
| H | 3.07465500  | 4.21277900  | 1.70488900  |
| H | -2.53521700 | -0.04725400 | -2.84204800 |
| C | 7.47640900  | 2.03471100  | 0.63546700  |
| H | 7.62139200  | 2.85614200  | 1.33938700  |
| H | 7.76516500  | 1.10498200  | 1.13501100  |
| H | 8.15739400  | 2.17719800  | -0.20786500 |
| N | -1.98104300 | 3.29654600  | 3.12909200  |
| O | -2.71266800 | 4.02347300  | 3.77793600  |
| O | -0.92136400 | 2.85107300  | 3.53705500  |

|   |             |             |             |
|---|-------------|-------------|-------------|
| C | 1.41721000  | -5.71746600 | -0.99694700 |
| C | 1.19736600  | -4.37731600 | -0.68663500 |
| C | 1.63985200  | -3.84782700 | 0.53477700  |
| C | 2.27243100  | -4.70870200 | 1.44941800  |
| C | 2.47922600  | -6.04518100 | 1.14483600  |
| C | 2.05554800  | -6.55306400 | -0.08684200 |
| H | 1.07416000  | -6.11010200 | -1.94865900 |
| H | 0.68690200  | -3.74038300 | -1.40083200 |
| H | 2.60333800  | -4.30996200 | 2.40515300  |
| H | 2.97391900  | -6.69403800 | 1.86032500  |
| H | 2.22133600  | -7.59787800 | -0.32937300 |
| C | 1.46557900  | -2.44634600 | 0.89228800  |
| H | 1.88628600  | -2.13965700 | 1.84787000  |
| C | 1.13020600  | -1.42470700 | 0.02411200  |
| C | 1.29168900  | -0.07656700 | 0.43544000  |
| O | 1.65953600  | 0.37865900  | 1.52349700  |
| H | 0.78427500  | -1.61667500 | -0.98699100 |
| C | -0.97202900 | -1.56857500 | 2.44899000  |
| C | -0.65571000 | -2.92776900 | 2.23812800  |
| C | -1.37097900 | -3.33263400 | 1.06101000  |
| N | -1.96057900 | -2.13327100 | 0.61551300  |
| H | -0.16529100 | -3.60344000 | 2.92426500  |
| N | -1.71523500 | -1.07504000 | 1.47842100  |
| C | -2.97060200 | -1.99044700 | -0.34410600 |
| C | -2.99254300 | -2.79438500 | -1.49384400 |
| C | -3.95720300 | -1.00717300 | -0.17019200 |
| C | -4.00115200 | -2.62058800 | -2.43780900 |
| H | -2.23283200 | -3.55527900 | -1.61324100 |
| C | -4.96063400 | -0.85414100 | -1.12113400 |
| H | -3.92839200 | -0.38931500 | 0.71996000  |
| C | -4.99119600 | -1.65413600 | -2.26314900 |
| H | -4.00969300 | -3.25030300 | -3.32234900 |
| H | -5.73030300 | -0.10391900 | -0.96003600 |
| H | -5.77642900 | -1.53033200 | -3.00139600 |
| N | -1.51039100 | -4.46057000 | 0.42782300  |
| H | -0.99040600 | -5.16920500 | 0.94575100  |
| C | -0.50287800 | -0.69249800 | 3.56720800  |
| H | -0.72099700 | -1.15291200 | 4.53509200  |
| H | 0.57537100  | -0.52556100 | 3.49747900  |
| H | -0.99799700 | 0.28015800  | 3.52081300  |

**TS4RS'''**

|   |             |            |             |
|---|-------------|------------|-------------|
| C | -1.93239800 | 0.69434800 | -0.67135900 |
| C | -4.07322800 | 0.57323900 | -1.08368600 |

|   |             |             |             |
|---|-------------|-------------|-------------|
| C | -2.87901700 | -1.59536800 | -1.22110800 |
| H | -1.88346200 | -1.86770300 | -1.58056100 |
| N | -3.87111700 | 1.80946300  | -0.73156800 |
| N | -2.53145100 | 1.86080700  | -0.46557800 |
| N | -2.90460200 | -0.13936100 | -1.07004200 |
| C | -5.29559000 | -0.15111100 | -1.54792700 |
| H | -6.02810700 | 0.54856100  | -1.94875500 |
| H | -5.75060100 | -0.70846300 | -0.71724800 |
| C | -4.01223900 | -2.05809100 | -2.21193900 |
| O | -4.87884700 | -1.00349100 | -2.59797300 |
| C | -4.28906800 | -3.14504000 | -0.05425500 |
| C | -3.23014800 | -2.25180900 | 0.09501400  |
| C | -2.64271300 | -2.00235200 | 1.32792600  |
| C | -3.16581800 | -2.69877300 | 2.40850600  |
| C | -4.21287200 | -3.61088500 | 2.29807800  |
| C | -4.78246100 | -3.83700900 | 1.05077000  |
| C | -4.75191600 | -3.20738300 | -1.48516600 |
| H | -1.81936200 | -1.30242700 | 1.45944900  |
| H | -4.57062300 | -4.11907600 | 3.18470400  |
| H | -5.60710800 | -4.53394400 | 0.94736900  |
| H | -5.83431700 | -3.08746900 | -1.59019100 |
| H | -4.48975200 | -4.17041600 | -1.93337600 |
| C | -1.90017800 | 3.07155700  | -0.01029700 |
| C | -1.81698300 | 3.28239800  | 1.36765900  |
| C | -1.39040700 | 3.95082800  | -0.96583000 |
| C | -1.17614800 | 4.44584600  | 1.78640200  |
| C | -0.76194200 | 5.10156400  | -0.49286300 |
| C | -0.64415500 | 5.36081700  | 0.87379800  |
| H | -1.08165000 | 4.63727900  | 2.85224900  |
| H | -0.34380900 | 5.80405100  | -1.20899900 |
| C | -1.47767700 | 3.63661000  | -2.43512300 |
| H | -2.50322400 | 3.40134900  | -2.73384700 |
| H | -0.85235300 | 2.77025100  | -2.67999100 |
| H | -1.12950000 | 4.48233600  | -3.02904500 |
| C | -2.37171400 | 2.27763500  | 2.34022600  |
| H | -1.83238600 | 1.32958900  | 2.24257400  |
| H | -3.43325200 | 2.09019300  | 2.14996400  |
| H | -2.26367300 | 2.63688600  | 3.36433300  |
| H | -3.56670000 | -2.39510600 | -3.14680400 |
| C | 0.03554000  | 6.61271000  | 1.36294800  |
| H | 0.62190600  | 6.41287700  | 2.26287600  |
| H | 0.69930100  | 7.02528800  | 0.60053700  |
| H | -0.70466900 | 7.37908200  | 1.61427600  |
| N | -2.59447100 | -2.44513300 | 3.73806300  |

|   |             |             |             |
|---|-------------|-------------|-------------|
| O | -2.99300300 | -3.12461600 | 4.66789900  |
| O | -1.75905400 | -1.56449800 | 3.83613100  |
| C | 2.72051800  | -1.51038300 | -4.79635200 |
| C | 2.05618900  | -0.83671200 | -3.78371300 |
| C | 2.28973100  | -1.16058300 | -2.43376300 |
| C | 3.23349700  | -2.15353600 | -2.13823500 |
| C | 3.88150100  | -2.84811600 | -3.15915500 |
| C | 3.62761500  | -2.53018400 | -4.48694700 |
| H | 2.53422100  | -1.24653800 | -5.83261800 |
| H | 1.36253400  | -0.03966900 | -4.03550900 |
| H | 3.44374300  | -2.39055000 | -1.09922400 |
| H | 4.59678900  | -3.62500700 | -2.90949600 |
| H | 4.13795800  | -3.06180700 | -5.28369300 |
| C | 1.58748900  | -0.49597900 | -1.34003800 |
| H | 1.85457300  | -0.80791300 | -0.33129700 |
| C | 0.29884100  | 0.04973800  | -1.48928700 |
| C | -0.48726600 | 0.32560400  | -0.36494600 |
| O | -0.21253600 | 0.25707500  | 0.84721300  |
| H | -0.14135700 | 0.19280000  | -2.47090300 |
| C | 2.76245200  | 1.70152400  | 0.26620300  |
| C | 3.18414900  | 1.27733400  | -1.03201900 |
| C | 4.33336400  | 0.43717800  | -0.80478000 |
| N | 4.34964100  | 0.27531900  | 0.59111100  |
| H | 2.96884000  | 1.76442700  | -1.97295800 |
| N | 3.41465600  | 1.08675700  | 1.21810100  |
| C | 5.18498500  | -0.52252900 | 1.38568400  |
| C | 6.04348700  | -1.48198300 | 0.82545300  |
| C | 5.14399700  | -0.37403800 | 2.78169100  |
| C | 6.84072600  | -2.26299300 | 1.65802900  |
| H | 6.07810700  | -1.59143900 | -0.24948800 |
| C | 5.94766900  | -1.16479500 | 3.59230500  |
| H | 4.47356700  | 0.35909400  | 3.20970100  |
| C | 6.80539800  | -2.11585400 | 3.04154600  |
| H | 7.50075100  | -2.99961000 | 1.20889500  |
| H | 5.90130100  | -1.03265800 | 4.66931000  |
| H | 7.43373800  | -2.72863900 | 3.67948100  |
| N | 5.18469800  | -0.12521800 | -1.60883800 |
| H | 4.92345100  | 0.13466000  | -2.56050300 |
| C | 1.71449100  | 2.71864900  | 0.57777300  |
| H | 1.36127700  | 2.60298700  | 1.60333000  |
| H | 2.11113700  | 3.73258000  | 0.45307800  |
| H | 0.86252900  | 2.61752800  | -0.09986400 |

TS4SR

|   |             |             |             |
|---|-------------|-------------|-------------|
| C | 1.13512500  | 2.32904400  | -0.40029300 |
| C | 1.42648800  | 4.49762400  | -0.36881600 |
| C | -0.94283700 | 3.75743000  | -0.83538900 |
| H | -1.13711500 | 3.32762200  | -1.81600400 |
| N | 2.59837200  | 4.00016600  | -0.10201300 |
| N | 2.40223800  | 2.65153600  | -0.12180600 |
| N | 0.49187300  | 3.50905800  | -0.53885000 |
| C | 1.08820900  | 5.94467400  | -0.55261100 |
| H | 1.87065200  | 6.41844400  | -1.14706300 |
| H | 1.04108100  | 6.45390200  | 0.41705800  |
| C | -1.17582000 | 5.29217200  | -0.74866900 |
| O | -0.11712200 | 6.05948800  | -1.27383100 |
| C | -2.20951400 | 4.28120300  | 1.12641100  |
| C | -1.87218600 | 3.24486800  | 0.24762400  |
| C | -2.43863300 | 1.98204000  | 0.37788300  |
| C | -3.30564600 | 1.79578500  | 1.45022500  |
| C | -3.62683500 | 2.79708600  | 2.36193200  |
| C | -3.07988400 | 4.06221300  | 2.18975200  |
| C | -1.55395700 | 5.57123800  | 0.72189100  |
| H | -2.22068600 | 1.19051800  | -0.33215300 |
| H | -4.31200400 | 2.58028500  | 3.17170800  |
| H | -3.34342200 | 4.86804800  | 2.86616700  |
| H | -0.67343200 | 5.75672700  | 1.34723200  |
| H | -2.21089900 | 6.43773700  | 0.81791700  |
| C | 3.52460500  | 1.77182200  | 0.07540800  |
| C | 3.94441800  | 1.53041700  | 1.38598500  |
| C | 4.12500400  | 1.20087300  | -1.04539000 |
| C | 5.01755800  | 0.66050300  | 1.55897700  |
| C | 5.19507800  | 0.33468200  | -0.81806100 |
| C | 5.65005300  | 0.05203200  | 0.46953400  |
| H | 5.36673200  | 0.44894500  | 2.56676800  |
| H | 5.68116500  | -0.13147300 | -1.67078400 |
| C | 3.61618900  | 1.48347700  | -2.43225200 |
| H | 3.47785500  | 2.55658000  | -2.59435400 |
| H | 2.64960500  | 0.99366700  | -2.59485900 |
| H | 4.31639200  | 1.10884700  | -3.17994800 |
| C | 3.24013100  | 2.17278900  | 2.55123500  |
| H | 2.17315300  | 1.92410900  | 2.54939800  |
| H | 3.32166600  | 3.26281600  | 2.50700900  |
| H | 3.66817900  | 1.83094800  | 3.49428200  |
| H | -2.03757100 | 5.51328100  | -1.38189200 |
| C | 6.80051000  | -0.89353800 | 0.69602600  |
| H | 7.61560300  | -0.39414600 | 1.22744400  |
| H | 6.48680800  | -1.74526600 | 1.30649900  |

|   |             |             |             |
|---|-------------|-------------|-------------|
| H | 7.19055000  | -1.27674900 | -0.24841000 |
| N | -3.94162500 | 0.48268200  | 1.62371600  |
| O | -4.57291600 | 0.28662800  | 2.64832600  |
| O | -3.80450900 | -0.33812800 | 0.73396100  |
| C | 3.34910400  | -3.68605500 | 0.99835700  |
| C | 2.63835100  | -2.53708500 | 0.65278700  |
| C | 1.44835700  | -2.62837600 | -0.07728400 |
| C | 1.00106800  | -3.89882100 | -0.46672500 |
| C | 1.70746800  | -5.04417400 | -0.12085900 |
| C | 2.88543900  | -4.94189100 | 0.61900300  |
| H | 4.27125400  | -3.59562000 | 1.56448600  |
| H | 3.03346500  | -1.56754600 | 0.94228300  |
| H | 0.08172400  | -3.98205300 | -1.04327600 |
| H | 1.33975400  | -6.01739800 | -0.43017600 |
| H | 3.43941600  | -5.83451100 | 0.89123900  |
| C | 0.64402900  | -1.42950600 | -0.46844600 |
| H | 0.35300800  | -1.46113500 | -1.52156800 |
| C | 1.11016600  | -0.09722000 | -0.09294500 |
| C | 0.54965600  | 0.98640700  | -0.71771500 |
| O | -0.39245600 | 1.01321600  | -1.57963800 |
| H | 1.83475200  | 0.04075700  | 0.69701900  |
| C | -1.32324700 | -2.68921600 | 1.17935700  |
| C | -1.15334200 | -1.58895100 | 0.21845100  |
| C | -2.01758100 | -2.00455500 | -0.92464400 |
| N | -2.47846700 | -3.27911100 | -0.56356900 |
| H | -1.30214600 | -0.57737800 | 0.58242500  |
| N | -2.04669600 | -3.64535200 | 0.70743600  |
| C | -3.23303300 | -4.20287100 | -1.30463000 |
| C | -3.86140700 | -3.83641500 | -2.50304600 |
| C | -3.36193200 | -5.51796100 | -0.83217300 |
| C | -4.59909800 | -4.78349300 | -3.20829100 |
| H | -3.75856200 | -2.82366000 | -2.86595900 |
| C | -4.10752100 | -6.44439600 | -1.55000000 |
| H | -2.87674900 | -5.79602200 | 0.09417100  |
| C | -4.73148500 | -6.08896500 | -2.74427600 |
| H | -5.08045900 | -4.48616800 | -4.13528900 |
| H | -4.19704800 | -7.45711400 | -1.16864800 |
| H | -5.31052400 | -6.81740100 | -3.30201600 |
| N | -2.25869800 | -1.40687500 | -2.02783100 |
| H | -1.73406000 | -0.52446800 | -2.01374700 |
| C | -0.70497200 | -2.75693300 | 2.53253800  |
| H | -1.02459800 | -1.90658000 | 3.14288300  |
| H | -0.98711900 | -3.68366900 | 3.03381300  |
| H | 0.38617800  | -2.71190300 | 2.44436200  |

**TS4SR'**

|   |             |             |             |
|---|-------------|-------------|-------------|
| C | 0.12645900  | 1.14503500  | -1.05857900 |
| C | -1.25248500 | 2.78825600  | -1.49896500 |
| C | -2.36386400 | 0.61591900  | -1.45065400 |
| H | -2.07174800 | -0.43433400 | -1.54536600 |
| N | -0.12452700 | 3.37421900  | -1.22472100 |
| N | 0.72085900  | 2.33945700  | -0.94310300 |
| N | -1.14549700 | 1.42923500  | -1.39656700 |
| C | -2.54226000 | 3.32694600  | -2.03277500 |
| H | -2.37508300 | 4.29941700  | -2.49548700 |
| H | -3.29112300 | 3.43237100  | -1.23836300 |
| C | -3.26827900 | 1.10578400  | -2.63093200 |
| O | -2.95235800 | 2.42958600  | -3.05021500 |
| C | -4.53953800 | 1.11716600  | -0.58674100 |
| C | -3.21447800 | 0.88251000  | -0.22600600 |
| C | -2.79784900 | 0.88905800  | 1.09559300  |
| C | -3.77698200 | 1.15361100  | 2.04457000  |
| C | -5.11258500 | 1.39403100  | 1.72561400  |
| C | -5.50010100 | 1.37299800  | 0.39013100  |
| C | -4.70406500 | 1.00713300  | -2.07951200 |
| H | -1.78249900 | 0.61776900  | 1.38008300  |
| H | -5.82211500 | 1.59357100  | 2.51872800  |
| H | -6.53413300 | 1.55930900  | 0.12011500  |
| H | -5.34279100 | 1.77808600  | -2.51751700 |
| H | -5.13092500 | 0.02896700  | -2.32994000 |
| C | 2.05531500  | 2.61571000  | -0.48525500 |
| C | 2.23108900  | 2.78633000  | 0.88935600  |
| C | 3.09758600  | 2.63640600  | -1.41058900 |
| C | 3.53533000  | 2.97782000  | 1.34142800  |
| C | 4.38246200  | 2.83138100  | -0.90815600 |
| C | 4.61877900  | 2.99165400  | 0.45931100  |
| H | 3.70965600  | 3.10851700  | 2.40621700  |
| H | 5.22060100  | 2.84572000  | -1.59999700 |
| C | 2.83798800  | 2.39730300  | -2.87254200 |
| H | 2.01528200  | 3.01796400  | -3.23796600 |
| H | 2.56778800  | 1.34867700  | -3.04136300 |
| H | 3.72878700  | 2.61711500  | -3.46220200 |
| C | 1.05676100  | 2.71001200  | 1.82873100  |
| H | 0.56235300  | 1.73419600  | 1.75069500  |
| H | 0.30960800  | 3.47389900  | 1.59204200  |
| H | 1.37838700  | 2.84867600  | 2.86147900  |
| H | -3.11904100 | 0.49052400  | -3.51848400 |
| C | 6.02611200  | 3.13998300  | 0.97499600  |

|   |             |             |             |
|---|-------------|-------------|-------------|
| H | 6.04085500  | 3.61640400  | 1.95729500  |
| H | 6.49802700  | 2.15661400  | 1.07165000  |
| H | 6.63740000  | 3.73263400  | 0.29068600  |
| N | -3.38133400 | 1.16940400  | 3.45801700  |
| O | -4.25250800 | 1.34147400  | 4.29400700  |
| O | -2.20163000 | 1.01138800  | 3.71989800  |
| C | 5.91139800  | -1.48242800 | 1.16117600  |
| C | 4.57589500  | -1.24386100 | 0.85762400  |
| C | 3.92340400  | -1.99008700 | -0.13448500 |
| C | 4.64856100  | -2.97863000 | -0.81043900 |
| C | 5.98682400  | -3.21700700 | -0.50845300 |
| C | 6.62327900  | -2.46999600 | 0.47894300  |
| H | 6.39903300  | -0.90069200 | 1.93746300  |
| H | 4.02802200  | -0.47893600 | 1.40300500  |
| H | 4.15634200  | -3.55497700 | -1.58968500 |
| H | 6.53164700  | -3.98598500 | -1.04690700 |
| H | 7.66508200  | -2.65613900 | 0.71876600  |
| C | 2.51478200  | -1.73874100 | -0.50384700 |
| H | 2.07237600  | -2.43888600 | -1.20894000 |
| C | 1.98210300  | -0.45742600 | -0.48922000 |
| C | 0.71608200  | -0.24986900 | -1.08611200 |
| O | 0.04793800  | -1.07403500 | -1.73185400 |
| H | 2.47446000  | 0.33856400  | 0.05129700  |
| C | 1.26375500  | -4.14199000 | 0.65375200  |
| C | 1.49193500  | -2.83783600 | 1.19470200  |
| C | 0.22322700  | -2.16678000 | 1.10362600  |
| N | -0.57700600 | -3.06397000 | 0.39675900  |
| H | 2.26450500  | -2.56988700 | 1.90204300  |
| N | 0.06674200  | -4.24680500 | 0.12755300  |
| C | -1.88086600 | -2.86443800 | -0.08239600 |
| C | -2.84214000 | -2.24796300 | 0.71965700  |
| C | -2.22186200 | -3.31764400 | -1.36184100 |
| C | -4.13747900 | -2.07926000 | 0.23699300  |
| H | -2.56144400 | -1.89705600 | 1.70633800  |
| C | -3.51736800 | -3.14510100 | -1.83288400 |
| H | -1.45524400 | -3.78571200 | -1.96827600 |
| C | -4.48244400 | -2.52194700 | -1.03755900 |
| H | -4.87826400 | -1.58968800 | 0.86406900  |
| H | -3.77625900 | -3.49450500 | -2.82764900 |
| H | -5.49588500 | -2.39515200 | -1.40601300 |
| N | -0.15064700 | -0.95744800 | 1.43243100  |
| H | 0.62584200  | -0.53739100 | 1.94330700  |
| C | 2.22275500  | -5.28802200 | 0.61132400  |
| H | 2.46248000  | -5.63151200 | 1.62250400  |

|   |            |             |            |
|---|------------|-------------|------------|
| H | 1.78685900 | -6.11985500 | 0.05502900 |
| H | 3.16477100 | -4.99619100 | 0.13809200 |

**TS4SR"**

|   |             |             |             |
|---|-------------|-------------|-------------|
| C | -0.62140900 | 1.74135400  | -0.26177800 |
| C | -2.28275600 | 2.59993300  | 0.88124600  |
| C | -2.99842800 | 1.64188200  | -1.25212300 |
| H | -2.50157100 | 1.42705800  | -2.19903500 |
| N | -1.23869500 | 2.77792400  | 1.63534000  |
| N | -0.21532300 | 2.23499100  | 0.91505300  |
| N | -1.95073800 | 1.96968400  | -0.28495000 |
| C | -3.68381300 | 3.10355200  | 1.00050900  |
| H | -3.74201500 | 3.87648700  | 1.76608100  |
| H | -4.37774400 | 2.29239200  | 1.25383600  |
| C | -3.99195600 | 2.84668600  | -1.38114100 |
| O | -3.98782900 | 3.70575600  | -0.24664300 |
| C | -5.22177600 | 0.81044800  | -0.99888300 |
| C | -3.87654700 | 0.49472500  | -0.78814400 |
| C | -3.49097900 | -0.72127400 | -0.23774900 |
| C | -4.52176700 | -1.60116800 | 0.08576400  |
| C | -5.86887100 | -1.32008900 | -0.11986400 |
| C | -6.22468600 | -0.09557000 | -0.67108700 |
| C | -5.36553100 | 2.18478100  | -1.59599600 |
| H | -2.44971600 | -0.99932200 | -0.07446800 |
| H | -6.61365900 | -2.05438700 | 0.15949000  |
| H | -7.26920900 | 0.14911700  | -0.83121700 |
| H | -6.15611100 | 2.78106900  | -1.13385800 |
| H | -5.58586700 | 2.11044900  | -2.66641400 |
| C | 1.10445000  | 2.18329800  | 1.48482100  |
| C | 1.35499100  | 1.15999800  | 2.40019700  |
| C | 2.06411600  | 3.10327800  | 1.06268500  |
| C | 2.65667800  | 1.05090600  | 2.88647900  |
| C | 3.34754400  | 2.95600900  | 1.58529800  |
| C | 3.66243900  | 1.93217600  | 2.48322000  |
| H | 2.88671500  | 0.25037900  | 3.58489800  |
| H | 4.12303400  | 3.65170100  | 1.27495300  |
| C | 1.73585600  | 4.16601900  | 0.05015200  |
| H | 0.78908200  | 4.66200400  | 0.28159700  |
| H | 1.64808800  | 3.72248700  | -0.94802500 |
| H | 2.52356700  | 4.91988200  | 0.01651200  |
| C | 0.25920600  | 0.21912500  | 2.81677900  |
| H | -0.22525000 | -0.22764600 | 1.94098400  |
| H | -0.50792300 | 0.74864900  | 3.39058400  |
| H | 0.65927400  | -0.59501500 | 3.42327600  |

|   |             |             |             |
|---|-------------|-------------|-------------|
| H | -3.70803200 | 3.48762600  | -2.21612400 |
| C | 5.07384700  | 1.76387500  | 2.98195600  |
| H | 5.09445800  | 1.25078500  | 3.94563500  |
| H | 5.65861700  | 1.16632800  | 2.27460900  |
| H | 5.57302800  | 2.72945200  | 3.08938100  |
| N | -4.18145900 | -2.89594100 | 0.68815300  |
| O | -5.08269500 | -3.69460500 | 0.87458800  |
| O | -3.01531500 | -3.10036400 | 0.97302100  |
| C | 5.76325100  | -0.22955700 | -1.19893400 |
| C | 4.38832900  | -0.01708100 | -1.13725100 |
| C | 3.60931000  | -0.04390200 | -2.30316500 |
| C | 4.24458000  | -0.32107900 | -3.52404300 |
| C | 5.61325500  | -0.54538300 | -3.58452000 |
| C | 6.37951900  | -0.49517200 | -2.41806300 |
| H | 6.35302000  | -0.19919500 | -0.28819600 |
| H | 3.92105900  | 0.18617600  | -0.17746000 |
| H | 3.64670700  | -0.35581800 | -4.43173800 |
| H | 6.08657100  | -0.75225400 | -4.53908700 |
| H | 7.45051600  | -0.66525200 | -2.46226500 |
| C | 2.16280500  | 0.18833700  | -2.28997500 |
| H | 1.70462500  | 0.34264600  | -3.26385300 |
| C | 1.46262500  | 0.72340700  | -1.20512300 |
| C | 0.15818500  | 1.18622700  | -1.43191200 |
| O | -0.44593000 | 1.24696600  | -2.52547600 |
| H | 1.86094400  | 0.67351400  | -0.20175100 |
| C | 0.09436900  | -1.86618200 | -2.04846500 |
| C | 1.46291700  | -2.03300300 | -2.39507000 |
| C | 2.13385600  | -2.39071700 | -1.16339900 |
| N | 1.15172700  | -2.16327800 | -0.18635600 |
| H | 1.85226600  | -2.26378000 | -3.37762600 |
| N | -0.08331900 | -1.87760900 | -0.74627800 |
| C | 1.23445100  | -2.51062500 | 1.17157400  |
| C | 2.42875900  | -2.32632100 | 1.87876800  |
| C | 0.11416400  | -3.03654700 | 1.82427300  |
| C | 2.49273100  | -2.68070800 | 3.22391000  |
| H | 3.29158500  | -1.92544900 | 1.36232300  |
| C | 0.18971600  | -3.36999000 | 3.17217300  |
| H | -0.80225100 | -3.17118600 | 1.26464100  |
| C | 1.37855700  | -3.20047100 | 3.88105400  |
| H | 3.42522500  | -2.54019900 | 3.76328800  |
| H | -0.68776800 | -3.77639300 | 3.66647600  |
| H | 1.43664900  | -3.47186800 | 4.93014000  |
| N | 3.33118700  | -2.79070000 | -0.88319200 |
| H | 3.84734400  | -2.86433600 | -1.76040300 |

|                 |             |             |             |
|-----------------|-------------|-------------|-------------|
| C               | -1.05322100 | -1.65788800 | -2.98459200 |
| H               | -1.27970900 | -2.58459100 | -3.52157600 |
| H               | -1.94361000 | -1.35552100 | -2.42846700 |
| H               | -0.82046900 | -0.87747900 | -3.71090700 |
| <b>TS4SR'''</b> |             |             |             |
| C               | 2.06719600  | -0.81549800 | -0.77633400 |
| C               | 4.18767700  | -1.32387200 | -0.95675900 |
| C               | 3.64580100  | 0.95236900  | -1.75441000 |
| H               | 2.77689800  | 1.36903600  | -2.26070000 |
| N               | 3.65071500  | -2.35483100 | -0.37477500 |
| N               | 2.33150500  | -2.01995300 | -0.25958500 |
| N               | 3.25519300  | -0.35985800 | -1.22056300 |
| C               | 5.57962600  | -1.08507400 | -1.44176400 |
| H               | 6.10990800  | -2.02990400 | -1.55443000 |
| H               | 6.13114400  | -0.44580100 | -0.73865200 |
| C               | 4.89065500  | 0.81150000  | -2.70922900 |
| O               | 5.45581500  | -0.48957400 | -2.71837500 |
| C               | 5.39865300  | 2.34851000  | -0.89484800 |
| C               | 4.12844800  | 1.84052900  | -0.63001600 |
| C               | 3.45720200  | 2.12491500  | 0.55047000  |
| C               | 4.12199900  | 2.93343500  | 1.46125600  |
| C               | 5.38911700  | 3.46544500  | 1.22985200  |
| C               | 6.03430800  | 3.17140800  | 0.03475200  |
| C               | 5.89739300  | 1.88980800  | -2.23863800 |
| H               | 2.45741000  | 1.75217500  | 0.74167200  |
| H               | 5.84983900  | 4.09134200  | 1.98350300  |
| H               | 7.02316500  | 3.57108900  | -0.16212900 |
| H               | 6.90879700  | 1.47407800  | -2.20194700 |
| H               | 5.91821400  | 2.72506200  | -2.94503200 |
| C               | 1.44472200  | -2.89161200 | 0.46348800  |
| C               | 1.07739000  | -2.52815000 | 1.75863900  |
| C               | 1.00154700  | -4.05572200 | -0.17168700 |
| C               | 0.21864200  | -3.39464400 | 2.43800300  |
| C               | 0.13891100  | -4.87851000 | 0.54591800  |
| C               | -0.26238100 | -4.56340100 | 1.84904200  |
| H               | -0.09024300 | -3.13774700 | 3.44806100  |
| H               | -0.23253500 | -5.78630900 | 0.07729500  |
| C               | 1.42120900  | -4.37232000 | -1.58190900 |
| H               | 2.50406100  | -4.50944300 | -1.64918700 |
| H               | 1.15076400  | -3.55600000 | -2.26026600 |
| H               | 0.93308600  | -5.28280300 | -1.93077800 |
| C               | 1.53639800  | -1.23442600 | 2.37655600  |
| H               | 0.97344700  | -0.39011400 | 1.95787600  |
| H               | 2.59977000  | -1.05045600 | 2.19503900  |

|   |             |             |             |
|---|-------------|-------------|-------------|
| H | 1.36754200  | -1.24364300 | 3.45428800  |
| H | 4.57923800  | 0.97636800  | -3.73989600 |
| C | -1.19994100 | -5.47804300 | 2.59260200  |
| H | -1.46149700 | -5.06850100 | 3.56968900  |
| H | -2.12246900 | -5.62963900 | 2.02530700  |
| H | -0.74391100 | -6.46070300 | 2.74349000  |
| N | 3.45627300  | 3.23367200  | 2.73510200  |
| O | 4.00954600  | 4.00478300  | 3.49952100  |
| O | 2.38964500  | 2.68919900  | 2.96113000  |
| C | -4.40334900 | -2.57898500 | -0.96486700 |
| C | -3.15584200 | -1.98600200 | -0.80089900 |
| C | -2.90562800 | -0.70171200 | -1.30673000 |
| C | -3.94415400 | -0.02186700 | -1.95906400 |
| C | -5.19358400 | -0.61054800 | -2.11270900 |
| C | -5.42453400 | -1.89515600 | -1.62245600 |
| H | -4.58178600 | -3.57448200 | -0.57081400 |
| H | -2.37415200 | -2.52481500 | -0.27104800 |
| H | -3.76634700 | 0.98953700  | -2.31766300 |
| H | -5.98985200 | -0.06155800 | -2.60557900 |
| H | -6.39882300 | -2.35775400 | -1.74389700 |
| C | -1.61085500 | -0.03051900 | -1.12771800 |
| H | -1.50412300 | 0.92227900  | -1.64506700 |
| C | -0.40510400 | -0.75550900 | -0.92216100 |
| C | 0.78322200  | -0.03789400 | -0.87316300 |
| O | 0.92366800  | 1.21345100  | -0.92678000 |
| H | -0.41093800 | -1.83138600 | -0.80788300 |
| C | -2.66182900 | 0.32586300  | 1.52934900  |
| C | -1.91388600 | 1.21393200  | 0.68603300  |
| C | -2.90014200 | 2.13025700  | 0.13623100  |
| N | -4.11958800 | 1.62958000  | 0.60727200  |
| H | -0.86516700 | 1.46945300  | 0.77700600  |
| N | -3.94351400 | 0.53051600  | 1.44226500  |
| C | -5.42457000 | 1.96736700  | 0.22001300  |
| C | -5.69498400 | 3.13315300  | -0.51096900 |
| C | -6.48346900 | 1.11184300  | 0.56419700  |
| C | -7.00478700 | 3.42173600  | -0.88746700 |
| H | -4.87858100 | 3.78721700  | -0.78131400 |
| C | -7.78252300 | 1.42281700  | 0.18442400  |
| H | -6.26739500 | 0.20618300  | 1.11513600  |
| C | -8.05748600 | 2.57817200  | -0.54626800 |
| H | -7.19786800 | 4.32750700  | -1.45469600 |
| H | -8.58769400 | 0.74758700  | 0.45841600  |
| H | -9.07381600 | 2.81447600  | -0.84348000 |
| N | -2.77606200 | 3.12553000  | -0.68372600 |

|   |             |             |             |
|---|-------------|-------------|-------------|
| H | -1.77778900 | 3.25228800  | -0.85615000 |
| C | -2.10017800 | -0.79780300 | 2.32990600  |
| H | -1.46588700 | -0.42916300 | 3.14317900  |
| H | -2.90147400 | -1.40884800 | 2.74958400  |
| H | -1.47121700 | -1.42398000 | 1.68637000  |

**TS4SS**

|   |             |             |             |
|---|-------------|-------------|-------------|
| C | -1.83320200 | 0.88478300  | -0.80601100 |
| C | -3.69019700 | 2.03258900  | -0.93931200 |
| C | -3.90772300 | -0.30298800 | -1.72159900 |
| H | -3.22507200 | -0.98074100 | -2.23221200 |
| N | -2.84298100 | 2.84220400  | -0.37582200 |
| N | -1.69300300 | 2.10881300  | -0.29047100 |
| N | -3.11389600 | 0.82393500  | -1.21680100 |
| C | -5.09592400 | 2.24075400  | -1.39918400 |
| H | -5.30441400 | 3.30353000  | -1.51528000 |
| H | -5.80812900 | 1.81207900  | -0.68085100 |
| C | -5.06120700 | 0.21596100  | -2.65999700 |
| O | -5.18917600 | 1.62885200  | -2.67134100 |
| C | -5.99729300 | -1.05878300 | -0.81432500 |
| C | -4.62725400 | -0.97599400 | -0.57404700 |
| C | -4.06047400 | -1.43706800 | 0.60540700  |
| C | -4.93236900 | -1.97423100 | 1.54173900  |
| C | -6.30658300 | -2.07975900 | 1.33584000  |
| C | -6.84543500 | -1.61899000 | 0.14065200  |
| C | -6.34677500 | -0.48906700 | -2.16274700 |
| H | -2.99028000 | -1.39863200 | 0.77576400  |
| H | -6.92955800 | -2.51067800 | 2.10928000  |
| H | -7.91331800 | -1.68626400 | -0.03632300 |
| H | -7.17871600 | 0.22047000  | -2.12735900 |
| H | -6.63369300 | -1.28797500 | -2.85314300 |
| C | -0.56740400 | 2.61842500  | 0.44573400  |
| C | -0.38871200 | 2.16033600  | 1.75171000  |
| C | 0.28727700  | 3.52616000  | -0.18320100 |
| C | 0.72460100  | 2.63854300  | 2.44201300  |
| C | 1.39383100  | 3.95730300  | 0.54355400  |
| C | 1.63246200  | 3.51515300  | 1.84871200  |
| H | 0.90585000  | 2.28512000  | 3.45330600  |
| H | 2.09378800  | 4.64521700  | 0.07598300  |
| C | 0.02970500  | 3.97529200  | -1.59676600 |
| H | -0.93686000 | 4.48067900  | -1.67795100 |
| H | 0.01048200  | 3.12122300  | -2.28277900 |
| H | 0.80949400  | 4.66143500  | -1.92882600 |
| C | -1.31977500 | 1.14656500  | 2.36511000  |

|   |             |             |             |
|---|-------------|-------------|-------------|
| H | -1.12536500 | 0.14369800  | 1.96356100  |
| H | -2.36879200 | 1.38593700  | 2.16554200  |
| H | -1.17706400 | 1.10128000  | 3.44535600  |
| H | -4.83598300 | -0.04164400 | -3.69409800 |
| C | 2.85318100  | 3.98095800  | 2.59632800  |
| H | 3.02258500  | 3.37481600  | 3.48796000  |
| H | 3.74137600  | 3.91664900  | 1.96252000  |
| H | 2.74477100  | 5.02452400  | 2.90777500  |
| N | -4.37538700 | -2.44448600 | 2.81635300  |
| O | -5.13087300 | -2.98860000 | 3.60267200  |
| O | -3.18849200 | -2.25842200 | 3.02060900  |
| C | 4.72389300  | 0.79772900  | -1.90913600 |
| C | 3.39791300  | 0.57174600  | -1.56179300 |
| C | 2.78468600  | -0.65796900 | -1.85908800 |
| C | 3.54186400  | -1.64840700 | -2.50251100 |
| C | 4.86739200  | -1.41581200 | -2.85369900 |
| C | 5.46181500  | -0.19136300 | -2.55884700 |
| H | 5.19041000  | 1.74541800  | -1.65907700 |
| H | 2.84797700  | 1.33495000  | -1.01999600 |
| H | 3.07796200  | -2.60548300 | -2.72707600 |
| H | 5.43801600  | -2.19338600 | -3.35159400 |
| H | 6.49938500  | -0.01164800 | -2.82186100 |
| C | 1.40271900  | -0.94831000 | -1.46625400 |
| H | 0.96941600  | -1.85606700 | -1.88169300 |
| C | 0.47367600  | 0.08855700  | -1.16862700 |
| C | -0.85322700 | -0.25051300 | -0.94084900 |
| O | -1.36243300 | -1.40115100 | -0.88352800 |
| H | 0.78740200  | 1.12218700  | -1.12627200 |
| C | 2.41750400  | -3.15941000 | 0.13760300  |
| C | 1.64789400  | -1.99426200 | 0.47091800  |
| C | 2.60580600  | -1.06269900 | 1.04358900  |
| N | 3.84237000  | -1.69579200 | 0.84643000  |
| H | 0.58700900  | -1.98733500 | 0.68883000  |
| N | 3.69345500  | -2.96418400 | 0.30559800  |
| C | 5.13611000  | -1.16020900 | 0.93542300  |
| C | 5.36904000  | 0.11391200  | 1.47362600  |
| C | 6.22202000  | -1.91410100 | 0.46300900  |
| C | 6.66639200  | 0.61839000  | 1.51185800  |
| H | 4.53130900  | 0.69225400  | 1.83609200  |
| C | 7.50816000  | -1.39364700 | 0.51687800  |
| H | 6.03701000  | -2.89344300 | 0.04256700  |
| C | 7.74475900  | -0.12117500 | 1.03582700  |
| H | 6.82927100  | 1.60968900  | 1.92539600  |
| H | 8.33436600  | -1.99057300 | 0.14185000  |

|   |            |             |             |
|---|------------|-------------|-------------|
| H | 8.75153400 | 0.28186000  | 1.07202800  |
| N | 2.45723600 | 0.11735500  | 1.55051600  |
| H | 1.46077300 | 0.33552600  | 1.53514200  |
| C | 1.89817400 | -4.43872200 | -0.43028800 |
| H | 1.35632200 | -4.25372700 | -1.36437900 |
| H | 2.72398500 | -5.12296900 | -0.63102400 |
| H | 1.19738300 | -4.91778700 | 0.25931100  |

**TS4SS'**

|   |             |             |             |
|---|-------------|-------------|-------------|
| C | -1.92739400 | 0.57232300  | -0.82478800 |
| C | -4.05152500 | 0.50776000  | -1.33390500 |
| C | -3.05170900 | -1.69933200 | -0.81478500 |
| H | -2.07795500 | -2.14225600 | -1.03596600 |
| N | -3.76023200 | 1.77469900  | -1.28067300 |
| N | -2.43394700 | 1.79320600  | -0.94864300 |
| N | -2.94962800 | -0.26184300 | -1.07405600 |
| C | -5.31899900 | -0.21446200 | -1.66231600 |
| H | -5.95967000 | 0.40260400  | -2.29126900 |
| H | -5.86335100 | -0.47039000 | -0.74255600 |
| C | -4.20022800 | -2.32997100 | -1.68506500 |
| O | -4.95206100 | -1.36332100 | -2.40160800 |
| C | -4.61773700 | -2.73327200 | 0.67738800  |
| C | -3.48387900 | -1.92547900 | 0.61647500  |
| C | -2.89714400 | -1.38867600 | 1.75505500  |
| C | -3.49990200 | -1.70981000 | 2.96372700  |
| C | -4.62397400 | -2.52608000 | 3.06738300  |
| C | -5.19152300 | -3.04376900 | 1.90927500  |
| C | -5.06158400 | -3.15494300 | -0.69782100 |
| H | -2.01928200 | -0.74495300 | 1.72426500  |
| H | -5.04202800 | -2.73234500 | 4.04467900  |
| H | -6.07529700 | -3.66986500 | 1.96761200  |
| H | -6.12530100 | -2.97194600 | -0.87711100 |
| H | -4.88977300 | -4.22503500 | -0.84748900 |
| C | -1.72902700 | 3.03294500  | -0.75702700 |
| C | -1.75893900 | 3.60694100  | 0.51465900  |
| C | -1.04835300 | 3.58175200  | -1.84359400 |
| C | -1.06508100 | 4.80387000  | 0.67976300  |
| C | -0.37800600 | 4.78387800  | -1.62747800 |
| C | -0.37163100 | 5.40163600  | -0.37512300 |
| H | -1.06157800 | 5.27719300  | 1.65811500  |
| H | 0.16396800  | 5.24006400  | -2.45224500 |
| C | -1.00032000 | 2.86671100  | -3.16666900 |
| H | -2.00246300 | 2.61098000  | -3.52333100 |
| H | -0.43194100 | 1.93308700  | -3.07039300 |

|   |             |             |             |
|---|-------------|-------------|-------------|
| H | -0.51139200 | 3.48500900  | -3.92068800 |
| C | -2.48082600 | 2.93273200  | 1.64874100  |
| H | -2.00155800 | 1.97088000  | 1.86128500  |
| H | -3.52961000 | 2.74628500  | 1.39750500  |
| H | -2.44603800 | 3.54978500  | 2.54745800  |
| H | -3.76812500 | -2.96071900 | -2.46092700 |
| C | 0.40588800  | 6.67297600  | -0.15642400 |
| H | 1.44783400  | 6.44238300  | 0.08886200  |
| H | 0.40791000  | 7.29490500  | -1.05431900 |
| H | -0.00883600 | 7.25374100  | 0.67003700  |
| N | -2.92937300 | -1.14578900 | 4.19483300  |
| O | -3.40637400 | -1.50239800 | 5.25811300  |
| O | -2.01513100 | -0.34922900 | 4.08260700  |
| C | 2.19024600  | -3.89425800 | -3.27519500 |
| C | 1.69925500  | -2.71057200 | -2.74155100 |
| C | 1.96354100  | -2.36157600 | -1.40604600 |
| C | 2.75034700  | -3.22550700 | -0.63469200 |
| C | 3.22700000  | -4.42294200 | -1.16487300 |
| C | 2.94936200  | -4.76123700 | -2.48433000 |
| H | 1.98061800  | -4.14604500 | -4.31006100 |
| H | 1.11795300  | -2.04221500 | -3.37041900 |
| H | 2.98487700  | -2.95385300 | 0.39066600  |
| H | 3.82851500  | -5.08170900 | -0.54705000 |
| H | 3.32740400  | -5.68883600 | -2.90176800 |
| C | 1.46236400  | -1.11344100 | -0.81222600 |
| H | 1.69422800  | -0.97474200 | 0.24293900  |
| C | 0.20715900  | -0.56195200 | -1.21546200 |
| C | -0.54080100 | 0.20308300  | -0.33206200 |
| O | -0.28361200 | 0.59860900  | 0.83030400  |
| H | -0.21456200 | -0.78729900 | -2.18995100 |
| C | 2.98653100  | 1.41173300  | -0.67276100 |
| C | 3.09261300  | 0.23554100  | -1.50674000 |
| C | 4.31031900  | -0.42640600 | -1.04514100 |
| N | 4.66258000  | 0.28691900  | 0.11162000  |
| H | 2.78857800  | 0.20167400  | -2.54567200 |
| N | 3.87065800  | 1.41444500  | 0.27938600  |
| C | 5.69344100  | 0.05826700  | 1.03631400  |
| C | 6.58706800  | -1.01566000 | 0.90805200  |
| C | 5.82459500  | 0.93046300  | 2.12951700  |
| C | 7.58745100  | -1.19563500 | 1.86101800  |
| H | 6.48896700  | -1.68796400 | 0.06809200  |
| C | 6.83077100  | 0.73265900  | 3.06524000  |
| H | 5.12993300  | 1.75307100  | 2.22991800  |
| C | 7.72337000  | -0.33070300 | 2.94226100  |

|   |            |             |             |
|---|------------|-------------|-------------|
| H | 8.27217600 | -2.03095900 | 1.74653000  |
| H | 6.91338200 | 1.41985100  | 3.90201800  |
| H | 8.50758800 | -0.48134100 | 3.67662200  |
| N | 4.96052500 | -1.44730600 | -1.49297700 |
| H | 4.47488000 | -1.78976500 | -2.32276200 |
| C | 1.98849100 | 2.51517200  | -0.79685000 |
| H | 2.31924600 | 3.38585300  | -0.22632100 |
| H | 1.85771100 | 2.80625800  | -1.84326200 |
| H | 1.01566400 | 2.20320100  | -0.40513600 |

**TS4SS"**

|   |             |             |             |
|---|-------------|-------------|-------------|
| C | 1.79311700  | -4.50048000 | -2.60430500 |
| C | 1.39973200  | -6.63610500 | -2.81724000 |
| C | -0.63707300 | -5.25875500 | -2.55467400 |
| H | -0.85421200 | -4.32565800 | -2.02955300 |
| N | 2.68781700  | -6.51735800 | -2.95399900 |
| N | 2.91567700  | -5.17338000 | -2.82079500 |
| N | 0.81508000  | -5.41748000 | -2.60719000 |
| C | 0.50134400  | -7.82781400 | -2.73374300 |
| H | 1.07513100  | -8.72351500 | -2.49951400 |
| H | -0.03383300 | -7.97959300 | -3.68063900 |
| C | -1.28522100 | -6.49795600 | -1.83144700 |
| O | -0.37880100 | -7.57619900 | -1.65247900 |
| C | -2.26159900 | -6.21586100 | -4.03299200 |
| C | -1.22238400 | -5.29015400 | -3.95053700 |
| C | -0.80430600 | -4.55369800 | -5.05039300 |
| C | -1.47863400 | -4.79207100 | -6.24073300 |
| C | -2.53067600 | -5.69710300 | -6.35876800 |
| C | -2.92827500 | -6.41869600 | -5.23971200 |
| C | -2.49895000 | -6.88488800 | -2.70586800 |
| H | -0.00579900 | -3.81943000 | -4.98739300 |
| H | -3.01112300 | -5.83133800 | -7.31974800 |
| H | -3.73636400 | -7.13826200 | -5.31418300 |
| H | -2.58239300 | -7.97290300 | -2.77951500 |
| H | -3.42476300 | -6.51628700 | -2.25313900 |
| C | 4.20083100  | -4.62623000 | -3.17641000 |
| C | 4.34223000  | -4.18344100 | -4.49352400 |
| C | 5.22928700  | -4.62524600 | -2.23761200 |
| C | 5.60430900  | -3.73428200 | -4.87132400 |
| C | 6.46581000  | -4.14514700 | -2.66379000 |
| C | 6.66712900  | -3.69393400 | -3.96950200 |
| H | 5.75182700  | -3.39054700 | -5.89181900 |
| H | 7.29298900  | -4.12700600 | -1.95783800 |
| C | 5.01228100  | -5.09436400 | -0.82407000 |

|   |             |             |             |
|---|-------------|-------------|-------------|
| H | 4.40346100  | -6.00130300 | -0.78558100 |
| H | 4.50268800  | -4.32144300 | -0.23710200 |
| H | 5.96812800  | -5.29899000 | -0.33908600 |
| C | 3.17270000  | -4.16451800 | -5.44172900 |
| H | 2.47750900  | -3.35985800 | -5.16614300 |
| H | 2.62627100  | -5.11444100 | -5.43314600 |
| H | 3.50601900  | -3.96479800 | -6.46074900 |
| H | -1.58315100 | -6.22578300 | -0.81958800 |
| C | 8.00271500  | -3.13867100 | -4.38838700 |
| H | 8.04792800  | -2.06585100 | -4.17245600 |
| H | 8.82168700  | -3.61968000 | -3.84873000 |
| H | 8.16731600  | -3.26842100 | -5.46033400 |
| N | -1.04697800 | -4.06534200 | -7.44135000 |
| O | -1.73293900 | -4.16330800 | -8.44423600 |
| O | -0.02208900 | -3.41084500 | -7.36943500 |
| C | 2.26929700  | -0.97415800 | 3.00288700  |
| C | 2.24189600  | -1.48784900 | 1.71091600  |
| C | 1.58263200  | -0.79857200 | 0.68220600  |
| C | 0.93862100  | 0.40921800  | 0.99415100  |
| C | 0.96420300  | 0.92094400  | 2.28471000  |
| C | 1.63313700  | 0.23103500  | 3.29589800  |
| H | 2.78754000  | -1.51796500 | 3.78628400  |
| H | 2.73739200  | -2.43209000 | 1.50490500  |
| H | 0.42660300  | 0.94895700  | 0.20113300  |
| H | 0.46274700  | 1.85812400  | 2.50393000  |
| H | 1.65624900  | 0.62834700  | 4.30534100  |
| C | 1.51911900  | -1.28940000 | -0.69802700 |
| H | 0.88885800  | -0.72328900 | -1.38185000 |
| C | 1.93046900  | -2.53210100 | -1.12027100 |
| C | 1.52973700  | -3.01969900 | -2.39279900 |
| O | 0.84347700  | -2.48083100 | -3.26501600 |
| H | 2.50581300  | -3.19990500 | -0.48759300 |
| C | 4.29902500  | -0.64623500 | -1.67475300 |
| C | 3.33839200  | 0.36498100  | -1.47883800 |
| C | 2.62034500  | 0.48689300  | -2.71941900 |
| N | 3.18198100  | -0.52784300 | -3.50750300 |
| H | 3.24746800  | 1.03717600  | -0.63817200 |
| N | 4.20375800  | -1.20385700 | -2.86579200 |
| C | 3.03672800  | -0.69212000 | -4.89318000 |
| C | 1.77802500  | -0.60604500 | -5.49843300 |
| C | 4.16686900  | -0.95468700 | -5.67467800 |
| C | 1.66107300  | -0.80260500 | -6.87057900 |
| H | 0.91872500  | -0.40031500 | -4.87473700 |
| C | 4.03469000  | -1.15640700 | -7.04478200 |

|   |            |             |             |
|---|------------|-------------|-------------|
| H | 5.13293400 | -1.00951600 | -5.18596800 |
| C | 2.78179300 | -1.08601200 | -7.65085200 |
| H | 0.67954800 | -0.75908100 | -7.33208200 |
| H | 4.91842800 | -1.36588700 | -7.64178700 |
| H | 2.67767000 | -1.24797000 | -8.71899000 |
| N | 1.65622900 | 1.26212600  | -3.13533900 |
| H | 1.47004400 | 1.93339800  | -2.38936400 |
| C | 5.24444600 | -1.19903400 | -0.65780200 |
| H | 5.90143500 | -1.93925900 | -1.12087900 |
| H | 5.85263600 | -0.40931800 | -0.20699300 |
| H | 4.68940500 | -1.68254000 | 0.15594700  |

**TS4SS'''**

|   |             |             |             |
|---|-------------|-------------|-------------|
| C | 0.93376600  | -1.77401400 | -0.12986500 |
| C | 2.74244200  | -2.30237300 | 0.99356300  |
| C | 3.23529500  | -1.52708600 | -1.26404400 |
| H | 2.68697100  | -1.45397200 | -2.20366900 |
| N | 1.77373800  | -2.44193800 | 1.84888900  |
| N | 0.65719000  | -2.10125600 | 1.14175200  |
| N | 2.27462100  | -1.88864300 | -0.22212800 |
| C | 4.19563200  | -2.64379000 | 1.08093200  |
| H | 4.36582400  | -3.33348900 | 1.90739200  |
| H | 4.80584400  | -1.74511200 | 1.23340000  |
| C | 4.37027700  | -2.59970400 | -1.33450500 |
| O | 4.52309600  | -3.32493200 | -0.11895200 |
| C | 5.34305700  | -0.40710800 | -1.15703300 |
| C | 3.97773400  | -0.25271500 | -0.90419700 |
| C | 3.46310400  | 0.91009400  | -0.34847700 |
| C | 4.38491500  | 1.91660500  | -0.07709200 |
| C | 5.74598600  | 1.81091800  | -0.34526900 |
| C | 6.23354400  | 0.62880300  | -0.89188700 |
| C | 5.63148000  | -1.78741200 | -1.68703700 |
| H | 2.40291300  | 1.05755400  | -0.14473100 |
| H | 6.40149300  | 2.63837100  | -0.10439000 |
| H | 7.29483100  | 0.51233900  | -1.08301000 |
| H | 6.52140900  | -2.24616200 | -1.24955300 |
| H | 5.76871400  | -1.75923100 | -2.77358100 |
| C | -0.61799300 | -2.05854400 | 1.80762300  |
| C | -1.00586700 | -0.83924300 | 2.36764000  |
| C | -1.42672900 | -3.19373000 | 1.78010100  |
| C | -2.29004700 | -0.77148400 | 2.90489300  |
| C | -2.69819400 | -3.07652000 | 2.33894700  |
| C | -3.14966900 | -1.87315100 | 2.88634400  |
| H | -2.63129200 | 0.17267300  | 3.32355400  |

|   |             |             |             |
|---|-------------|-------------|-------------|
| H | -3.35863400 | -3.93957300 | 2.32666700  |
| C | -0.95888100 | -4.45849200 | 1.11398100  |
| H | 0.03005800  | -4.75656100 | 1.47314000  |
| H | -0.89008600 | -4.31202800 | 0.03016200  |
| H | -1.65861500 | -5.27384300 | 1.30153700  |
| C | -0.10084200 | 0.35854900  | 2.30514600  |
| H | 0.09352400  | 0.63970100  | 1.26084700  |
| H | 0.86296300  | 0.15218200  | 2.78295200  |
| H | -0.56188700 | 1.21674900  | 2.79844600  |
| H | 4.14351000  | -3.35795700 | -2.08447200 |
| C | -4.55847600 | -1.75273200 | 3.40435700  |
| H | -4.63495600 | -0.98171500 | 4.17383500  |
| H | -5.23426400 | -1.47800000 | 2.58719000  |
| H | -4.91099700 | -2.69890100 | 3.82072900  |
| N | 3.90180800  | 3.14787600  | 0.55831800  |
| O | 4.65627500  | 4.10378300  | 0.60150600  |
| O | 2.77319600  | 3.14173900  | 1.01979300  |
| C | -5.35793700 | 0.09975700  | -0.18666200 |
| C | -4.01409400 | -0.07301400 | -0.49784000 |
| C | -3.63180200 | -0.66384000 | -1.71213500 |
| C | -4.63265700 | -1.06357700 | -2.60582200 |
| C | -5.97829300 | -0.89653400 | -2.29179900 |
| C | -6.34536300 | -0.31333000 | -1.08083000 |
| H | -5.63559700 | 0.56999000  | 0.75246900  |
| H | -3.25261100 | 0.27207700  | 0.19802700  |
| H | -4.34792400 | -1.51936700 | -3.55112600 |
| H | -6.74012500 | -1.22225000 | -2.99298300 |
| H | -7.39406500 | -0.17651800 | -0.83726400 |
| C | -2.21125400 | -0.87612500 | -2.04102600 |
| H | -1.98899000 | -1.23045200 | -3.04366500 |
| C | -1.31731700 | -1.20067600 | -1.02442800 |
| C | 0.02581300  | -1.48757200 | -1.30654300 |
| O | 0.56423400  | -1.56144600 | -2.43459000 |
| H | -1.63576100 | -1.08314900 | -0.00122200 |
| C | -2.72863100 | 1.94483300  | -2.75645500 |
| C | -1.51571500 | 1.18904800  | -2.80413500 |
| C | -0.78162100 | 1.58341800  | -1.63155900 |
| N | -1.68956600 | 2.36884700  | -0.92200100 |
| H | -1.04302100 | 0.79090900  | -3.69114000 |
| N | -2.85680100 | 2.58751400  | -1.62320700 |
| C | -1.54881000 | 2.90568700  | 0.36992600  |
| C | -0.30952100 | 3.37711800  | 0.81312300  |
| C | -2.66650200 | 2.97850500  | 1.20800400  |
| C | -0.19253200 | 3.90134700  | 2.09611200  |

|   |             |            |             |
|---|-------------|------------|-------------|
| H | 0.55233800  | 3.30554200 | 0.16283600  |
| C | -2.53640200 | 3.51174400 | 2.48739700  |
| H | -3.62317700 | 2.62436600 | 0.83815900  |
| C | -1.30026500 | 3.97216800 | 2.94012900  |
| H | 0.77782200  | 4.25719900 | 2.42843000  |
| H | -3.40796100 | 3.56619500 | 3.13277600  |
| H | -1.20300300 | 4.38542800 | 3.93881000  |
| N | 0.39374200  | 1.23997100 | -1.18073600 |
| H | 0.82900200  | 0.67075200 | -1.90740100 |
| C | -3.79405100 | 2.01038000 | -3.80175500 |
| H | -3.49959300 | 2.67707100 | -4.61875400 |
| H | -3.97559000 | 1.02078400 | -4.22871500 |
| H | -4.72441500 | 2.38045400 | -3.36628400 |

#### M4RR

|   |             |             |             |
|---|-------------|-------------|-------------|
| C | 1.54271100  | 0.54571700  | -0.58476100 |
| C | 3.20069100  | 1.54020600  | -1.61868700 |
| C | 3.44020900  | 1.51577300  | 0.84483900  |
| H | 2.70432300  | 1.60433600  | 1.64159200  |
| N | 2.42841600  | 1.11696100  | -2.57372500 |
| N | 1.40619200  | 0.49108500  | -1.91698600 |
| N | 2.69713700  | 1.21829700  | -0.38883700 |
| C | 4.43337900  | 2.37993800  | -1.66487100 |
| H | 4.50640400  | 2.89427600  | -2.62258500 |
| H | 5.33194600  | 1.76385700  | -1.52007400 |
| C | 4.30909700  | 2.81935000  | 0.66742200  |
| O | 4.28717100  | 3.35114800  | -0.64717100 |
| C | 5.73462200  | 0.93902900  | 1.25872300  |
| C | 4.44620300  | 0.42405100  | 1.12913300  |
| C | 4.18462800  | -0.93414800 | 1.24690000  |
| C | 5.27899800  | -1.75590700 | 1.47744500  |
| C | 6.58228900  | -1.27865600 | 1.60648300  |
| C | 6.81219000  | 0.08715800  | 1.50057500  |
| C | 5.73969700  | 2.43685200  | 1.12102000  |
| H | 3.17133700  | -1.31813400 | 1.19140400  |
| H | 7.38932500  | -1.97752900 | 1.78631500  |
| H | 7.81851300  | 0.47963800  | 1.60026400  |
| H | 6.47648400  | 2.79854500  | 0.39694300  |
| H | 5.97494400  | 2.90892600  | 2.07961200  |
| C | 0.37148600  | -0.16071400 | -2.67338200 |
| C | 0.44510500  | -1.54522200 | -2.82760600 |
| C | -0.68035700 | 0.61650000  | -3.16185700 |
| C | -0.60678100 | -2.16555700 | -3.50002600 |
| C | -1.70618500 | -0.05099600 | -3.82718500 |

|   |             |             |             |
|---|-------------|-------------|-------------|
| C | -1.69149200 | -1.43839700 | -3.99263400 |
| H | -0.58255700 | -3.24432100 | -3.63037300 |
| H | -2.54510800 | 0.52464400  | -4.21053700 |
| C | -0.74010800 | 2.09702200  | -2.89869500 |
| H | 0.21493100  | 2.58448800  | -3.11014700 |
| H | -0.98692700 | 2.28321300  | -1.84627200 |
| H | -1.51372900 | 2.56406000  | -3.50983000 |
| C | 1.58483400  | -2.33104700 | -2.23810900 |
| H | 1.48299800  | -2.38628900 | -1.14777200 |
| H | 2.54977500  | -1.86609200 | -2.46040200 |
| H | 1.59220100  | -3.34943200 | -2.62865800 |
| H | 3.89413200  | 3.61451500  | 1.28594500  |
| C | -2.84965000 | -2.13748200 | -4.65471300 |
| H | -2.54875900 | -3.10386000 | -5.06439600 |
| H | -3.64579400 | -2.31651000 | -3.92439200 |
| H | -3.26966400 | -1.53143300 | -5.46070000 |
| N | 5.05042200  | -3.20144900 | 1.59509100  |
| O | 6.00710800  | -3.91182800 | 1.85350600  |
| O | 3.91689800  | -3.61473800 | 1.42499900  |
| C | -4.74100000 | -1.20249000 | -0.75537700 |
| C | -3.56744800 | -0.66408200 | -0.23593400 |
| C | -2.81320000 | -1.37010000 | 0.71029100  |
| C | -3.26234200 | -2.62976000 | 1.11209000  |
| C | -4.43658900 | -3.17243500 | 0.59330400  |
| C | -5.18065700 | -2.45917600 | -0.34183600 |
| H | -5.31312400 | -0.63827800 | -1.48564200 |
| H | -3.23530400 | 0.31753500  | -0.56621800 |
| H | -2.67708900 | -3.20144700 | 1.82813400  |
| H | -4.76565800 | -4.15453800 | 0.91803100  |
| H | -6.09557100 | -2.87874400 | -0.74782700 |
| C | -1.53660400 | -0.78716900 | 1.28637800  |
| H | -1.01701600 | -1.56750300 | 1.85903000  |
| C | -0.61238500 | -0.28312400 | 0.21865200  |
| C | 0.68812800  | 0.00105400  | 0.52825700  |
| O | 1.27044500  | -0.10067900 | 1.66087000  |
| H | -1.00808600 | -0.14201900 | -0.77514700 |
| C | -2.80738000 | -0.09269800 | 3.38485900  |
| C | -1.82563500 | 0.34663800  | 2.34145000  |
| C | -2.56393100 | 1.51588600  | 1.72662400  |
| N | -3.83769200 | 1.47511900  | 2.28759300  |
| H | -0.84909000 | 0.63850400  | 2.74391000  |
| N | -3.92707700 | 0.52608600  | 3.30642700  |
| C | -4.98807400 | 2.21482700  | 1.96331400  |
| C | -4.98566500 | 3.14940800  | 0.91807100  |

|   |             |             |             |
|---|-------------|-------------|-------------|
| C | -6.16766400 | 1.99881200  | 2.69178800  |
| C | -6.15303300 | 3.84727400  | 0.61887300  |
| H | -4.07669100 | 3.32345600  | 0.36104200  |
| C | -7.31944800 | 2.70808000  | 2.37593200  |
| H | -6.16865700 | 1.27457500  | 3.49512400  |
| C | -7.32520900 | 3.63792500  | 1.33800600  |
| H | -6.13593000 | 4.56738900  | -0.19380900 |
| H | -8.22283800 | 2.52616200  | 2.95005800  |
| H | -8.22768300 | 4.18885400  | 1.09553300  |
| N | -2.16367600 | 2.36694800  | 0.86061800  |
| H | -1.19400400 | 2.13942500  | 0.63838500  |
| C | -2.56243500 | -1.15906500 | 4.39569700  |
| H | -1.71998100 | -0.88649200 | 5.03857400  |
| H | -3.45188500 | -1.30857900 | 5.00866900  |
| H | -2.30436100 | -2.10303100 | 3.90601000  |

#### M4RS

|   |             |             |             |
|---|-------------|-------------|-------------|
| C | -0.02374000 | 1.23522900  | -0.87450400 |
| C | -1.51668600 | 2.42686200  | -1.93903100 |
| C | -2.18460000 | 0.07638900  | -1.55835000 |
| H | -1.60885200 | -0.85678100 | -1.50868000 |
| N | -0.54012200 | 3.25544000  | -1.71036800 |
| N | 0.37990300  | 2.49514300  | -1.03484100 |
| N | -1.24082800 | 1.18480500  | -1.44132300 |
| C | -2.77366900 | 2.55822500  | -2.73506700 |
| H | -2.73989500 | 3.44665700  | -3.36437700 |
| H | -3.64877800 | 2.61782200  | -2.07379000 |
| C | -2.95644100 | 0.16812700  | -2.92318900 |
| O | -2.82271000 | 1.42259700  | -3.58096200 |
| C | -4.53057200 | 0.01525200  | -1.08356700 |
| C | -3.26809200 | 0.14995100  | -0.50687500 |
| C | -3.10140900 | 0.31075100  | 0.86214300  |
| C | -4.26157900 | 0.33659700  | 1.62573700  |
| C | -5.53939600 | 0.19857400  | 1.08612600  |
| C | -5.67507500 | 0.03321500  | -0.28732400 |
| C | -4.42663700 | -0.15955300 | -2.57544500 |
| H | -2.11135400 | 0.38073400  | 1.30338300  |
| H | -6.40125000 | 0.22622000  | 1.74070900  |
| H | -6.66030900 | -0.07258900 | -0.72875600 |
| H | -5.10490100 | 0.48920900  | -3.13698100 |
| H | -4.65867000 | -1.19373800 | -2.85057800 |
| C | 1.56824400  | 3.09012300  | -0.48811900 |
| C | 1.63163100  | 3.26845100  | 0.89661800  |
| C | 2.58651100  | 3.46796400  | -1.36342500 |

|   |             |             |             |
|---|-------------|-------------|-------------|
| C | 2.79123000  | 3.84884200  | 1.40555400  |
| C | 3.72368900  | 4.04665800  | -0.80239300 |
| C | 3.84440000  | 4.23821100  | 0.57494700  |
| H | 2.87195600  | 4.00396500  | 2.47841700  |
| H | 4.53565400  | 4.35104200  | -1.45777800 |
| C | 2.45395000  | 3.25767300  | -2.84831300 |
| H | 1.67988100  | 3.90621200  | -3.26859800 |
| H | 2.17206000  | 2.22509000  | -3.07890300 |
| H | 3.39759400  | 3.47525900  | -3.35026100 |
| C | 0.49350700  | 2.85638600  | 1.79426200  |
| H | 0.38782700  | 1.76672200  | 1.83939400  |
| H | -0.45740100 | 3.26291000  | 1.43364800  |
| H | 0.65883000  | 3.22491200  | 2.80753700  |
| H | -2.53938600 | -0.55186000 | -3.62766800 |
| C | 5.09912900  | 4.83119800  | 1.16089100  |
| H | 4.87810500  | 5.41046700  | 2.06021700  |
| H | 5.80070200  | 4.03903100  | 1.44177500  |
| H | 5.60261100  | 5.48166500  | 0.44250500  |
| N | -4.13440100 | 0.52402500  | 3.07653200  |
| O | -5.15325000 | 0.50216000  | 3.74661700  |
| O | -3.01842700 | 0.69729100  | 3.53284600  |
| C | 6.21877700  | -1.15869500 | -0.73219000 |
| C | 4.84370400  | -1.31353400 | -0.88506500 |
| C | 3.99672800  | -1.33862700 | 0.22724000  |
| C | 4.56047300  | -1.19344200 | 1.49736700  |
| C | 5.93596200  | -1.03955300 | 1.65524800  |
| C | 6.77053900  | -1.02465300 | 0.54029600  |
| H | 6.85995200  | -1.14376400 | -1.60799900 |
| H | 4.42563600  | -1.40811000 | -1.88453100 |
| H | 3.91225600  | -1.20537200 | 2.36980000  |
| H | 6.35566100  | -0.93266200 | 2.65065500  |
| H | 7.84273400  | -0.90823400 | 0.66156000  |
| C | 2.49627400  | -1.47787500 | 0.06493700  |
| H | 2.04147400  | -1.61536100 | 1.05329500  |
| C | 1.88162900  | -0.24292400 | -0.52639200 |
| C | 0.60924200  | 0.08109300  | -0.15612800 |
| O | -0.17227500 | -0.50030500 | 0.66990000  |
| H | 2.43241100  | 0.36002700  | -1.24154800 |
| C | 2.27440300  | -4.02204900 | 0.11011800  |
| C | 2.13490400  | -2.78940600 | -0.74731500 |
| C | 0.66019300  | -2.85550200 | -1.08415700 |
| N | 0.14481900  | -3.80541100 | -0.21976400 |
| H | 2.74180000  | -2.82839400 | -1.65629400 |
| N | 1.13854400  | -4.54329600 | 0.41097600  |

|   |             |             |             |
|---|-------------|-------------|-------------|
| C | -1.21503900 | -4.11496100 | -0.01773800 |
| C | -2.11487100 | -3.06449900 | 0.17836200  |
| C | -1.64871600 | -5.43948300 | 0.01119500  |
| C | -3.46434200 | -3.34633700 | 0.35994600  |
| H | -1.71774700 | -2.05382900 | 0.23208200  |
| C | -2.99951600 | -5.70927000 | 0.21698800  |
| H | -0.92833600 | -6.23918300 | -0.12350300 |
| C | -3.91179100 | -4.66798400 | 0.37705300  |
| H | -4.16547400 | -2.52921800 | 0.51438300  |
| H | -3.34087400 | -6.73930300 | 0.24264300  |
| H | -4.96393800 | -4.88592000 | 0.52891900  |
| N | -0.02107600 | -2.25116300 | -1.98018600 |
| H | 0.60260900  | -1.61115200 | -2.47174600 |
| C | 3.55559600  | -4.57543000 | 0.63605900  |
| H | 4.01596400  | -3.88219700 | 1.34683000  |
| H | 3.37038700  | -5.52792000 | 1.13476300  |
| H | 4.27273500  | -4.72302500 | -0.17706900 |

#### M4SR

|   |             |            |             |
|---|-------------|------------|-------------|
| C | 1.23453200  | 2.35868400 | -0.23037900 |
| C | 1.38234500  | 4.39923400 | 0.54149900  |
| C | -0.84159000 | 3.81324100 | -0.50781400 |
| H | -0.83444000 | 3.84414900 | -1.59710600 |
| N | 2.54902400  | 3.87201400 | 0.77041000  |
| N | 2.44245100  | 2.60205700 | 0.28007100  |
| N | 0.54103300  | 3.50327400 | -0.07052700 |
| C | 0.94155300  | 5.79070000 | 0.87670900  |
| H | 1.72356200  | 6.49658000 | 0.59331400  |
| H | 0.77631600  | 5.87844100 | 1.95770200  |
| C | -1.23142300 | 5.15144900 | 0.17279400  |
| O | -0.21380000 | 6.12360200 | 0.14077300  |
| C | -2.40111400 | 3.41003900 | 1.25487100  |
| C | -1.88630800 | 2.88107300 | 0.06506600  |
| C | -2.42518000 | 1.73882000 | -0.51119000 |
| C | -3.45936400 | 1.11773400 | 0.18258900  |
| C | -3.95036700 | 1.58552900 | 1.39899000  |
| C | -3.41951100 | 2.75223400 | 1.93877800  |
| C | -1.76373900 | 4.73849500 | 1.56549000  |
| H | -2.04783700 | 1.36571900 | -1.45661500 |
| H | -4.75424700 | 1.05143100 | 1.88970700  |
| H | -3.81935600 | 3.15499400 | 2.86302900  |
| H | -0.95373600 | 4.61353300 | 2.29374500  |
| H | -2.46591900 | 5.46791400 | 1.97256500  |
| C | 3.58400800  | 1.72482900 | 0.26976800  |

|   |             |             |             |
|---|-------------|-------------|-------------|
| C | 3.99290000  | 1.15722300  | 1.47506300  |
| C | 4.20891400  | 1.47185700  | -0.95544500 |
| C | 5.08599600  | 0.28966600  | 1.43312800  |
| C | 5.29323900  | 0.59851100  | -0.94268000 |
| C | 5.74393400  | -0.00045800 | 0.23842100  |
| H | 5.42089800  | -0.17632800 | 2.35622900  |
| H | 5.79964100  | 0.37792600  | -1.87917200 |
| C | 3.72060900  | 2.10983800  | -2.22912500 |
| H | 3.65372800  | 3.19711300  | -2.12047800 |
| H | 2.72533200  | 1.74526600  | -2.50600200 |
| H | 4.40499800  | 1.88998700  | -3.04959600 |
| C | 3.26767100  | 1.45630200  | 2.76006200  |
| H | 2.18462000  | 1.34312500  | 2.63880900  |
| H | 3.45228700  | 2.48495700  | 3.08383000  |
| H | 3.59584800  | 0.78029200  | 3.55059500  |
| H | -2.05481500 | 5.57505000  | -0.40655700 |
| C | 6.92240500  | -0.93886300 | 0.20718500  |
| H | 7.07123600  | -1.42106800 | 1.17543800  |
| H | 6.78016400  | -1.71664600 | -0.54843900 |
| H | 7.83980300  | -0.40009100 | -0.04852400 |
| N | -4.08684600 | -0.07376200 | -0.40474100 |
| O | -4.99337800 | -0.60449600 | 0.21162400  |
| O | -3.67305500 | -0.46043400 | -1.48492200 |
| C | 3.61010900  | -3.29618200 | 0.61530900  |
| C | 2.83115800  | -2.32085200 | 0.00480900  |
| C | 1.44881100  | -2.49214500 | -0.15482600 |
| C | 0.87015800  | -3.67527900 | 0.30862200  |
| C | 1.65115800  | -4.65664400 | 0.92125200  |
| C | 3.02038200  | -4.47196900 | 1.07945000  |
| H | 4.67806100  | -3.13414700 | 0.73373700  |
| H | 3.29490600  | -1.40284900 | -0.35191700 |
| H | -0.19662100 | -3.84888400 | 0.20453600  |
| H | 1.18011300  | -5.56683700 | 1.27919200  |
| H | 3.62300800  | -5.23540600 | 1.56112400  |
| C | 0.66648500  | -1.37609100 | -0.82742200 |
| H | 0.91015200  | -1.38917000 | -1.90236700 |
| C | 1.08212800  | -0.03109500 | -0.29472000 |
| C | 0.75087400  | 1.12581500  | -0.93326800 |
| O | 0.09989600  | 1.33360100  | -2.01345300 |
| H | 1.63442500  | 0.00348800  | 0.63679600  |
| C | -1.52408600 | -1.58276000 | 0.58422500  |
| C | -0.86808200 | -1.48441600 | -0.76420400 |
| C | -1.53292500 | -2.62931300 | -1.50310800 |
| N | -2.50081300 | -3.10779300 | -0.61981900 |

|   |             |             |             |
|---|-------------|-------------|-------------|
| H | -1.22624600 | -0.56712200 | -1.25388200 |
| N | -2.46093100 | -2.46101300 | 0.61045100  |
| C | -3.52381300 | -4.04617400 | -0.85413500 |
| C | -3.38901800 | -5.02561300 | -1.84498400 |
| C | -4.68382400 | -4.00027000 | -0.07088300 |
| C | -4.41609900 | -5.94442700 | -2.04290400 |
| H | -2.49417700 | -5.05053200 | -2.45068200 |
| C | -5.69235900 | -4.93386700 | -0.27672100 |
| H | -4.78370800 | -3.22442900 | 0.67775000  |
| C | -5.56858100 | -5.91087100 | -1.26327900 |
| H | -4.30325200 | -6.70004800 | -2.81420900 |
| H | -6.58796200 | -4.88942500 | 0.33529100  |
| H | -6.36118800 | -6.63435600 | -1.42252700 |
| N | -1.32808500 | -3.08615500 | -2.67520400 |
| H | -0.58080500 | -2.54699900 | -3.11370700 |
| C | -1.17124700 | -0.79055900 | 1.79935100  |
| H | -1.07078000 | 0.27184800  | 1.56068600  |
| H | -1.93358800 | -0.93450300 | 2.56746600  |
| H | -0.20248000 | -1.12627900 | 2.18780200  |

#### M4SS

|   |             |             |             |
|---|-------------|-------------|-------------|
| C | -1.78508100 | 0.77245300  | -0.58602100 |
| C | -3.68727800 | 1.85711300  | -0.61053600 |
| C | -3.87809900 | -0.50924600 | -1.30216000 |
| H | -3.20570900 | -1.18229000 | -1.83261000 |
| N | -2.82881400 | 2.71391300  | -0.14458000 |
| N | -1.64935200 | 2.01760800  | -0.12263400 |
| N | -3.09219500 | 0.65783000  | -0.88931300 |
| C | -5.12862200 | 2.00256000  | -0.97250300 |
| H | -5.38308300 | 3.05361100  | -1.10537200 |
| H | -5.77300900 | 1.57391700  | -0.19241700 |
| C | -5.10733200 | -0.05897200 | -2.17749300 |
| O | -5.29027000 | 1.34821200  | -2.21692900 |
| C | -5.87686400 | -1.31020800 | -0.24174800 |
| C | -4.49885700 | -1.17097100 | -0.09235000 |
| C | -3.83921300 | -1.58424700 | 1.05644300  |
| C | -4.62919600 | -2.12990900 | 2.05840300  |
| C | -6.00925700 | -2.28959700 | 1.94504500  |
| C | -6.64072900 | -1.87726600 | 0.77805600  |
| C | -6.33204600 | -0.79326000 | -1.57991100 |
| H | -2.75989900 | -1.50706500 | 1.14201000  |
| H | -6.56427700 | -2.72649600 | 2.76565800  |
| H | -7.71443200 | -1.98907100 | 0.67107100  |
| H | -7.18536500 | -0.11176200 | -1.51106900 |

|   |             |             |             |
|---|-------------|-------------|-------------|
| H | -6.63321800 | -1.62227800 | -2.22771100 |
| C | -0.49045500 | 2.59935200  | 0.49693300  |
| C | -0.14269700 | 2.15899400  | 1.77765500  |
| C | 0.20819900  | 3.58685000  | -0.19686300 |
| C | 0.97669200  | 2.74409200  | 2.36411900  |
| C | 1.32471000  | 4.13512300  | 0.43304300  |
| C | 1.72552800  | 3.72092800  | 1.70422800  |
| H | 1.28573000  | 2.41050300  | 3.35131800  |
| H | 1.89624800  | 4.90017900  | -0.08582600 |
| C | -0.22701400 | 4.02174900  | -1.57079000 |
| H | -1.21543000 | 4.48933800  | -1.53855000 |
| H | -0.29295600 | 3.16615800  | -2.25138400 |
| H | 0.48227200  | 4.73738600  | -1.98826000 |
| C | -0.91228100 | 1.06286800  | 2.46863400  |
| H | -0.71140300 | 0.08826400  | 2.00530300  |
| H | -1.99256400 | 1.23377800  | 2.41998800  |
| H | -0.62187300 | 0.99655400  | 3.51786200  |
| H | -4.93942900 | -0.33700600 | -3.21756400 |
| C | 2.96389600  | 4.28592700  | 2.34867600  |
| H | 2.79811400  | 4.48674800  | 3.40993200  |
| H | 3.78785600  | 3.56853900  | 2.27457500  |
| H | 3.27841900  | 5.21208600  | 1.86384800  |
| N | -3.97502500 | -2.55497700 | 3.30209400  |
| O | -4.65669400 | -3.11468600 | 4.14384400  |
| O | -2.78615200 | -2.31942900 | 3.42870000  |
| C | 4.56476200  | 0.79347600  | -2.60874200 |
| C | 3.44983500  | 0.41842200  | -1.86359400 |
| C | 2.63702600  | -0.64272900 | -2.28274200 |
| C | 2.96090300  | -1.29897600 | -3.47276900 |
| C | 4.07468000  | -0.92448000 | -4.22121600 |
| C | 4.88342800  | 0.12179900  | -3.78761700 |
| H | 5.18645500  | 1.61543300  | -2.26759100 |
| H | 3.20888800  | 0.95071200  | -0.94695500 |
| H | 2.32331100  | -2.10559100 | -3.82613400 |
| H | 4.30649700  | -1.44855200 | -5.14309600 |
| H | 5.75321000  | 0.41630000  | -4.36611300 |
| C | 1.43454400  | -1.09071300 | -1.47668000 |
| H | 0.88773300  | -1.84307600 | -2.06416500 |
| C | 0.46538900  | 0.01628300  | -1.16150800 |
| C | -0.78966000 | -0.33655600 | -0.75213700 |
| O | -1.26028100 | -1.50890200 | -0.55412600 |
| H | 0.74445300  | 1.05208100  | -1.31808800 |
| C | 2.75830900  | -3.02637900 | -0.43355000 |
| C | 1.84695800  | -1.86321500 | -0.17719600 |

|   |            |             |             |
|---|------------|-------------|-------------|
| C | 2.68747600 | -1.04592400 | 0.78317700  |
| N | 3.89629000 | -1.73053700 | 0.88830000  |
| H | 0.90495700 | -2.17831200 | 0.29023300  |
| N | 3.88796600 | -2.92020600 | 0.16108200  |
| C | 5.06000500 | -1.39604200 | 1.60330400  |
| C | 5.14902500 | -0.20654800 | 2.34115700  |
| C | 6.15708200 | -2.27065000 | 1.57294300  |
| C | 6.32312400 | 0.08900100  | 3.02892900  |
| H | 4.30245600 | 0.46341200  | 2.37230600  |
| C | 7.31728800 | -1.95499300 | 2.26861600  |
| H | 6.08864000 | -3.18733000 | 1.00282100  |
| C | 7.41364900 | -0.77404500 | 3.00236800  |
| H | 6.37591600 | 1.01364300  | 3.59609900  |
| H | 8.15536500 | -2.64437100 | 2.23367300  |
| H | 8.32219100 | -0.53350800 | 3.54409600  |
| N | 2.40882300 | 0.04685800  | 1.38232100  |
| H | 1.47397500 | 0.33552200  | 1.08984500  |
| C | 2.42342600 | -4.20280000 | -1.28448600 |
| H | 2.26821900 | -3.89532200 | -2.32317300 |
| H | 3.23261800 | -4.93306400 | -1.25017200 |
| H | 1.49597300 | -4.66939600 | -0.93933400 |

**re-TS4**

|   |             |             |             |
|---|-------------|-------------|-------------|
| C | -0.09121900 | -1.54597200 | -0.68586800 |
| C | 1.36948300  | -3.16080000 | -0.42247600 |
| C | 2.31816600  | -1.22161100 | -1.55492500 |
| H | 1.92631600  | -0.38662600 | -2.13687400 |
| N | 0.30289500  | -3.58803000 | 0.18049000  |
| N | -0.59651700 | -2.57061000 | 0.01483200  |
| N | 1.17389900  | -1.91961400 | -0.96369900 |
| C | 2.66348200  | -3.84353100 | -0.72851100 |
| H | 2.55090600  | -4.92144900 | -0.61496500 |
| H | 3.46333400  | -3.49328000 | -0.06417400 |
| C | 3.15990200  | -2.21212800 | -2.42871700 |
| O | 2.93866500  | -3.57724500 | -2.09244800 |
| C | 4.59957000  | -1.08542600 | -0.85277700 |
| C | 3.29181200  | -0.77031000 | -0.48707200 |
| C | 2.99332300  | -0.11152700 | 0.69619200  |
| C | 4.07990000  | 0.23454200  | 1.48816000  |
| C | 5.40166100  | -0.05510300 | 1.15724400  |
| C | 5.66532300  | -0.73323800 | -0.02688500 |
| C | 4.62327500  | -1.78800100 | -2.18532200 |
| H | 1.97045400  | 0.16136900  | 0.96329200  |

|   |             |             |             |
|---|-------------|-------------|-------------|
| H | 6.19824800  | 0.25210600  | 1.82323300  |
| H | 6.68606900  | -0.98051400 | -0.29875100 |
| H | 5.28359300  | -2.65860500 | -2.21344400 |
| H | 4.95003200  | -1.09698200 | -2.97059900 |
| C | -1.88602000 | -2.69384900 | 0.63818600  |
| C | -1.96794600 | -2.43035600 | 2.00699700  |
| C | -2.98000700 | -3.07454100 | -0.14396900 |
| C | -3.23558200 | -2.49353000 | 2.58787300  |
| C | -4.21993400 | -3.13044500 | 0.48696300  |
| C | -4.36825600 | -2.82404700 | 1.84347700  |
| H | -3.33672100 | -2.28024000 | 3.64861600  |
| H | -5.09309100 | -3.41347100 | -0.09601300 |
| C | -2.82641200 | -3.35348600 | -1.61410200 |
| H | -1.96109500 | -3.99254000 | -1.81004600 |
| H | -2.68654300 | -2.41862200 | -2.16972100 |
| H | -3.71815400 | -3.84578500 | -2.00435100 |
| C | -0.74038300 | -2.13414400 | 2.82948100  |
| H | -1.02306600 | -1.72933800 | 3.80219600  |
| H | -0.07060900 | -1.41919900 | 2.34081800  |
| H | -0.16828700 | -3.05276700 | 2.99313000  |
| H | 2.87784500  | -2.13842900 | -3.47910200 |
| C | -5.73350500 | -2.83694900 | 2.47832900  |
| H | -5.66472000 | -2.89806700 | 3.56601800  |
| H | -6.27762000 | -1.92043300 | 2.22729100  |
| H | -6.32699800 | -3.68078600 | 2.11843400  |
| N | 3.82142200  | 0.99569100  | 2.71357100  |
| O | 4.77471600  | 1.50351100  | 3.28282600  |
| O | 2.66805800  | 1.09485600  | 3.09268500  |
| C | -6.40827800 | 0.94256100  | -0.49726400 |
| C | -5.11036900 | 0.51551100  | -0.75388200 |
| C | -4.16635900 | 1.39304300  | -1.30626700 |
| C | -4.56596500 | 2.70032700  | -1.61350000 |
| C | -5.86347800 | 3.12912600  | -1.35244300 |
| C | -6.78945100 | 2.25160600  | -0.79133700 |
| H | -7.12861200 | 0.24921400  | -0.07400300 |
| H | -4.82873900 | -0.51285500 | -0.53870200 |
| H | -3.84013500 | 3.38551100  | -2.04431600 |
| H | -6.15205700 | 4.14859600  | -1.58889800 |
| H | -7.80344900 | 2.58238400  | -0.59114400 |
| C | -2.77573600 | 0.98979300  | -1.55536800 |
| H | -2.20035200 | 1.58546900  | -2.26113900 |
| C | -2.15661300 | -0.02707300 | -0.93982200 |
| C | -0.71569100 | -0.24938200 | -1.17829600 |
| O | -0.11124900 | 0.30235500  | -2.11540600 |

|   |             |             |             |
|---|-------------|-------------|-------------|
| H | -2.65952700 | -0.57904800 | -0.15489800 |
| C | -1.49307100 | 3.97192700  | 0.45391000  |
| C | -1.72151200 | 2.63136900  | 0.81464500  |
| C | -0.53018100 | 1.95344200  | 0.53728500  |
| N | 0.30385400  | 2.90824900  | 0.00054700  |
| H | -2.62495300 | 2.19463400  | 1.21522700  |
| N | -0.26895900 | 4.14385700  | -0.03149600 |
| C | 1.69999200  | 2.81054600  | -0.26740900 |
| C | 2.15007000  | 2.31199800  | -1.48599100 |
| C | 2.60269800  | 3.28674300  | 0.68442800  |
| C | 3.52029800  | 2.26710800  | -1.74252600 |
| H | 1.41707000  | 1.95791100  | -2.20245200 |
| C | 3.96790600  | 3.24899700  | 0.41755500  |
| H | 2.22241000  | 3.67949700  | 1.62211000  |
| C | 4.42790700  | 2.73176000  | -0.79419400 |
| H | 3.87849800  | 1.87152700  | -2.68893400 |
| H | 4.67359200  | 3.60799900  | 1.16065700  |
| H | 5.49372700  | 2.69236100  | -0.99643800 |
| N | -0.15935900 | 0.64865600  | 0.67567500  |
| H | -0.86011400 | 0.22760400  | 1.28756300  |
| C | -2.43919500 | 5.12891800  | 0.55221700  |
| H | -2.67164900 | 5.36166400  | 1.59582600  |
| H | -1.99573800 | 6.01402400  | 0.09181300  |
| H | -3.38483200 | 4.90658000  | 0.04847400  |

**si-TS4**

|   |             |             |             |
|---|-------------|-------------|-------------|
| C | -1.85617200 | -3.77991200 | -1.03868000 |
| C | -0.51868400 | -5.48643800 | -0.78311700 |
| C | 0.40127300  | -3.68865700 | -2.21554900 |
| H | -0.07895400 | -2.96766100 | -2.88008600 |
| N | -1.55963700 | -5.77560400 | -0.05911100 |
| N | -2.38034600 | -4.68757500 | -0.21644400 |
| N | -0.65685900 | -4.26941100 | -1.38952600 |
| C | 0.68514100  | -6.28474300 | -1.16444900 |
| H | 0.52795500  | -7.34092500 | -0.95002300 |
| H | 1.57502900  | -5.93528900 | -0.62402500 |
| C | 1.13991200  | -4.82499300 | -3.01425100 |
| O | 0.81695000  | -6.13487800 | -2.56713800 |
| C | 2.74085200  | -3.54980800 | -1.71092200 |
| C | 1.48013000  | -3.07590300 | -1.35057100 |
| C | 1.30713400  | -2.17780300 | -0.30735400 |
| C | 2.45579900  | -1.78010200 | 0.36366900  |
| C | 3.73225900  | -2.22633300 | 0.02798800  |
| C | 3.87661400  | -3.12172600 | -1.02503300 |

|   |             |             |             |
|---|-------------|-------------|-------------|
| C | 2.64666500  | -4.51029600 | -2.86646500 |
| H | 0.32919700  | -1.79376200 | -0.04024900 |
| H | 4.58549600  | -1.87532300 | 0.59429900  |
| H | 4.86075100  | -3.48721600 | -1.29760800 |
| H | 3.21386200  | -5.43207800 | -2.70940200 |
| H | 3.02846300  | -4.04495700 | -3.78061400 |
| C | -3.59178600 | -4.56900700 | 0.54942400  |
| C | -3.60752700 | -3.67091200 | 1.61815300  |
| C | -4.69312100 | -5.33868600 | 0.16733700  |
| C | -4.80076300 | -3.55987900 | 2.33146300  |
| C | -5.85854300 | -5.19130500 | 0.91411200  |
| C | -5.93022100 | -4.30626000 | 1.99370300  |
| H | -4.84674900 | -2.87074000 | 3.17035600  |
| H | -6.73446400 | -5.77391000 | 0.64109100  |
| C | -4.62204100 | -6.24117900 | -1.03430100 |
| H | -3.82536400 | -6.98263500 | -0.93112100 |
| H | -4.41507800 | -5.65506000 | -1.93805000 |
| H | -5.56895700 | -6.76257000 | -1.17891300 |
| C | -2.40275800 | -2.83569700 | 1.96498000  |
| H | -2.27071800 | -2.02092500 | 1.24300300  |
| H | -1.48534600 | -3.43238600 | 1.96735800  |
| H | -2.52218000 | -2.38793400 | 2.95224100  |
| H | 0.82032800  | -4.81007800 | -4.05589400 |
| C | -7.21800400 | -4.14059700 | 2.75696500  |
| H | -7.88242500 | -3.44501800 | 2.23458900  |
| H | -7.74544500 | -5.09251200 | 2.85116000  |
| H | -7.03703200 | -3.74168300 | 3.75693300  |
| N | 2.31382500  | -0.84779900 | 1.48901200  |
| O | 3.32982600  | -0.45324600 | 2.03483300  |
| O | 1.18695600  | -0.52296900 | 1.81990800  |
| C | -7.97259500 | -1.13081900 | -2.15588800 |
| C | -6.63297000 | -1.48229400 | -2.03642400 |
| C | -5.72297200 | -0.61029200 | -1.41983300 |
| C | -6.18248200 | 0.62901400  | -0.95572200 |
| C | -7.52380600 | 0.97769400  | -1.07256200 |
| C | -8.42347400 | 0.09673400  | -1.67082500 |
| H | -8.66386300 | -1.80911500 | -2.64639200 |
| H | -6.27854400 | -2.41771800 | -2.46150500 |
| H | -5.47716400 | 1.31886400  | -0.50025900 |
| H | -7.86674200 | 1.93919000  | -0.70409400 |
| H | -9.46848700 | 0.37158700  | -1.77207600 |
| C | -4.30060300 | -0.95011700 | -1.31001400 |
| H | -3.59228100 | -0.12893700 | -1.20693200 |
| C | -3.81377200 | -2.19380500 | -1.38121800 |

|   |             |             |             |
|---|-------------|-------------|-------------|
| C | -2.36099800 | -2.42395000 | -1.46330600 |
| O | -1.50663400 | -1.52804300 | -1.44923400 |
| H | -4.46686800 | -3.05582700 | -1.48118700 |
| C | -5.70863100 | -3.45479000 | -5.01139900 |
| C | -4.64807300 | -4.16459900 | -4.41295200 |
| C | -3.68911300 | -3.20533600 | -4.06783100 |
| N | -4.23518800 | -1.99761000 | -4.47031500 |
| H | -4.55624300 | -5.23231400 | -4.27446100 |
| N | -5.47055100 | -2.15451000 | -5.04094800 |
| C | -3.71170200 | -0.68689600 | -4.37166900 |
| C | -2.33927700 | -0.45788200 | -4.24523300 |
| C | -4.59760200 | 0.39617500  | -4.41679500 |
| C | -1.86725300 | 0.84792900  | -4.15140300 |
| H | -1.66422600 | -1.30122200 | -4.19051300 |
| C | -4.10887900 | 1.69426100  | -4.32559000 |
| H | -5.65883600 | 0.20123300  | -4.50840800 |
| C | -2.74200200 | 1.93084700  | -4.18925200 |
| H | -0.79981600 | 1.01526600  | -4.04477300 |
| H | -4.80634000 | 2.52587800  | -4.35328600 |
| H | -2.36480000 | 2.94535000  | -4.11242400 |
| N | -2.47912600 | -3.31839600 | -3.45335100 |
| H | -2.32286000 | -4.32313500 | -3.35072000 |
| C | -6.99052800 | -3.99693000 | -5.56295400 |
| H | -7.55364000 | -4.53286100 | -4.79303200 |
| H | -7.60767900 | -3.17900700 | -5.93894800 |
| H | -6.80486000 | -4.69882400 | -6.38100600 |

**re-M4**

|   |             |             |             |
|---|-------------|-------------|-------------|
| C | -2.30715600 | -3.66237200 | -1.01379400 |
| C | -0.71910500 | -5.17774900 | -1.10136800 |
| C | -0.22797500 | -3.15962700 | -2.41076400 |
| H | -0.85648600 | -2.46825500 | -2.97379100 |
| N | -1.56825300 | -5.65152100 | -0.24111500 |
| N | -2.54603500 | -4.69384100 | -0.19337600 |
| N | -1.13996100 | -3.97749000 | -1.60489500 |
| C | 0.56298100  | -5.73849300 | -1.62590400 |
| H | 0.57709800  | -6.82232800 | -1.51339000 |
| H | 1.41673700  | -5.31371500 | -1.07898800 |
| C | 0.69048200  | -4.05229500 | -3.31336200 |
| O | 0.61508400  | -5.43738500 | -3.00573300 |
| C | 2.04946100  | -2.61399200 | -1.89682700 |
| C | 0.72784900  | -2.44837000 | -1.48664800 |
| C | 0.39009700  | -1.73279600 | -0.34974200 |
| C | 1.44209700  | -1.14884600 | 0.34307000  |

|   |              |             |             |
|---|--------------|-------------|-------------|
| C | 2.77303100   | -1.26605100 | -0.04685700 |
| C | 3.08325000   | -2.01825800 | -1.17683100 |
| C | 2.11836700   | -3.47604900 | -3.13147800 |
| H | -0.64243700  | -1.58493500 | -0.03555500 |
| H | 3.54367800   | -0.77741300 | 0.53618300  |
| H | 4.11706500   | -2.13873600 | -1.48269300 |
| H | 2.84716600   | -4.28764700 | -3.04663500 |
| H | 2.39909400   | -2.87883500 | -4.00455000 |
| C | -3.62509600  | -4.85277400 | 0.74428100  |
| C | -3.46330600  | -4.31172800 | 2.02281000  |
| C | -4.74848800  | -5.58924200 | 0.35437500  |
| C | -4.53442800  | -4.44663200 | 2.90777200  |
| C | -5.78700100  | -5.69496400 | 1.27635900  |
| C | -5.70454000  | -5.11517800 | 2.54660500  |
| H | -4.44272000  | -4.02956100 | 3.90705000  |
| H | -6.67814700  | -6.25337900 | 1.00022400  |
| C | -4.81387800  | -6.24465900 | -0.99873500 |
| H | -3.98924100  | -6.95333800 | -1.12146300 |
| H | -4.73584900  | -5.50354300 | -1.80127600 |
| H | -5.75576100  | -6.78225500 | -1.11865300 |
| C | -2.16858500  | -3.66072600 | 2.44225000  |
| H | -2.20552800  | -3.39397000 | 3.49910800  |
| H | -1.95004600  | -2.75095000 | 1.87302000  |
| H | -1.33128800  | -4.34888400 | 2.28963400  |
| H | 0.36537800   | -3.99205700 | -4.35155400 |
| C | -6.86103500  | -5.21582400 | 3.50579700  |
| H | -6.53004500  | -5.09094200 | 4.53861600  |
| H | -7.60053200  | -4.43659700 | 3.29557300  |
| H | -7.36454200  | -6.18090900 | 3.41461900  |
| N | 1.11897900   | -0.33070900 | 1.51652400  |
| O | 2.00891700   | 0.34647500  | 2.00389700  |
| O | -0.02224100  | -0.37266500 | 1.94037000  |
| C | -8.60499600  | -4.45291000 | -2.58238700 |
| C | -7.33306700  | -4.02519600 | -2.22127600 |
| C | -6.52490200  | -3.32926400 | -3.13390200 |
| C | -7.03004700  | -3.08703400 | -4.41722100 |
| C | -8.30451000  | -3.51321300 | -4.77972600 |
| C | -9.09736100  | -4.19750400 | -3.86259400 |
| H | -9.21552800  | -4.99061700 | -1.86359500 |
| H | -6.96241300  | -4.24068900 | -1.22164000 |
| H | -6.41201600  | -2.55321900 | -5.13410500 |
| H | -8.67766900  | -3.31148200 | -5.77885600 |
| H | -10.09086500 | -4.53288800 | -4.14202700 |
| C | -5.17053600  | -2.85704500 | -2.80141000 |

|   |             |             |             |
|---|-------------|-------------|-------------|
| H | -4.57659000 | -2.43350800 | -3.60974600 |
| C | -4.59941400 | -2.88515600 | -1.59703400 |
| C | -3.17233600 | -2.36091400 | -1.38743400 |
| O | -2.65434400 | -1.74428000 | -2.40208400 |
| H | -5.13049500 | -3.26077200 | -0.72336100 |
| C | -5.52193200 | 1.15397600  | 0.01375400  |
| C | -5.29949900 | -0.23811100 | 0.00278500  |
| C | -3.93169600 | -0.38939400 | -0.12710700 |
| N | -3.41414100 | 0.87485300  | -0.19044000 |
| H | -6.02977600 | -1.02955300 | 0.08441900  |
| N | -4.37900100 | 1.81821600  | -0.10154800 |
| C | -2.05966000 | 1.30361300  | -0.26395000 |
| C | -1.20138700 | 0.76983700  | -1.21965200 |
| C | -1.63333600 | 2.30398900  | 0.61144100  |
| C | 0.10772300  | 1.24632600  | -1.28526400 |
| H | -1.56954400 | -0.02133300 | -1.87163000 |
| C | -0.32544300 | 2.76592300  | 0.53473700  |
| H | -2.33174300 | 2.70270500  | 1.33857000  |
| C | 0.55056200  | 2.23803200  | -0.41470600 |
| H | 0.78961800  | 0.82732000  | -2.02048600 |
| H | 0.01383700  | 3.53555000  | 1.22039500  |
| H | 1.57359400  | 2.59646600  | -0.47021800 |
| N | -3.12637500 | -1.55172300 | -0.08524500 |
| H | -3.51653300 | -2.12930500 | 0.66022900  |
| C | -6.82115600 | 1.88877500  | 0.12050000  |
| H | -7.35589800 | 1.61320900  | 1.03365300  |
| H | -6.63776200 | 2.96444800  | 0.13525200  |
| H | -7.47408600 | 1.65923300  | -0.72612500 |

**si-M4**

|   |             |             |             |
|---|-------------|-------------|-------------|
| C | -2.37652800 | -3.96931600 | -1.39735600 |
| C | -0.66070700 | -5.27513000 | -0.98578800 |
| C | -0.23117400 | -3.63784200 | -2.74887300 |
| H | -0.84644600 | -3.10475500 | -3.47642200 |
| N | -1.54040900 | -5.60378700 | -0.08890700 |
| N | -2.60010300 | -4.77406100 | -0.35433500 |
| N | -1.13250200 | -4.28655400 | -1.80261100 |
| C | 0.68822600  | -5.83409300 | -1.30890100 |
| H | 0.78890500  | -6.84006500 | -0.90252600 |
| H | 1.47995100  | -5.19880500 | -0.89028700 |
| C | 0.69176900  | -4.69743200 | -3.43586900 |
| O | 0.76813200  | -5.92577700 | -2.72028900 |
| C | 2.03517600  | -2.92518300 | -2.48873100 |

|   |             |             |             |
|---|-------------|-------------|-------------|
| C | 0.73421200  | -2.72312300 | -2.03050100 |
| C | 0.43120600  | -1.78527500 | -1.05408700 |
| C | 1.50231200  | -1.05252800 | -0.55854300 |
| C | 2.81385000  | -1.21128500 | -1.00230500 |
| C | 3.08445600  | -2.16181300 | -1.98126100 |
| C | 2.06236100  | -3.99481800 | -3.54903300 |
| H | -0.59601900 | -1.61396700 | -0.73706100 |
| H | 3.59900900  | -0.60211700 | -0.57245200 |
| H | 4.10023100  | -2.30739400 | -2.33303600 |
| H | 2.87657900  | -4.71444700 | -3.43092800 |
| H | 2.16324400  | -3.53385300 | -4.53835100 |
| C | -3.74323000 | -4.80242800 | 0.52020400  |
| C | -3.81880500 | -3.83550500 | 1.52454500  |
| C | -4.72429600 | -5.76678600 | 0.29815800  |
| C | -4.96074700 | -3.84159600 | 2.31990500  |
| C | -5.84916300 | -5.73012100 | 1.12236800  |
| C | -5.98770200 | -4.76894000 | 2.12412100  |
| H | -5.06440300 | -3.08825900 | 3.09703100  |
| H | -6.63905700 | -6.46037100 | 0.96693600  |
| C | -4.57955600 | -6.77565700 | -0.80963200 |
| H | -3.67030400 | -7.37075700 | -0.68407400 |
| H | -4.51061100 | -6.28253900 | -1.78649000 |
| H | -5.43642300 | -7.45027100 | -0.83012400 |
| C | -2.74090200 | -2.79656900 | 1.67531100  |
| H | -2.70177200 | -2.15778800 | 0.78286200  |
| H | -1.75626200 | -3.26184500 | 1.79292600  |
| H | -2.93195900 | -2.17055400 | 2.54835400  |
| H | 0.29586400  | -4.97587700 | -4.41294900 |
| C | -7.24249600 | -4.69007700 | 2.95211200  |
| H | -7.88738300 | -3.89085400 | 2.57009200  |
| H | -7.80454200 | -5.62560300 | 2.91580200  |
| H | -7.01316100 | -4.46133300 | 3.99592700  |
| N | 1.23689100  | -0.06192800 | 0.49286100  |
| O | 2.15610300  | 0.65996600  | 0.84141400  |
| O | 0.11432900  | -0.01896200 | 0.96388600  |
| C | -8.86297300 | -2.93548200 | -0.19398100 |
| C | -7.58271600 | -2.89173300 | -0.73266600 |
| C | -6.62520600 | -1.99462600 | -0.23752400 |
| C | -6.99656600 | -1.13779600 | 0.80602600  |
| C | -8.27874300 | -1.17910900 | 1.34741300  |
| C | -9.21876100 | -2.07777900 | 0.84758400  |
| H | -9.59103200 | -3.63459500 | -0.59367800 |
| H | -7.32619500 | -3.55487500 | -1.55397400 |
| H | -6.26458700 | -0.43628600 | 1.19781500  |

|   |              |             |             |
|---|--------------|-------------|-------------|
| H | -8.54451100  | -0.50715300 | 2.15752400  |
| H | -10.22084900 | -2.10981500 | 1.26329000  |
| C | -5.24743900  | -1.93921900 | -0.75406700 |
| H | -4.64148500  | -1.07621800 | -0.48072000 |
| C | -4.64517600  | -2.88273300 | -1.47575800 |
| C | -3.19584500  | -2.73392100 | -1.93244100 |
| O | -2.57717100  | -1.64848300 | -1.54926000 |
| H | -5.16656300  | -3.79675900 | -1.76612300 |
| C | -5.29714300  | -0.74260600 | -5.34211900 |
| C | -5.20557900  | -1.79746500 | -4.41073600 |
| C | -3.85320500  | -1.97849400 | -4.19307900 |
| N | -3.21687800  | -1.05060800 | -4.97321500 |
| H | -6.00965500  | -2.35355600 | -3.95235000 |
| N | -4.09200200  | -0.29916400 | -5.67760800 |
| C | -1.82609800  | -0.82960100 | -5.17309100 |
| C | -0.96914400  | -0.69001500 | -4.08373000 |
| C | -1.35635400  | -0.70026500 | -6.48092500 |
| C | 0.38198500   | -0.43377100 | -4.31953200 |
| H | -1.37908200  | -0.79460800 | -3.07905700 |
| C | -0.00824800  | -0.44072600 | -6.69963500 |
| H | -2.05460000  | -0.79821400 | -7.30465200 |
| C | 0.86501800   | -0.30981600 | -5.62011000 |
| H | 1.05795400   | -0.31164400 | -3.47750600 |
| H | 0.36124900   | -0.34079900 | -7.71505900 |
| H | 1.91592900   | -0.10134600 | -5.79336500 |
| N | -3.15132500  | -2.95546900 | -3.45337600 |
| H | -3.58112900  | -3.85712900 | -3.66150900 |
| C | -6.52508900  | -0.11872100 | -5.92706500 |
| H | -7.13927100  | 0.34576900  | -5.15069800 |
| H | -6.24019200  | 0.64849800  | -6.64904300 |
| H | -7.14277100  | -0.86463600 | -6.43483500 |

#### NTS4RR

|   |             |             |             |
|---|-------------|-------------|-------------|
| C | -1.91906200 | -0.32915700 | -0.76629900 |
| C | -3.69979700 | -0.72885100 | -1.96455000 |
| C | -2.54676300 | -2.77964300 | -1.20031900 |
| H | -1.49554400 | -3.01860600 | -1.04940800 |
| N | -3.65936500 | 0.56747200  | -1.85248700 |
| N | -2.55190700 | 0.80004700  | -1.09532200 |
| N | -2.65065200 | -1.31628400 | -1.31465800 |
| C | -4.61152900 | -1.61772600 | -2.74474800 |
| H | -5.12466600 | -1.04883500 | -3.51924800 |
| H | -5.35903400 | -2.08347300 | -2.08792600 |
| C | -3.14219200 | -3.47518800 | -2.48309300 |

|   |             |             |             |
|---|-------------|-------------|-------------|
| O | -3.78063600 | -2.57451900 | -3.37313300 |
| C | -4.29027000 | -4.26642400 | -0.49160800 |
| C | -3.40970600 | -3.27530200 | -0.06205800 |
| C | -3.39294800 | -2.83135100 | 1.25252600  |
| C | -4.30622400 | -3.41889500 | 2.11664800  |
| C | -5.19830600 | -4.41465700 | 1.72517100  |
| C | -5.18789300 | -4.84593200 | 0.40440100  |
| C | -4.10317000 | -4.56690000 | -1.95370800 |
| H | -2.69439400 | -2.07907200 | 1.60026500  |
| H | -5.88563900 | -4.82986900 | 2.45140300  |
| H | -5.87793300 | -5.61637300 | 0.07769900  |
| H | -5.04096600 | -4.55181300 | -2.51726400 |
| H | -3.66293700 | -5.55924200 | -2.08857900 |
| C | -2.21628400 | 2.14088800  | -0.69172700 |
| C | -2.47442500 | 2.51442400  | 0.62744300  |
| C | -1.59896100 | 2.97224900  | -1.62914900 |
| C | -2.06434600 | 3.79056600  | 1.01137800  |
| C | -1.20781300 | 4.23558400  | -1.19264900 |
| C | -1.41966900 | 4.65348400  | 0.12443200  |
| H | -2.24706500 | 4.11307400  | 2.03293400  |
| H | -0.71924300 | 4.90611800  | -1.89498500 |
| C | -1.33430100 | 2.49484800  | -3.03148000 |
| H | -2.26471000 | 2.24092500  | -3.54651400 |
| H | -0.70823400 | 1.59545300  | -3.02283200 |
| H | -0.81866800 | 3.26466600  | -3.60638700 |
| C | -3.12085300 | 1.57085900  | 1.60629800  |
| H | -2.38750000 | 0.85332600  | 1.99311500  |
| H | -3.93812400 | 1.00663900  | 1.14812800  |
| H | -3.52170600 | 2.12347700  | 2.45704800  |
| H | -2.33215800 | -3.90577300 | -3.07092800 |
| C | -0.92964600 | 6.00074500  | 0.58445000  |
| H | -0.97226900 | 6.73460100  | -0.22322700 |
| H | -1.51983800 | 6.37060300  | 1.42512600  |
| H | 0.11184000  | 5.92851200  | 0.91540100  |
| N | -4.33284900 | -2.96133100 | 3.51191200  |
| O | -5.08179400 | -3.53217200 | 4.28453300  |
| O | -3.60683500 | -2.03166900 | 3.81844300  |
| C | 3.00529000  | 3.75113700  | 0.99923300  |
| C | 2.17575200  | 2.68942900  | 0.65749800  |
| C | 2.18790300  | 1.50535700  | 1.41146100  |
| C | 3.04975600  | 1.41835600  | 2.51208800  |
| C | 3.88524800  | 2.47900100  | 2.84820600  |
| C | 3.86704000  | 3.64687900  | 2.09060300  |
| H | 2.98195800  | 4.66213200  | 0.40931400  |

|   |             |             |             |
|---|-------------|-------------|-------------|
| H | 1.51523400  | 2.79232100  | -0.19816900 |
| H | 3.05991400  | 0.51330400  | 3.11304400  |
| H | 4.54734300  | 2.39365000  | 3.70318500  |
| H | 4.51600100  | 4.47609700  | 2.35211600  |
| C | 1.32349700  | 0.35401300  | 1.07003000  |
| H | 1.16737300  | -0.36113500 | 1.87666700  |
| C | 0.21216200  | 0.51615100  | 0.20218100  |
| C | -0.68168500 | -0.54528200 | 0.07193100  |
| O | -0.56197700 | -1.69332600 | 0.55928200  |
| H | 0.07470000  | 1.42405700  | -0.36288800 |
| C | 3.57171200  | -1.36002300 | 1.06964500  |
| C | 2.51864500  | -1.01936800 | 0.13845000  |
| C | 3.17582700  | -0.16200300 | -0.78805100 |
| N | 4.40753200  | 0.07023300  | -0.29735000 |
| H | 1.68500400  | -1.67073000 | -0.09714600 |
| N | 4.66161600  | -0.68352000 | 0.83999500  |
| C | 5.44264000  | 0.87967300  | -0.83957500 |
| C | 6.74578100  | 0.38240700  | -0.83858500 |
| C | 5.15515900  | 2.14256700  | -1.35433800 |
| C | 7.76679500  | 1.15848300  | -1.37240900 |
| H | 6.93903100  | -0.59703900 | -0.41640100 |
| C | 6.18679500  | 2.90184700  | -1.90228800 |
| H | 4.14837400  | 2.54166500  | -1.28969100 |
| C | 7.48972100  | 2.41366600  | -1.91382000 |
| H | 8.78242600  | 0.77765300  | -1.37286000 |
| H | 5.96880000  | 3.88541300  | -2.30454300 |
| H | 8.29013800  | 3.01154900  | -2.33605200 |
| N | 2.65551500  | 0.43025300  | -1.87582700 |
| H | 3.26864400  | 0.90651000  | -2.52324100 |
| C | 3.45442700  | -2.29256700 | 2.22631500  |
| H | 3.26529500  | -3.31143300 | 1.87766200  |
| H | 4.37231800  | -2.27949100 | 2.81457100  |
| H | 2.61389400  | -2.01027600 | 2.86885000  |
| H | 1.82729700  | 0.01162500  | -2.27098000 |

#### NTS4RS

|   |             |             |             |
|---|-------------|-------------|-------------|
| C | -0.31295400 | -0.62872000 | 0.51727300  |
| C | -1.70911200 | -0.67393400 | 2.19194800  |
| C | -2.62034300 | 0.38533400  | 0.14062300  |
| H | -2.15300700 | 1.00785400  | -0.62718300 |
| N | -0.66164100 | -1.31789700 | 2.61789500  |
| N | 0.19751600  | -1.28942500 | 1.55536300  |
| N | -1.53839200 | -0.24595900 | 0.90397800  |
| C | -2.96346400 | -0.24943800 | 2.88386400  |

|   |             |             |             |
|---|-------------|-------------|-------------|
| H | -2.82224900 | -0.25434700 | 3.96410600  |
| H | -3.79564500 | -0.91919900 | 2.62700600  |
| C | -3.53450000 | 1.23315500  | 1.10369200  |
| O | -3.20371800 | 1.08358700  | 2.47427800  |
| C | -4.86580100 | -0.44481300 | -0.04259400 |
| C | -3.54403900 | -0.67372200 | -0.42124400 |
| C | -3.18457200 | -1.77324200 | -1.18917600 |
| C | -4.20862500 | -2.63603300 | -1.55297800 |
| C | -5.54186300 | -2.43447200 | -1.20222500 |
| C | -5.87443200 | -1.32229300 | -0.43851500 |
| C | -4.98702700 | 0.80159600  | 0.79053200  |
| H | -2.15880400 | -1.94018500 | -1.50170300 |
| H | -6.29135000 | -3.14699100 | -1.52308600 |
| H | -6.90522700 | -1.15004800 | -0.14797100 |
| H | -5.54524500 | 0.64205500  | 1.71816200  |
| H | -5.50630200 | 1.58810600  | 0.23473700  |
| C | 1.43377200  | -2.02509200 | 1.58265000  |
| C | 1.57439600  | -3.10613500 | 0.70292700  |
| C | 2.42452400  | -1.63126000 | 2.48324100  |
| C | 2.78939600  | -3.78497400 | 0.72954600  |
| C | 3.62197400  | -2.34665000 | 2.46429300  |
| C | 3.82274800  | -3.41804700 | 1.59523600  |
| H | 2.93080700  | -4.62820500 | 0.05831100  |
| H | 4.41556000  | -2.05537200 | 3.14744000  |
| C | 2.21297400  | -0.49880400 | 3.45172700  |
| H | 1.68516200  | -0.84894400 | 4.34402400  |
| H | 1.60390400  | 0.29738400  | 3.01683000  |
| H | 3.17098200  | -0.07944100 | 3.76430600  |
| C | 0.47056500  | -3.53715700 | -0.22972600 |
| H | 0.42101600  | -2.90562300 | -1.12302800 |
| H | -0.50770200 | -3.49854900 | 0.25979900  |
| H | 0.64143400  | -4.56307500 | -0.55893700 |
| H | -3.37941700 | 2.29309000  | 0.90647100  |
| C | 5.11590700  | -4.18990600 | 1.60168800  |
| H | 5.48276100  | -4.34677600 | 0.58421400  |
| H | 5.88695700  | -3.66801800 | 2.17132300  |
| H | 4.97109800  | -5.17621000 | 2.05307800  |
| N | -3.86317100 | -3.82623800 | -2.34091200 |
| O | -4.77411600 | -4.53368100 | -2.73406500 |
| O | -2.68308700 | -4.04473700 | -2.55316800 |
| C | 5.84714000  | 1.19314500  | -1.00481400 |
| C | 4.47256100  | 1.00307200  | -0.88225000 |
| C | 3.65922200  | 0.95812800  | -2.02052900 |
| C | 4.25644300  | 1.09974600  | -3.28023200 |

|   |             |             |             |
|---|-------------|-------------|-------------|
| C | 5.62759800  | 1.28411300  | -3.40337000 |
| C | 6.42764700  | 1.33524500  | -2.26212100 |
| H | 6.46566200  | 1.22120000  | -0.11384100 |
| H | 4.04277300  | 0.87561500  | 0.10579200  |
| H | 3.63312700  | 1.06139600  | -4.17064500 |
| H | 6.07327900  | 1.38511700  | -4.38732000 |
| H | 7.49919900  | 1.47867200  | -2.35424700 |
| C | 2.18242900  | 0.76208200  | -1.94491700 |
| H | 1.75592700  | 0.36301800  | -2.86601300 |
| C | 1.57518300  | 0.23517500  | -0.76673200 |
| C | 0.29711700  | -0.31133700 | -0.83029200 |
| O | -0.43461400 | -0.52136200 | -1.82216200 |
| H | 2.04973700  | 0.33915000  | 0.20166500  |
| C | 0.09134200  | 2.37882000  | -2.44164100 |
| C | 1.52552200  | 2.58580200  | -2.29807200 |
| C | 1.63493800  | 3.15767100  | -0.98483800 |
| N | 0.43245900  | 3.02370500  | -0.41360500 |
| H | 2.16882900  | 2.88653100  | -3.11484100 |
| N | -0.52982400 | 2.56645800  | -1.31641100 |
| C | 0.04569700  | 3.21617100  | 0.94097100  |
| C | 0.85076500  | 2.74233400  | 1.97532300  |
| C | -1.17219700 | 3.84068300  | 1.20490600  |
| C | 0.42694300  | 2.90322100  | 3.29292600  |
| H | 1.78851600  | 2.24197900  | 1.75221300  |
| C | -1.59068500 | 3.97825100  | 2.52350600  |
| H | -1.77474600 | 4.20064800  | 0.37780600  |
| C | -0.79361200 | 3.51287300  | 3.56837000  |
| H | 1.05068400  | 2.53881000  | 4.10263900  |
| H | -2.54281800 | 4.45358500  | 2.73428700  |
| H | -1.12489800 | 3.62514900  | 4.59475400  |
| N | 2.73035100  | 3.58894200  | -0.35603300 |
| H | 3.56489000  | 3.75836200  | -0.89749700 |
| C | -0.61215600 | 1.90626200  | -3.66550500 |
| H | -0.19802000 | 0.94811500  | -3.98923000 |
| H | -1.67188600 | 1.76564200  | -3.45092000 |
| H | -0.49629100 | 2.63095100  | -4.47561600 |
| H | 2.66034500  | 4.04522300  | 0.54293600  |

#### NTS4SR

|   |             |            |             |
|---|-------------|------------|-------------|
| C | 1.09863900  | 2.04788200 | -0.29094100 |
| C | 1.47417600  | 4.18729100 | -0.06994000 |
| C | -0.89941900 | 3.62032400 | -0.59677500 |
| H | -1.25919100 | 2.96836800 | -1.38981800 |
| N | 2.61926600  | 3.61931400 | 0.18058300  |

|   |             |             |             |
|---|-------------|-------------|-------------|
| N | 2.36882700  | 2.29046100  | 0.04315100  |
| N | 0.51733900  | 3.26211500  | -0.37643800 |
| C | 1.11451000  | 5.63554100  | -0.11155600 |
| H | 1.99806300  | 6.23451200  | -0.33021900 |
| H | 0.70216700  | 5.95141300  | 0.85602000  |
| C | -1.04240400 | 5.14601100  | -0.96453400 |
| O | 0.19183100  | 5.80702700  | -1.16541800 |
| C | -2.24317600 | 4.67222800  | 1.09832000  |
| C | -1.68499400 | 3.46458500  | 0.68252100  |
| C | -1.85281500 | 2.29855400  | 1.41323000  |
| C | -2.59316500 | 2.38867200  | 2.58187600  |
| C | -3.16952100 | 3.57609100  | 3.02662400  |
| C | -2.99381300 | 4.73041700  | 2.27308200  |
| C | -1.91725900 | 5.78778800  | 0.14386900  |
| H | -1.42836300 | 1.35381600  | 1.10158500  |
| H | -3.74167000 | 3.58084900  | 3.94585500  |
| H | -3.43326300 | 5.66538700  | 2.60344800  |
| H | -1.38604200 | 6.60831600  | 0.63706300  |
| H | -2.82517100 | 6.21832000  | -0.28636800 |
| C | 3.41851900  | 1.32817100  | 0.25953700  |
| C | 3.72924200  | 0.99998100  | 1.58090500  |
| C | 4.01074400  | 0.72660700  | -0.85168800 |
| C | 4.67112700  | -0.00871500 | 1.77561100  |
| C | 4.94552100  | -0.27548300 | -0.60051900 |
| C | 5.27433000  | -0.66521400 | 0.69966900  |
| H | 4.93119100  | -0.29437600 | 2.79134800  |
| H | 5.42281200  | -0.76968000 | -1.44255800 |
| C | 3.61979300  | 1.10939100  | -2.25324400 |
| H | 3.56864500  | 2.19497300  | -2.37379100 |
| H | 2.63703500  | 0.69502700  | -2.50605000 |
| H | 4.34177500  | 0.71659300  | -2.97001700 |
| C | 3.03640600  | 1.67773100  | 2.73284800  |
| H | 1.95040100  | 1.54136500  | 2.67133100  |
| H | 3.23265200  | 2.75341500  | 2.73382900  |
| H | 3.37750400  | 1.26261300  | 3.68169100  |
| H | -1.54129800 | 5.21111700  | -1.93074500 |
| C | 6.23831800  | -1.79750500 | 0.93470900  |
| H | 7.02596700  | -1.80913800 | 0.17819700  |
| H | 6.70115300  | -1.72647500 | 1.92086900  |
| H | 5.71197800  | -2.75621700 | 0.87818400  |
| N | -2.77262800 | 1.16991100  | 3.37939000  |
| O | -3.41348400 | 1.24980800  | 4.40959500  |
| O | -2.26248800 | 0.14046600  | 2.96395800  |
| C | 2.56448200  | -4.39925000 | 0.97070400  |

|   |             |             |             |
|---|-------------|-------------|-------------|
| C | 1.98575800  | -3.15115500 | 0.77199900  |
| C | 1.05284100  | -2.95920400 | -0.25697300 |
| C | 0.72075200  | -4.04221200 | -1.08125700 |
| C | 1.30176800  | -5.29021800 | -0.88279800 |
| C | 2.22237100  | -5.47138900 | 0.14645400  |
| H | 3.28637800  | -4.53664400 | 1.76899500  |
| H | 2.26798900  | -2.32494000 | 1.41878300  |
| H | 0.00673400  | -3.89905600 | -1.88961100 |
| H | 1.03911000  | -6.11844300 | -1.53320800 |
| H | 2.67715900  | -6.44381000 | 0.30379000  |
| C | 0.41214800  | -1.65643700 | -0.51400800 |
| H | -0.06139200 | -1.58307500 | -1.49061900 |
| C | 0.97826100  | -0.43526400 | -0.07188100 |
| C | 0.41207200  | 0.73466400  | -0.57129700 |
| O | -0.66143800 | 0.81991300  | -1.22538200 |
| H | 1.80385100  | -0.41637600 | 0.62324200  |
| C | -1.51628100 | -2.92040600 | 1.23623900  |
| C | -1.49912500 | -1.74884500 | 0.39174000  |
| C | -2.21729200 | -2.16791500 | -0.76518900 |
| N | -2.45666300 | -3.48523200 | -0.61494200 |
| H | -1.51429800 | -0.73142900 | 0.75023800  |
| N | -2.02254800 | -3.95327700 | 0.62308800  |
| C | -3.00257000 | -4.39380600 | -1.55842600 |
| C | -4.09210500 | -4.01712100 | -2.34342300 |
| C | -2.43932400 | -5.66498800 | -1.67267800 |
| C | -4.59610500 | -4.91547100 | -3.28092100 |
| H | -4.56357000 | -3.05015500 | -2.19894000 |
| C | -2.96484500 | -6.55660100 | -2.60066200 |
| H | -1.60746300 | -5.93457200 | -1.03146800 |
| C | -4.03456600 | -6.18220700 | -3.41319300 |
| H | -5.44345700 | -4.62651600 | -3.89312200 |
| H | -2.53186500 | -7.54686400 | -2.69363900 |
| H | -4.43531500 | -6.88084700 | -4.13945300 |
| N | -2.48343700 | -1.42603000 | -1.84691300 |
| H | -2.02029500 | -0.51868800 | -1.87440700 |
| C | -0.98659500 | -3.00705900 | 2.62535200  |
| H | -1.57378700 | -2.36784100 | 3.29034900  |
| H | -1.02446400 | -4.03741400 | 2.98011700  |
| H | 0.04901500  | -2.65530300 | 2.65620500  |
| H | -2.75726100 | -1.86075000 | -2.71625300 |

#### NTS4SS

|   |             |            |             |
|---|-------------|------------|-------------|
| C | -2.12492100 | 1.01521600 | -0.68715800 |
| C | -3.92365700 | 1.73991200 | -1.67927200 |

|   |             |             |             |
|---|-------------|-------------|-------------|
| C | -3.63845700 | -0.77729100 | -1.69200600 |
| H | -2.97193100 | -1.12232800 | -2.48409500 |
| N | -3.30415000 | 2.81248900  | -1.27334200 |
| N | -2.18703900 | 2.33709300  | -0.65569300 |
| N | -3.22716400 | 0.60694300  | -1.33612700 |
| C | -5.24705600 | 1.65462500  | -2.37697200 |
| H | -5.28873400 | 2.39317500  | -3.17845500 |
| H | -6.04621100 | 1.87949200  | -1.66009100 |
| C | -5.12463000 | -0.70871600 | -2.12462900 |
| O | -5.40993600 | 0.38375000  | -2.96511700 |
| C | -5.00912200 | -1.68781000 | 0.03055400  |
| C | -3.70767200 | -1.67508900 | -0.48349300 |
| C | -2.69483700 | -2.43111800 | 0.08266400  |
| C | -3.02031000 | -3.15872400 | 1.21879000  |
| C | -4.29962800 | -3.18268300 | 1.76735700  |
| C | -5.31114800 | -2.44681500 | 1.15786200  |
| C | -5.92171300 | -0.82624000 | -0.80451700 |
| H | -1.69028600 | -2.45443200 | -0.32254400 |
| H | -4.48960900 | -3.77600100 | 2.65315600  |
| H | -6.31783400 | -2.46987800 | 1.56017100  |
| H | -6.06325500 | 0.14768800  | -0.32078600 |
| H | -6.90961400 | -1.26312900 | -0.95849700 |
| C | -1.21673100 | 3.20972000  | -0.04609500 |
| C | -1.39064800 | 3.53913800  | 1.30109800  |
| C | -0.15343200 | 3.66528100  | -0.82731300 |
| C | -0.42547700 | 4.36121100  | 1.87796800  |
| C | 0.78302700  | 4.48942600  | -0.19953000 |
| C | 0.66259800  | 4.84389900  | 1.14619100  |
| H | -0.52610700 | 4.63243300  | 2.92551900  |
| H | 1.62301600  | 4.86368600  | -0.77951900 |
| C | 0.00156500  | 3.25096800  | -2.26663100 |
| H | -0.95129300 | 3.28750700  | -2.80050900 |
| H | 0.38383100  | 2.22536800  | -2.33043000 |
| H | 0.70964500  | 3.90412000  | -2.77814100 |
| C | -2.56534000 | 3.01151600  | 2.07843300  |
| H | -2.52794300 | 1.91816600  | 2.12159900  |
| H | -3.50728200 | 3.30128800  | 1.60260600  |
| H | -2.55790600 | 3.40425100  | 3.09563000  |
| H | -5.31663900 | -1.59734900 | -2.72993600 |
| C | 1.67141200  | 5.75210600  | 1.79732600  |
| H | 1.91517000  | 5.40722800  | 2.80487100  |
| H | 2.59246000  | 5.80601200  | 1.21417900  |
| H | 1.26861000  | 6.76573800  | 1.88544400  |
| N | -1.95513000 | -3.92459000 | 1.87535200  |

|   |             |             |             |
|---|-------------|-------------|-------------|
| O | -2.24343500 | -4.57805400 | 2.85869200  |
| O | -0.83006900 | -3.85959700 | 1.39979300  |
| C | 3.44513800  | -2.08529900 | -2.64916100 |
| C | 2.48359700  | -1.38863900 | -1.92793900 |
| C | 1.87171100  | -1.97525800 | -0.81013300 |
| C | 2.26645700  | -3.25894400 | -0.41488800 |
| C | 3.22670000  | -3.95821100 | -1.14075200 |
| C | 3.81220600  | -3.37489600 | -2.26215700 |
| H | 3.91438200  | -1.62229500 | -3.51097400 |
| H | 2.21044800  | -0.37976700 | -2.22445600 |
| H | 1.79767500  | -3.71539700 | 0.45349400  |
| H | 3.51441000  | -4.95773200 | -0.83263500 |
| H | 4.56053600  | -3.91919000 | -2.82929800 |
| C | 0.81175700  | -1.28096400 | -0.05500400 |
| H | 0.33219400  | -1.87985400 | 0.71954900  |
| C | -0.04193500 | -0.34644400 | -0.69436200 |
| C | -1.10938400 | 0.16032600  | 0.04566900  |
| O | -1.35827300 | -0.01669300 | 1.25356400  |
| H | 0.10738000  | -0.03985100 | -1.72193700 |
| C | 2.54748900  | -1.25831600 | 2.12559000  |
| C | 1.74473500  | -0.23937400 | 1.49403600  |
| C | 2.68431300  | 0.48802700  | 0.72040600  |
| N | 3.86069400  | -0.16216300 | 0.82927100  |
| H | 0.80377100  | 0.14888800  | 1.86715200  |
| N | 3.77563900  | -1.24927900 | 1.68461700  |
| C | 5.07235200  | 0.08657200  | 0.13081700  |
| C | 5.58425400  | 1.38080400  | 0.05001300  |
| C | 5.73957900  | -0.99113400 | -0.44775800 |
| C | 6.76631000  | 1.59884400  | -0.65387300 |
| H | 5.08557300  | 2.20026200  | 0.55907800  |
| C | 6.92757700  | -0.76169000 | -1.13186000 |
| H | 5.31324100  | -1.98435100 | -0.35392100 |
| C | 7.43749500  | 0.53159100  | -1.24473300 |
| H | 7.17068400  | 2.60303000  | -0.72143200 |
| H | 7.45238100  | -1.59550000 | -1.58622300 |
| H | 8.36212800  | 0.70554800  | -1.78448400 |
| N | 2.44948100  | 1.51877600  | -0.10666000 |
| H | 1.61941500  | 2.07558300  | 0.03826500  |
| C | 2.06447200  | -2.28882300 | 3.08912700  |
| H | 1.18138400  | -2.80567500 | 2.69547300  |
| H | 2.85007800  | -3.02124100 | 3.27836200  |
| H | 1.77309800  | -1.82447400 | 4.03527500  |
| H | 3.19791600  | 1.93056700  | -0.64385100 |

**TS5RR**

|   |             |             |             |
|---|-------------|-------------|-------------|
| C | 1.54071400  | 0.66283500  | 0.71499100  |
| C | 3.11226600  | 0.57021800  | 2.22816400  |
| C | 2.87747000  | -1.48503300 | 0.87166200  |
| H | 1.99041700  | -1.94310500 | 0.43170200  |
| N | 2.59093200  | 1.75331700  | 2.37759500  |
| N | 1.61676400  | 1.79915200  | 1.41357700  |
| N | 2.51084900  | -0.11522300 | 1.21521500  |
| C | 4.12353300  | -0.17484700 | 3.03329500  |
| H | 4.29416000  | 0.32222900  | 3.98785200  |
| H | 5.07693600  | -0.24839500 | 2.49050500  |
| C | 3.35279500  | -2.26545000 | 2.15119300  |
| O | 3.56229300  | -1.44595700 | 3.29370600  |
| C | 5.07458100  | -2.34473300 | 0.43946600  |
| C | 4.07497500  | -1.50717800 | -0.05305300 |
| C | 4.22889600  | -0.80957700 | -1.24402900 |
| C | 5.43655200  | -0.97949900 | -1.90858100 |
| C | 6.45832200  | -1.80756600 | -1.44575500 |
| C | 6.27226600  | -2.50187100 | -0.25740200 |
| C | 4.65117400  | -2.99384100 | 1.72919200  |
| H | 3.42433000  | -0.19251500 | -1.63387600 |
| H | 7.37513600  | -1.89264100 | -2.01519300 |
| H | 7.05414100  | -3.15140500 | 0.12194200  |
| H | 5.40628100  | -2.91318600 | 2.51691900  |
| H | 4.45889400  | -4.06015100 | 1.57228400  |
| C | 0.89751900  | 3.01603600  | 1.15888500  |
| C | 1.23388500  | 3.74733200  | 0.01824500  |
| C | -0.11492600 | 3.39144200  | 2.04455100  |
| C | 0.50823700  | 4.91360000  | -0.22763900 |
| C | -0.81260000 | 4.56143400  | 1.75129500  |
| C | -0.51420500 | 5.33284200  | 0.62468700  |
| H | 0.74528000  | 5.50186000  | -1.11048100 |
| H | -1.61480800 | 4.87419700  | 2.41526300  |
| C | -0.44447300 | 2.53958200  | 3.24114200  |
| H | 0.40813200  | 2.48299200  | 3.92435300  |
| H | -0.69172800 | 1.51275600  | 2.94503800  |
| H | -1.29503300 | 2.95730200  | 3.78221600  |
| C | 2.30895000  | 3.27383500  | -0.92418700 |
| H | 1.98224300  | 2.38389400  | -1.47476400 |
| H | 3.22378000  | 3.01015100  | -0.38376700 |
| H | 2.55045300  | 4.05218500  | -1.64962300 |
| H | 2.56004400  | -2.94640600 | 2.45166300  |
| C | -1.27758000 | 6.60340800  | 0.35233300  |
| H | -1.13820400 | 6.93658600  | -0.67837300 |

|   |             |             |             |
|---|-------------|-------------|-------------|
| H | -2.34696400 | 6.46239100  | 0.52996400  |
| H | -0.93895500 | 7.40736700  | 1.01373300  |
| N | 5.64999000  | -0.24864600 | -3.16291600 |
| O | 6.69095500  | -0.44429200 | -3.76952300 |
| O | 4.77973000  | 0.51975100  | -3.53303400 |
| C | -4.63165700 | 2.15401700  | -2.82880600 |
| C | -3.79273600 | 1.12152900  | -2.42028300 |
| C | -2.58728900 | 1.38967400  | -1.76150800 |
| C | -2.24923000 | 2.72518000  | -1.52185400 |
| C | -3.08885400 | 3.76175900  | -1.92557300 |
| C | -4.28473700 | 3.48142800  | -2.58041900 |
| H | -5.56299700 | 1.92155800  | -3.33648200 |
| H | -4.08117200 | 0.08927000  | -2.60734600 |
| H | -1.31639200 | 2.95305500  | -1.01281400 |
| H | -2.80300200 | 4.79094800  | -1.72362700 |
| H | -4.94263300 | 4.28672800  | -2.89226700 |
| C | -1.65043400 | 0.25668300  | -1.34319900 |
| H | -1.05911300 | -0.02527500 | -2.22619500 |
| C | -0.63785100 | 0.68672800  | -0.31955800 |
| C | 0.65782900  | 0.28006800  | -0.43077500 |
| O | 1.23759900  | -0.41264400 | -1.33915700 |
| H | -0.96217100 | 1.23714100  | 0.55797000  |
| C | -2.65204700 | -2.12942700 | -1.82559700 |
| C | -2.39704600 | -1.01474800 | -0.93118100 |
| C | -3.58761300 | -0.98812500 | -0.08189000 |
| N | -4.26800100 | -2.15943400 | -0.39840100 |
| H | -1.62477000 | -1.63925700 | -0.00966700 |
| N | -3.68976600 | -2.82766100 | -1.48116700 |
| C | -5.42422200 | -2.71121500 | 0.17940700  |
| C | -6.03836500 | -2.12961600 | 1.29839800  |
| C | -5.97325300 | -3.87895000 | -0.37408100 |
| C | -7.18141200 | -2.71327300 | 1.83800200  |
| H | -5.61660300 | -1.23078700 | 1.72425500  |
| C | -7.11380700 | -4.44443900 | 0.18190200  |
| H | -5.49357000 | -4.33021100 | -1.23221400 |
| C | -7.73073100 | -3.86880600 | 1.29120200  |
| H | -7.64446200 | -2.24992800 | 2.70429400  |
| H | -7.52252500 | -5.34837200 | -0.25998100 |
| H | -8.62135000 | -4.31496500 | 1.72126500  |
| N | -3.93809300 | -0.15912800 | 0.86140100  |
| H | -3.31909600 | 0.65189500  | 0.79331200  |
| C | -1.77820900 | -2.52732100 | -2.96822300 |
| H | -0.73127700 | -2.52917800 | -2.65047400 |
| H | -2.05529300 | -3.51530200 | -3.33857600 |

|   |             |             |             |
|---|-------------|-------------|-------------|
| H | -1.86681500 | -1.80520700 | -3.78732000 |
| C | -0.60026700 | -1.56032400 | 1.92862600  |
| O | -0.92685800 | -2.23629100 | 0.88145500  |
| O | -1.54160700 | -0.72925600 | 2.45490300  |
| H | -2.38693200 | -0.78786600 | 1.96753900  |
| O | 0.48025700  | -1.60995300 | 2.51255500  |

**TS5RS**

|   |             |             |             |
|---|-------------|-------------|-------------|
| C | 1.54287700  | -0.34462700 | -0.98319900 |
| C | 2.99228300  | -0.61108400 | -2.60491200 |
| C | 3.82263800  | 0.76899600  | -0.72840000 |
| H | 3.33191800  | 1.45437800  | -0.03757800 |
| N | 1.97626800  | -1.34034800 | -2.95558900 |
| N | 1.08660800  | -1.17915600 | -1.92464500 |
| N | 2.77207100  | 0.00836600  | -1.40638100 |
| C | 4.25971400  | -0.27318500 | -3.31812400 |
| H | 4.15649200  | -0.45615300 | -4.38732400 |
| H | 5.09771200  | -0.87062300 | -2.93208200 |
| C | 4.73267100  | 1.49879700  | -1.78574900 |
| O | 4.46538300  | 1.11461800  | -3.12680100 |
| C | 6.08560200  | 0.03973200  | -0.39253500 |
| C | 4.76307200  | -0.17477300 | -0.01141600 |
| C | 4.40997200  | -1.16634200 | 0.89372800  |
| C | 5.44688900  | -1.94831100 | 1.38365600  |
| C | 6.78206300  | -1.76426000 | 1.02734300  |
| C | 7.10617300  | -0.75409900 | 0.13048700  |
| C | 6.18900400  | 1.18102200  | -1.36827900 |
| H | 3.37784500  | -1.28477300 | 1.21360000  |
| H | 7.53973700  | -2.41217700 | 1.44964100  |
| H | 8.13875500  | -0.59613300 | -0.16240000 |
| H | 6.79201800  | 0.94243300  | -2.24952400 |
| H | 6.64692200  | 2.05213500  | -0.88944200 |
| C | -0.10278900 | -1.98642100 | -1.87465900 |
| C | -0.15800600 | -3.02291800 | -0.94143300 |
| C | -1.15018000 | -1.67866600 | -2.74678500 |
| C | -1.32674900 | -3.78502800 | -0.90813000 |
| C | -2.29099600 | -2.47112600 | -2.67231300 |
| C | -2.40360600 | -3.51405200 | -1.74932200 |
| H | -1.40617900 | -4.58531400 | -0.17669100 |
| H | -3.13004500 | -2.23505100 | -3.32049900 |
| C | -1.06658100 | -0.50098400 | -3.67933800 |
| H | -0.32782600 | -0.66743000 | -4.46919400 |
| H | -0.77251400 | 0.40012300  | -3.13112400 |
| H | -2.04171400 | -0.31189400 | -4.13054300 |

|   |             |             |             |
|---|-------------|-------------|-------------|
| C | 0.94908000  | -3.26176500 | 0.05012300  |
| H | 0.88800300  | -2.52758700 | 0.86395900  |
| H | 1.93934100  | -3.17263900 | -0.40840800 |
| H | 0.86149600  | -4.25773700 | 0.48748300  |
| H | 4.53286700  | 2.56961600  | -1.76842700 |
| C | -3.70369000 | -4.26155500 | -1.62144900 |
| H | -3.60539000 | -5.13025300 | -0.96663600 |
| H | -4.45716900 | -3.58866200 | -1.19750100 |
| H | -4.06791100 | -4.60034300 | -2.59542300 |
| N | 5.11948400  | -3.02927400 | 2.32130800  |
| O | 6.04264700  | -3.63956600 | 2.83497300  |
| O | 3.94293800  | -3.26476700 | 2.53203300  |
| C | -2.56504000 | -2.90259800 | 2.20279000  |
| C | -2.28074900 | -1.71069000 | 1.54538000  |
| C | -1.57375800 | -0.69207500 | 2.19439800  |
| C | -1.14194800 | -0.90386300 | 3.50376800  |
| C | -1.42175000 | -2.10091700 | 4.16433900  |
| C | -2.13776800 | -3.10346300 | 3.51643900  |
| H | -3.12622700 | -3.67793500 | 1.68706200  |
| H | -2.63615700 | -1.55024700 | 0.52942500  |
| H | -0.58020300 | -0.12164500 | 4.00823100  |
| H | -1.07680200 | -2.24863100 | 5.18354500  |
| H | -2.35856400 | -4.03530000 | 4.02823300  |
| C | -1.25265100 | 0.60159600  | 1.46362300  |
| H | -0.62455600 | 1.20416900  | 2.13817200  |
| C | -0.41960800 | 0.26664300  | 0.25068400  |
| C | 0.93017400  | 0.08157900  | 0.31541700  |
| O | 1.76534000  | 0.22773800  | 1.27602600  |
| H | -0.94625700 | 0.08119700  | -0.67875500 |
| C | -3.76837300 | 1.47898800  | 1.77291900  |
| C | -2.49237500 | 1.41289400  | 1.07817500  |
| C | -2.25880200 | 2.80567900  | 0.67417900  |
| N | -3.46214400 | 3.46250400  | 0.96522100  |
| H | -2.94889100 | 0.91884400  | -0.21561300 |
| N | -4.35573600 | 2.63343900  | 1.64178200  |
| C | -3.83699500 | 4.78917900  | 0.73480200  |
| C | -2.94669600 | 5.72869700  | 0.18831100  |
| C | -5.14188400 | 5.20048000  | 1.06142400  |
| C | -3.36664700 | 7.03918500  | -0.02119700 |
| H | -1.94359900 | 5.40982500  | -0.05671500 |
| C | -5.53758400 | 6.51388800  | 0.84477800  |
| H | -5.82721200 | 4.47737700  | 1.48302000  |
| C | -4.65734100 | 7.44885000  | 0.30175100  |
| H | -2.66258500 | 7.75111800  | -0.44306200 |

|   |             |             |             |
|---|-------------|-------------|-------------|
| H | -6.55069900 | 6.80733800  | 1.10498600  |
| H | -4.97202500 | 8.47394000  | 0.13516000  |
| N | -1.22602800 | 3.38308200  | 0.14705100  |
| H | -0.51064000 | 2.66320400  | 0.03260800  |
| C | -4.51583100 | 0.37910600  | 2.46167000  |
| H | -5.46740800 | 0.77170700  | 2.82702100  |
| H | -4.70024400 | -0.43710600 | 1.75753500  |
| H | -3.94561300 | -0.02997300 | 3.30034400  |
| C | -4.12084100 | -0.19727600 | -1.52078600 |
| O | -4.60316500 | -0.96545400 | -0.69562100 |
| O | -4.55627800 | -0.22531100 | -2.81347300 |
| H | -5.24193200 | -0.90689500 | -2.84226100 |
| O | -3.20998000 | 0.69396700  | -1.35409300 |

### TS5SR

|   |             |             |             |
|---|-------------|-------------|-------------|
| C | -2.30874400 | 0.16873400  | -0.78346900 |
| C | -3.88993500 | -1.34297800 | -0.87017700 |
| C | -1.63595500 | -2.25416200 | -1.18100400 |
| H | -0.67407700 | -1.86138500 | -1.52062100 |
| N | -4.51790500 | -0.22411600 | -0.65166800 |
| N | -3.51322900 | 0.70379400  | -0.59089000 |
| N | -2.53776400 | -1.14379900 | -0.94066300 |
| C | -4.36479700 | -2.71981400 | -1.21040900 |
| H | -5.42341400 | -2.70327000 | -1.46746300 |
| H | -4.21083500 | -3.40498600 | -0.36697200 |
| C | -2.22712000 | -3.19866600 | -2.26790800 |
| O | -3.64943100 | -3.12478600 | -2.36743900 |
| C | -1.50773600 | -4.48882400 | -0.35952700 |
| C | -1.46864300 | -3.14723200 | 0.02778900  |
| C | -1.27453900 | -2.77800900 | 1.34822700  |
| C | -1.09683200 | -3.80833300 | 2.26527400  |
| C | -1.11866200 | -5.15409900 | 1.91322400  |
| C | -1.32965700 | -5.49888500 | 0.58166300  |
| C | -1.74647000 | -4.60094200 | -1.84432200 |
| H | -1.26812300 | -1.74541400 | 1.68050800  |
| H | -0.97653500 | -5.90670300 | 2.67827800  |
| H | -1.35940900 | -6.54290600 | 0.28881200  |
| H | -2.48089800 | -5.36383200 | -2.11380300 |
| H | -0.80756500 | -4.83867900 | -2.35643200 |
| C | -3.76412000 | 2.07427100  | -0.24012200 |
| C | -3.54435800 | 2.45800100  | 1.08355800  |
| C | -4.17371800 | 2.95421600  | -1.24263700 |
| C | -3.77481200 | 3.79679900  | 1.40198400  |
| C | -4.39581000 | 4.27802400  | -0.87206500 |

|   |             |             |             |
|---|-------------|-------------|-------------|
| C | -4.20556200 | 4.71331000  | 0.44209600  |
| H | -3.61297800 | 4.12835800  | 2.42473500  |
| H | -4.71063100 | 4.99020800  | -1.63078400 |
| C | -4.30262600 | 2.47764000  | -2.66204900 |
| H | -5.02332700 | 1.65855300  | -2.74386200 |
| H | -3.32608000 | 2.10981800  | -2.99521400 |
| H | -4.62313700 | 3.29016000  | -3.31574000 |
| C | -3.04320500 | 1.48005000  | 2.11353100  |
| H | -1.97970300 | 1.26990900  | 1.94887600  |
| H | -3.58809000 | 0.53195100  | 2.06663500  |
| H | -3.15365300 | 1.89239600  | 3.11771700  |
| H | -1.85190200 | -2.90465000 | -3.24866400 |
| C | -4.47816500 | 6.14676200  | 0.81735300  |
| H | -3.91743500 | 6.43524900  | 1.70886700  |
| H | -4.20893800 | 6.82413500  | 0.00366300  |
| H | -5.54209300 | 6.29331300  | 1.03028600  |
| N | -0.87395500 | -3.45286500 | 3.67109000  |
| O | -0.76944600 | -4.35816800 | 4.48009600  |
| O | -0.80330800 | -2.26881900 | 3.95248200  |
| C | 0.30801700  | 3.70137900  | 2.80755400  |
| C | 0.32380300  | 3.03459000  | 1.58924100  |
| C | 1.33895400  | 2.11891400  | 1.27770300  |
| C | 2.34193300  | 1.89234600  | 2.21889500  |
| C | 2.32778500  | 2.55891600  | 3.44653900  |
| C | 1.31404600  | 3.46273300  | 3.74613200  |
| H | -0.48749200 | 4.40837800  | 3.02634100  |
| H | -0.46420400 | 3.21108000  | 0.85773700  |
| H | 3.14108800  | 1.19062600  | 1.99330600  |
| H | 3.11556900  | 2.36885400  | 4.16947700  |
| H | 1.30600300  | 3.97993200  | 4.70060000  |
| C | 1.26430000  | 1.39350300  | -0.06627200 |
| H | 1.13971900  | 2.16478400  | -0.83993700 |
| C | -0.02387400 | 0.61017000  | -0.11178600 |
| C | -1.03517700 | 0.94707700  | -0.95483500 |
| O | -1.09565800 | 1.80877900  | -1.90795600 |
| H | -0.19594700 | -0.15248300 | 0.64208300  |
| C | 2.90914300  | -0.67357100 | 0.13692500  |
| C | 2.49967700  | 0.59051900  | -0.44392600 |
| C | 3.76841000  | 1.29795400  | -0.64869100 |
| N | 4.75059600  | 0.33735900  | -0.36713100 |
| H | 2.11938600  | 0.30738800  | -1.78271200 |
| N | 4.19793700  | -0.84502400 | 0.12706300  |
| C | 6.14095600  | 0.41012300  | -0.50769300 |
| C | 6.78318000  | 1.58062600  | -0.94414300 |

|   |             |             |             |
|---|-------------|-------------|-------------|
| C | 6.91942300  | -0.72206600 | -0.20892200 |
| C | 8.16914200  | 1.59967900  | -1.07515600 |
| H | 6.18421300  | 2.45091100  | -1.17159400 |
| C | 8.30082000  | -0.67789600 | -0.34397500 |
| H | 6.42264900  | -1.62400400 | 0.12269500  |
| C | 8.94234900  | 0.48091600  | -0.77864900 |
| H | 8.64743400  | 2.51379500  | -1.41582500 |
| H | 8.88083600  | -1.56529100 | -0.10717200 |
| H | 10.02193100 | 0.50946800  | -0.88426400 |
| N | 4.02532800  | 2.50760000  | -1.03028500 |
| H | 3.13242600  | 2.98617500  | -1.15487300 |
| C | 2.02370400  | -1.76746600 | 0.64333800  |
| H | 1.29854600  | -2.04536000 | -0.12813700 |
| H | 2.62558700  | -2.63985700 | 0.90520400  |
| H | 1.46933700  | -1.44523800 | 1.53298200  |
| C | 0.75731500  | -0.64622500 | -2.99053800 |
| O | 1.54926900  | 0.36461600  | -2.83772600 |
| O | -0.48319000 | -0.32836200 | -3.43463100 |
| H | -0.64729100 | 0.61320200  | -3.17334000 |
| O | 1.01768300  | -1.82661400 | -2.76547200 |

**TS5SS**

|   |             |            |             |
|---|-------------|------------|-------------|
| C | -0.50264000 | 2.03844500 | -0.46364500 |
| C | -1.48598500 | 3.99866200 | -0.37448100 |
| C | -3.05806600 | 2.09556500 | -0.33058300 |
| H | -3.03105200 | 1.10396000 | -0.77964700 |
| N | -0.21632400 | 4.27297400 | -0.36578400 |
| N | 0.38436600  | 3.04287800 | -0.40656400 |
| N | -1.70576100 | 2.65150100 | -0.43488600 |
| C | -2.68265200 | 4.88930600 | -0.43393100 |
| H | -2.40138700 | 5.88204600 | -0.78434100 |
| H | -3.15388000 | 4.97953800 | 0.55478000  |
| C | -4.10002400 | 3.05770900 | -1.01182700 |
| O | -3.55781800 | 4.31560300 | -1.38762200 |
| C | -4.70999200 | 2.67974500 | 1.30889700  |
| C | -3.48833400 | 2.03751300 | 1.11849100  |
| C | -2.78965600 | 1.46025100 | 2.17088700  |
| C | -3.36736600 | 1.57738600 | 3.42823000  |
| C | -4.58825100 | 2.20998300 | 3.65726400  |
| C | -5.27142400 | 2.76403900 | 2.58239600  |
| C | -5.25615500 | 3.20227800 | 0.00731200  |
| H | -1.85822600 | 0.92612300 | 2.00328400  |
| H | -4.97959300 | 2.26287600 | 4.66525100  |
| H | -6.22226500 | 3.26218300 | 2.73916900  |

|   |             |             |             |
|---|-------------|-------------|-------------|
| H | -5.58295900 | 4.24497800  | 0.06418500  |
| H | -6.12021900 | 2.60980500  | -0.30929600 |
| C | 1.81070000  | 2.92380600  | -0.28071100 |
| C | 2.32776500  | 2.53334200  | 0.95790100  |
| C | 2.59181100  | 3.11169600  | -1.42026200 |
| C | 3.69636600  | 2.28605200  | 1.01684400  |
| C | 3.95770000  | 2.85394800  | -1.30693400 |
| C | 4.51829800  | 2.41894500  | -0.10436800 |
| H | 4.12553300  | 1.93810200  | 1.95418100  |
| H | 4.58995300  | 2.96656800  | -2.18442800 |
| C | 1.95699400  | 3.49751900  | -2.72970500 |
| H | 1.41998400  | 4.44689700  | -2.64777700 |
| H | 1.23026500  | 2.73878300  | -3.04394700 |
| H | 2.71231200  | 3.59117300  | -3.51135200 |
| C | 1.44246400  | 2.31581200  | 2.15381700  |
| H | 0.98446200  | 1.31726100  | 2.11161300  |
| H | 0.64805000  | 3.06706700  | 2.21110800  |
| H | 2.03243700  | 2.35812600  | 3.07225100  |
| H | -4.44466400 | 2.62360500  | -1.95003100 |
| C | 5.97564600  | 2.06013300  | -0.00013400 |
| H | 6.49461500  | 2.71840800  | 0.70370100  |
| H | 6.06192900  | 1.03442600  | 0.37274400  |
| H | 6.47616200  | 2.12991000  | -0.96860700 |
| N | -2.65100600 | 1.01610900  | 4.58062900  |
| O | -3.20294100 | 1.05351300  | 5.66868800  |
| O | -1.54256700 | 0.55110800  | 4.39009900  |
| C | 2.10406200  | -1.78663800 | -4.70883900 |
| C | 1.72431400  | -1.19928000 | -3.50156900 |
| C | 1.60446300  | -1.96108100 | -2.33826800 |
| C | 1.85124200  | -3.33674200 | -2.42137200 |
| C | 2.22641800  | -3.92774000 | -3.62253900 |
| C | 2.36156300  | -3.15207800 | -4.77426500 |
| H | 2.19513700  | -1.17247000 | -5.60020700 |
| H | 1.51612600  | -0.13412500 | -3.46427000 |
| H | 1.75443100  | -3.94067000 | -1.52413200 |
| H | 2.41743300  | -4.99618300 | -3.65988800 |
| H | 2.65899000  | -3.61026200 | -5.71261500 |
| C | 1.22031500  | -1.35185300 | -0.99483700 |
| H | 0.33839900  | -1.90300800 | -0.63804600 |
| C | 0.83423600  | 0.09731100  | -1.04782600 |
| C | -0.32634600 | 0.54953400  | -0.49184800 |
| O | -1.31743800 | -0.10409900 | 0.00185500  |
| H | 1.59010500  | 0.79670700  | -1.38543300 |
| C | 3.70919000  | -1.14407300 | -0.09787400 |

|   |            |             |             |
|---|------------|-------------|-------------|
| C | 2.32000600 | -1.53875200 | 0.05791300  |
| C | 2.00990900 | -1.13487600 | 1.43610000  |
| N | 3.26354500 | -0.83662400 | 1.99582800  |
| H | 2.49596500 | -2.92645100 | 0.33971700  |
| N | 4.27240600 | -0.82134700 | 1.02948800  |
| C | 3.58681900 | -0.42851900 | 3.29117400  |
| C | 2.61832200 | -0.32879900 | 4.30596100  |
| C | 4.92254700 | -0.10407200 | 3.59494900  |
| C | 2.99157300 | 0.09613900  | 5.57788300  |
| H | 1.59136900 | -0.57235900 | 4.07213300  |
| C | 5.27010400 | 0.31759300  | 4.87239800  |
| H | 5.66917900 | -0.19126800 | 2.81633700  |
| C | 4.31131400 | 0.42404100  | 5.87837700  |
| H | 2.22702300 | 0.17157200  | 6.34613400  |
| H | 6.30781800 | 0.56210400  | 5.08149300  |
| H | 4.58831300 | 0.75392500  | 6.87427400  |
| N | 0.89416500 | -1.07720500 | 2.08467300  |
| H | 0.12608500 | -1.23942800 | 1.42999800  |
| C | 4.51502600 | -1.14486900 | -1.35555200 |
| H | 4.15003600 | -0.36971800 | -2.03955600 |
| H | 5.56324800 | -0.94588800 | -1.11945500 |
| H | 4.42871000 | -2.11211500 | -1.85574400 |
| C | 3.59852100 | -4.66945800 | 0.27028400  |
| O | 4.42558000 | -4.24967000 | -0.52972700 |
| O | 3.72548700 | -5.92348200 | 0.79123000  |
| H | 4.53031200 | -6.28765700 | 0.39873000  |
| O | 2.55081800 | -4.07475300 | 0.72180800  |

### M5R

|   |             |             |             |
|---|-------------|-------------|-------------|
| C | -1.09441500 | 0.49694200  | -0.84732500 |
| C | -2.40524000 | -0.00925500 | -2.53155400 |
| C | -2.20079700 | -1.81982100 | -0.86723400 |
| H | -1.36575200 | -2.14533500 | -0.25240300 |
| N | -2.01377200 | 1.20368200  | -2.78154700 |
| N | -1.20679200 | 1.51142400  | -1.72000000 |
| N | -1.86589300 | -0.48178300 | -1.36774200 |
| C | -3.21860500 | -0.95702500 | -3.34787800 |
| H | -3.28593400 | -0.60849100 | -4.37813300 |
| H | -4.23283000 | -1.05497700 | -2.93505600 |
| C | -2.45575300 | -2.81165300 | -2.06090000 |
| O | -2.52136400 | -2.18586400 | -3.33640500 |
| C | -4.38894600 | -2.75493400 | -0.58299100 |
| C | -3.49930200 | -1.79820500 | -0.09675700 |
| C | -3.82520900 | -0.97059500 | 0.96886700  |

|   |             |             |             |
|---|-------------|-------------|-------------|
| C | -5.09721700 | -1.12559400 | 1.50584200  |
| C | -6.01616000 | -2.06501600 | 1.04030200  |
| C | -5.65428000 | -2.89448500 | -0.01352600 |
| C | -3.77488600 | -3.54283000 | -1.70930200 |
| H | -3.10688600 | -0.26572100 | 1.37563700  |
| H | -6.99096400 | -2.13417800 | 1.50620500  |
| H | -6.35329200 | -3.63477900 | -0.38809400 |
| H | -4.42126300 | -3.60649400 | -2.59022200 |
| H | -3.56630900 | -4.56751600 | -1.38595200 |
| C | -0.61519600 | 2.81814100  | -1.63965900 |
| C | -1.24385100 | 3.77752300  | -0.84859500 |
| C | 0.59246700  | 3.03909300  | -2.30849000 |
| C | -0.61936100 | 5.02113400  | -0.73625500 |
| C | 1.17684300  | 4.29415800  | -2.16247500 |
| C | 0.58939800  | 5.29148600  | -1.37768800 |
| H | -1.08294500 | 5.78785500  | -0.12046300 |
| H | 2.12446000  | 4.49306900  | -2.65713400 |
| C | 1.27196500  | 1.92646100  | -3.06131100 |
| H | 2.08941800  | 2.31828700  | -3.66844000 |
| H | 0.57361600  | 1.39679300  | -3.71449800 |
| H | 1.69478600  | 1.19687100  | -2.35758200 |
| C | -2.50698200 | 3.45158000  | -0.09849800 |
| H | -2.28944700 | 2.75272600  | 0.71825300  |
| H | -3.24942300 | 2.98172400  | -0.75019900 |
| H | -2.94392400 | 4.35346000  | 0.33254100  |
| H | -1.60822300 | -3.49360400 | -2.12308400 |
| C | 1.27305300  | 6.62448400  | -1.21907800 |
| H | 1.41962300  | 7.10721700  | -2.18956500 |
| H | 0.69071500  | 7.29648300  | -0.58547000 |
| H | 2.26023900  | 6.49482100  | -0.76522800 |
| N | -5.49461400 | -0.25729200 | 2.61933200  |
| O | -6.60012600 | -0.42273500 | 3.10856800  |
| O | -4.70267500 | 0.58924000  | 2.99515100  |
| C | 4.38635800  | 3.52504200  | 2.83556800  |
| C | 3.68910300  | 2.34545800  | 2.58114600  |
| C | 2.38444000  | 2.37739700  | 2.08292900  |
| C | 1.79792400  | 3.62544100  | 1.84105900  |
| C | 2.49120100  | 4.80618400  | 2.09282800  |
| C | 3.79143100  | 4.76095100  | 2.59241000  |
| H | 5.40136000  | 3.47669600  | 3.21868500  |
| H | 4.15775500  | 1.38169200  | 2.75940800  |
| H | 0.78602400  | 3.66826000  | 1.44495300  |
| H | 2.01230300  | 5.76247600  | 1.89980500  |
| H | 4.33660100  | 5.67932500  | 2.78723900  |

|   |             |             |             |
|---|-------------|-------------|-------------|
| C | 1.59473700  | 1.09762100  | 1.82188300  |
| H | 0.95437200  | 0.91686500  | 2.69918400  |
| C | 0.68898700  | 1.24597600  | 0.62554900  |
| C | -0.35226900 | 0.38445900  | 0.44618800  |
| O | -0.74751200 | -0.56258000 | 1.22093100  |
| H | 0.96549200  | 1.96212900  | -0.13319700 |
| C | 2.31385900  | -1.34625800 | 2.30458200  |
| C | 2.43256700  | -0.13973700 | 1.64602600  |
| C | 3.35553900  | -0.34914800 | 0.55723200  |
| N | 3.72590700  | -1.69410900 | 0.68403100  |
| H | 1.01460600  | -1.79319700 | 0.42117500  |
| N | 3.08383600  | -2.31511200 | 1.76224200  |
| C | 4.58398300  | -2.46105100 | -0.10748800 |
| C | 5.14411900  | -1.95762000 | -1.29393600 |
| C | 4.89473000  | -3.77420700 | 0.28849800  |
| C | 5.99363300  | -2.75940900 | -2.05017300 |
| H | 4.90235500  | -0.94695200 | -1.59173600 |
| C | 5.74430300  | -4.55600400 | -0.48399600 |
| H | 4.47016000  | -4.16572600 | 1.20383100  |
| C | 6.30408000  | -4.05932100 | -1.65976100 |
| H | 6.41596500  | -2.35401200 | -2.96543000 |
| H | 5.97096000  | -5.56707000 | -0.15805800 |
| H | 6.96652800  | -4.67473900 | -2.25966600 |
| N | 3.80685400  | 0.45192400  | -0.37239700 |
| H | 3.40068100  | 1.37094800  | -0.19304500 |
| C | 1.40264200  | -1.68816700 | 3.44223600  |
| H | 0.39219300  | -1.34413800 | 3.20310700  |
| H | 1.39072300  | -2.76882900 | 3.60318000  |
| H | 1.72790500  | -1.20664500 | 4.36957000  |
| C | 0.84259200  | -3.65168300 | -0.16675300 |
| O | 0.86806700  | -2.31631500 | -0.39199900 |
| O | 1.53119000  | -4.09850200 | 0.85024800  |
| H | 2.21489500  | -3.37266800 | 1.26619300  |
| O | 0.19620900  | -4.36389000 | -0.91220200 |

**M5R'**

|   |             |             |            |
|---|-------------|-------------|------------|
| C | 0.97470400  | -0.64551200 | 0.98140600 |
| C | 0.09555400  | -1.82395000 | 2.62552900 |
| C | -1.40688200 | -0.11199800 | 1.71500300 |
| H | -1.31167200 | 0.86829700  | 1.25072900 |
| N | 1.17788000  | -2.48010600 | 2.30758700 |
| N | 1.71287300  | -1.73618100 | 1.26093800 |
| N | -0.06854600 | -0.70002200 | 1.85753100 |
| C | -0.98689300 | -2.11906800 | 3.62026500 |

|   |             |             |             |
|---|-------------|-------------|-------------|
| H | -0.58186300 | -2.64654900 | 4.48722700  |
| H | -1.75483400 | -2.75327100 | 3.15206600  |
| C | -2.10115400 | -0.00699600 | 3.10556800  |
| O | -1.53144300 | -0.89264300 | 4.09154200  |
| C | -3.54270500 | -1.16823200 | 1.55737200  |
| C | -2.31036100 | -1.02986000 | 0.92005400  |
| C | -2.01260900 | -1.68160900 | -0.27116600 |
| C | -3.00166200 | -2.52497200 | -0.78348200 |
| C | -4.25763200 | -2.66470600 | -0.17713700 |
| C | -4.53400000 | -1.98046000 | 1.00031700  |
| C | -3.58575400 | -0.31470100 | 2.79987900  |
| H | -1.06829900 | -1.55981500 | -0.78317000 |
| H | -4.99553300 | -3.30316700 | -0.64547400 |
| H | -5.51177200 | -2.06290900 | 1.46418700  |
| H | -4.07739100 | -0.78248800 | 3.65927600  |
| H | -4.10909400 | 0.62496200  | 2.57380200  |
| C | 2.90548700  | -2.15107900 | 0.57779500  |
| C | 2.78402200  | -3.12367400 | -0.42346300 |
| C | 4.11443400  | -1.52018900 | 0.88783800  |
| C | 3.95343400  | -3.51380100 | -1.07787200 |
| C | 5.25316900  | -1.93808000 | 0.19567500  |
| C | 5.19308400  | -2.93804600 | -0.77826900 |
| H | 3.88732800  | -4.26103700 | -1.86580100 |
| H | 6.20222800  | -1.45051000 | 0.40576900  |
| C | 4.16631100  | -0.37509100 | 1.86687900  |
| H | 3.60902200  | -0.59608700 | 2.78437000  |
| H | 3.72291900  | 0.51761400  | 1.40898200  |
| H | 5.19932000  | -0.13786800 | 2.13778300  |
| C | 1.43101100  | -3.63025500 | -0.84694300 |
| H | 0.90022300  | -2.82660300 | -1.37076400 |
| H | 0.81610200  | -3.93562600 | 0.00614500  |
| H | 1.51848200  | -4.48005300 | -1.52979100 |
| H | -1.96918900 | 0.98736400  | 3.53559100  |
| C | 6.44390000  | -3.38861200 | -1.49601500 |
| H | 6.92365400  | -4.22662000 | -0.97137800 |
| H | 6.22000800  | -3.72639600 | -2.51374600 |
| H | 7.17888000  | -2.57922300 | -1.56211000 |
| N | -2.71726100 | -3.28402200 | -1.99371300 |
| O | -3.63478400 | -3.94894100 | -2.49576400 |
| O | -1.57039200 | -3.24295100 | -2.45174700 |
| C | 3.16094600  | 5.30691900  | -0.08559200 |
| C | 2.45744000  | 4.10021700  | -0.08614400 |
| C | 1.18573500  | 4.00693200  | -0.66138000 |
| C | 0.62966500  | 5.15951500  | -1.23321600 |

|   |             |             |             |
|---|-------------|-------------|-------------|
| C | 1.32468100  | 6.36820100  | -1.23107000 |
| C | 2.59658900  | 6.44907700  | -0.65597900 |
| H | 4.15245700  | 5.34932500  | 0.36042900  |
| H | 2.90860000  | 3.20818500  | 0.33934600  |
| H | -0.36062800 | 5.09250900  | -1.67608100 |
| H | 0.87365100  | 7.25013600  | -1.68127000 |
| H | 3.13950000  | 7.39185100  | -0.65347000 |
| C | 0.45190300  | 2.67829100  | -0.74301700 |
| H | 0.64650000  | 2.28539000  | -1.74979500 |
| C | 0.87910300  | 1.61765900  | 0.24153500  |
| C | 1.14474200  | 0.31861800  | -0.10388300 |
| O | 1.48570300  | -0.18956700 | -1.26401700 |
| H | 0.69814400  | 1.84934200  | 1.28916300  |
| C | -1.75784500 | 3.37449800  | 0.53075700  |
| C | -1.03808000 | 2.72524600  | -0.49926300 |
| C | -1.93967400 | 1.74500200  | -1.04569800 |
| N | -3.15743800 | 1.98064400  | -0.35356300 |
| H | 4.69009600  | 3.53699600  | -2.30464000 |
| N | -3.01876500 | 2.96100800  | 0.63302300  |
| C | -4.40569800 | 1.37612300  | -0.51662700 |
| C | -4.66440700 | 0.46639200  | -1.56226700 |
| C | -5.44836500 | 1.68693200  | 0.38359500  |
| C | -5.92471200 | -0.11491300 | -1.68159700 |
| H | -3.85760400 | 0.22243200  | -2.24139600 |
| C | -6.69795500 | 1.08623600  | 0.24889900  |
| H | -5.25665600 | 2.41209000  | 1.16464600  |
| C | -6.95333900 | 0.17843400  | -0.78242100 |
| H | -6.09564400 | -0.82101500 | -2.49179700 |
| H | -7.48394000 | 1.34161800  | 0.95787800  |
| H | -7.93075600 | -0.28769200 | -0.88332700 |
| N | -1.78772400 | 0.75666500  | -1.89393800 |
| H | -0.81272600 | 0.72125100  | -2.19921500 |
| C | -1.26776700 | 4.42706200  | 1.48299200  |
| H | -2.02456400 | 4.60753900  | 2.25325000  |
| H | -0.33011600 | 4.12604100  | 1.96729200  |
| H | -1.05517200 | 5.37107200  | 0.96769000  |
| C | 3.72020900  | 1.95825400  | -2.15498500 |
| O | 2.87596400  | 2.37938100  | -2.92794300 |
| O | 3.73664800  | 0.82258200  | -1.50570700 |
| H | 2.77138300  | 0.36673200  | -1.55062100 |
| O | 4.83828200  | 2.69091900  | -1.84978800 |

**M5S**

|   |             |            |             |
|---|-------------|------------|-------------|
| C | -0.94081500 | 1.94483800 | -0.63958000 |
|---|-------------|------------|-------------|

|   |             |             |             |
|---|-------------|-------------|-------------|
| C | -0.69312400 | 2.61584500  | -2.71461800 |
| C | 1.39044900  | 2.63955900  | -1.37998400 |
| H | 1.65996100  | 2.75754100  | -0.31526400 |
| N | -1.92356200 | 2.17296600  | -2.67133400 |
| N | -2.05597600 | 1.75043000  | -1.35659300 |
| N | -0.06682200 | 2.50789600  | -1.50049100 |
| C | 0.12320700  | 3.19351500  | -3.82924600 |
| H | -0.51888200 | 3.65791400  | -4.58092000 |
| H | 0.71262100  | 2.39731300  | -4.30937200 |
| C | 1.90577600  | 3.80580200  | -2.28451100 |
| O | 0.95607800  | 4.21371200  | -3.29216100 |
| C | 3.12205600  | 1.76810700  | -2.79433500 |
| C | 2.07762700  | 1.41490600  | -1.93907600 |
| C | 1.77922700  | 0.09408300  | -1.64887800 |
| C | 2.58206000  | -0.88480800 | -2.22704100 |
| C | 3.65193500  | -0.56325100 | -3.07172900 |
| C | 3.91754300  | 0.77179400  | -3.36604900 |
| C | 3.22714000  | 3.27045600  | -2.89931200 |
| H | 1.00104000  | -0.18206900 | -0.95301800 |
| H | 4.26254900  | -1.36351200 | -3.47017500 |
| H | 4.75752800  | 1.02980600  | -4.00377600 |
| H | 3.35087400  | 3.64648800  | -3.92142400 |
| H | 4.08402700  | 3.61950900  | -2.30929000 |
| C | -3.21216500 | 1.10161300  | -0.79806900 |
| C | -3.35031100 | -0.27875400 | -0.98780800 |
| C | -3.99603000 | 1.84080700  | 0.09835400  |
| C | -4.29824200 | -0.93610700 | -0.19762000 |
| C | -4.91559500 | 1.13386500  | 0.87106100  |
| C | -5.05179700 | -0.25362800 | 0.76321400  |
| H | -4.40641500 | -2.01379800 | -0.29764400 |
| H | -5.48356300 | 1.66851600  | 1.62685500  |
| C | -3.79287000 | 3.32603600  | 0.26442800  |
| H | -3.86382900 | 3.84336600  | -0.70043900 |
| H | -2.80587900 | 3.53676000  | 0.69011400  |
| H | -4.54165900 | 3.74222000  | 0.94275400  |
| C | -2.46514600 | -1.03512500 | -1.95039600 |
| H | -1.44402800 | -1.15376300 | -1.56542000 |
| H | -2.38832600 | -0.51990400 | -2.91337800 |
| H | -2.85831600 | -2.04049700 | -2.12740000 |
| H | 2.06244100  | 4.71383400  | -1.70026200 |
| C | -5.94558500 | -0.99165900 | 1.72981600  |
| H | -6.01309800 | -2.05812800 | 1.49068900  |
| H | -5.53941000 | -0.88883900 | 2.74377300  |
| H | -6.96168100 | -0.57821800 | 1.74115400  |

|   |             |             |             |
|---|-------------|-------------|-------------|
| N | 2.25380400  | -2.28279600 | -1.97873300 |
| O | 3.09041900  | -3.14384900 | -2.27461100 |
| O | 1.11775900  | -2.53942200 | -1.55111500 |
| C | -2.38870000 | -2.52779500 | 3.64112800  |
| C | -1.73740200 | -1.57613700 | 2.85095800  |
| C | -0.40935800 | -1.21450100 | 3.10573000  |
| C | 0.25533800  | -1.84034600 | 4.16945100  |
| C | -0.38783600 | -2.79141600 | 4.95875800  |
| C | -1.71755200 | -3.14081400 | 4.70018600  |
| H | -3.42261400 | -2.78871200 | 3.42140700  |
| H | -2.27614600 | -1.08456900 | 2.04595700  |
| H | 1.28833200  | -1.56667600 | 4.36775800  |
| H | 0.14750300  | -3.26063100 | 5.78158600  |
| H | -2.21975700 | -3.88468200 | 5.31514300  |
| C | 0.27758200  | -0.10676800 | 2.32090100  |
| H | 0.32592600  | 0.74912400  | 3.00806700  |
| C | -0.47982300 | 0.35153400  | 1.09821200  |
| C | -0.70351400 | 1.65489200  | 0.79978500  |
| O | -0.66841200 | 2.73430500  | 1.54543400  |
| H | -0.62534700 | -0.39517900 | 0.32186200  |
| C | 2.26774400  | -1.59188800 | 1.34897500  |
| C | 1.67696200  | -0.40344400 | 1.81922100  |
| C | 2.55598200  | 0.66200400  | 1.41922200  |
| N | 3.63651200  | -0.00881100 | 0.79113900  |
| H | -1.77428100 | 2.54815100  | 2.53365900  |
| N | 3.44029000  | -1.38803300 | 0.74397200  |
| C | 4.74972700  | 0.51643500  | 0.13911100  |
| C | 4.99418700  | 1.90451600  | 0.06457100  |
| C | 5.65851100  | -0.36504400 | -0.48810000 |
| C | 6.09506600  | 2.37928100  | -0.64894600 |
| H | 4.30837600  | 2.57061100  | 0.57309000  |
| C | 6.74700000  | 0.13257000  | -1.19449900 |
| H | 5.46428500  | -1.42823100 | -0.42914500 |
| C | 6.97540000  | 1.50956100  | -1.29680100 |
| H | 6.26574000  | 3.45448100  | -0.69118500 |
| H | 7.42412300  | -0.56824000 | -1.68006500 |
| H | 7.82831500  | 1.89219300  | -1.85305200 |
| N | 2.47370300  | 1.97484200  | 1.50216300  |
| H | 1.61289200  | 2.22505600  | 1.99215100  |
| C | 1.75334600  | -2.99989500 | 1.42871900  |
| H | 0.70468000  | -3.05639700 | 1.12057800  |
| H | 2.34255300  | -3.63994400 | 0.76603700  |
| H | 1.80885300  | -3.39430400 | 2.45080400  |
| C | -2.51510400 | 1.42854800  | 3.94381100  |

|   |             |            |            |
|---|-------------|------------|------------|
| O | -1.51816000 | 1.25578400 | 4.61924500 |
| O | -3.65956100 | 0.70081700 | 4.14505300 |
| H | -3.39619300 | 0.02672600 | 4.79520200 |
| O | -2.69407600 | 2.28590200 | 2.96638700 |

**M5S'**

|   |             |             |             |
|---|-------------|-------------|-------------|
| C | -1.16325800 | 0.66748600  | 0.92869200  |
| C | -2.67679900 | 0.05905400  | 2.43689800  |
| C | -3.59868300 | 0.30193700  | 0.16748700  |
| H | -3.34580100 | 0.93876400  | -0.67974000 |
| N | -1.56300000 | 0.06263500  | 3.10521300  |
| N | -0.60662000 | 0.42870600  | 2.16050600  |
| N | -2.50460700 | 0.42207900  | 1.12736200  |
| C | -4.06979700 | -0.24012400 | 2.88175000  |
| H | -4.16400500 | -0.11297300 | 3.96190400  |
| H | -4.34163300 | -1.27575800 | 2.62427400  |
| C | -4.96612000 | 0.69195300  | 0.83230200  |
| O | -4.95225300 | 0.69557400  | 2.26578600  |
| C | -5.14163500 | -1.49580800 | -0.20654400 |
| C | -3.79337700 | -1.13293600 | -0.27851600 |
| C | -2.80937600 | -2.03168500 | -0.68481700 |
| C | -3.24032100 | -3.31990700 | -1.00433900 |
| C | -4.58402800 | -3.70482800 | -0.96726200 |
| C | -5.54646400 | -2.78324800 | -0.56146000 |
| C | -5.98338500 | -0.33428300 | 0.26426700  |
| H | -1.76286800 | -1.75256100 | -0.77087600 |
| H | -4.84708200 | -4.71878900 | -1.24274100 |
| H | -6.59281400 | -3.07284400 | -0.51074900 |
| H | -6.72050200 | -0.60172700 | 1.02920000  |
| H | -6.53442600 | 0.10758400  | -0.57702600 |
| C | 0.77863400  | 0.16548700  | 2.43086700  |
| C | 1.30908400  | -1.07100900 | 2.02523400  |
| C | 1.55171400  | 1.16629200  | 3.02791800  |
| C | 2.68191700  | -1.25913300 | 2.19075500  |
| C | 2.92139000  | 0.92759600  | 3.17289800  |
| C | 3.50252600  | -0.26827400 | 2.73685900  |
| H | 3.12749900  | -2.18514400 | 1.83884600  |
| H | 3.54983200  | 1.70318900  | 3.60612700  |
| C | 0.92311000  | 2.47678500  | 3.43570800  |
| H | 0.08665300  | 2.32045400  | 4.12672000  |
| H | 0.52132900  | 3.00887500  | 2.56367800  |
| H | 1.65611500  | 3.12913500  | 3.92044500  |
| C | 0.45403800  | -2.12629600 | 1.37770200  |
| H | 0.32057600  | -1.91063300 | 0.30791900  |

|   |             |             |             |
|---|-------------|-------------|-------------|
| H | -0.53546400 | -2.19191200 | 1.84421100  |
| H | 0.93201100  | -3.10719100 | 1.43548800  |
| H | -5.23685100 | 1.71697000  | 0.57144800  |
| C | 4.99245200  | -0.49506300 | 2.79853500  |
| H | 5.24074200  | -1.36478300 | 3.42050800  |
| H | 5.36204100  | -0.69534400 | 1.78642300  |
| H | 5.52183400  | 0.37477800  | 3.20248900  |
| N | -2.24247700 | -4.34426200 | -1.35468700 |
| O | -2.63680400 | -5.33917200 | -1.97232300 |
| O | -1.08643500 | -4.15869300 | -0.98715300 |
| C | 2.08342300  | 5.43034200  | -1.91206300 |
| C | 1.57573600  | 4.19808800  | -1.49270300 |
| C | 2.06745300  | 3.00127700  | -2.02283900 |
| C | 3.08207100  | 3.06561100  | -2.98774800 |
| C | 3.59674700  | 4.29158800  | -3.40431900 |
| C | 3.09991300  | 5.48347100  | -2.86612900 |
| H | 1.67603300  | 6.34869900  | -1.49503400 |
| H | 0.76085700  | 4.15893500  | -0.77497700 |
| H | 3.46179700  | 2.13579000  | -3.40323800 |
| H | 4.38506500  | 4.31928800  | -4.15379200 |
| H | 3.50029800  | 6.44151100  | -3.19105600 |
| C | 1.45129500  | 1.66683700  | -1.65219300 |
| H | 0.76906900  | 1.41445300  | -2.47342300 |
| C | 0.67808800  | 1.60329600  | -0.36755000 |
| C | -0.59266600 | 1.06889000  | -0.32494700 |
| O | -1.37325600 | 0.89736500  | -1.39466800 |
| H | 1.22795000  | 1.80416800  | 0.54269900  |
| C | 3.64852000  | 0.43877900  | -0.79159400 |
| C | 2.37920400  | 0.50657700  | -1.41537800 |
| C | 1.92928600  | -0.85909200 | -1.54498300 |
| N | 3.02563300  | -1.62019100 | -1.06317400 |
| H | -1.55441600 | 2.14745300  | -1.96880400 |
| N | 4.05967200  | -0.80730200 | -0.60205600 |
| C | 3.13847700  | -3.00180700 | -0.88577700 |
| C | 2.10385800  | -3.88506100 | -1.25573100 |
| C | 4.30655000  | -3.53406600 | -0.29802200 |
| C | 2.23551600  | -5.25069700 | -1.01474100 |
| H | 1.20866500  | -3.47578900 | -1.70247800 |
| C | 4.41963300  | -4.90454700 | -0.07543400 |
| H | 5.10589100  | -2.85633500 | -0.02668600 |
| C | 3.38688400  | -5.77902500 | -0.42470300 |
| H | 1.40798800  | -5.90120000 | -1.28925400 |
| H | 5.33001800  | -5.29034200 | 0.38074400  |
| H | 3.47798400  | -6.84704700 | -0.23946500 |

|   |             |             |             |
|---|-------------|-------------|-------------|
| N | 0.79619300  | -1.38748600 | -1.93469900 |
| H | 0.15174400  | -0.64002100 | -2.19926600 |
| C | 4.51484400  | 1.56252200  | -0.30364400 |
| H | 4.01831000  | 2.11234100  | 0.50725700  |
| H | 5.45496300  | 1.15796100  | 0.08418500  |
| H | 4.73705100  | 2.28818500  | -1.09236100 |
| C | -1.07351200 | 3.53502400  | -3.29216900 |
| O | -0.46448500 | 2.82118100  | -4.07454500 |
| O | -1.14337300 | 4.89258500  | -3.47579000 |
| H | -0.56702000 | 5.05211000  | -4.24143900 |
| O | -1.72601500 | 3.19155100  | -2.21573900 |

**TS5<sup>D</sup>**

|   |             |             |             |
|---|-------------|-------------|-------------|
| C | -1.91209500 | -0.41426200 | 0.15675300  |
| C | -3.60992400 | -1.11879400 | -1.01571500 |
| C | -2.93614500 | -2.61037200 | 0.88960600  |
| H | -1.93385700 | -3.03304500 | 1.01959100  |
| N | -3.26584300 | 0.01157300  | -1.56364400 |
| N | -2.20582400 | 0.43407400  | -0.81879100 |
| N | -2.80337300 | -1.41216700 | 0.05542000  |
| C | -4.66633900 | -2.09467000 | -1.43737300 |
| H | -4.29531500 | -2.68280800 | -2.28802800 |
| H | -5.56845000 | -1.56322400 | -1.74122600 |
| C | -3.88327700 | -3.62140400 | 0.19358500  |
| O | -4.99490700 | -2.92254900 | -0.34582500 |
| C | -4.46732500 | -3.46016000 | 2.48890700  |
| C | -3.62313500 | -2.37917200 | 2.21956900  |
| C | -3.49226900 | -1.31570800 | 3.09564500  |
| C | -4.25269600 | -1.38234600 | 4.25925000  |
| C | -5.09576800 | -2.44460400 | 4.56581800  |
| C | -5.20352100 | -3.50198600 | 3.66670400  |
| C | -4.42704500 | -4.45653100 | 1.35516300  |
| H | -2.83229700 | -0.47182900 | 2.91184500  |
| H | -5.66092700 | -2.42797800 | 5.48899700  |
| H | -5.86573700 | -4.33381400 | 3.88058700  |
| H | -5.40280200 | -4.87717400 | 1.10470700  |
| H | -3.74393200 | -5.28102600 | 1.58535200  |
| C | -1.56663600 | 1.70919500  | -1.03500800 |
| C | -1.99962300 | 2.77690600  | -0.23899400 |
| C | -0.54856100 | 1.81251400  | -1.98332900 |
| C | -1.37599600 | 4.00245200  | -0.43772100 |
| C | 0.05715000  | 3.06317000  | -2.12614600 |
| C | -0.34951700 | 4.16428800  | -1.37471500 |
| H | -1.69037200 | 4.85445700  | 0.15979300  |

|   |             |             |             |
|---|-------------|-------------|-------------|
| H | 0.87379100  | 3.17259400  | -2.83626400 |
| C | -0.11829700 | 0.65089800  | -2.83948100 |
| H | -0.68819300 | 0.62953100  | -3.77382000 |
| H | -0.27097500 | -0.30915900 | -2.33888100 |
| H | 0.94286300  | 0.74673900  | -3.08445900 |
| C | -3.08269900 | 2.59105300  | 0.79098800  |
| H | -2.71180600 | 1.98426400  | 1.62464200  |
| H | -3.95660800 | 2.08839000  | 0.36429000  |
| H | -3.40200400 | 3.55671600  | 1.18488100  |
| H | -3.37636600 | -4.20193100 | -0.58607500 |
| C | 0.28533300  | 5.51607000  | -1.56346100 |
| H | -0.44475900 | 6.22555700  | -1.96631900 |
| H | 0.64092900  | 5.90825900  | -0.60719100 |
| H | 1.13987300  | 5.46606300  | -2.24208500 |
| N | -4.16390300 | -0.26417100 | 5.20703200  |
| O | -4.77460900 | -0.35750200 | 6.25784100  |
| O | -3.48626400 | 0.69672000  | 4.88920800  |
| C | 3.12602800  | -3.75567000 | 2.12690500  |
| C | 2.26123900  | -2.71468700 | 1.79325000  |
| C | 2.75497200  | -1.44138400 | 1.50558300  |
| C | 4.13608000  | -1.22814900 | 1.56055600  |
| C | 5.00206200  | -2.26579700 | 1.89128600  |
| C | 4.49948400  | -3.53531200 | 2.17423200  |
| H | 2.72456900  | -4.74024900 | 2.34656900  |
| H | 1.18921400  | -2.89105900 | 1.75792100  |
| H | 4.52938200  | -0.24105700 | 1.32988300  |
| H | 6.07172200  | -2.08411900 | 1.92490100  |
| H | 5.17465300  | -4.34605000 | 2.42830600  |
| C | 1.82013600  | -0.29928500 | 1.17356700  |
| H | 1.60897500  | 0.25846800  | 2.09649600  |
| C | 0.47145600  | -0.66761800 | 0.54511800  |
| C | -0.74465600 | -0.24024800 | 1.12217100  |
| O | -0.94695900 | 0.40251800  | 2.16134400  |
| H | 0.44513500  | -1.49923600 | -0.15961200 |
| C | 2.98879400  | 0.43280500  | -1.11219700 |
| C | 2.28791500  | 0.69669900  | 0.11809600  |
| C | 2.41024500  | 2.13433300  | 0.32560900  |
| N | 3.07590200  | 2.57036800  | -0.82908100 |
| H | 0.88736100  | 0.36161400  | -0.23836600 |
| N | 3.39314400  | 1.52787500  | -1.69276700 |
| C | 3.35319300  | 3.88032400  | -1.23735800 |
| C | 3.39627700  | 4.94089500  | -0.32080600 |
| C | 3.61369400  | 4.13409800  | -2.59411000 |
| C | 3.67405500  | 6.22861800  | -0.77059500 |

|   |            |             |             |
|---|------------|-------------|-------------|
| H | 3.19055800 | 4.74180000  | 0.72148800  |
| C | 3.89312100 | 5.42669600  | -3.02167900 |
| H | 3.59399100 | 3.30773700  | -3.29337100 |
| C | 3.92021400 | 6.48691800  | -2.11659200 |
| H | 3.70048900 | 7.04103800  | -0.05003500 |
| H | 4.08818100 | 5.60498500  | -4.07505700 |
| H | 4.13576900 | 7.49505500  | -2.45491000 |
| N | 2.00505000 | 2.92364800  | 1.26921300  |
| H | 1.50079500 | 2.36654800  | 1.95991000  |
| C | 3.18109800 | -0.89464700 | -1.77201700 |
| H | 2.22113300 | -1.41063100 | -1.89048400 |
| H | 3.62642200 | -0.75443200 | -2.75862100 |
| H | 3.82696900 | -1.54416200 | -1.17385800 |

### TS5a

|   |             |             |             |
|---|-------------|-------------|-------------|
| C | -2.48097900 | 0.60630500  | -0.56397200 |
| C | -3.98982900 | -0.87958900 | -1.08148700 |
| C | -1.72688000 | -1.83764100 | -0.78452000 |
| H | -0.86110500 | -1.56911000 | -1.40008300 |
| N | -4.64782200 | 0.23313900  | -0.94250400 |
| N | -3.69838500 | 1.14659900  | -0.59873100 |
| N | -2.66504700 | -0.70973300 | -0.80357000 |
| C | -4.49157900 | -2.20278600 | -1.56347800 |
| H | -4.40496300 | -2.19099200 | -2.65845700 |
| H | -5.52860200 | -2.35238000 | -1.26242800 |
| C | -2.34816600 | -3.11030200 | -1.40020200 |
| O | -3.70839100 | -3.23681300 | -1.00561100 |
| C | -1.21656200 | -3.66795000 | 0.63389200  |
| C | -1.36207600 | -2.27637200 | 0.61526400  |
| C | -1.18375700 | -1.51761100 | 1.75970600  |
| C | -0.79821900 | -2.19794800 | 2.91016500  |
| C | -0.58870700 | -3.57112600 | 2.94921900  |
| C | -0.81581700 | -4.31920200 | 1.79522100  |
| C | -1.56329000 | -4.23999200 | -0.72110300 |
| H | -1.32512500 | -0.44156700 | 1.79433100  |
| H | -0.28216300 | -4.03715000 | 3.87772400  |
| H | -0.69728600 | -5.39731600 | 1.81575500  |
| H | -2.15896300 | -5.15402200 | -0.66739800 |
| H | -0.65356200 | -4.45850700 | -1.29157400 |
| C | -4.11948700 | 2.49474700  | -0.32664300 |
| C | -4.05984200 | 2.96054200  | 0.99187600  |
| C | -4.63746100 | 3.24144400  | -1.38433800 |
| C | -4.53271500 | 4.24622500  | 1.23270900  |
| C | -5.09316400 | 4.52795300  | -1.08526600 |

|   |             |             |             |
|---|-------------|-------------|-------------|
| C | -5.04911000 | 5.04422700  | 0.20746300  |
| H | -4.49616100 | 4.63712800  | 2.24697600  |
| H | -5.49156300 | 5.13869200  | -1.89172500 |
| C | -4.71144300 | 2.68770200  | -2.78229700 |
| H | -5.59121500 | 2.04362700  | -2.88604400 |
| H | -3.82526400 | 2.08694100  | -3.02217600 |
| H | -4.80635300 | 3.50474600  | -3.50088000 |
| C | -3.48358800 | 2.12707200  | 2.10611600  |
| H | -2.38865600 | 2.17723500  | 2.09443100  |
| H | -3.77534500 | 1.07550700  | 2.02180600  |
| H | -3.82631300 | 2.49689500  | 3.07402400  |
| H | -2.26596100 | -3.06739200 | -2.48978700 |
| C | -5.55498300 | 6.43120200  | 0.50999200  |
| H | -4.79409400 | 7.01885500  | 1.03128400  |
| H | -5.82958700 | 6.96076800  | -0.40434200 |
| H | -6.43648300 | 6.39194000  | 1.15736000  |
| N | -0.63347600 | -1.42371400 | 4.14230000  |
| O | 0.03853700  | -1.91105600 | 5.03656200  |
| O | -1.18066400 | -0.33770200 | 4.20619800  |
| C | 1.01953800  | 2.35623600  | 3.49714000  |
| C | 0.99016600  | 2.42481700  | 2.10575400  |
| C | 1.46474800  | 1.36673100  | 1.32413400  |
| C | 1.97473700  | 0.23717800  | 1.97537100  |
| C | 2.01408300  | 0.17064000  | 3.36627300  |
| C | 1.53091200  | 1.22798800  | 4.13322800  |
| H | 0.63994300  | 3.18682700  | 4.08445700  |
| H | 0.57494500  | 3.29802900  | 1.61033000  |
| H | 2.34554500  | -0.60649900 | 1.40063800  |
| H | 2.40998400  | -0.71723500 | 3.85044400  |
| H | 1.54334600  | 1.16581300  | 5.21669800  |
| C | 1.30217000  | 1.42580000  | -0.18516500 |
| H | 1.14994000  | 2.47682700  | -0.45800400 |
| C | 0.05179400  | 0.66430000  | -0.60809600 |
| C | -1.18663100 | 1.39846900  | -0.40026200 |
| O | -1.30037500 | 2.59279000  | -0.17564400 |
| H | 0.02467700  | -0.30260600 | -0.10732300 |
| C | 2.95800500  | -0.49661600 | -0.93988900 |
| C | 2.52411600  | 0.94775800  | -0.99678000 |
| C | 3.81313500  | 1.65377200  | -0.61169300 |
| N | 4.75472100  | 0.64081200  | -0.45677700 |
| H | 2.29566500  | 1.16703600  | -2.05018600 |
| N | 4.20536000  | -0.62194000 | -0.67313300 |
| C | 6.12407000  | 0.72220900  | -0.14212900 |
| C | 6.75141600  | 1.95568600  | 0.08232300  |

|   |             |             |             |
|---|-------------|-------------|-------------|
| C | 6.87684500  | -0.45914800 | -0.05533500 |
| C | 8.11042700  | 1.99057800  | 0.38340300  |
| H | 6.17289800  | 2.86561100  | 0.02031700  |
| C | 8.23115100  | -0.39917400 | 0.24738000  |
| H | 6.39279700  | -1.41090000 | -0.22771600 |
| C | 8.86218800  | 0.82321700  | 0.46933200  |
| H | 8.58171900  | 2.95400800  | 0.55312900  |
| H | 8.79705100  | -1.32382000 | 0.30868200  |
| H | 9.92035400  | 0.86289900  | 0.70523300  |
| N | 4.03553200  | 2.89788200  | -0.44015200 |
| H | 3.17391600  | 3.41560700  | -0.61568800 |
| C | 2.10845100  | -1.69039200 | -1.23581800 |
| H | 1.45389400  | -1.49666600 | -2.09276500 |
| H | 2.74814800  | -2.55368400 | -1.42635600 |
| H | 1.46254400  | -1.92706600 | -0.37922000 |
| C | -1.52003100 | -0.08937900 | -3.27173300 |
| O | -1.91769200 | 1.10372000  | -3.03246700 |
| O | -0.23880800 | -0.36053800 | -3.01664000 |
| H | 0.00807100  | 0.32360700  | -1.83151400 |
| O | -2.28688900 | -1.02583600 | -3.64955700 |

**TS6R**

|   |             |             |             |
|---|-------------|-------------|-------------|
| C | -1.47278600 | 0.43857700  | -0.77734900 |
| C | -2.75798000 | 0.10680500  | -2.49874400 |
| C | -2.97457400 | -1.60509800 | -0.72228800 |
| H | -2.26621800 | -2.01489600 | -0.00059700 |
| N | -2.08853900 | 1.18805900  | -2.78838800 |
| N | -1.28916200 | 1.37962400  | -1.69688000 |
| N | -2.41276700 | -0.37262000 | -1.26627800 |
| C | -3.65686500 | -0.76592800 | -3.31365600 |
| H | -3.60840700 | -0.48844300 | -4.36585500 |
| H | -4.69657300 | -0.69271500 | -2.96701600 |
| C | -3.20598600 | -2.64257600 | -1.87545700 |
| O | -3.13641900 | -2.07640000 | -3.17937100 |
| C | -5.25877400 | -2.30317700 | -0.62256800 |
| C | -4.34285200 | -1.37469300 | -0.12828400 |
| C | -4.70325600 | -0.40645600 | 0.79640500  |
| C | -6.03470500 | -0.39847700 | 1.19358200  |
| C | -6.97948900 | -1.30640600 | 0.71951600  |
| C | -6.58573000 | -2.27344900 | -0.19770200 |
| C | -4.59503900 | -3.25500000 | -1.58329500 |
| H | -3.98301400 | 0.29674100  | 1.20218600  |
| H | -8.00113400 | -1.24239100 | 1.07186800  |
| H | -7.30710100 | -2.98859200 | -0.57818000 |

|   |             |             |             |
|---|-------------|-------------|-------------|
| H | -5.15479700 | -3.39316500 | -2.51270900 |
| H | -4.48177200 | -4.23964700 | -1.11848100 |
| C | -0.35079900 | 2.46713400  | -1.58538000 |
| C | -0.60698300 | 3.45309700  | -0.62857400 |
| C | 0.83143500  | 2.40034100  | -2.32993200 |
| C | 0.38041200  | 4.41579900  | -0.42933200 |
| C | 1.78012600  | 3.39388600  | -2.09476400 |
| C | 1.57692000  | 4.39835400  | -1.14570900 |
| H | 0.22191000  | 5.17955100  | 0.32694200  |
| H | 2.71671700  | 3.35900400  | -2.64587400 |
| C | 1.13856700  | 1.25059100  | -3.25376800 |
| H | 1.84544600  | 1.56676900  | -4.02313700 |
| H | 0.24593800  | 0.85763100  | -3.74245900 |
| H | 1.61532500  | 0.43832800  | -2.68909400 |
| C | -1.87132500 | 3.45379200  | 0.19131000  |
| H | -1.82195000 | 2.70600200  | 0.99112600  |
| H | -2.74977600 | 3.23209100  | -0.42188900 |
| H | -2.01488300 | 4.42869800  | 0.65976400  |
| H | -2.40364400 | -3.37957000 | -1.83670600 |
| C | 2.62786500  | 5.45036900  | -0.91130500 |
| H | 2.55971600  | 6.23897600  | -1.66788400 |
| H | 2.50629800  | 5.90858600  | 0.07264300  |
| H | 3.63012500  | 5.01866600  | -0.97031400 |
| N | -6.46761400 | 0.61796000  | 2.15941500  |
| O | -7.62437100 | 0.58499800  | 2.54367700  |
| O | -5.64854000 | 1.44326100  | 2.52371100  |
| C | 2.98504100  | 3.72520800  | 2.04849800  |
| C | 2.87733400  | 2.37067000  | 1.73246900  |
| C | 1.72121200  | 1.65567700  | 2.05284200  |
| C | 0.67505600  | 2.32976900  | 2.69678900  |
| C | 0.78057400  | 3.68124300  | 3.01233800  |
| C | 1.94008300  | 4.38623700  | 2.68871200  |
| H | 3.89288900  | 4.26487200  | 1.79378500  |
| H | 3.69415100  | 1.86217200  | 1.22852900  |
| H | -0.22875200 | 1.77797200  | 2.94665000  |
| H | -0.03977000 | 4.18365500  | 3.51746000  |
| H | 2.02822500  | 5.44009900  | 2.93699400  |
| C | 1.53233300  | 0.19048200  | 1.65339200  |
| H | 0.97926200  | -0.29735800 | 2.46820600  |
| C | 0.62380600  | 0.15658200  | 0.42878400  |
| C | -0.77973000 | 0.27293600  | 0.56389700  |
| O | -1.52892100 | 0.07353900  | 1.52564900  |
| H | 1.02050100  | 0.67345200  | -0.44103900 |
| C | 3.36856400  | -1.56367700 | 2.26390700  |

|   |             |             |             |
|---|-------------|-------------|-------------|
| C | 2.78919800  | -0.60105600 | 1.41134700  |
| C | 3.63080200  | -0.54664000 | 0.25758100  |
| N | 4.59981800  | -1.53669800 | 0.50850500  |
| H | 0.49316100  | -1.08492400 | -0.11641200 |
| N | 4.43732700  | -2.14179700 | 1.74798000  |
| C | 5.68541300  | -1.93273100 | -0.27939400 |
| C | 5.88241800  | -1.44314200 | -1.58189800 |
| C | 6.60723200  | -2.86026700 | 0.24046600  |
| C | 6.97905400  | -1.87033600 | -2.32530600 |
| H | 5.17155600  | -0.73083800 | -1.97604500 |
| C | 7.69261800  | -3.27413800 | -0.52071200 |
| H | 6.45039500  | -3.24437200 | 1.23946200  |
| C | 7.89449200  | -2.78422600 | -1.81047300 |
| H | 7.11293200  | -1.47710800 | -3.32946100 |
| H | 8.39058900  | -3.99073400 | -0.09664300 |
| H | 8.74596200  | -3.10893200 | -2.39982100 |
| N | 3.64547300  | 0.21232500  | -0.82579600 |
| H | 2.92852400  | 0.92681200  | -0.70699300 |
| C | 2.86947300  | -1.98484000 | 3.61318300  |
| H | 1.86873600  | -2.42428500 | 3.54164100  |
| H | 3.54510600  | -2.72783300 | 4.04068400  |
| H | 2.80716100  | -1.13095200 | 4.29517900  |
| C | -0.02652300 | -3.11406600 | 0.20717100  |
| O | 0.13523700  | -2.17293100 | -0.66855400 |
| O | 0.89319100  | -3.15902800 | 1.20312400  |
| H | 1.59128900  | -2.49246000 | 1.04502200  |
| O | -0.94113600 | -3.92978600 | 0.21523700  |

**TS6R'**

|   |             |             |             |
|---|-------------|-------------|-------------|
| C | 1.15660300  | -1.03138300 | 0.64270900  |
| C | 0.36566400  | -2.22438500 | 2.28718100  |
| C | -1.20536700 | -0.51381500 | 1.41017500  |
| H | -1.04328000 | 0.47180600  | 0.96343700  |
| N | 1.56568900  | -2.68975200 | 2.08489000  |
| N | 2.03896100  | -1.93653900 | 1.04119900  |
| N | 0.08361500  | -1.20566500 | 1.42283100  |
| C | -0.66302500 | -2.48439600 | 3.34144000  |
| H | -0.22823100 | -3.03087300 | 4.17771100  |
| H | -1.50355000 | -3.05931400 | 2.92980100  |
| C | -1.75673800 | -0.38955200 | 2.87093400  |
| O | -1.06774200 | -1.21049100 | 3.81132800  |
| C | -3.40897900 | -1.43443000 | 1.43575900  |
| C | -2.25897600 | -1.29398300 | 0.66256000  |
| C | -2.18552800 | -1.76160300 | -0.64220000 |

|   |             |             |             |
|---|-------------|-------------|-------------|
| C | -3.31756900 | -2.40837600 | -1.12057300 |
| C | -4.47849000 | -2.58578100 | -0.36964300 |
| C | -4.52806900 | -2.08827800 | 0.92457600  |
| C | -3.25517200 | -0.73947500 | 2.76082500  |
| H | -1.32244600 | -1.58915200 | -1.27754100 |
| H | -5.33031800 | -3.07870200 | -0.82018700 |
| H | -5.43313900 | -2.18711700 | 1.51437500  |
| H | -3.57801300 | -1.33719000 | 3.61810100  |
| H | -3.84546200 | 0.18329600  | 2.74625800  |
| C | 3.37847400  | -2.10017200 | 0.54066100  |
| C | 3.57186700  | -2.90700700 | -0.57687000 |
| C | 4.40391800  | -1.41222800 | 1.19436200  |
| C | 4.87924000  | -3.03053400 | -1.04651000 |
| C | 5.68838800  | -1.56786700 | 0.68538300  |
| C | 5.94081300  | -2.36859900 | -0.43224900 |
| H | 5.06579400  | -3.64297200 | -1.92486500 |
| H | 6.50866200  | -1.03100500 | 1.15484300  |
| C | 4.11207200  | -0.50764800 | 2.36016700  |
| H | 3.51928100  | -1.01501500 | 3.12663200  |
| H | 3.55678300  | 0.37223500  | 2.01748400  |
| H | 5.04118500  | -0.15907700 | 2.81326000  |
| C | 2.40598100  | -3.56017600 | -1.26744100 |
| H | 1.76388100  | -2.79346800 | -1.71538700 |
| H | 1.79839700  | -4.13810000 | -0.56406800 |
| H | 2.75168600  | -4.22930600 | -2.05649900 |
| H | -1.60802500 | 0.62888700  | 3.23135300  |
| C | 7.34660400  | -2.49541600 | -0.95886900 |
| H | 7.96893100  | -3.08077300 | -0.27487700 |
| H | 7.36392400  | -2.98495200 | -1.93466800 |
| H | 7.81016900  | -1.50927600 | -1.05588500 |
| N | -3.31827600 | -2.86564200 | -2.50949600 |
| O | -4.36418100 | -3.29748000 | -2.97137600 |
| O | -2.27790100 | -2.78948000 | -3.13998800 |
| C | 2.76842400  | 5.43389600  | 0.32294000  |
| C | 2.33704400  | 4.11530500  | 0.16153500  |
| C | 1.21744900  | 3.81988800  | -0.61671200 |
| C | 0.54584000  | 4.88172800  | -1.23799300 |
| C | 0.97537000  | 6.19395000  | -1.08622500 |
| C | 2.09144400  | 6.47790700  | -0.29640800 |
| H | 3.63953700  | 5.64100000  | 0.93781800  |
| H | 2.88689700  | 3.31523600  | 0.64500400  |
| H | -0.33859300 | 4.65997900  | -1.83006100 |
| H | 0.43842300  | 6.99900500  | -1.57933000 |
| H | 2.42699400  | 7.50253800  | -0.16913600 |

|   |             |             |             |
|---|-------------|-------------|-------------|
| C | 0.66795300  | 2.40926400  | -0.79818400 |
| H | 0.73285800  | 2.17822300  | -1.87181500 |
| C | 1.47337300  | 1.32328300  | -0.06459600 |
| C | 1.17622700  | -0.00563400 | -0.49105100 |
| O | 0.87091700  | -0.44492300 | -1.59521700 |
| H | 1.39251900  | 1.41712800  | 1.02584900  |
| C | -1.39216800 | 2.78376800  | 0.77964400  |
| C | -0.79141700 | 2.33623500  | -0.40823300 |
| C | -1.80400700 | 1.60682800  | -1.11169300 |
| N | -2.93155300 | 1.70885500  | -0.26763600 |
| H | 2.86140600  | 1.37201600  | -0.25068400 |
| N | -2.66283700 | 2.41516100  | 0.90171700  |
| C | -4.22110600 | 1.20866600  | -0.45791200 |
| C | -4.60317500 | 0.54565200  | -1.63771400 |
| C | -5.17937800 | 1.37751700  | 0.56029100  |
| C | -5.89814400 | 0.05160500  | -1.76767300 |
| H | -3.86187900 | 0.41725300  | -2.41542800 |
| C | -6.46482100 | 0.87224000  | 0.41013100  |
| H | -4.89509100 | 1.92140100  | 1.45187500  |
| C | -6.83929100 | 0.19835900  | -0.75183300 |
| H | -6.16515400 | -0.47198800 | -2.68230100 |
| H | -7.18434800 | 1.01462000  | 1.21203100  |
| H | -7.84421300 | -0.19595100 | -0.86463100 |
| N | -1.81838200 | 0.93835200  | -2.24389600 |
| H | -0.85860400 | 0.91657200  | -2.58886400 |
| C | -0.76737800 | 3.58560600  | 1.88303900  |
| H | -1.47439900 | 3.68218400  | 2.71058800  |
| H | 0.14964800  | 3.11456700  | 2.25376600  |
| H | -0.48802500 | 4.58575900  | 1.53588700  |
| C | 4.54957300  | 0.72337700  | -1.23126700 |
| O | 3.91460300  | -0.01275700 | -1.97541000 |
| O | 5.90700400  | 0.82341500  | -1.35909400 |
| H | 6.13704900  | 0.21198200  | -2.07207000 |
| O | 4.09816200  | 1.47655500  | -0.29125800 |

**TS6S**

|   |             |            |             |
|---|-------------|------------|-------------|
| C | -0.93592200 | 1.42553900 | -0.66075800 |
| C | -0.67653600 | 1.90889800 | -2.76941700 |
| C | 1.45820600  | 1.48444400 | -1.59836000 |
| H | 1.75006800  | 1.68524500 | -0.54869300 |
| N | -1.95923900 | 2.00128400 | -2.56446600 |
| N | -2.10060700 | 1.69114000 | -1.24535700 |
| N | -0.00917800 | 1.55447500 | -1.62704600 |
| C | 0.16213200  | 2.29755000 | -3.94215000 |

|   |             |             |             |
|---|-------------|-------------|-------------|
| H | -0.43647500 | 2.83831400  | -4.67401100 |
| H | 0.60922000  | 1.41459400  | -4.41786000 |
| C | 2.07719700  | 2.58387500  | -2.53768700 |
| O | 1.14168800  | 3.18114200  | -3.42873500 |
| C | 2.98853200  | 0.40603900  | -3.09398400 |
| C | 1.99288300  | 0.18029500  | -2.14087400 |
| C | 1.64564600  | -1.10833300 | -1.76760700 |
| C | 2.31657500  | -2.15162700 | -2.39014800 |
| C | 3.31077800  | -1.96019200 | -3.34525300 |
| C | 3.64910300  | -0.66009800 | -3.70076900 |
| C | 3.22708500  | 1.87631700  | -3.28761900 |
| H | 0.90918900  | -1.32042400 | -1.00494100 |
| H | 3.79906400  | -2.81843800 | -3.78910100 |
| H | 4.42347500  | -0.48044900 | -4.43913700 |
| H | 3.23920900  | 2.17999800  | -4.33881300 |
| H | 4.19230500  | 2.15210600  | -2.84743700 |
| C | -3.38582900 | 1.68606600  | -0.59395600 |
| C | -4.09417900 | 0.48576200  | -0.53466200 |
| C | -3.82689000 | 2.88091400  | -0.02077900 |
| C | -5.29741700 | 0.50043200  | 0.16585200  |
| C | -5.03484700 | 2.83885800  | 0.66908100  |
| C | -5.76525700 | 1.65500300  | 0.79412500  |
| H | -5.85554700 | -0.42622700 | 0.26852700  |
| H | -5.39744300 | 3.74461600  | 1.14794200  |
| C | -3.00138900 | 4.13499800  | -0.11579400 |
| H | -2.75086400 | 4.37031300  | -1.15455700 |
| H | -2.06610200 | 4.00407900  | 0.43795400  |
| H | -3.54169200 | 4.98166700  | 0.30979700  |
| C | -3.55470700 | -0.77710100 | -1.14811100 |
| H | -2.82768700 | -1.23441900 | -0.46911300 |
| H | -3.07101300 | -0.58981300 | -2.11051800 |
| H | -4.35996500 | -1.49758900 | -1.30020700 |
| H | 2.44548200  | 3.41087200  | -1.92879900 |
| C | -6.99196300 | 1.59114100  | 1.66046500  |
| H | -7.77679600 | 0.98788900  | 1.19684900  |
| H | -6.71127400 | 1.11039000  | 2.60361200  |
| H | -7.39004800 | 2.58597300  | 1.87083500  |
| N | 1.95808000  | -3.51972300 | -2.01397400 |
| O | 2.68839200  | -4.42506600 | -2.38017200 |
| O | 0.94034500  | -3.68450300 | -1.36103700 |
| C | -0.95027500 | -3.98872700 | 3.43997400  |
| C | -0.76934500 | -2.82475200 | 2.69217300  |
| C | 0.07183500  | -1.81076700 | 3.14778800  |
| C | 0.72005200  | -1.98292500 | 4.37621000  |

|   |             |             |             |
|---|-------------|-------------|-------------|
| C | 0.53949900  | -3.13842800 | 5.12756600  |
| C | -0.29685100 | -4.15166000 | 4.65708900  |
| H | -1.60672300 | -4.76867400 | 3.06655600  |
| H | -1.29583300 | -2.70824000 | 1.75061500  |
| H | 1.38744600  | -1.20087800 | 4.73069800  |
| H | 1.05072700  | -3.25108600 | 6.07885700  |
| H | -0.43937200 | -5.05732000 | 5.23827700  |
| C | 0.38089300  | -0.55836600 | 2.34545800  |
| H | 0.27462500  | 0.29557400  | 3.03185300  |
| C | -0.60002300 | -0.27925700 | 1.17570300  |
| C | -0.80584600 | 1.09165600  | 0.82313300  |
| O | -1.08673800 | 2.02112500  | 1.59397000  |
| H | -0.41561600 | -0.92376400 | 0.31578400  |
| C | 2.60997200  | -1.63637600 | 1.36410100  |
| C | 1.78638500  | -0.57659900 | 1.81016800  |
| C | 2.41389400  | 0.60729700  | 1.35636900  |
| N | 3.56917000  | 0.16899900  | 0.69690200  |
| H | -1.82969100 | -0.52339900 | 1.60189700  |
| N | 3.67761800  | -1.20772200 | 0.70711600  |
| C | 4.51355700  | 0.91497700  | -0.01800900 |
| C | 4.57284400  | 2.31859000  | 0.05730000  |
| C | 5.43738200  | 0.24105900  | -0.83687700 |
| C | 5.54059900  | 3.01207700  | -0.66729100 |
| H | 3.85967500  | 2.83531500  | 0.68467900  |
| C | 6.39007400  | 0.95252700  | -1.55448800 |
| H | 5.38327400  | -0.83806700 | -0.89940800 |
| C | 6.45545600  | 2.34483400  | -1.47820400 |
| H | 5.57432300  | 4.09507200  | -0.58909800 |
| H | 7.09000600  | 0.40909800  | -2.18280900 |
| H | 7.20367200  | 2.89509200  | -2.03915700 |
| N | 2.04195300  | 1.88255400  | 1.38032200  |
| H | 1.19637300  | 1.95453800  | 1.94223300  |
| C | 2.43057500  | -3.11735900 | 1.52470600  |
| H | 1.49697600  | -3.45621100 | 1.06746400  |
| H | 3.26336700  | -3.63123500 | 1.03759300  |
| H | 2.39543300  | -3.40751400 | 2.57947300  |
| C | -3.79750800 | -0.14103100 | 2.73516100  |
| O | -3.35999500 | 1.11098000  | 3.04555900  |
| O | -4.89314800 | -0.47597900 | 3.17416200  |
| H | -2.51089500 | 1.31315100  | 2.61586400  |
| O | -3.02808200 | -0.87660500 | 2.00793700  |

**TS6S'**

|   |             |            |            |
|---|-------------|------------|------------|
| C | -1.27119300 | 0.47856400 | 0.86159500 |
|---|-------------|------------|------------|

|   |             |             |             |
|---|-------------|-------------|-------------|
| C | -2.72654500 | -0.08192500 | 2.38687800  |
| C | -3.72104000 | 0.36772300  | 0.17806800  |
| H | -3.43355400 | 1.06186300  | -0.60968800 |
| N | -1.58157000 | -0.08667300 | 3.00771800  |
| N | -0.68264000 | 0.25227900  | 2.03785400  |
| N | -2.57587900 | 0.24721000  | 1.07469100  |
| C | -4.12191500 | -0.22622500 | 2.89506200  |
| H | -4.14100500 | -0.15917900 | 3.98212800  |
| H | -4.55668300 | -1.18616800 | 2.58418200  |
| C | -4.98387800 | 0.88410400  | 0.95923300  |
| O | -4.84127700 | 0.87589300  | 2.37242500  |
| C | -5.49302700 | -1.20431800 | -0.17435600 |
| C | -4.12960100 | -0.98337200 | -0.36290500 |
| C | -3.31105500 | -1.92820200 | -0.96811800 |
| C | -3.92342100 | -3.10985500 | -1.36588300 |
| C | -5.28262900 | -3.36464000 | -1.19401100 |
| C | -6.07873300 | -2.39786100 | -0.59308800 |
| C | -6.14717700 | -0.02262300 | 0.49130500  |
| H | -2.25222600 | -1.75340300 | -1.13092500 |
| H | -5.69215400 | -4.30917700 | -1.52865600 |
| H | -7.13859000 | -2.57787400 | -0.44742300 |
| H | -6.77407500 | -0.30246700 | 1.34308800  |
| H | -6.78534700 | 0.51067100  | -0.22048600 |
| C | 0.72594400  | 0.28139700  | 2.33574200  |
| C | 1.47795900  | -0.86460100 | 2.06642200  |
| C | 1.26451600  | 1.47384700  | 2.81910800  |
| C | 2.85493300  | -0.76440500 | 2.24862600  |
| C | 2.64908600  | 1.52236600  | 2.97590700  |
| C | 3.45515400  | 0.42184900  | 2.67293900  |
| H | 3.47756000  | -1.62252200 | 2.00695400  |
| H | 3.10798400  | 2.44620900  | 3.32011300  |
| C | 0.38010500  | 2.66378900  | 3.08414900  |
| H | -0.34883300 | 2.44380100  | 3.87046800  |
| H | -0.19047900 | 2.94167800  | 2.18907400  |
| H | 0.97624400  | 3.52300300  | 3.39571400  |
| C | 0.83129600  | -2.12929100 | 1.57628900  |
| H | 0.57435000  | -2.04090900 | 0.50967100  |
| H | -0.07621000 | -2.35586600 | 2.14548800  |
| H | 1.52397700  | -2.96799600 | 1.67380400  |
| H | -5.14913500 | 1.93204900  | 0.71172400  |
| C | 4.95466800  | 0.49425300  | 2.77428400  |
| H | 5.32799900  | -0.15998900 | 3.56872600  |
| H | 5.38670800  | 0.15762800  | 1.82651400  |
| H | 5.29526400  | 1.51170700  | 2.98047900  |

|   |             |             |             |
|---|-------------|-------------|-------------|
| N | -3.09787900 | -4.14759900 | -1.99826800 |
| O | -3.64674600 | -5.18450300 | -2.33468400 |
| O | -1.91200300 | -3.91957500 | -2.15018100 |
| C | 2.81721800  | 5.17272800  | -1.62609400 |
| C | 2.11982800  | 4.02667800  | -1.24207200 |
| C | 2.07831500  | 2.90439000  | -2.06953600 |
| C | 2.74415400  | 2.96296000  | -3.29944000 |
| C | 3.43805700  | 4.10259800  | -3.68938700 |
| C | 3.48136800  | 5.21534200  | -2.84740700 |
| H | 2.84038300  | 6.03424700  | -0.96527700 |
| H | 1.60478400  | 4.01050700  | -0.28604500 |
| H | 2.72918300  | 2.08571400  | -3.94189400 |
| H | 3.94850400  | 4.12489500  | -4.64780400 |
| H | 4.02549900  | 6.10635100  | -3.14524400 |
| C | 1.41387500  | 1.60053200  | -1.66371100 |
| H | 0.82931400  | 1.25566800  | -2.53030500 |
| C | 0.42960200  | 1.72524400  | -0.49241100 |
| C | -0.69597900 | 0.86629700  | -0.49009400 |
| O | -1.37907200 | 0.48660600  | -1.45764000 |
| H | 0.94264700  | 1.79912400  | 0.46217800  |
| C | 3.73567500  | 0.63282800  | -0.79407900 |
| C | 2.43895300  | 0.54341500  | -1.33580400 |
| C | 2.11531300  | -0.84422500 | -1.33874900 |
| N | 3.27141600  | -1.46756300 | -0.83430200 |
| H | -0.32755100 | 2.91282300  | -0.58404400 |
| N | 4.25757500  | -0.55107300 | -0.50232400 |
| C | 3.51036300  | -2.81712600 | -0.58117200 |
| C | 2.60028600  | -3.82479700 | -0.95158400 |
| C | 4.70158000  | -3.19132300 | 0.07037800  |
| C | 2.88679300  | -5.15609200 | -0.66481800 |
| H | 1.68229100  | -3.53148100 | -1.44375800 |
| C | 4.96537700  | -4.52758900 | 0.34567100  |
| H | 5.40402800  | -2.41584400 | 0.34752000  |
| C | 4.06348000  | -5.52635800 | -0.01650300 |
| H | 2.16969500  | -5.91788800 | -0.95926300 |
| H | 5.89117900  | -4.78786800 | 0.85159300  |
| H | 4.27318500  | -6.56862100 | 0.20152900  |
| N | 1.02791000  | -1.50569300 | -1.68874100 |
| H | 0.34696200  | -0.82623900 | -2.02313000 |
| C | 4.55885700  | 1.85009000  | -0.48643400 |
| H | 4.10548300  | 2.42736800  | 0.32831000  |
| H | 5.55878600  | 1.53688000  | -0.17566700 |
| H | 4.64373000  | 2.51908800  | -1.34748900 |
| C | -2.03204100 | 3.92107800  | -0.01848100 |

|   |             |            |             |
|---|-------------|------------|-------------|
| O | -2.43782500 | 3.00001700 | 0.69650500  |
| O | -2.77944000 | 5.04492400 | -0.15797700 |
| H | -3.56773200 | 4.91123800 | 0.38586400  |
| O | -0.94168000 | 3.97508000 | -0.68520100 |

**M6R**

|   |             |             |             |
|---|-------------|-------------|-------------|
| C | 0.54339300  | -0.03260300 | -0.97285200 |
| C | 1.74909800  | 1.67136200  | -1.62468400 |
| C | 1.56728900  | 1.44405700  | 0.83387800  |
| H | 0.76282100  | 1.04624600  | 1.45871500  |
| N | 1.32850700  | 1.13224100  | -2.72832300 |
| N | 0.61106300  | 0.03698200  | -2.30469600 |
| N | 1.33363800  | 0.96907300  | -0.52635300 |
| C | 2.41209300  | 2.98251600  | -1.36289500 |
| H | 2.42460400  | 3.59186000  | -2.26531600 |
| H | 3.43999400  | 2.84553600  | -1.00093300 |
| C | 1.58542800  | 3.02079600  | 0.88003000  |
| O | 1.59253700  | 3.62874600  | -0.40191300 |
| C | 3.63885500  | 2.13112000  | 1.82957400  |
| C | 2.93346700  | 1.03483800  | 1.33522100  |
| C | 3.48345000  | -0.23853400 | 1.32017500  |
| C | 4.77176600  | -0.36571100 | 1.82244000  |
| C | 5.50307800  | 0.70520900  | 2.33121700  |
| C | 4.92826800  | 1.96986900  | 2.33510800  |
| C | 2.82601500  | 3.39308500  | 1.72445000  |
| H | 2.93871200  | -1.09678500 | 0.94474000  |
| H | 6.50369500  | 0.53617200  | 2.70838700  |
| H | 5.48327300  | 2.81908100  | 2.71933900  |
| H | 3.37304000  | 4.21679900  | 1.25594500  |
| H | 2.51172300  | 3.73379200  | 2.71673000  |
| C | 0.07524400  | -0.89812700 | -3.25144000 |
| C | 0.73637500  | -2.11479400 | -3.42254200 |
| C | -1.08800400 | -0.54641600 | -3.94449200 |
| C | 0.18298500  | -3.01833000 | -4.33154500 |
| C | -1.59663400 | -1.48132700 | -4.84097000 |
| C | -0.97736500 | -2.71900600 | -5.04437000 |
| H | 0.67437500  | -3.97519700 | -4.48607100 |
| H | -2.50321300 | -1.24141300 | -5.39100700 |
| C | -1.75956900 | 0.77628300  | -3.69365400 |
| H | -1.12004500 | 1.60333500  | -4.01779800 |
| H | -1.95317800 | 0.90917700  | -2.62170900 |
| H | -2.70251000 | 0.83443300  | -4.23948400 |
| C | 1.98876600  | -2.44250400 | -2.65078200 |
| H | 1.76687800  | -2.68234600 | -1.60417300 |

|   |             |             |             |
|---|-------------|-------------|-------------|
| H | 2.68974800  | -1.60254300 | -2.65537400 |
| H | 2.48739900  | -3.30951500 | -3.08610100 |
| H | 0.66846400  | 3.38111700  | 1.34408600  |
| C | -1.56497000 | -3.70528600 | -6.01971100 |
| H | -0.95679400 | -4.60922400 | -6.08493400 |
| H | -2.57544200 | -3.99357700 | -5.71584200 |
| H | -1.63801000 | -3.26657100 | -7.01889500 |
| N | 5.39404100  | -1.69500200 | 1.81186900  |
| O | 6.50873600  | -1.80782900 | 2.29168400  |
| O | 4.76354500  | -2.61448400 | 1.31957800  |
| C | -5.56799500 | -2.15848600 | -1.23104800 |
| C | -4.35767700 | -1.70842900 | -0.71632800 |
| C | -3.56672800 | -2.54691800 | 0.07784200  |
| C | -4.01577700 | -3.83806900 | 0.34991200  |
| C | -5.23305900 | -4.29117700 | -0.16043200 |
| C | -6.01045900 | -3.45324500 | -0.95320500 |
| H | -6.17326300 | -1.49937700 | -1.84593600 |
| H | -4.01187500 | -0.69552800 | -0.91654400 |
| H | -3.40927800 | -4.49289700 | 0.97114700  |
| H | -5.57180100 | -5.29778500 | 0.06483000  |
| H | -6.95799900 | -3.80281800 | -1.35074900 |
| C | -2.24105600 | -2.04765700 | 0.62904800  |
| H | -1.84593500 | -2.82653900 | 1.29343800  |
| C | -1.23607700 | -1.88881800 | -0.55037400 |
| C | -0.02910400 | -1.10899000 | -0.10730100 |
| O | 0.51702100  | -1.29967600 | 0.96683000  |
| H | -1.71563100 | -1.39159600 | -1.39256500 |
| C | -2.70365400 | -0.65945700 | 2.79608600  |
| C | -2.36889600 | -0.78607400 | 1.43134000  |
| C | -2.01555500 | 0.50040400  | 1.00844000  |
| N | -2.17469300 | 1.30013500  | 2.13554800  |
| H | -0.91245400 | -2.88550600 | -0.87568300 |
| N | -2.58715300 | 0.58358000  | 3.23500000  |
| C | -1.76250100 | 2.63499500  | 2.28751100  |
| C | -2.02164200 | 3.58109000  | 1.28930000  |
| C | -1.07265900 | 3.01480000  | 3.44512900  |
| C | -1.55461900 | 4.88580000  | 1.43398200  |
| H | -2.59936200 | 3.29367400  | 0.41704100  |
| C | -0.62950500 | 4.32537600  | 3.58699300  |
| H | -0.89861300 | 2.27031900  | 4.21355700  |
| C | -0.85453300 | 5.26318100  | 2.57790100  |
| H | -1.75152500 | 5.61182400  | 0.65188900  |
| H | -0.09422500 | 4.61317000  | 4.48648600  |
| H | -0.49517600 | 6.28071600  | 2.68777300  |

|   |             |             |             |
|---|-------------|-------------|-------------|
| N | -1.53088200 | 0.85525700  | -0.19959400 |
| H | -1.17358300 | 1.81174900  | -0.17385100 |
| C | -3.15628900 | -1.75608200 | 3.70716600  |
| H | -3.36328700 | -1.35875600 | 4.70234700  |
| H | -4.06135800 | -2.23605000 | 3.32154500  |
| H | -2.38884300 | -2.53260900 | 3.79577500  |

**M6R'**

|   |             |             |             |
|---|-------------|-------------|-------------|
| C | 0.30464700  | -0.76884500 | -0.12333300 |
| C | -0.03138800 | -1.73976600 | 1.80026000  |
| C | -2.01880400 | -1.80070600 | 0.34113700  |
| H | -2.44492600 | -1.09362700 | -0.38378300 |
| N | 1.22357400  | -1.39421900 | 1.81975000  |
| N | 1.42107300  | -0.80039500 | 0.61177800  |
| N | -0.63463400 | -1.37731100 | 0.63040800  |
| C | -0.87585300 | -2.38438300 | 2.84889100  |
| H | -0.41322300 | -2.26590200 | 3.82831000  |
| H | -0.99659300 | -3.45631400 | 2.63742200  |
| C | -2.87425900 | -1.83090700 | 1.66529100  |
| O | -2.10577000 | -1.69492200 | 2.85143600  |
| C | -2.93474300 | -4.00616400 | 0.58937600  |
| C | -2.02213400 | -3.23908200 | -0.13608200 |
| C | -1.23470600 | -3.80463600 | -1.12870400 |
| C | -1.40001100 | -5.16332100 | -1.36339800 |
| C | -2.31056500 | -5.95409100 | -0.66736000 |
| C | -3.08873500 | -5.36530800 | 0.32173200  |
| C | -3.64599600 | -3.16907400 | 1.61597900  |
| H | -0.52598100 | -3.22802600 | -1.71006300 |
| H | -2.38968000 | -7.00839100 | -0.90042300 |
| H | -3.79631000 | -5.96358200 | 0.88571000  |
| H | -3.67208300 | -3.63249900 | 2.60664400  |
| H | -4.68287100 | -2.99164300 | 1.31220300  |
| C | 2.73641400  | -0.37066900 | 0.23003400  |
| C | 3.37179200  | -1.03058900 | -0.82500400 |
| C | 3.30616400  | 0.69521400  | 0.93569400  |
| C | 4.61410000  | -0.53545100 | -1.22224100 |
| C | 4.54555300  | 1.14949800  | 0.49254300  |
| C | 5.20422300  | 0.55887900  | -0.59075100 |
| H | 5.13163200  | -1.02393100 | -2.04334000 |
| H | 5.01086000  | 1.98590400  | 1.00813600  |
| C | 2.62299200  | 1.30267200  | 2.13217900  |
| H | 2.75080800  | 0.65835500  | 3.00698900  |
| H | 1.54732300  | 1.42695000  | 1.96941800  |
| H | 3.05382900  | 2.27967900  | 2.35671200  |

|   |             |             |             |
|---|-------------|-------------|-------------|
| C | 2.75909000  | -2.22159900 | -1.51860900 |
| H | 2.06993500  | -1.92263300 | -2.31668900 |
| H | 2.21041100  | -2.86017600 | -0.82030600 |
| H | 3.54125700  | -2.82407900 | -1.98285200 |
| H | -3.55114900 | -0.97916200 | 1.68598700  |
| C | 6.53113900  | 1.09955000  | -1.05396000 |
| H | 7.22789900  | 1.19306600  | -0.21689500 |
| H | 6.98152800  | 0.45235600  | -1.80838200 |
| H | 6.40752300  | 2.09573100  | -1.48927300 |
| N | -0.56320300 | -5.79420500 | -2.39097800 |
| O | -0.75174100 | -6.97303000 | -2.63568300 |
| O | 0.27934600  | -5.10571100 | -2.94116100 |
| C | 2.51718200  | 4.52138400  | -3.59729400 |
| C | 1.97898100  | 3.30419900  | -3.17499100 |
| C | 0.62375700  | 3.19534000  | -2.86528000 |
| C | -0.18655400 | 4.32949400  | -2.99688000 |
| C | 0.34507600  | 5.54092900  | -3.42004900 |
| C | 1.70484900  | 5.64241100  | -3.71977100 |
| H | 3.57586300  | 4.58784400  | -3.82842400 |
| H | 2.63514000  | 2.44315600  | -3.08360300 |
| H | -1.24138500 | 4.25300200  | -2.74395500 |
| H | -0.29907500 | 6.40993300  | -3.51230700 |
| H | 2.12328900  | 6.58916500  | -4.04598500 |
| C | -0.01324900 | 1.90769600  | -2.37334500 |
| H | -0.76461200 | 1.60787400  | -3.11749000 |
| C | 0.95980600  | 0.73458300  | -2.20635200 |
| C | 0.10947100  | -0.34044700 | -1.55244500 |
| O | -0.77745700 | -0.91890400 | -2.15465100 |
| H | 1.78573200  | 1.03664500  | -1.55873900 |
| C | -0.24186500 | 2.66499500  | 0.13670400  |
| C | -0.71617200 | 2.04316500  | -1.04323000 |
| C | -2.01126600 | 1.52964400  | -0.73052200 |
| N | -2.16393400 | 1.84562100  | 0.62858000  |
| H | 1.36635500  | 0.34641600  | -3.14831600 |
| N | -1.08406000 | 2.53565200  | 1.14448800  |
| C | -3.22680200 | 1.51407200  | 1.47978700  |
| C | -4.51317300 | 1.26136600  | 0.97993500  |
| C | -2.99122100 | 1.41864100  | 2.85830500  |
| C | -5.52949400 | 0.88611100  | 1.85468100  |
| H | -4.68362900 | 1.33115200  | -0.08542700 |
| C | -4.01903300 | 1.04595300  | 3.71591600  |
| H | -1.99428900 | 1.61803300  | 3.23139200  |
| C | -5.29303600 | 0.76738200  | 3.22285400  |
| H | -6.51970000 | 0.68654700  | 1.45563000  |

|   |             |            |             |
|---|-------------|------------|-------------|
| H | -3.81685800 | 0.96035900 | 4.77928600  |
| H | -6.09001800 | 0.46771900 | 3.89535100  |
| N | -2.90588700 | 0.84566300 | -1.41171900 |
| H | -2.54561900 | 0.71305100 | -2.35588300 |
| C | 1.00328400  | 3.48379600 | 0.30057500  |
| H | 1.12714200  | 3.76163400 | 1.34923400  |
| H | 1.89801600  | 2.94427000 | -0.03121900 |
| H | 0.94215000  | 4.39563300 | -0.30240500 |

## M6S

|   |             |             |             |
|---|-------------|-------------|-------------|
| C | 1.06848900  | -0.54688200 | 0.11335600  |
| C | 0.95775200  | -0.71681000 | -2.07817500 |
| C | -0.69866000 | 0.84655200  | -1.21797700 |
| H | -1.28538000 | 0.95377300  | -0.30492900 |
| N | 1.96268700  | -1.46198300 | -1.74511100 |
| N | 2.05710400  | -1.31354000 | -0.38390500 |
| N | 0.38325300  | -0.11482900 | -0.98583200 |
| C | 0.31130500  | -0.51020100 | -3.40965600 |
| H | 0.61357200  | -1.30379900 | -4.09301000 |
| H | 0.60218700  | 0.45915000  | -3.83697600 |
| C | -1.66320000 | 0.36287100  | -2.36050500 |
| O | -1.08467200 | -0.61233400 | -3.21387700 |
| C | -0.93099700 | 2.63101600  | -2.79395800 |
| C | -0.16146900 | 2.16998200  | -1.72379200 |
| C | 0.94365200  | 2.87272700  | -1.27061200 |
| C | 1.23448100  | 4.06753800  | -1.91992800 |
| C | 0.47651200  | 4.56586800  | -2.97476600 |
| C | -0.62045900 | 3.83479600  | -3.41941600 |
| C | -2.03503900 | 1.65887700  | -3.11303100 |
| H | 1.58006000  | 2.52698500  | -0.46344400 |
| H | 0.76108400  | 5.50122700  | -3.43997000 |
| H | -1.21238100 | 4.19452000  | -4.25408200 |
| H | -2.14604100 | 1.46468300  | -4.18292700 |
| H | -2.99369100 | 2.03977400  | -2.74421500 |
| C | 3.20224800  | -1.89704000 | 0.26892600  |
| C | 4.31549200  | -1.07719600 | 0.47842000  |
| C | 3.18964900  | -3.25572300 | 0.57571000  |
| C | 5.44815600  | -1.66232000 | 1.03484600  |
| C | 4.35253500  | -3.79651700 | 1.12803900  |
| C | 5.48340600  | -3.01918000 | 1.36843900  |
| H | 6.32694900  | -1.04601500 | 1.20882800  |
| H | 4.36983400  | -4.85558800 | 1.37300600  |
| C | 1.97125900  | -4.11228700 | 0.36129000  |
| H | 1.45469700  | -3.85941200 | -0.56959700 |

|   |             |             |             |
|---|-------------|-------------|-------------|
| H | 1.26769300  | -3.97835900 | 1.18946900  |
| H | 2.24764100  | -5.16723900 | 0.32127400  |
| C | 4.27317400  | 0.38912700  | 0.14264200  |
| H | 3.66741600  | 0.92805600  | 0.87976200  |
| H | 3.83773700  | 0.56497100  | -0.84626700 |
| H | 5.27661100  | 0.81704500  | 0.15566600  |
| H | -2.53901200 | -0.12034000 | -1.92724600 |
| C | 6.71580300  | -3.62012600 | 1.99280800  |
| H | 6.73630500  | -4.70423300 | 1.86385800  |
| H | 7.62460700  | -3.20083400 | 1.55438000  |
| H | 6.74238500  | -3.41075800 | 3.06695400  |
| N | 2.41115400  | 4.82624200  | -1.47804300 |
| O | 2.63895600  | 5.89175600  | -2.02216000 |
| O | 3.09690900  | 4.34542200  | -0.59226400 |
| C | -2.63733500 | 3.82441000  | 3.83044000  |
| C | -1.88694800 | 2.88172900  | 3.12743200  |
| C | -1.97877800 | 1.52462800  | 3.43706200  |
| C | -2.82756200 | 1.13152100  | 4.47710500  |
| C | -3.57794500 | 2.06750800  | 5.17999800  |
| C | -3.48751300 | 3.42087300  | 4.85477900  |
| H | -2.55531200 | 4.87602500  | 3.57386700  |
| H | -1.23381600 | 3.21865900  | 2.32737000  |
| H | -2.90469800 | 0.07513700  | 4.72269600  |
| H | -4.23193800 | 1.74270500  | 5.98319600  |
| H | -4.07144200 | 4.15453300  | 5.40111700  |
| C | -1.25146600 | 0.44717800  | 2.65628100  |
| H | -0.91676300 | -0.31943200 | 3.37057000  |
| C | 0.06123400  | 0.97560800  | 2.00075900  |
| C | 1.02618300  | -0.10346700 | 1.55579700  |
| O | 1.89592300  | -0.51176200 | 2.29937300  |
| H | -0.17037400 | 1.66409100  | 1.18389100  |
| C | -3.37879900 | 0.08411900  | 1.05369200  |
| C | -2.13333300 | -0.22019500 | 1.64784600  |
| C | -1.66472200 | -1.36575700 | 0.98619900  |
| N | -2.63421500 | -1.66403500 | 0.04310700  |
| H | 0.62105600  | 1.53743000  | 2.75447200  |
| N | -3.69770500 | -0.79606700 | 0.10867900  |
| C | -2.70833600 | -2.78372000 | -0.81256000 |
| C | -1.57428600 | -3.24016700 | -1.48947300 |
| C | -3.93544000 | -3.42515100 | -1.00135000 |
| C | -1.66132100 | -4.35532400 | -2.31748000 |
| H | -0.63683300 | -2.70203400 | -1.40053500 |
| C | -4.01577400 | -4.52550800 | -1.84696900 |
| H | -4.80768600 | -3.04649800 | -0.48156100 |

|   |             |             |             |
|---|-------------|-------------|-------------|
| C | -2.87964000 | -5.00410900 | -2.49853900 |
| H | -0.77325800 | -4.70201700 | -2.83663600 |
| H | -4.97217400 | -5.01842500 | -1.98928000 |
| H | -2.94579000 | -5.86916100 | -3.14972300 |
| N | -0.48569900 | -1.94814800 | 1.23439800  |
| H | -0.32371500 | -2.74058300 | 0.61733600  |
| C | -4.32170300 | 1.21857200  | 1.32339500  |
| H | -3.85280900 | 2.18386800  | 1.11044200  |
| H | -5.20482600 | 1.10814800  | 0.69115700  |
| H | -4.63147400 | 1.24168300  | 2.37180300  |

**M6S'**

|   |             |             |             |
|---|-------------|-------------|-------------|
| C | -1.24607600 | 0.73914100  | 0.84670700  |
| C | -2.64106400 | -0.06895800 | 2.32186200  |
| C | -3.67502600 | 0.24244200  | 0.12517900  |
| H | -3.52113700 | 0.92108600  | -0.71080000 |
| N | -1.49936700 | 0.00711200  | 2.94481500  |
| N | -0.63980000 | 0.50334300  | 2.01759300  |
| N | -2.53054300 | 0.36886200  | 1.03462300  |
| C | -4.00344500 | -0.44297300 | 2.80796300  |
| H | -4.04075800 | -0.39191100 | 3.89552600  |
| H | -4.26675600 | -1.45922400 | 2.48609800  |
| C | -5.01241300 | 0.56621100  | 0.87827300  |
| O | -4.88871300 | 0.53311000  | 2.29214800  |
| C | -5.16605600 | -1.59106700 | -0.20746900 |
| C | -3.83297900 | -1.19506300 | -0.32932300 |
| C | -2.84411500 | -2.06155300 | -0.78084000 |
| C | -3.27040100 | -3.34286700 | -1.11882600 |
| C | -4.59449500 | -3.76329400 | -1.03564700 |
| C | -5.55712100 | -2.87657500 | -0.56981500 |
| C | -6.01591100 | -0.47873700 | 0.34637500  |
| H | -1.79128500 | -1.78754500 | -0.87137000 |
| H | -4.84697300 | -4.77779400 | -1.31703200 |
| H | -6.59068200 | -3.19156400 | -0.47557400 |
| H | -6.68549900 | -0.80503500 | 1.14677400  |
| H | -6.63503400 | -0.04018900 | -0.44302300 |
| C | 0.77556600  | 0.50602800  | 2.30241200  |
| C | 1.46397600  | -0.68636100 | 2.05690600  |
| C | 1.36448800  | 1.66148400  | 2.81451100  |
| C | 2.84178900  | -0.65722600 | 2.24858600  |
| C | 2.74993800  | 1.63770000  | 2.97487600  |
| C | 3.50017200  | 0.49862200  | 2.67110700  |
| H | 3.41719500  | -1.55137900 | 2.02164300  |
| H | 3.25198700  | 2.53054100  | 3.33923600  |

|   |             |             |             |
|---|-------------|-------------|-------------|
| C | 0.54060300  | 2.88049800  | 3.13658900  |
| H | -0.29763100 | 2.62580300  | 3.79156500  |
| H | 0.12027500  | 3.33674900  | 2.23235700  |
| H | 1.15233800  | 3.63265100  | 3.63636700  |
| C | 0.74377600  | -1.93398100 | 1.62862900  |
| H | 0.35772900  | -1.83315900 | 0.60418900  |
| H | -0.08992200 | -2.15303900 | 2.30360600  |
| H | 1.42882000  | -2.78343800 | 1.63772300  |
| H | -5.32908900 | 1.58516200  | 0.65674600  |
| C | 4.99893900  | 0.48905500  | 2.79994900  |
| H | 5.31126700  | -0.07103900 | 3.68716900  |
| H | 5.43450800  | 0.00117100  | 1.92327000  |
| H | 5.40158300  | 1.50136500  | 2.87744300  |
| N | -2.27098600 | -4.32466100 | -1.56068700 |
| O | -2.67353200 | -5.35438300 | -2.07536800 |
| O | -1.09844500 | -4.05738300 | -1.37711200 |
| C | 3.35179800  | 5.19339900  | -1.71030600 |
| C | 2.53895400  | 4.15667000  | -1.25046500 |
| C | 2.27317700  | 3.04905200  | -2.05566100 |
| C | 2.83439500  | 3.00490800  | -3.33637300 |
| C | 3.64167900  | 4.03647400  | -3.80021900 |
| C | 3.90597400  | 5.13760200  | -2.98436500 |
| H | 3.55426300  | 6.04326000  | -1.06575200 |
| H | 2.13525600  | 4.21260300  | -0.24304600 |
| H | 2.64022200  | 2.13901300  | -3.96445100 |
| H | 4.06637600  | 3.98246500  | -4.79780200 |
| H | 4.53853900  | 5.94385100  | -3.34155800 |
| C | 1.45467000  | 1.85513200  | -1.59355400 |
| H | 0.79520400  | 1.58108400  | -2.43145200 |
| C | 0.48831800  | 2.24513400  | -0.42163500 |
| C | -0.76395700 | 1.42883700  | -0.40877400 |
| O | -1.50139600 | 1.36069000  | -1.37693500 |
| H | 1.02970300  | 2.21509700  | 0.51983600  |
| C | 3.64637700  | 0.60565400  | -0.78318100 |
| C | 2.31612200  | 0.68376500  | -1.25334100 |
| C | 1.83237900  | -0.65217200 | -1.27277700 |
| N | 2.91725600  | -1.41823100 | -0.83265800 |
| H | 0.13061800  | 3.26821800  | -0.59416800 |
| N | 4.01668700  | -0.63957800 | -0.53778800 |
| C | 3.02188800  | -2.80716600 | -0.66676100 |
| C | 2.00319700  | -3.67941700 | -1.08016400 |
| C | 4.17242300  | -3.33917700 | -0.06135600 |
| C | 2.13837700  | -5.04807100 | -0.87101600 |
| H | 1.11158700  | -3.26871000 | -1.53209400 |

|   |            |             |             |
|---|------------|-------------|-------------|
| C | 4.28861000 | -4.71119700 | 0.13379700  |
| H | 4.96196800 | -2.66420500 | 0.24348400  |
| C | 3.27441100 | -5.57974800 | -0.26478800 |
| H | 1.32980800 | -5.69980800 | -1.19005900 |
| H | 5.18635900 | -5.10228200 | 0.60398500  |
| H | 3.36946900 | -6.64901300 | -0.10557700 |
| N | 0.64855000 | -1.16580900 | -1.58906900 |
| H | 0.08676200 | -0.41218800 | -1.98594200 |
| C | 4.63722300 | 1.69924600  | -0.51525800 |
| H | 4.29035800 | 2.35546600  | 0.29153200  |
| H | 5.58569500 | 1.24992200  | -0.21215900 |
| H | 4.80485600 | 2.32700500  | -1.39526200 |

**TS5<sup>N</sup>**

|   |             |             |             |
|---|-------------|-------------|-------------|
| C | -2.30542600 | 0.10389700  | -0.80306700 |
| C | -3.90972900 | -1.38046200 | -0.88785700 |
| C | -1.67796900 | -2.32191900 | -1.28523600 |
| H | -0.72478400 | -1.94001900 | -1.66158000 |
| N | -4.51072700 | -0.26117200 | -0.60616800 |
| N | -3.49224600 | 0.64830900  | -0.54724900 |
| N | -2.55741500 | -1.19813200 | -1.00709400 |
| C | -4.42280700 | -2.73935400 | -1.24201700 |
| H | -5.48775800 | -2.69611100 | -1.46766300 |
| H | -4.25861300 | -3.44738700 | -0.41944100 |
| C | -2.33143100 | -3.26428700 | -2.34616800 |
| O | -3.74648400 | -3.12767800 | -2.42675800 |
| C | -1.58929600 | -4.55503600 | -0.44144700 |
| C | -1.48360700 | -3.21154000 | -0.07741600 |
| C | -1.21414500 | -2.83188600 | 1.22682500  |
| C | -1.02310500 | -3.85357200 | 2.14939700  |
| C | -1.11169200 | -5.20263700 | 1.82018700  |
| C | -1.40277900 | -5.55812500 | 0.50671300  |
| C | -1.90563900 | -4.68189100 | -1.90959700 |
| H | -1.15916100 | -1.79628100 | 1.54348400  |
| H | -0.95874100 | -5.94918500 | 2.58920100  |
| H | -1.48687700 | -6.60432700 | 0.23297200  |
| H | -2.69660800 | -5.40508900 | -2.12332700 |
| H | -1.01175500 | -4.99028500 | -2.46239900 |
| C | -3.70883300 | 2.02307700  | -0.18566400 |
| C | -3.47498900 | 2.39786500  | 1.13842600  |
| C | -4.09557300 | 2.91631700  | -1.18653300 |
| C | -3.65886900 | 3.74373100  | 1.45722800  |
| C | -4.26981200 | 4.24694900  | -0.81498000 |
| C | -4.05781700 | 4.67555200  | 0.49808800  |

|   |             |             |             |
|---|-------------|-------------|-------------|
| H | -3.48494100 | 4.06845200  | 2.48019400  |
| H | -4.56559500 | 4.96904200  | -1.57191200 |
| C | -4.26075000 | 2.44570300  | -2.60457300 |
| H | -5.01308700 | 1.65446300  | -2.67590500 |
| H | -3.30480800 | 2.04352800  | -2.95652400 |
| H | -4.56195100 | 3.27041300  | -3.25195400 |
| C | -3.00790200 | 1.40543600  | 2.16949100  |
| H | -1.94243100 | 1.18888300  | 2.02928200  |
| H | -3.55961100 | 0.46301100  | 2.10212600  |
| H | -3.13704200 | 1.81029800  | 3.17444400  |
| H | -1.96481900 | -3.00778700 | -3.34054000 |
| C | -4.27639300 | 6.11788400  | 0.87303500  |
| H | -3.69982200 | 6.38762500  | 1.76031400  |
| H | -3.98929900 | 6.78392800  | 0.05615400  |
| H | -5.33295900 | 6.30177000  | 1.09298300  |
| N | -0.70968200 | -3.48387300 | 3.53407100  |
| O | -0.60871400 | -4.37837500 | 4.35394200  |
| O | -0.56270900 | -2.29975300 | 3.78396100  |
| C | 0.17365800  | 3.84820600  | 2.74918200  |
| C | 0.21350400  | 3.14042000  | 1.55449200  |
| C | 1.25369700  | 2.24095100  | 1.28233000  |
| C | 2.25258000  | 2.06751000  | 2.23883400  |
| C | 2.21401100  | 2.77537500  | 3.44235200  |
| C | 1.17842700  | 3.66659900  | 3.70175800  |
| H | -0.63989500 | 4.54310500  | 2.93756100  |
| H | -0.57687800 | 3.27265200  | 0.81659900  |
| H | 3.06974800  | 1.37681400  | 2.04700500  |
| H | 2.99935000  | 2.62718400  | 4.17721800  |
| H | 1.15160900  | 4.21707800  | 4.63682300  |
| C | 1.21310200  | 1.47279800  | -0.03792900 |
| H | 1.09828500  | 2.21201900  | -0.84405900 |
| C | -0.05855700 | 0.66235200  | -0.07649100 |
| C | -1.03099300 | 0.87616000  | -0.99460800 |
| O | -1.05465200 | 1.62586900  | -2.04905000 |
| H | -0.25762600 | -0.01151600 | 0.75152900  |
| C | 2.85242400  | -0.59871400 | 0.22002300  |
| C | 2.46181500  | 0.66838100  | -0.36180600 |
| C | 3.73734400  | 1.35999400  | -0.58375600 |
| N | 4.70899200  | 0.38604700  | -0.29786700 |
| H | 2.10914000  | 0.37789200  | -1.69756900 |
| N | 4.14111300  | -0.79040100 | 0.19855000  |
| C | 6.09923900  | 0.42140200  | -0.48578200 |
| C | 6.74554700  | 1.54736300  | -1.02135900 |
| C | 6.86159900  | -0.71370100 | -0.15664500 |

|    |             |             |             |
|----|-------------|-------------|-------------|
| C  | 8.12389400  | 1.52020200  | -1.21943600 |
| H  | 6.15950800  | 2.42167900  | -1.26559800 |
| C  | 8.23621500  | -0.71582900 | -0.36311900 |
| H  | 6.36516800  | -1.57660200 | 0.26729200  |
| C  | 8.88166500  | 0.39796000  | -0.89694700 |
| H  | 8.60774100  | 2.40032900  | -1.63260800 |
| H  | 8.80650300  | -1.60093500 | -0.09750200 |
| H  | 9.95496700  | 0.39151100  | -1.05420400 |
| N  | 4.01046400  | 2.54824300  | -1.01033400 |
| H  | 3.13013400  | 3.04929900  | -1.13105500 |
| C  | 1.95416300  | -1.68594100 | 0.71581800  |
| H  | 1.22072000  | -1.93754800 | -0.05653900 |
| H  | 2.54358600  | -2.57163600 | 0.96128500  |
| H  | 1.41107700  | -1.36883200 | 1.61343800  |
| C  | 0.87787100  | -0.65773700 | -2.96878400 |
| O  | 1.64045800  | 0.38544700  | -2.80210600 |
| O  | -0.35362700 | -0.40360600 | -3.41882700 |
| H  | -0.60375500 | 0.53128900  | -3.09791100 |
| O  | 1.22466800  | -1.82061200 | -2.74035300 |
| Cs | 4.31751600  | -1.35445000 | -3.08264800 |

**M5<sup>N</sup>**

|   |            |             |             |
|---|------------|-------------|-------------|
| C | 2.66148300 | 0.28820100  | -0.80895300 |
| C | 3.96407100 | 2.03262600  | -0.94089700 |
| C | 1.58227800 | 2.60099400  | -0.77419300 |
| H | 0.63655300 | 2.11047700  | -1.03263800 |
| N | 4.77325600 | 1.01145400  | -0.96446700 |
| N | 3.94372400 | -0.06480700 | -0.86949700 |
| N | 2.66120500 | 1.62736300  | -0.83805600 |
| C | 4.18298500 | 3.49571900  | -1.16094400 |
| H | 5.17412200 | 3.67063900  | -1.57792300 |
| H | 4.08511600 | 4.05264300  | -0.22032000 |
| C | 1.85638100 | 3.77156900  | -1.77075300 |
| O | 3.22872200 | 3.89927900  | -2.12839300 |
| C | 1.34349100 | 4.65423400  | 0.42191900  |
| C | 1.51785600 | 3.27794700  | 0.57566600  |
| C | 1.59512200 | 2.68952700  | 1.82644000  |
| C | 1.45515300 | 3.53084200  | 2.92340800  |
| C | 1.26756500 | 4.90487100  | 2.80832800  |
| C | 1.21517800 | 5.47503100  | 1.53977700  |
| C | 1.32472900 | 5.02312100  | -1.03979300 |
| H | 1.76688500 | 1.62853100  | 1.97352600  |
| H | 1.17103700 | 5.50460000  | 3.70452400  |
| H | 1.08232000 | 6.54601300  | 1.43076900  |

|   |             |             |             |
|---|-------------|-------------|-------------|
| H | 1.93830100  | 5.89627400  | -1.27564000 |
| H | 0.30041900  | 5.23786500  | -1.36274700 |
| C | 4.43303500  | -1.41562200 | -0.79271100 |
| C | 4.48685100  | -2.02617400 | 0.46125500  |
| C | 4.78883800  | -2.05507900 | -1.98355000 |
| C | 4.93459100  | -3.34768700 | 0.50078700  |
| C | 5.22386800  | -3.37321100 | -1.88725400 |
| C | 5.30316900  | -4.03246900 | -0.65654400 |
| H | 4.99200900  | -3.85049500 | 1.46299400  |
| H | 5.50111300  | -3.90201700 | -2.79554500 |
| C | 4.66966200  | -1.34431200 | -3.30336600 |
| H | 5.28714700  | -0.44169700 | -3.32547200 |
| H | 3.63027400  | -1.04559900 | -3.47262700 |
| H | 4.98111900  | -1.99714300 | -4.11966500 |
| C | 4.04892800  | -1.32077000 | 1.71693200  |
| H | 2.96395900  | -1.41435900 | 1.84324600  |
| H | 4.30259400  | -0.25706400 | 1.70184300  |
| H | 4.52146800  | -1.77292000 | 2.59031200  |
| H | 1.33512900  | 3.57927500  | -2.70876100 |
| C | 5.80115900  | -5.45186900 | -0.58451700 |
| H | 5.45547500  | -5.94691700 | 0.32548800  |
| H | 5.46136400  | -6.03121800 | -1.44605400 |
| H | 6.89559200  | -5.47481100 | -0.58224900 |
| N | 1.50519400  | 2.93360800  | 4.26240000  |
| O | 1.45460600  | 3.68096200  | 5.22204000  |
| O | 1.59049600  | 1.71974600  | 4.33677200  |
| C | 1.78893200  | -4.63840700 | 1.71075400  |
| C | 1.28873600  | -3.64835600 | 0.87317300  |
| C | 0.11374000  | -2.95910000 | 1.20006500  |
| C | -0.55138000 | -3.28140200 | 2.38053500  |
| C | -0.05080500 | -4.27572300 | 3.22290300  |
| C | 1.11828000  | -4.95508200 | 2.89290100  |
| H | 2.69973800  | -5.16399900 | 1.43805800  |
| H | 1.81489600  | -3.40064400 | -0.04855400 |
| H | -1.46637100 | -2.75203600 | 2.63112600  |
| H | -0.57907600 | -4.51953500 | 4.13957800  |
| H | 1.50426000  | -5.72903400 | 3.54881400  |
| C | -0.37444000 | -1.86193400 | 0.24356600  |
| H | -0.40294400 | -2.31576100 | -0.75772400 |
| C | 0.71262600  | -0.82121800 | 0.19102000  |
| C | 1.53065800  | -0.66484400 | -0.85269600 |
| O | 1.47627500  | -1.34646200 | -2.02476200 |
| H | 0.90872800  | -0.24694000 | 1.09276800  |
| C | -2.17277900 | -0.10611400 | 1.14501000  |

|    |             |             |             |
|----|-------------|-------------|-------------|
| C  | -1.73921400 | -1.29834200 | 0.52872300  |
| C  | -2.93009100 | -2.03855700 | 0.22002800  |
| N  | -3.96943100 | -1.19329900 | 0.65268700  |
| H  | -1.74383400 | -0.64495600 | -1.45948900 |
| N  | -3.49108800 | -0.01612300 | 1.22309800  |
| C  | -5.35426000 | -1.37323400 | 0.56852400  |
| C  | -5.92519200 | -2.45349700 | -0.12645600 |
| C  | -6.20316500 | -0.42025500 | 1.16213600  |
| C  | -7.31087200 | -2.56123700 | -0.21499600 |
| H  | -5.26769900 | -3.18671100 | -0.57269300 |
| C  | -7.58330200 | -0.54799500 | 1.05706500  |
| H  | -5.76109500 | 0.40325100  | 1.70786400  |
| C  | -8.15280100 | -1.61737000 | 0.36745900  |
| H  | -7.73450100 | -3.40379200 | -0.75414200 |
| H  | -8.21821800 | 0.19672700  | 1.52831300  |
| H  | -9.23063800 | -1.71461100 | 0.29052100  |
| N  | -3.12806400 | -3.20537900 | -0.34113500 |
| H  | -2.21294700 | -3.62198200 | -0.51341300 |
| C  | -1.35947100 | 1.04474400  | 1.65511400  |
| H  | -0.79863700 | 1.49850800  | 0.83179700  |
| H  | -2.02529500 | 1.79940900  | 2.07976400  |
| H  | -0.65239200 | 0.73628200  | 2.43322600  |
| C  | -0.71272900 | 0.68314200  | -2.36018200 |
| O  | -1.31654100 | -0.55354700 | -2.33644300 |
| O  | 0.35954400  | 0.72708400  | -3.02304700 |
| H  | 1.03868400  | -0.68633600 | -2.66093700 |
| O  | -1.25655700 | 1.60693200  | -1.72267300 |
| Cs | -4.29897700 | 1.15713100  | -1.67536800 |

**TS6<sup>N</sup>**

|   |             |            |             |
|---|-------------|------------|-------------|
| C | -0.91056700 | 1.50968600 | -0.71449500 |
| C | -0.76159100 | 2.06194300 | -2.81555700 |
| C | 1.44610100  | 1.73508500 | -1.72545700 |
| H | 1.75142100  | 1.96850800 | -0.68752200 |
| N | -2.03777800 | 2.07841600 | -2.56015900 |
| N | -2.11080900 | 1.72491000 | -1.24842500 |
| N | -0.02842900 | 1.71604800 | -1.71040900 |
| C | -0.00879300 | 2.52477600 | -4.01733400 |
| H | -0.67102600 | 3.06342200 | -4.69411100 |
| H | 0.44448200  | 1.67774100 | -4.55027500 |
| C | 1.98127600  | 2.79936600 | -2.75960500 |
| O | 0.96482000  | 3.42590100 | -3.52754200 |
| C | 2.94494600  | 0.61618800 | -3.23548500 |
| C | 2.05290600  | 0.43238500 | -2.18011200 |

|   |             |             |             |
|---|-------------|-------------|-------------|
| C | 1.89728200  | -0.80726200 | -1.58150500 |
| C | 2.66693100  | -1.84637500 | -2.07546700 |
| C | 3.55946800  | -1.70466800 | -3.13460300 |
| C | 3.68994500  | -0.45518700 | -3.72839900 |
| C | 3.01039400  | 2.05909100  | -3.64974800 |
| H | 1.28025100  | -0.96556400 | -0.70592700 |
| H | 4.14113100  | -2.55754400 | -3.46334400 |
| H | 4.38883900  | -0.31175900 | -4.54581700 |
| H | 2.77471200  | 2.21144400  | -4.70864700 |
| H | 4.01665700  | 2.45247800  | -3.47732100 |
| C | -3.36819800 | 1.68494200  | -0.54545300 |
| C | -4.05766000 | 0.47555700  | -0.46261300 |
| C | -3.81723800 | 2.87595600  | 0.03316100  |
| C | -5.24880400 | 0.47843700  | 0.26153200  |
| C | -5.00972000 | 2.82125700  | 0.74708400  |
| C | -5.72353900 | 1.62905400  | 0.89031600  |
| H | -5.80268500 | -0.45209200 | 0.36093900  |
| H | -5.37704500 | 3.72559700  | 1.22496000  |
| C | -3.01693000 | 4.14349500  | -0.08929800 |
| H | -2.82026500 | 4.39132600  | -1.13679800 |
| H | -2.05419800 | 4.02188500  | 0.41785800  |
| H | -3.54887500 | 4.97793700  | 0.36939100  |
| C | -3.52509400 | -0.78663100 | -1.08420400 |
| H | -2.84374800 | -1.28492100 | -0.38581500 |
| H | -2.98537100 | -0.58992000 | -2.01390800 |
| H | -4.34331600 | -1.47570400 | -1.30245800 |
| H | 2.45300700  | 3.61413600  | -2.20896500 |
| C | -6.94678700 | 1.56445300  | 1.76245400  |
| H | -7.69911200 | 0.89117100  | 1.34383500  |
| H | -6.65159200 | 1.17347000  | 2.74180100  |
| H | -7.39519800 | 2.55047300  | 1.90006100  |
| N | 2.53051700  | -3.14852000 | -1.42744800 |
| O | 3.46511700  | -3.92576400 | -1.49977000 |
| O | 1.47318800  | -3.39084900 | -0.86605400 |
| C | -0.77395600 | -4.25869300 | 2.70372100  |
| C | -0.50801100 | -3.01748200 | 2.12964100  |
| C | -0.15016000 | -1.92300300 | 2.92323100  |
| C | -0.11323200 | -2.08895900 | 4.30927700  |
| C | -0.39287200 | -3.32481700 | 4.89189000  |
| C | -0.71057200 | -4.41985700 | 4.08850200  |
| H | -1.01729800 | -5.10570900 | 2.06857900  |
| H | -0.53112400 | -2.91295900 | 1.04798500  |
| H | 0.16048300  | -1.24440000 | 4.93630600  |
| H | -0.34754800 | -3.43605700 | 5.97090200  |

|    |             |             |             |
|----|-------------|-------------|-------------|
| H  | -0.90475100 | -5.38954500 | 4.53687400  |
| C  | 0.29205100  | -0.61318500 | 2.29985800  |
| H  | 0.13379600  | 0.18345700  | 3.04247400  |
| C  | -0.58415300 | -0.22591100 | 1.07424600  |
| C  | -0.74574000 | 1.14987700  | 0.75762100  |
| O  | -1.01214800 | 2.07674100  | 1.54873700  |
| H  | -0.41567600 | -0.85794800 | 0.20299100  |
| C  | 2.64351300  | -1.73731600 | 1.66144500  |
| C  | 1.74070100  | -0.66554200 | 1.88778400  |
| C  | 2.37689200  | 0.48414400  | 1.34963100  |
| N  | 3.57827900  | 0.00989400  | 0.81304500  |
| H  | -1.82375600 | -0.42172700 | 1.56755700  |
| N  | 3.73011700  | -1.34525300 | 1.01337800  |
| C  | 4.48777200  | 0.66570200  | -0.02751700 |
| C  | 4.49549100  | 2.06384600  | -0.17701000 |
| C  | 5.40924200  | -0.10089600 | -0.75812300 |
| C  | 5.39447600  | 2.66096400  | -1.05735800 |
| H  | 3.79618400  | 2.65361200  | 0.39957100  |
| C  | 6.29722400  | 0.51492300  | -1.63086600 |
| H  | 5.39431600  | -1.17674000 | -0.63992900 |
| C  | 6.29724700  | 1.89945500  | -1.79691600 |
| H  | 5.38624600  | 3.74303600  | -1.15932700 |
| H  | 6.99260700  | -0.09985200 | -2.19548700 |
| H  | 6.99217800  | 2.37425100  | -2.48206800 |
| N  | 1.99781900  | 1.75299300  | 1.26789800  |
| H  | 1.17387300  | 1.88189600  | 1.84721400  |
| C  | 2.59566700  | -3.18140400 | 2.07575600  |
| H  | 1.94278000  | -3.76847900 | 1.42622600  |
| H  | 3.60609100  | -3.59014900 | 2.00264500  |
| H  | 2.23418900  | -3.29585800 | 3.10141200  |
| C  | -3.60251800 | 0.09268800  | 2.88966800  |
| O  | -3.16862800 | 1.35381700  | 3.03342200  |
| O  | -4.63747700 | -0.23311700 | 3.47266400  |
| H  | -2.34037600 | 1.53448900  | 2.54034100  |
| O  | -2.90463300 | -0.72889900 | 2.16736100  |
| Cs | -4.05514400 | -3.21983400 | 3.55557300  |

### TS7R

|   |             |             |             |
|---|-------------|-------------|-------------|
| C | -0.37898400 | -0.65801300 | 0.84263700  |
| C | -1.95718900 | -0.27741100 | 2.30506000  |
| C | -2.21475700 | 0.98497600  | 0.18709400  |
| H | -1.47978200 | 1.38164700  | -0.51617000 |
| N | -1.16512300 | -1.12503800 | 2.89200800  |
| N | -0.19258200 | -1.36723400 | 1.95087400  |

|   |             |             |             |
|---|-------------|-------------|-------------|
| N | -1.52422600 | 0.02082700  | 1.04324000  |
| C | -3.11163400 | 0.52198900  | 2.81434200  |
| H | -3.16473200 | 0.46910200  | 3.90091700  |
| H | -4.05830400 | 0.16398100  | 2.38772600  |
| C | -2.85765300 | 2.12944500  | 1.05515000  |
| O | -2.83660200 | 1.86427900  | 2.45018300  |
| C | -4.55221500 | 1.07829800  | -0.33400200 |
| C | -3.38307300 | 0.34371600  | -0.52387000 |
| C | -3.36491100 | -0.82510400 | -1.27038600 |
| C | -4.57663000 | -1.23264000 | -1.81178800 |
| C | -5.76474400 | -0.52418900 | -1.64600200 |
| C | -5.75149900 | 0.64852100  | -0.90033600 |
| C | -4.29311900 | 2.30138400  | 0.50465700  |
| H | -2.45058100 | -1.38324100 | -1.43599900 |
| H | -6.67590200 | -0.89969000 | -2.09437000 |
| H | -6.66744500 | 1.21150800  | -0.75628600 |
| H | -5.00523700 | 2.41863400  | 1.32683600  |
| H | -4.35156200 | 3.20647000  | -0.10901800 |
| C | 0.84461400  | -2.33194900 | 2.18843600  |
| C | 0.71686500  | -3.59090400 | 1.59599700  |
| C | 1.93464300  | -1.94985800 | 2.97073400  |
| C | 1.74757300  | -4.50085500 | 1.81573100  |
| C | 2.93818800  | -2.89907100 | 3.16215300  |
| C | 2.86189500  | -4.17135800 | 2.59292300  |
| H | 1.67932900  | -5.49031300 | 1.37056800  |
| H | 3.80408000  | -2.63252500 | 3.76217700  |
| C | 2.02283300  | -0.55744800 | 3.53421900  |
| H | 1.20594200  | -0.36783900 | 4.23731200  |
| H | 1.94534200  | 0.18517400  | 2.72945000  |
| H | 2.96980300  | -0.41541900 | 4.05676600  |
| C | -0.47601400 | -3.93059100 | 0.74051700  |
| H | -0.44893900 | -3.38874200 | -0.21257000 |
| H | -1.41243100 | -3.66777300 | 1.24189700  |
| H | -0.49314000 | -4.99732000 | 0.51442100  |
| H | -2.27306200 | 3.04480200  | 0.94278400  |
| C | 3.96808200  | -5.17478600 | 2.78986800  |
| H | 3.56423800  | -6.15307700 | 3.06324000  |
| H | 4.53848500  | -5.30277400 | 1.86476500  |
| H | 4.65950800  | -4.85472200 | 3.57148000  |
| N | -4.60638500 | -2.47534800 | -2.59251700 |
| O | -5.66315600 | -2.80410500 | -3.10310400 |
| O | -3.57257300 | -3.11403800 | -2.68391300 |
| C | 6.19464100  | -0.11017400 | -0.32842300 |
| C | 4.83675600  | 0.14470500  | -0.48439900 |

|   |             |             |             |
|---|-------------|-------------|-------------|
| C | 4.09980600  | -0.49708400 | -1.48523300 |
| C | 4.75261100  | -1.39675200 | -2.32729000 |
| C | 6.11559100  | -1.65327300 | -2.17648200 |
| C | 6.83987800  | -1.01093000 | -1.17669200 |
| H | 6.75340800  | 0.39696300  | 0.45225700  |
| H | 4.32885200  | 0.85379600  | 0.16603100  |
| H | 4.18984900  | -1.89796700 | -3.11138900 |
| H | 6.61003900  | -2.35231400 | -2.84415700 |
| H | 7.90107600  | -1.20644500 | -1.05939300 |
| C | 2.60980700  | -0.23190100 | -1.62221200 |
| H | 2.28586900  | -0.64769300 | -2.58531500 |
| C | 1.85294100  | -1.01443100 | -0.50746800 |
| C | 0.41728900  | -0.53929200 | -0.42128700 |
| O | -0.24946200 | -0.36323000 | -1.44907200 |
| H | 2.35648500  | -0.89561400 | 0.45217400  |
| C | 2.34993000  | 2.18493300  | -2.64208400 |
| C | 2.24969900  | 1.22636200  | -1.60849100 |
| C | 1.50552500  | 1.84544300  | -0.61047400 |
| N | 1.21704000  | 3.10947500  | -1.08678500 |
| H | 1.85939700  | -2.08068700 | -0.76863300 |
| N | 1.73024900  | 3.31778400  | -2.34313300 |
| C | 0.29561000  | 4.01323400  | -0.52399800 |
| C | 0.33671300  | 4.30074100  | 0.84437600  |
| C | -0.68210200 | 4.59940700  | -1.33330800 |
| C | -0.61371800 | 5.15452600  | 1.40062200  |
| H | 1.12057800  | 3.86640300  | 1.45684500  |
| C | -1.61821200 | 5.45978900  | -0.76906400 |
| H | -0.68965800 | 4.36680500  | -2.39221500 |
| C | -1.59424500 | 5.73495500  | 0.59895000  |
| H | -0.57760900 | 5.37311000  | 2.46291100  |
| H | -2.37552800 | 5.91276600  | -1.40111200 |
| H | -2.32986100 | 6.40330100  | 1.03375500  |
| N | 1.05253300  | 1.26088900  | 0.52543600  |
| H | 0.31701100  | 1.82880900  | 0.94977900  |
| C | 3.06210400  | 2.01736100  | -3.94637100 |
| H | 2.64583600  | 1.17573600  | -4.51040500 |
| H | 2.96822500  | 2.92171800  | -4.55002900 |
| H | 4.12400900  | 1.80618700  | -3.78651900 |

**TS7R'**

|   |            |             |             |
|---|------------|-------------|-------------|
| C | 0.76255800 | -1.56404500 | -0.06508600 |
| C | 1.50354400 | -3.50175800 | 0.63599600  |
| C | 3.02377400 | -2.35099000 | -1.01005200 |
| H | 2.72123200 | -2.29305600 | -2.05288500 |

|   |             |             |             |
|---|-------------|-------------|-------------|
| N | 0.41870400  | -3.28703900 | 1.31862800  |
| N | -0.02406700 | -2.07514600 | 0.88443200  |
| N | 1.77678300  | -2.45222700 | -0.20076200 |
| C | 2.33791100  | -4.74583400 | 0.65475200  |
| H | 1.67767800  | -5.61239100 | 0.59382100  |
| H | 2.90425200  | -4.81605300 | 1.59055100  |
| C | 3.90745400  | -3.58972400 | -0.67835100 |
| O | 3.17228400  | -4.77478400 | -0.48050700 |
| C | 4.93248600  | -1.67555400 | 0.27775500  |
| C | 3.91996100  | -1.20812800 | -0.56842900 |
| C | 3.87012000  | 0.12911800  | -0.94140500 |
| C | 4.82854900  | 0.97250200  | -0.39460900 |
| C | 5.83283500  | 0.54058000  | 0.46584700  |
| C | 5.88956900  | -0.80771800 | 0.79767300  |
| C | 4.82408200  | -3.15902400 | 0.48696800  |
| H | 3.11787200  | 0.50265500  | -1.62462700 |
| H | 6.55160900  | 1.25260500  | 0.85147000  |
| H | 6.67325500  | -1.17609400 | 1.45081000  |
| H | 4.37637600  | -3.36456800 | 1.46548900  |
| H | 5.78809200  | -3.67056300 | 0.45656400  |
| C | -1.25117000 | -1.55719200 | 1.43629500  |
| C | -1.20048400 | -0.56719000 | 2.41486800  |
| C | -2.44627400 | -2.14306300 | 0.99492400  |
| C | -2.42499400 | -0.07265000 | 2.87981800  |
| C | -3.63160900 | -1.62047500 | 1.49319700  |
| C | -3.63992800 | -0.56944500 | 2.41867500  |
| H | -2.41609300 | 0.71098600  | 3.63414500  |
| H | -4.57545100 | -2.03020300 | 1.13773000  |
| C | -2.43041400 | -3.29609100 | 0.03307100  |
| H | -1.90305400 | -4.15355500 | 0.46144300  |
| H | -1.92224600 | -2.99071300 | -0.88611600 |
| H | -3.44953600 | -3.59662200 | -0.21287900 |
| C | 0.08424100  | -0.07018400 | 3.03230700  |
| H | 0.97458900  | -0.45823300 | 2.53342200  |
| H | 0.12826500  | -0.37942300 | 4.08058700  |
| H | 0.13456200  | 1.02241100  | 3.00992300  |
| H | 4.52360300  | -3.77361900 | -1.56109700 |
| C | -4.94763700 | -0.00258700 | 2.90373400  |
| H | -4.80535800 | 0.64231700  | 3.77331900  |
| H | -5.42114500 | 0.58815000  | 2.11325400  |
| H | -5.64501700 | -0.80088800 | 3.17223500  |
| N | 4.77177300  | 2.39601300  | -0.75109100 |
| O | 5.65943400  | 3.12299300  | -0.33995900 |
| O | 3.83647900  | 2.77349400  | -1.43565000 |

|   |             |             |             |
|---|-------------|-------------|-------------|
| C | 0.01036600  | 4.76554600  | 1.83095300  |
| C | -0.26564400 | 3.62103400  | 1.09047700  |
| C | 0.29145200  | 3.43977600  | -0.18152500 |
| C | 1.13486400  | 4.42617800  | -0.69009700 |
| C | 1.41177900  | 5.57690800  | 0.04785600  |
| C | 0.85068700  | 5.74998300  | 1.30942000  |
| H | -0.43440600 | 4.89469800  | 2.81300600  |
| H | -0.94765900 | 2.86822300  | 1.48404100  |
| H | 1.58114200  | 4.29107100  | -1.67111300 |
| H | 2.06860400  | 6.33611700  | -0.36519300 |
| H | 1.06543100  | 6.64506300  | 1.88448300  |
| C | 0.01365500  | 2.16815100  | -0.96059100 |
| H | 0.55259500  | 2.21917300  | -1.91628100 |
| C | 0.59953400  | 0.98593400  | -0.16310800 |
| C | 0.65808400  | -0.30860300 | -0.93827500 |
| O | 1.25005100  | -0.40061700 | -2.03475600 |
| H | 0.00725300  | 0.85621500  | 0.74292200  |
| C | -2.56015700 | 2.80686700  | -1.15669100 |
| C | -1.45440900 | 1.91779000  | -1.16840000 |
| C | -2.00036500 | 0.64581700  | -1.31721300 |
| N | -3.37069500 | 0.83621200  | -1.34518100 |
| H | 1.63099300  | 1.22635000  | 0.13188700  |
| N | -3.70477000 | 2.14971800  | -1.26015000 |
| C | -4.40733700 | -0.12331600 | -1.34202100 |
| C | -4.25557000 | -1.37108000 | -1.94898900 |
| C | -5.61360700 | 0.20283200  | -0.71248100 |
| C | -5.29623700 | -2.29494700 | -1.88680200 |
| H | -3.32611400 | -1.61543700 | -2.44530800 |
| C | -6.64635500 | -0.72526200 | -0.66471100 |
| H | -5.71905200 | 1.18541200  | -0.26864200 |
| C | -6.49133000 | -1.98533000 | -1.24250900 |
| H | -5.16750200 | -3.26623600 | -2.35532000 |
| H | -7.57479200 | -0.46332200 | -0.16658800 |
| H | -7.29627300 | -2.71163500 | -1.19991500 |
| N | -1.39115000 | -0.59525200 | -1.37630600 |
| H | -1.07333800 | -0.75043700 | -2.33515100 |
| C | -2.58648000 | 4.30512400  | -1.09462800 |
| H | -3.56564000 | 4.65938000  | -1.42327800 |
| H | -2.40276600 | 4.67457500  | -0.08153500 |
| H | -1.81719400 | 4.73970300  | -1.73817800 |

**TS7S**

|   |            |             |             |
|---|------------|-------------|-------------|
| C | 1.10058600 | 0.42732900  | 0.11908600  |
| C | 1.22624800 | -0.03208400 | -2.02736600 |

|   |             |             |             |
|---|-------------|-------------|-------------|
| C | -1.06126800 | -0.18192000 | -1.20491900 |
| H | -1.55342500 | -0.47729800 | -0.27780900 |
| N | 2.42280300  | 0.34445300  | -1.70390400 |
| N | 2.32712000  | 0.66466800  | -0.37361800 |
| N | 0.37178400  | 0.00674800  | -0.95351300 |
| C | 0.69814100  | -0.54447500 | -3.32872000 |
| H | 1.52064100  | -0.92225800 | -3.93636100 |
| H | 0.18665600  | 0.25650600  | -3.88085900 |
| C | -1.31596200 | -1.30069800 | -2.27900800 |
| O | -0.16164600 | -1.62558600 | -3.03639900 |
| C | -2.44866500 | 0.74907600  | -2.92126700 |
| C | -1.65275000 | 1.06759800  | -1.81989700 |
| C | -1.43261000 | 2.38091300  | -1.43704300 |
| C | -2.06313300 | 3.36564900  | -2.18760400 |
| C | -2.88474300 | 3.08375100  | -3.27471600 |
| C | -3.07737700 | 1.75712000  | -3.64822400 |
| C | -2.46229400 | -0.73915500 | -3.15248000 |
| H | -0.78844300 | 2.65865700  | -0.60933200 |
| H | -3.34372000 | 3.89876100  | -3.82014200 |
| H | -3.69431900 | 1.51876600  | -4.50784000 |
| H | -2.31434300 | -1.01405800 | -4.20034100 |
| H | -3.41870700 | -1.16589600 | -2.83193200 |
| C | 3.45448000  | 1.32980100  | 0.23160900  |
| C | 3.45077800  | 2.72703500  | 0.22878700  |
| C | 4.51682500  | 0.56830700  | 0.71015500  |
| C | 4.57551500  | 3.36982100  | 0.73687400  |
| C | 5.62323400  | 1.25944300  | 1.20576500  |
| C | 5.66888000  | 2.65261300  | 1.22968600  |
| H | 4.60033400  | 4.45667700  | 0.74721100  |
| H | 6.46946500  | 0.69034400  | 1.58248300  |
| C | 4.45892700  | -0.93458100 | 0.74011300  |
| H | 4.03256500  | -1.34347300 | -0.18115000 |
| H | 3.83978000  | -1.26655200 | 1.58036300  |
| H | 5.45674000  | -1.35639600 | 0.87025800  |
| C | 2.25607900  | 3.49834400  | -0.26529900 |
| H | 1.43001800  | 3.41381400  | 0.45074000  |
| H | 1.90443700  | 3.12873100  | -1.23432700 |
| H | 2.49442400  | 4.55754300  | -0.37172800 |
| H | -1.59721300 | -2.22985300 | -1.78207500 |
| C | 6.86122200  | 3.37567500  | 1.79995900  |
| H | 7.75197300  | 2.74428100  | 1.78504000  |
| H | 7.07365300  | 4.28964200  | 1.24017600  |
| H | 6.67330900  | 3.66284500  | 2.83954400  |
| N | -1.82495800 | 4.76827500  | -1.82637000 |

|   |             |             |             |
|---|-------------|-------------|-------------|
| O | -2.42275300 | 5.62710300  | -2.44918800 |
| O | -1.03699800 | 4.99470200  | -0.92375200 |
| C | -4.87783300 | 0.67661200  | 3.29836900  |
| C | -3.61585200 | 0.54389100  | 2.72116700  |
| C | -2.63895700 | -0.25471100 | 3.31860000  |
| C | -2.95116300 | -0.91143800 | 4.51242800  |
| C | -4.21043400 | -0.78461200 | 5.09077400  |
| C | -5.18031400 | 0.01096000  | 4.48271100  |
| H | -5.62560600 | 1.30089300  | 2.81922100  |
| H | -3.40584300 | 1.06231500  | 1.78931800  |
| H | -2.19691700 | -1.53712100 | 4.98307500  |
| H | -4.43407500 | -1.30429800 | 6.01715300  |
| H | -6.16295900 | 0.11445300  | 4.93156800  |
| C | -1.28343900 | -0.49749700 | 2.68582900  |
| H | -0.55708400 | -0.67719700 | 3.49118300  |
| C | -0.74922600 | 0.76701800  | 1.94748500  |
| C | 0.71680300  | 0.74545700  | 1.54760200  |
| O | 1.56814000  | 1.25361500  | 2.25714200  |
| H | -1.38041300 | 0.99447700  | 1.08452000  |
| C | -2.24872700 | -2.52122000 | 1.19012900  |
| C | -1.27290300 | -1.69096100 | 1.78397700  |
| C | -0.04652900 | -2.09498700 | 1.23888800  |
| N | -0.35684600 | -3.09884500 | 0.33668100  |
| H | -0.82156000 | 1.61790400  | 2.63100800  |
| N | -1.70046600 | -3.38751500 | 0.34140000  |
| C | 0.52234500  | -3.91840900 | -0.40277700 |
| C | 1.65953000  | -3.37961800 | -1.01142500 |
| C | 0.23761400  | -5.27887900 | -0.54661200 |
| C | 2.52364400  | -4.20428400 | -1.72499000 |
| H | 1.85204500  | -2.31379800 | -0.95965200 |
| C | 1.09719200  | -6.09002500 | -1.27862100 |
| H | -0.65678600 | -5.67707900 | -0.08243800 |
| C | 2.24847800  | -5.56203700 | -1.86146600 |
| H | 3.40479300  | -3.77354600 | -2.19023300 |
| H | 0.86990900  | -7.14585700 | -1.38608600 |
| H | 2.91905200  | -6.20184700 | -2.42508800 |
| N | 1.12087400  | -1.52161200 | 1.55344000  |
| H | 1.89660100  | -1.91484600 | 1.02571900  |
| C | -3.73732800 | -2.53898700 | 1.37045100  |
| H | -4.20008200 | -1.63998900 | 0.95185700  |
| H | -4.14937300 | -3.41327100 | 0.86289100  |
| H | -4.01038000 | -2.57426200 | 2.42855900  |

TS7S'

|   |             |             |             |
|---|-------------|-------------|-------------|
| C | 0.66786900  | -1.62485500 | 0.43160900  |
| C | 2.23876500  | -2.01241000 | 1.91354600  |
| C | 2.95375200  | -2.48223500 | -0.39256300 |
| H | 2.43305700  | -2.85199800 | -1.27318500 |
| N | 1.24042000  | -1.55982900 | 2.60648900  |
| N | 0.26769400  | -1.31828900 | 1.67707400  |
| N | 1.92934300  | -2.08282200 | 0.58195500  |
| C | 3.55869600  | -2.55578800 | 2.35009700  |
| H | 3.53082500  | -2.80549800 | 3.41017100  |
| H | 4.36160700  | -1.82652500 | 2.17481100  |
| C | 3.91795700  | -3.56303900 | 0.22189400  |
| O | 3.75396300  | -3.75039400 | 1.61795000  |
| C | 5.19523400  | -1.65005800 | -0.55710100 |
| C | 3.85254400  | -1.30965500 | -0.71812700 |
| C | 3.45907300  | -0.03878700 | -1.11782800 |
| C | 4.48343200  | 0.87852200  | -1.32267400 |
| C | 5.83317500  | 0.58297900  | -1.14978800 |
| C | 6.19554100  | -0.70411800 | -0.77327000 |
| C | 5.34443600  | -3.08901800 | -0.14339900 |
| H | 2.41347300  | 0.24942500  | -1.22655400 |
| H | 6.57354900  | 1.35579200  | -1.31598700 |
| H | 7.24129400  | -0.96075100 | -0.64236000 |
| H | 6.01954700  | -3.22588200 | 0.70655000  |
| H | 5.74165200  | -3.68396700 | -0.97186900 |
| C | -0.90709900 | -0.59345300 | 2.09490300  |
| C | -0.76746400 | 0.79704800  | 2.20845000  |
| C | -2.08763800 | -1.26953300 | 2.39862100  |
| C | -1.91370900 | 1.52469400  | 2.50020100  |
| C | -3.21416900 | -0.48712000 | 2.67400000  |
| C | -3.15331800 | 0.90444400  | 2.68343600  |
| H | -1.84146600 | 2.60770300  | 2.55876700  |
| H | -4.15995500 | -0.98631900 | 2.87472200  |
| C | -2.18647000 | -2.77395200 | 2.41818300  |
| H | -2.50313500 | -3.11099400 | 3.40870900  |
| H | -1.23372900 | -3.25404500 | 2.18786600  |
| H | -2.92974300 | -3.13052400 | 1.69749000  |
| C | 0.57459500  | 1.45648800  | 2.04004100  |
| H | 0.97243500  | 1.26253300  | 1.03708000  |
| H | 1.28284000  | 1.07014600  | 2.77964500  |
| H | 0.48634200  | 2.53689100  | 2.16918900  |
| H | 3.69702300  | -4.53902500 | -0.20939600 |
| C | -4.38570500 | 1.74662500  | 2.86949500  |
| H | -5.25937200 | 1.13716300  | 3.10942100  |
| H | -4.24578400 | 2.48340200  | 3.66546100  |

|   |             |             |             |
|---|-------------|-------------|-------------|
| H | -4.58697800 | 2.29650900  | 1.94314900  |
| N | 4.12792800  | 2.23554800  | -1.74478000 |
| O | 4.92383300  | 3.13202400  | -1.52158400 |
| O | 3.05513800  | 2.39196000  | -2.30098000 |
| C | -5.83172800 | -2.35662500 | -0.79732300 |
| C | -4.55010800 | -1.82300200 | -0.71492500 |
| C | -3.81514200 | -1.53983800 | -1.87127400 |
| C | -4.39200100 | -1.80874800 | -3.11225900 |
| C | -5.67866000 | -2.33962200 | -3.20053100 |
| C | -6.40157200 | -2.61569500 | -2.04345500 |
| H | -6.38972300 | -2.56537800 | 0.11038800  |
| H | -4.12366600 | -1.58744500 | 0.25883200  |
| H | -3.83069900 | -1.59404900 | -4.01780300 |
| H | -6.11434300 | -2.53732900 | -4.17500200 |
| H | -7.40243500 | -3.02988200 | -2.11115000 |
| C | -2.42227700 | -0.95394400 | -1.76796600 |
| H | -1.96047500 | -0.98614900 | -2.76542900 |
| C | -1.55750300 | -1.86197400 | -0.85126300 |
| C | -0.06262400 | -1.63283200 | -0.90199700 |
| O | 0.60206400  | -1.99881200 | -1.88693400 |
| H | -1.94036000 | -1.76491200 | 0.15792900  |
| C | -3.39001200 | 1.39831000  | -0.87849400 |
| C | -2.39874400 | 0.45512600  | -1.25236600 |
| C | -1.18026800 | 1.07672700  | -0.99387200 |
| N | -1.49313900 | 2.33520700  | -0.52109700 |
| H | -1.68961600 | -2.90285900 | -1.16823100 |
| N | -2.83521500 | 2.52440000  | -0.44683900 |
| C | -0.63473100 | 3.41058800  | -0.20121700 |
| C | 0.65625000  | 3.47385900  | -0.73024200 |
| C | -1.09487800 | 4.42651300  | 0.64149900  |
| C | 1.49731300  | 4.52258500  | -0.37423100 |
| H | 0.99904200  | 2.69017800  | -1.39011700 |
| C | -0.24569100 | 5.47532400  | 0.98232700  |
| H | -2.11191400 | 4.38224100  | 1.01262500  |
| C | 1.05679200  | 5.52497900  | 0.48842400  |
| H | 2.50008000  | 4.54963700  | -0.79260000 |
| H | -0.60797500 | 6.25806100  | 1.64164700  |
| H | 1.71481200  | 6.34273200  | 0.76345600  |
| N | 0.08452400  | 0.54113200  | -1.06148300 |
| H | 0.25211400  | 0.22908400  | -2.01971700 |
| C | -4.88679800 | 1.31168500  | -0.90105300 |
| H | -5.26098400 | 0.69673300  | -0.07568900 |
| H | -5.30131500 | 2.31700200  | -0.79805900 |
| H | -5.25400500 | 0.86380000  | -1.82789400 |

**M7R**

|   |             |             |             |
|---|-------------|-------------|-------------|
| C | 0.72735200  | 0.88143400  | -0.60557300 |
| C | 2.42067300  | 1.94272900  | -1.51107400 |
| C | 2.45158900  | 1.98509700  | 0.95275000  |
| H | 1.67519000  | 1.98506100  | 1.71581100  |
| N | 1.78318500  | 1.42920100  | -2.51892700 |
| N | 0.73514800  | 0.76818000  | -1.93696600 |
| N | 1.81022600  | 1.63584300  | -0.32563700 |
| C | 3.59784400  | 2.86067500  | -1.46784000 |
| H | 3.72882300  | 3.35277100  | -2.43111500 |
| H | 4.51637000  | 2.31090100  | -1.21983900 |
| C | 3.20918900  | 3.35956400  | 0.82780900  |
| O | 3.29023600  | 3.84797900  | -0.50303600 |
| C | 4.75188900  | 1.62067300  | 1.53151300  |
| C | 3.53740700  | 0.98527600  | 1.28235900  |
| C | 3.40506100  | -0.39557300 | 1.34025100  |
| C | 4.55831700  | -1.11222700 | 1.62858200  |
| C | 5.79303600  | -0.51350400 | 1.87494900  |
| C | 5.88969000  | 0.87163000  | 1.83208000  |
| C | 4.60804100  | 3.11621600  | 1.44361900  |
| H | 2.43364400  | -0.86294400 | 1.20673500  |
| H | 6.65198200  | -1.13426400 | 2.09640300  |
| H | 6.84061400  | 1.35739800  | 2.02326400  |
| H | 5.37980400  | 3.59056800  | 0.83005100  |
| H | 4.66895300  | 3.56308200  | 2.44088100  |
| C | -0.14772300 | -0.00918500 | -2.76602400 |
| C | 0.25329500  | -1.30645000 | -3.09311900 |
| C | -1.35967500 | 0.54991700  | -3.16860600 |
| C | -0.64603000 | -2.08400100 | -3.81825400 |
| C | -2.22515800 | -0.27008800 | -3.89163400 |
| C | -1.89345600 | -1.58953700 | -4.20631800 |
| H | -0.37157300 | -3.10358900 | -4.07583800 |
| H | -3.18401800 | 0.13064600  | -4.21032300 |
| C | -1.71902300 | 1.96323900  | -2.79917300 |
| H | -0.95173100 | 2.66341900  | -3.14400000 |
| H | -1.79444100 | 2.06062600  | -1.71013800 |
| H | -2.67276200 | 2.24614800  | -3.24679000 |
| C | 1.59522500  | -1.83638700 | -2.66258300 |
| H | 1.71278100  | -1.80018200 | -1.57342200 |
| H | 2.40539100  | -1.24245300 | -3.09619600 |
| H | 1.71748000  | -2.87244600 | -2.98040900 |
| H | 2.66209100  | 4.13339600  | 1.36542000  |
| C | -2.87398800 | -2.47594400 | -4.92789300 |

|   |             |             |             |
|---|-------------|-------------|-------------|
| H | -2.35962100 | -3.19253000 | -5.57210000 |
| H | -3.46712200 | -3.04654200 | -4.20558200 |
| H | -3.56424200 | -1.88997700 | -5.53833400 |
| N | 4.47222800  | -2.57682700 | 1.67673700  |
| O | 5.47396800  | -3.19872500 | 1.98890600  |
| O | 3.40564900  | -3.09472800 | 1.39582300  |
| C | -4.44203400 | -3.55480900 | -0.82237000 |
| C | -3.72771700 | -2.46967500 | -0.32478900 |
| C | -2.69933700 | -2.65612600 | 0.60616200  |
| C | -2.40162800 | -3.95374900 | 1.02245200  |
| C | -3.11338400 | -5.04464100 | 0.52499400  |
| C | -4.13613400 | -4.84839800 | -0.39831100 |
| H | -5.24066300 | -3.39280400 | -1.54011900 |
| H | -3.97363200 | -1.45986600 | -0.64685400 |
| H | -1.60588700 | -4.10945700 | 1.74649700  |
| H | -2.86976400 | -6.04723300 | 0.86283300  |
| H | -4.69450000 | -5.69568800 | -0.78369500 |
| C | -1.89680400 | -1.47669800 | 1.11792100  |
| H | -1.25498900 | -1.81531700 | 1.94114300  |
| C | -0.97745000 | -0.93906200 | 0.00838500  |
| C | -0.21477400 | 0.31059100  | 0.52162000  |
| O | 0.49076600  | 0.10928800  | 1.60135700  |
| H | -1.59322800 | -0.71187100 | -0.86658900 |
| C | -3.92186500 | -0.22556100 | 2.34806600  |
| C | -2.73628600 | -0.32094200 | 1.57692200  |
| C | -2.36756600 | 0.98637300  | 1.34499700  |
| N | -3.30347200 | 1.78286800  | 1.94055000  |
| H | -0.24548100 | -1.70420500 | -0.27052800 |
| N | -4.25763800 | 1.03494800  | 2.57322600  |
| C | -3.33261400 | 3.19213200  | 2.04605900  |
| C | -2.85702300 | 3.99430900  | 1.00647400  |
| C | -3.86122300 | 3.77449500  | 3.20052300  |
| C | -2.89210500 | 5.38000800  | 1.13969500  |
| H | -2.48211400 | 3.53643600  | 0.09797200  |
| C | -3.90443300 | 5.15894000  | 3.31210500  |
| H | -4.23239300 | 3.13051000  | 3.98851200  |
| C | -3.41382000 | 5.96830000  | 2.28827300  |
| H | -2.52230700 | 6.00045200  | 0.32975400  |
| H | -4.31683600 | 5.60712300  | 4.21030900  |
| H | -3.44377100 | 7.04842500  | 2.38383600  |
| N | -1.25333000 | 1.42967300  | 0.63351300  |
| H | -0.81347600 | 2.21568400  | 1.11333700  |
| C | -4.75918600 | -1.34540700 | 2.88000700  |
| H | -4.13722500 | -2.08178800 | 3.39730000  |

|   |             |             |            |
|---|-------------|-------------|------------|
| H | -5.50284600 | -0.95594000 | 3.57740800 |
| H | -5.27402700 | -1.87105200 | 2.06979100 |

**M7R'**

|   |             |             |             |
|---|-------------|-------------|-------------|
| C | 0.84903600  | 1.51312100  | -0.21607800 |
| C | 2.09495200  | 3.00122400  | -1.23047200 |
| C | 3.18369200  | 1.95349000  | 0.78760200  |
| H | 2.77843500  | 2.23377300  | 1.75704600  |
| N | 0.99564300  | 2.96033500  | -1.92311800 |
| N | 0.23859000  | 2.02110900  | -1.28753300 |
| N | 2.06523400  | 2.10673300  | -0.18891700 |
| C | 3.23902900  | 3.94240400  | -1.44847500 |
| H | 2.84040200  | 4.92751800  | -1.69516600 |
| H | 3.86028900  | 3.60655200  | -2.28717200 |
| C | 4.36809800  | 2.83975100  | 0.30310900  |
| O | 3.97949700  | 4.07237700  | -0.25722900 |
| C | 4.98290900  | 0.57365600  | -0.00350300 |
| C | 3.82864800  | 0.58142300  | 0.78668100  |
| C | 3.45236900  | -0.54231500 | 1.51103900  |
| C | 4.22493800  | -1.68219400 | 1.34173300  |
| C | 5.35186900  | -1.73787000 | 0.52503800  |
| C | 5.74733200  | -0.58386800 | -0.14044000 |
| C | 5.23610600  | 1.93118800  | -0.59640200 |
| H | 2.55785500  | -0.51449700 | 2.12674400  |
| H | 5.90588400  | -2.66439200 | 0.43653900  |
| H | 6.64213200  | -0.58753500 | -0.75341300 |
| H | 4.91107000  | 1.95069800  | -1.64268200 |
| H | 6.28793100  | 2.22311200  | -0.57657900 |
| C | -1.07302500 | 1.70939100  | -1.79818600 |
| C | -1.23048500 | 0.62465600  | -2.65886600 |
| C | -2.13056300 | 2.53585600  | -1.40467400 |
| C | -2.53444000 | 0.31898400  | -3.06047700 |
| C | -3.40611700 | 2.19207500  | -1.83422900 |
| C | -3.62885300 | 1.07310600  | -2.64281900 |
| H | -2.68999300 | -0.52953900 | -3.72334400 |
| H | -4.25017900 | 2.79821800  | -1.51327400 |
| C | -1.88670600 | 3.73389000  | -0.53124800 |
| H | -1.13487600 | 4.39675100  | -0.96982800 |
| H | -1.52283400 | 3.41937600  | 0.45227200  |
| H | -2.81074900 | 4.29588000  | -0.38726400 |
| C | -0.06980000 | -0.16905300 | -3.20565400 |
| H | 0.87433200  | 0.06754600  | -2.71131200 |
| H | 0.05050300  | 0.04157600  | -4.27247500 |
| H | -0.24693600 | -1.24297000 | -3.09914500 |

|   |             |             |             |
|---|-------------|-------------|-------------|
| H | 4.94272200  | 3.09520400  | 1.19616300  |
| C | -5.02664500 | 0.68559800  | -3.04925000 |
| H | -5.06539900 | 0.38868600  | -4.10058300 |
| H | -5.37542200 | -0.16359100 | -2.45248900 |
| H | -5.72642700 | 1.50910200  | -2.89133100 |
| N | 3.81203000  | -2.89409800 | 2.05366700  |
| O | 4.29342200  | -3.95834600 | 1.70439700  |
| O | 2.99327000  | -2.77632700 | 2.95141300  |
| C | -0.47773000 | -4.83413100 | -1.46030100 |
| C | -0.66199400 | -3.62847700 | -0.79167500 |
| C | 0.03126900  | -3.35314100 | 0.39362800  |
| C | 0.90897200  | -4.31543700 | 0.89422000  |
| C | 1.09899600  | -5.52384200 | 0.22406900  |
| C | 0.40788600  | -5.78694400 | -0.95445400 |
| H | -1.02615500 | -5.03427200 | -2.37579700 |
| H | -1.36535300 | -2.89210500 | -1.17775500 |
| H | 1.44660400  | -4.11967200 | 1.81842900  |
| H | 1.78931500  | -6.25800700 | 0.62810500  |
| H | 0.55340300  | -6.72789400 | -1.47544900 |
| C | -0.12969800 | -2.01201900 | 1.08176700  |
| H | 0.43246100  | -2.02851900 | 2.02574900  |
| C | 0.46067400  | -0.90092100 | 0.19732400  |
| C | 0.32451900  | 0.49499400  | 0.86536000  |
| O | 0.96044600  | 0.68224800  | 1.99366300  |
| H | -0.07805500 | -0.90966400 | -0.75638800 |
| C | -2.76218900 | -2.32646200 | 1.53177600  |
| C | -1.55886000 | -1.61001700 | 1.30916900  |
| C | -1.94595000 | -0.28691400 | 1.23938600  |
| N | -3.30355000 | -0.25671100 | 1.40352700  |
| H | 1.51834400  | -1.08837200 | -0.00975200 |
| N | -3.80597500 | -1.51340300 | 1.58510700  |
| C | -4.19798100 | 0.82022500  | 1.20126900  |
| C | -3.91498200 | 2.09888800  | 1.67912600  |
| C | -5.38586600 | 0.57901800  | 0.50612200  |
| C | -4.80685300 | 3.13999700  | 1.42975100  |
| H | -3.02501100 | 2.28192000  | 2.26994600  |
| C | -6.27662300 | 1.62075900  | 0.27819800  |
| H | -5.58897200 | -0.42585600 | 0.15489800  |
| C | -5.98763700 | 2.90868700  | 0.72961300  |
| H | -4.57991900 | 4.13343000  | 1.80396800  |
| H | -7.19681400 | 1.42590900  | -0.26375200 |
| H | -6.68242100 | 3.72151900  | 0.54645300  |
| N | -1.15037700 | 0.82428600  | 0.97305600  |
| H | -1.18171700 | 1.49367800  | 1.73863000  |

|   |             |             |            |
|---|-------------|-------------|------------|
| C | -2.94555000 | -3.80020300 | 1.72036100 |
| H | -3.95325700 | -4.00088400 | 2.08873500 |
| H | -2.79817900 | -4.34014600 | 0.78009900 |
| H | -2.21962400 | -4.19557100 | 2.43601700 |

**M7S**

|   |             |             |             |
|---|-------------|-------------|-------------|
| C | -0.82290700 | 1.04172300  | -0.73389600 |
| C | -1.55004300 | 0.56053400  | -2.75175400 |
| C | 0.59657600  | -0.47995700 | -2.23913200 |
| H | 1.41776600  | -0.26192300 | -1.55183600 |
| N | -2.48386900 | 1.29650400  | -2.22970700 |
| N | -2.02142800 | 1.57580500  | -0.96930100 |
| N | -0.52337300 | 0.37524300  | -1.86840400 |
| C | -1.34990300 | 0.04032900  | -4.13890600 |
| H | -2.01620600 | 0.55229500  | -4.83264400 |
| H | -1.54016000 | -1.03914400 | -4.18942400 |
| C | 1.02391300  | -0.19852000 | -3.71851300 |
| O | -0.01816600 | 0.36921300  | -4.50246400 |
| C | 0.72658400  | -2.56791400 | -3.39528100 |
| C | 0.21089700  | -1.94698200 | -2.25522300 |
| C | -0.56489800 | -2.64298400 | -1.34161100 |
| C | -0.77456000 | -3.99297700 | -1.60017000 |
| C | -0.25233100 | -4.64809500 | -2.71038700 |
| C | 0.50557000  | -3.92273600 | -3.62389400 |
| C | 1.46986800  | -1.57528500 | -4.25032500 |
| H | -1.01270200 | -2.18183000 | -0.46868400 |
| H | -0.45745000 | -5.70143600 | -2.85351900 |
| H | 0.90257300  | -4.40748700 | -4.50918000 |
| H | 1.24790500  | -1.66687000 | -5.31621800 |
| H | 2.55120100  | -1.69599000 | -4.12242000 |
| C | -2.88466900 | 2.35042500  | -0.10812200 |
| C | -3.94071500 | 1.68296700  | 0.50619700  |
| C | -2.68549400 | 3.72799100  | -0.01784700 |
| C | -4.82668300 | 2.45136600  | 1.26377100  |
| C | -3.59736500 | 4.45010100  | 0.74478500  |
| C | -4.66987100 | 3.82999600  | 1.39369500  |
| H | -5.65767800 | 1.95666900  | 1.75984200  |
| H | -3.46527100 | 5.52527500  | 0.84065300  |
| C | -1.49857800 | 4.37642100  | -0.66991700 |
| H | -1.41111100 | 4.09190900  | -1.72337900 |
| H | -0.60219300 | 4.03721700  | -0.14013400 |
| H | -1.56569800 | 5.46379600  | -0.60944400 |
| C | -4.11447200 | 0.19489000  | 0.35498100  |
| H | -3.21564500 | -0.34198800 | 0.67591500  |

|   |             |             |             |
|---|-------------|-------------|-------------|
| H | -4.30350300 | -0.07583900 | -0.68840100 |
| H | -4.95214400 | -0.15701500 | 0.95852000  |
| H | 1.83058100  | 0.53556000  | -3.75443300 |
| C | -5.62284400 | 4.64467700  | 2.22970200  |
| H | -5.13806900 | 4.97759000  | 3.15276600  |
| H | -5.94973700 | 5.53887900  | 1.69225400  |
| H | -6.50615500 | 4.06448600  | 2.50391100  |
| N | -1.60531700 | -4.75691600 | -0.66045000 |
| O | -1.74576600 | -5.94967800 | -0.86499200 |
| O | -2.11094000 | -4.15410900 | 0.26977200  |
| C | 2.19379100  | -3.70359400 | 3.07966000  |
| C | 2.06569300  | -2.43160800 | 2.53045500  |
| C | 1.20474600  | -1.48897300 | 3.10209500  |
| C | 0.47134000  | -1.85118000 | 4.23280100  |
| C | 0.59457000  | -3.12511500 | 4.78515600  |
| C | 1.45738900  | -4.05453900 | 4.21099800  |
| H | 2.87173800  | -4.42178500 | 2.62861300  |
| H | 2.64963200  | -2.15121900 | 1.65635700  |
| H | -0.20076500 | -1.12570100 | 4.68440100  |
| H | 0.01902200  | -3.38889200 | 5.66697900  |
| H | 1.55964400  | -5.04503100 | 4.64274600  |
| C | 1.03391100  | -0.11737800 | 2.48119700  |
| H | 0.50572300  | 0.53031900  | 3.19285900  |
| C | 0.14975500  | -0.19753600 | 1.22430700  |
| C | 0.02463600  | 1.21760700  | 0.58255600  |
| O | -0.45879600 | 2.13231300  | 1.35116700  |
| H | 0.59132600  | -0.92547700 | 0.52972600  |
| C | 3.59675900  | 0.64098100  | 2.67080300  |
| C | 2.31871900  | 0.53636800  | 2.06487200  |
| C | 2.41394100  | 1.29925700  | 0.92069700  |
| N | 3.68618800  | 1.79418700  | 0.86927800  |
| H | -0.85460900 | -0.53899300 | 1.49822400  |
| N | 4.41399300  | 1.39913400  | 1.95727100  |
| C | 4.26862300  | 2.65634100  | -0.08769700 |
| C | 3.87004900  | 2.61110900  | -1.42585700 |
| C | 5.26846500  | 3.54308100  | 0.31876600  |
| C | 4.45925800  | 3.47322100  | -2.34681100 |
| H | 3.11611100  | 1.89831500  | -1.73990500 |
| C | 5.85891900  | 4.38575000  | -0.61514000 |
| H | 5.56838600  | 3.55251100  | 1.35949800  |
| C | 5.45351800  | 4.36222700  | -1.94903700 |
| H | 4.14425800  | 3.43651900  | -3.38481700 |
| H | 6.63563900  | 5.07252800  | -0.29451100 |
| H | 5.91117200  | 5.02928200  | -2.67170100 |

|   |            |             |             |
|---|------------|-------------|-------------|
| N | 1.41297200 | 1.52572900  | -0.02208800 |
| H | 1.39969300 | 2.50690700  | -0.30334400 |
| C | 4.06119500 | 0.01177800  | 3.94594000  |
| H | 4.21018200 | -1.06540800 | 3.82276300  |
| H | 5.00296000 | 0.46329900  | 4.26269700  |
| H | 3.31695600 | 0.14537100  | 4.73604500  |

**M7S'**

|   |             |             |             |
|---|-------------|-------------|-------------|
| C | -1.09984900 | 0.29738200  | 0.54264200  |
| C | -2.63003700 | 0.23603500  | 2.11117100  |
| C | -3.52823000 | -0.08970700 | -0.18223800 |
| H | -3.26287900 | 0.39963500  | -1.11840600 |
| N | -1.51098400 | 0.37707300  | 2.75519100  |
| N | -0.56765000 | 0.40456500  | 1.76616800  |
| N | -2.42653200 | 0.19490500  | 0.75780700  |
| C | -4.03391500 | 0.20247500  | 2.61506400  |
| H | -4.09591800 | 0.67326100  | 3.59593300  |
| H | -4.39268300 | -0.83325600 | 2.69490900  |
| C | -4.90860500 | 0.37765300  | 0.41941700  |
| O | -4.80845200 | 0.96063700  | 1.70778900  |
| C | -4.94194600 | -2.02704600 | 0.03650800  |
| C | -3.67826300 | -1.58298000 | -0.34258600 |
| C | -2.69300100 | -2.45901200 | -0.76913700 |
| C | -3.00679100 | -3.80871200 | -0.74946300 |
| C | -4.25634500 | -4.29531700 | -0.36717400 |
| C | -5.23903700 | -3.39112400 | 0.01893000  |
| C | -5.83052800 | -0.87117200 | 0.40831900  |
| H | -1.75139000 | -2.07278700 | -1.14197000 |
| H | -4.44028700 | -5.36241900 | -0.37484600 |
| H | -6.21920600 | -3.74969100 | 0.31457000  |
| H | -6.31605100 | -0.99882800 | 1.38102000  |
| H | -6.62821700 | -0.74876300 | -0.33014000 |
| C | 0.82215500  | 0.54110400  | 2.12385500  |
| C | 1.57262600  | -0.62568600 | 2.32071300  |
| C | 1.35140700  | 1.82181500  | 2.28834300  |
| C | 2.92247200  | -0.47065200 | 2.61801800  |
| C | 2.71433500  | 1.91994500  | 2.58363200  |
| C | 3.51525300  | 0.79091000  | 2.73013500  |
| H | 3.52866200  | -1.36188400 | 2.76079100  |
| H | 3.15237400  | 2.90913800  | 2.69913500  |
| C | 0.52242200  | 3.07678200  | 2.17842100  |
| H | 0.41941800  | 3.54254500  | 3.16281200  |
| H | -0.48014700 | 2.88861100  | 1.79039900  |
| H | 1.01220200  | 3.79771000  | 1.51630300  |

|   |             |             |             |
|---|-------------|-------------|-------------|
| C | 0.94806400  | -1.99305600 | 2.26343200  |
| H | 0.28846100  | -2.09535000 | 1.39909000  |
| H | 0.35975800  | -2.18105900 | 3.16816700  |
| H | 1.72399200  | -2.75937400 | 2.18774400  |
| H | -5.31573100 | 1.17257600  | -0.20460400 |
| C | 4.99384600  | 0.91651600  | 2.98713600  |
| H | 5.24169500  | 1.88951500  | 3.41663700  |
| H | 5.34397400  | 0.13613200  | 3.66702900  |
| H | 5.55122500  | 0.81259900  | 2.05026200  |
| N | -1.96123400 | -4.76232800 | -1.13349700 |
| O | -2.25849900 | -5.94037500 | -1.21285700 |
| O | -0.83975800 | -4.32367900 | -1.34000700 |
| C | 3.24590700  | 4.87184100  | -0.87375300 |
| C | 2.69760100  | 3.59711500  | -0.96426000 |
| C | 1.90938600  | 3.23190600  | -2.06349000 |
| C | 1.68611000  | 4.17220700  | -3.06799700 |
| C | 2.23767900  | 5.45122300  | -2.98300700 |
| C | 3.01752600  | 5.80494500  | -1.88622300 |
| H | 3.85582000  | 5.13781400  | -0.01547500 |
| H | 2.89108800  | 2.86252500  | -0.18286500 |
| H | 1.07753500  | 3.89975900  | -3.92647400 |
| H | 2.05755200  | 6.17022600  | -3.77620900 |
| H | 3.44749300  | 6.79918200  | -1.81863300 |
| C | 1.28841000  | 1.84963500  | -2.12139400 |
| H | 0.78519300  | 1.72737200  | -3.08951100 |
| C | 0.23345200  | 1.72245300  | -1.00266100 |
| C | -0.40074900 | 0.30638500  | -0.88582900 |
| O | -1.25122100 | -0.00775200 | -1.82353900 |
| H | 0.73071200  | 2.00229400  | -0.07219700 |
| C | 3.66110600  | 0.56823000  | -2.18634900 |
| C | 2.28228700  | 0.74597000  | -1.89963400 |
| C | 1.90960800  | -0.42043100 | -1.26778400 |
| N | 3.01248400  | -1.21772200 | -1.20320700 |
| H | -0.59456100 | 2.41771200  | -1.17512800 |
| N | 4.09839100  | -0.61188100 | -1.76693800 |
| C | 3.12313700  | -2.47386300 | -0.56382900 |
| C | 2.16709100  | -3.46208100 | -0.79585100 |
| C | 4.18496300  | -2.70919800 | 0.30986800  |
| C | 2.24431600  | -4.67215400 | -0.11207300 |
| H | 1.38246300  | -3.30465100 | -1.52844100 |
| C | 4.26756500  | -3.93003900 | 0.97174300  |
| H | 4.92227500  | -1.92840900 | 0.46348600  |
| C | 3.29203400  | -4.90884400 | 0.77450000  |
| H | 1.48596800  | -5.42733700 | -0.29163700 |

|   |            |             |             |
|---|------------|-------------|-------------|
| H | 5.09212700 | -4.11450500 | 1.65301900  |
| H | 3.35684700 | -5.85454700 | 1.30237000  |
| N | 0.69222800 | -0.71448700 | -0.68229100 |
| H | 0.31978000 | -1.61772500 | -0.95909600 |
| C | 4.59312800 | 1.50915300  | -2.88470800 |
| H | 4.84358800 | 2.36396200  | -2.24901000 |
| H | 5.51384100 | 0.98596900  | -3.14916500 |
| H | 4.13656400 | 1.90844100  | -3.79465400 |

### TS8R

|   |             |             |             |
|---|-------------|-------------|-------------|
| C | 0.84159100  | 0.86604000  | -0.40824100 |
| C | 2.21496300  | 2.25019200  | -1.47619100 |
| C | 2.65633200  | 2.01692900  | 0.94812000  |
| H | 1.98895300  | 1.96058700  | 1.80818900  |
| N | 1.47511200  | 1.75136800  | -2.41780400 |
| N | 0.63717500  | 0.89798000  | -1.73111700 |
| N | 1.85543900  | 1.75375400  | -0.25058800 |
| C | 3.29963800  | 3.27412700  | -1.52679400 |
| H | 3.19136900  | 3.90861200  | -2.40627000 |
| H | 4.28639700  | 2.79015400  | -1.55975800 |
| C | 3.39357200  | 3.40489100  | 0.84325600  |
| O | 3.15438500  | 4.08594900  | -0.37696200 |
| C | 5.02279600  | 1.61092000  | 1.08851100  |
| C | 3.77067600  | 1.00313300  | 1.05073500  |
| C | 3.62372800  | -0.37660600 | 1.06379000  |
| C | 4.79309800  | -1.12295900 | 1.09587600  |
| C | 6.06426500  | -0.55162700 | 1.13439000  |
| C | 6.18022500  | 0.83272700  | 1.13572300  |
| C | 4.89879300  | 3.11100200  | 1.07702000  |
| H | 2.64232200  | -0.84085600 | 1.07855800  |
| H | 6.93592000  | -1.19326200 | 1.15858100  |
| H | 7.16086400  | 1.29588400  | 1.16409800  |
| H | 5.50527200  | 3.58124900  | 0.29625300  |
| H | 5.22785600  | 3.53293100  | 2.03126100  |
| C | -0.24632700 | 0.04235300  | -2.47239400 |
| C | 0.26463700  | -1.18583700 | -2.90799800 |
| C | -1.56669900 | 0.43369500  | -2.68494900 |
| C | -0.60167200 | -2.03981600 | -3.58221200 |
| C | -2.39660100 | -0.45475700 | -3.37431900 |
| C | -1.93421800 | -1.69089200 | -3.82302200 |
| H | -0.23266700 | -3.00386000 | -3.92376600 |
| H | -3.43272300 | -0.17551600 | -3.55066400 |
| C | -2.09608800 | 1.72718100  | -2.12698200 |

|   |             |             |             |
|---|-------------|-------------|-------------|
| H | -1.36781800 | 2.53631600  | -2.22800600 |
| H | -2.31537600 | 1.61153200  | -1.05835500 |
| H | -3.01774600 | 2.01811100  | -2.63371000 |
| C | 1.69104700  | -1.56947500 | -2.61577800 |
| H | 1.85728100  | -1.66456400 | -1.53629300 |
| H | 2.38714500  | -0.81104500 | -2.98621200 |
| H | 1.93564500  | -2.52462300 | -3.08257300 |
| H | 3.00317900  | 4.07806200  | 1.60595500  |
| C | -2.84275300 | -2.64736900 | -4.55025100 |
| H | -2.46590300 | -2.85421700 | -5.55628200 |
| H | -2.90011900 | -3.60187200 | -4.01813800 |
| H | -3.85366800 | -2.24404100 | -4.64059000 |
| N | 4.68301500  | -2.58603000 | 1.07996100  |
| O | 5.70692900  | -3.23769600 | 1.19686300  |
| O | 3.57340300  | -3.07208400 | 0.94340800  |
| C | -3.99781500 | -3.44709000 | -1.17866200 |
| C | -3.36326500 | -2.42719900 | -0.47813600 |
| C | -2.67834100 | -2.69549000 | 0.71207600  |
| C | -2.63827700 | -4.00690900 | 1.18309500  |
| C | -3.27193100 | -5.03359500 | 0.48265700  |
| C | -3.95336800 | -4.75698300 | -0.69900700 |
| H | -4.53386100 | -3.21862700 | -2.09530500 |
| H | -3.40631900 | -1.40439700 | -0.84805500 |
| H | -2.10879300 | -4.22633400 | 2.10670700  |
| H | -3.23402700 | -6.04916600 | 0.86418800  |
| H | -4.45145400 | -5.55443100 | -1.24124200 |
| C | -1.97213000 | -1.57196900 | 1.44749200  |
| H | -1.60595100 | -1.95983300 | 2.40706100  |
| C | -0.76772500 | -1.08091300 | 0.61077900  |
| C | -0.11178900 | 0.16175400  | 1.21376200  |
| O | 0.74816100  | 0.06677400  | 2.11011900  |
| H | -1.14118200 | -0.85946400 | -0.39132000 |
| C | -4.22014400 | -0.20288500 | 1.99878200  |
| C | -2.85055500 | -0.37276300 | 1.66961100  |
| C | -2.35682400 | 0.91035400  | 1.58937300  |
| N | -3.38906100 | 1.76615100  | 1.83866000  |
| H | 0.00099800  | -1.85518900 | 0.53437900  |
| N | -4.53630400 | 1.07749000  | 2.11374100  |
| C | -3.37846400 | 3.18025200  | 1.91500500  |
| C | -2.50544500 | 3.93020600  | 1.12260600  |
| C | -4.27050500 | 3.81743400  | 2.77994000  |
| C | -2.51907600 | 5.31918700  | 1.21781700  |
| H | -1.83229000 | 3.43308600  | 0.43336400  |
| C | -4.28140500 | 5.20542600  | 2.85224800  |

|   |             |             |            |
|---|-------------|-------------|------------|
| H | -4.94349200 | 3.21457100  | 3.37735100 |
| C | -3.40301700 | 5.96284900  | 2.07876800 |
| H | -1.83998600 | 5.89909300  | 0.60125600 |
| H | -4.97690100 | 5.69648900  | 3.52520000 |
| H | -3.41142200 | 7.04553200  | 2.14444200 |
| N | -1.04966900 | 1.28881700  | 1.29847600 |
| H | -0.67829600 | 1.98527900  | 1.94133500 |
| C | -5.25345200 | -1.26302700 | 2.21407500 |
| H | -4.89033000 | -2.02267900 | 2.91211300 |
| H | -6.16379300 | -0.81613800 | 2.61699300 |
| H | -5.49307800 | -1.77425800 | 1.27665400 |

**TS8R'**

|   |             |             |             |
|---|-------------|-------------|-------------|
| C | 0.99331500  | 1.31456700  | -0.30196800 |
| C | 1.82840300  | 3.18526700  | -1.15600600 |
| C | 3.13064400  | 2.18945900  | 0.75336100  |
| H | 2.70962800  | 2.28605900  | 1.75400300  |
| N | 0.77756300  | 2.94040500  | -1.87953300 |
| N | 0.28806600  | 1.77881500  | -1.33847900 |
| N | 2.00560900  | 2.21313200  | -0.20171500 |
| C | 2.74449600  | 4.36483600  | -1.26063700 |
| H | 2.15289000  | 5.27363700  | -1.38233200 |
| H | 3.39790000  | 4.26677600  | -2.13621000 |
| C | 4.11903100  | 3.32717500  | 0.37073500  |
| O | 3.48474500  | 4.50857300  | -0.06634700 |
| C | 5.11590400  | 1.24614000  | -0.20242600 |
| C | 3.99237900  | 0.95875600  | 0.57920800  |
| C | 3.78134900  | -0.30957900 | 1.09824600  |
| C | 4.71396900  | -1.28357700 | 0.76572800  |
| C | 5.84008400  | -1.03386700 | -0.01388500 |
| C | 6.04675600  | 0.25316800  | -0.49816800 |
| C | 5.12463300  | 2.69182000  | -0.61685300 |
| H | 2.92525100  | -0.51307800 | 1.73257900  |
| H | 6.53341000  | -1.83799700 | -0.22648800 |
| H | 6.92272500  | 0.47527900  | -1.09823700 |
| H | 4.78724100  | 2.78079400  | -1.65568700 |
| H | 6.11072700  | 3.15611400  | -0.55287500 |
| C | -0.91821600 | 1.19406600  | -1.85078900 |
| C | -0.85235700 | 0.01038000  | -2.58840700 |
| C | -2.13015300 | 1.83515400  | -1.55837400 |
| C | -2.06303100 | -0.57482300 | -2.97524900 |
| C | -3.30269200 | 1.22240400  | -1.98444400 |
| C | -3.29120000 | 0.00009500  | -2.66315600 |
| H | -2.03458500 | -1.50839600 | -3.53399700 |

|   |             |             |             |
|---|-------------|-------------|-------------|
| H | -4.25156500 | 1.70340700  | -1.76302800 |
| C | -2.16085800 | 3.14107300  | -0.81316400 |
| H | -1.76923500 | 3.95237800  | -1.43438200 |
| H | -1.54347400 | 3.08367900  | 0.08802700  |
| H | -3.18320700 | 3.38600000  | -0.51479400 |
| C | 0.44642200  | -0.63461000 | -3.00430700 |
| H | 1.29727800  | -0.28542100 | -2.41729200 |
| H | 0.65019300  | -0.41830500 | -4.05764400 |
| H | 0.38111700  | -1.72132700 | -2.89400200 |
| H | 4.65151100  | 3.60590300  | 1.28277900  |
| C | -4.58535500 | -0.68670700 | -3.01146800 |
| H | -4.44544600 | -1.42851800 | -3.80054100 |
| H | -4.98247900 | -1.20391900 | -2.13088000 |
| H | -5.34015100 | 0.03276600  | -3.33887500 |
| N | 4.49193700  | -2.64641500 | 1.26198900  |
| O | 5.37943000  | -3.46643100 | 1.10025600  |
| O | 3.42629100  | -2.88894800 | 1.80428000  |
| C | -0.94777100 | -4.71120400 | -1.72640800 |
| C | -1.04571800 | -3.56485300 | -0.94458400 |
| C | -0.46142600 | -3.51280700 | 0.32570600  |
| C | 0.22806700  | -4.63080500 | 0.79397200  |
| C | 0.32714400  | -5.78278700 | 0.01375700  |
| C | -0.26059000 | -5.82673800 | -1.24702100 |
| H | -1.41077700 | -4.73713700 | -2.70856600 |
| H | -1.59146100 | -2.69575400 | -1.30920900 |
| H | 0.69593900  | -4.59660200 | 1.77451700  |
| H | 0.86464900  | -6.64607500 | 0.39375900  |
| H | -0.18680400 | -6.72396700 | -1.85329500 |
| C | -0.51844100 | -2.23484200 | 1.13804000  |
| H | -0.16184100 | -2.45468900 | 2.15355100  |
| C | 0.42259600  | -1.19456800 | 0.49185000  |
| C | 0.37474400  | 0.17277200  | 1.18183400  |
| O | 1.11180600  | 0.44213100  | 2.15866800  |
| H | 0.10200700  | -1.08626200 | -0.54510800 |
| C | -3.20976700 | -2.07420900 | 1.18193900  |
| C | -1.87628300 | -1.59128300 | 1.19032600  |
| C | -2.00636800 | -0.22056500 | 1.28575200  |
| N | -3.33984300 | 0.05859600  | 1.34217200  |
| H | 1.45712900  | -1.54709200 | 0.50464500  |
| N | -4.08473300 | -1.08356700 | 1.27757600  |
| C | -3.98585500 | 1.30952200  | 1.46799000  |
| C | -3.47275900 | 2.29599800  | 2.30980500  |
| C | -5.16648100 | 1.53699500  | 0.75804600  |
| C | -4.10611300 | 3.53337900  | 2.38915500  |

|   |             |             |            |
|---|-------------|-------------|------------|
| H | -2.61324700 | 2.08835900  | 2.93759100 |
| C | -5.80260600 | 2.76877500  | 0.85926100 |
| H | -5.56266200 | 0.74306300  | 0.13494300 |
| C | -5.26682600 | 3.77745700  | 1.66079000 |
| H | -3.69924800 | 4.29841100  | 3.04201400 |
| H | -6.71852200 | 2.94426300  | 0.30427800 |
| H | -5.76161100 | 4.74032500  | 1.73010000 |
| N | -0.98232100 | 0.71794900  | 1.24119300 |
| H | -0.99719800 | 1.42497000  | 1.96673800 |
| C | -3.68730100 | -3.49098500 | 1.10802600 |
| H | -4.74584500 | -3.53579300 | 1.37037400 |
| H | -3.55442400 | -3.90189900 | 0.10290700 |
| H | -3.12263100 | -4.12934600 | 1.79298100 |

**TS8S**

|   |             |             |             |
|---|-------------|-------------|-------------|
| C | 1.38518300  | 0.72050900  | -0.52778800 |
| C | 1.31293200  | 1.25930500  | -2.68896100 |
| C | -0.47429300 | -0.24865100 | -1.98498700 |
| H | -0.56313600 | -0.99788500 | -1.19142200 |
| N | 2.36894100  | 1.86551500  | -2.24375800 |
| N | 2.38664700  | 1.52272700  | -0.90642800 |
| N | 0.69512800  | 0.55893000  | -1.68708200 |
| C | 0.76985400  | 1.08177500  | -4.06809400 |
| H | 1.49025600  | 1.41803300  | -4.81275900 |
| H | -0.16706700 | 1.63913300  | -4.19654300 |
| C | -0.31779100 | -0.96737300 | -3.36890800 |
| O | 0.58496100  | -0.31444700 | -4.25281900 |
| C | -2.50638400 | 0.05285300  | -3.20871700 |
| C | -1.76315600 | 0.53965100  | -2.13082100 |
| C | -2.24955400 | 1.56018900  | -1.32741300 |
| C | -3.53383000 | 2.01557300  | -1.59708200 |
| C | -4.31101000 | 1.53256900  | -2.64457900 |
| C | -3.77955500 | 0.55068600  | -3.47467800 |
| C | -1.75087400 | -1.02679900 | -3.93874600 |
| H | -1.68996900 | 1.98987700  | -0.50600600 |
| H | -5.30630200 | 1.92986000  | -2.79850400 |
| H | -4.35743600 | 0.17478200  | -4.31204700 |
| H | -1.73550300 | -0.88471100 | -5.02233000 |
| H | -2.19891800 | -2.00607100 | -3.73959000 |
| C | 3.49453900  | 1.97481500  | -0.10946200 |
| C | 3.29157400  | 2.94997100  | 0.86705700  |
| C | 4.75278400  | 1.42831400  | -0.38451500 |
| C | 4.40981600  | 3.39178200  | 1.57527600  |
| C | 5.83683800  | 1.90025200  | 0.35149000  |

|   |             |             |             |
|---|-------------|-------------|-------------|
| C | 5.68445100  | 2.88177300  | 1.33304200  |
| H | 4.27634300  | 4.15498500  | 2.33806100  |
| H | 6.82404100  | 1.48929400  | 0.15480500  |
| C | 4.92907600  | 0.36405500  | -1.43563500 |
| H | 4.81846100  | 0.78025900  | -2.44073500 |
| H | 4.17721600  | -0.42404700 | -1.32649800 |
| H | 5.91812400  | -0.08953100 | -1.35549300 |
| C | 1.92155500  | 3.47607100  | 1.19041600  |
| H | 1.98697100  | 4.45113200  | 1.67647300  |
| H | 1.43585800  | 2.77454400  | 1.87540500  |
| H | 1.29598200  | 3.57093200  | 0.29862200  |
| H | 0.10164200  | -1.96498500 | -3.23081900 |
| C | 6.86945000  | 3.35477300  | 2.13480700  |
| H | 7.03182700  | 2.70522200  | 3.00092700  |
| H | 7.78301400  | 3.33966600  | 1.53600000  |
| H | 6.71506100  | 4.36990300  | 2.50690500  |
| N | -4.10726600 | 3.02436100  | -0.69890400 |
| O | -5.29132800 | 3.28686800  | -0.82291300 |
| O | -3.37348200 | 3.53239300  | 0.12919500  |
| C | -4.76030300 | 0.44516300  | 1.18042900  |
| C | -3.49983400 | -0.11731100 | 1.36231700  |
| C | -2.66740000 | 0.31292100  | 2.40125400  |
| C | -3.12950200 | 1.31145700  | 3.25964600  |
| C | -4.39089100 | 1.87730100  | 3.08078900  |
| C | -5.20820600 | 1.45002900  | 2.03764900  |
| H | -5.39028500 | 0.10630500  | 0.36278700  |
| H | -3.14730800 | -0.89671600 | 0.68871500  |
| H | -2.48928800 | 1.65680300  | 4.06756500  |
| H | -4.73175500 | 2.65746500  | 3.75395800  |
| H | -6.18514400 | 1.89829000  | 1.88877600  |
| C | -1.24099800 | -0.19835300 | 2.50723600  |
| H | -0.84217400 | 0.07463800  | 3.49291700  |
| C | -0.41424200 | 0.51179400  | 1.41406100  |
| C | 1.00637400  | -0.04233500 | 1.28399300  |
| O | 1.90554900  | 0.29324900  | 2.06404600  |
| H | -0.95246300 | 0.34655200  | 0.48009600  |
| C | -1.78679300 | -2.81613300 | 2.70141200  |
| C | -1.07633000 | -1.67004500 | 2.26166900  |
| C | -0.04053100 | -2.17712200 | 1.50297200  |
| N | -0.16730900 | -3.53500000 | 1.49842800  |
| H | -0.36165100 | 1.58705900  | 1.60141000  |
| N | -1.23645800 | -3.93238300 | 2.25250800  |
| C | 0.66578300  | -4.50590600 | 0.89312900  |
| C | 1.31011500  | -4.23633800 | -0.31637000 |

|   |             |             |             |
|---|-------------|-------------|-------------|
| C | 0.81593100  | -5.74856300 | 1.51216500  |
| C | 2.12379700  | -5.20995000 | -0.88981100 |
| H | 1.16526800  | -3.27990500 | -0.80565500 |
| C | 1.61853700  | -6.71586500 | 0.91916600  |
| H | 0.29703600  | -5.93607000 | 2.44430100  |
| C | 2.28164200  | -6.45038700 | -0.27831700 |
| H | 2.62493100  | -4.99687700 | -1.82833600 |
| H | 1.73302600  | -7.68083000 | 1.40196300  |
| H | 2.91312700  | -7.20646400 | -0.73216400 |
| N | 0.94902900  | -1.45607900 | 0.83499900  |
| H | 1.87645600  | -1.86582200 | 0.93116400  |
| C | -3.01200100 | -2.85613500 | 3.55771100  |
| H | -3.87495400 | -2.44574200 | 3.02466300  |
| H | -3.23100900 | -3.88531900 | 3.84638900  |
| H | -2.87402200 | -2.25540000 | 4.46126100  |

**TS8S'**

|   |             |             |             |
|---|-------------|-------------|-------------|
| C | -1.15124100 | 0.35449200  | 0.64597500  |
| C | -2.57894700 | 0.32117300  | 2.34622200  |
| C | -3.59423100 | -0.08027100 | 0.12199700  |
| H | -3.40308800 | 0.37826700  | -0.84916100 |
| N | -1.42129400 | 0.48921900  | 2.90911900  |
| N | -0.55777100 | 0.49873400  | 1.83699100  |
| N | -2.45832500 | 0.25187500  | 0.98254800  |
| C | -3.95302700 | 0.26231400  | 2.92603900  |
| H | -3.98361700 | 0.75199400  | 3.89922200  |
| H | -4.27841600 | -0.78137000 | 3.04496400  |
| C | -4.95235200 | 0.38743300  | 0.76739900  |
| O | -4.80282100 | 0.97783100  | 2.04810900  |
| C | -4.98578400 | -2.02331700 | 0.41266900  |
| C | -3.72893700 | -1.57876600 | 0.01206800  |
| C | -2.73572500 | -2.45818200 | -0.38634200 |
| C | -3.04727900 | -3.80886000 | -0.35525300 |
| C | -4.29298200 | -4.29425700 | 0.04029700  |
| C | -5.27568900 | -3.38883200 | 0.42311500  |
| C | -5.86905000 | -0.86529400 | 0.79321100  |
| H | -1.76545200 | -2.10353000 | -0.70939100 |
| H | -4.47336500 | -5.36193900 | 0.04492200  |
| H | -6.25057000 | -3.74754900 | 0.73558100  |
| H | -6.32300500 | -0.98505600 | 1.78194100  |
| H | -6.68887500 | -0.75386700 | 0.07739900  |
| C | 0.85634900  | 0.61928600  | 2.04955100  |
| C | 1.61219700  | -0.55528400 | 2.13497400  |
| C | 1.41662400  | 1.89334000  | 2.15977200  |

|   |             |             |             |
|---|-------------|-------------|-------------|
| C | 2.98949700  | -0.41889200 | 2.28293100  |
| C | 2.80479800  | 1.97598200  | 2.29162500  |
| C | 3.60482300  | 0.83446200  | 2.32986100  |
| H | 3.59650500  | -1.31699300 | 2.35331600  |
| H | 3.26796100  | 2.95831800  | 2.35933700  |
| C | 0.56135800  | 3.13372100  | 2.15708600  |
| H | 0.11897400  | 3.29461100  | 3.14537100  |
| H | -0.26222800 | 3.05977600  | 1.44169500  |
| H | 1.15931600  | 4.01098200  | 1.90110700  |
| C | 0.94997500  | -1.90612600 | 2.09510700  |
| H | 0.39749300  | -2.03324700 | 1.15859400  |
| H | 0.24347000  | -2.01275200 | 2.92498000  |
| H | 1.69640700  | -2.70218300 | 2.15863100  |
| H | -5.38818800 | 1.17867600  | 0.15794100  |
| C | 5.10603900  | 0.93691900  | 2.38976600  |
| H | 5.42802500  | 1.92948900  | 2.71137600  |
| H | 5.52625300  | 0.19572400  | 3.07433900  |
| H | 5.53174500  | 0.74807300  | 1.39820200  |
| N | -2.00675500 | -4.76262700 | -0.74915700 |
| O | -2.23520700 | -5.95117700 | -0.61758600 |
| O | -0.95811300 | -4.31199100 | -1.18476300 |
| C | 3.04498700  | 4.93959200  | -0.89082300 |
| C | 2.55225400  | 3.64318000  | -0.99055300 |
| C | 1.91520400  | 3.20668700  | -2.15707800 |
| C | 1.78042000  | 4.09781200  | -3.22101200 |
| C | 2.27468500  | 5.39886000  | -3.12608700 |
| C | 2.90704200  | 5.82357500  | -1.96131600 |
| H | 3.54088800  | 5.26000700  | 0.02099500  |
| H | 2.67501800  | 2.94579300  | -0.16388900 |
| H | 1.28625100  | 3.77048300  | -4.13224500 |
| H | 2.16559000  | 6.07971300  | -3.96450300 |
| H | 3.29313700  | 6.83513300  | -1.88690600 |
| C | 1.34417400  | 1.80541400  | -2.22957700 |
| H | 0.98089400  | 1.63160900  | -3.25143000 |
| C | 0.15673500  | 1.68182500  | -1.24714700 |
| C | -0.46298700 | 0.27530500  | -1.21311500 |
| O | -1.44964800 | -0.00326900 | -1.93057700 |
| H | 0.54595500  | 1.94861500  | -0.26331700 |
| C | 3.72332700  | 0.57953700  | -1.85717000 |
| C | 2.31301700  | 0.72371600  | -1.83879200 |
| C | 1.84843200  | -0.47405300 | -1.33871100 |
| N | 2.93459200  | -1.26501900 | -1.09690500 |
| H | -0.65177500 | 2.37109200  | -1.50581900 |
| N | 4.08903300  | -0.61674700 | -1.41763100 |

|   |            |             |             |
|---|------------|-------------|-------------|
| C | 2.99415200 | -2.55846100 | -0.52753400 |
| C | 1.99692100 | -3.50113200 | -0.77300800 |
| C | 4.07893100 | -2.88356400 | 0.29109100  |
| C | 2.04601800 | -4.74044900 | -0.14010300 |
| H | 1.19170100 | -3.29706000 | -1.46601900 |
| C | 4.13086400 | -4.13190700 | 0.89974600  |
| H | 4.85900500 | -2.14639800 | 0.44194400  |
| C | 3.10644000 | -5.05882600 | 0.70339100  |
| H | 1.24831700 | -5.45204000 | -0.32732600 |
| H | 4.97327600 | -4.37844100 | 1.53804600  |
| H | 3.14578500 | -6.02666900 | 1.19200700  |
| N | 0.52261700 | -0.79615600 | -1.05782400 |
| H | 0.16274300 | -1.60463900 | -1.55528400 |
| C | 4.76372300 | 1.55702600  | -2.30908300 |
| H | 4.92387400 | 2.33811900  | -1.55957700 |
| H | 5.70753600 | 1.03517000  | -2.47734000 |
| H | 4.45954100 | 2.05578100  | -3.23290900 |

**PR**

|   |             |             |             |
|---|-------------|-------------|-------------|
| C | -1.47266600 | -2.20791000 | 2.92221500  |
| C | -0.64497500 | -1.13792000 | 2.59925200  |
| C | -0.41307300 | -0.11235300 | 3.52149100  |
| C | -1.02901000 | -0.17731900 | 4.77059000  |
| C | -1.86045500 | -1.24817900 | 5.09746500  |
| C | -2.08299700 | -2.26603500 | 4.17501000  |
| H | -1.63835600 | -2.99929400 | 2.19807700  |
| H | -0.15632800 | -1.10086700 | 1.62790800  |
| H | -0.85350600 | 0.61362900  | 5.49531000  |
| H | -2.32980600 | -1.28755400 | 6.07541600  |
| H | -2.72496300 | -3.10290900 | 4.43017600  |
| C | 0.47476300  | 1.06150500  | 3.15245700  |
| H | 0.66879800  | 1.63651900  | 4.06800700  |
| C | -0.25327800 | 1.98211600  | 2.14349700  |
| C | 0.60484300  | 3.04808700  | 1.47531100  |
| O | 0.20271300  | 4.16533300  | 1.21507700  |
| H | -0.64663300 | 1.35873500  | 1.32937600  |
| C | 2.70559400  | -0.40190200 | 2.73484800  |
| C | 1.78137500  | 0.65502500  | 2.53209200  |
| C | 2.37645300  | 1.43757400  | 1.57340100  |
| N | 3.55361500  | 0.86305700  | 1.22456900  |
| H | -1.09836400 | 2.49143400  | 2.60833700  |
| N | 3.76898000  | -0.26893400 | 1.95390100  |
| C | 4.52137000  | 1.31457400  | 0.29282100  |
| C | 4.11925000  | 1.89268300  | -0.91151400 |

|   |            |             |             |
|---|------------|-------------|-------------|
| C | 5.87398800 | 1.15534600  | 0.59278400  |
| C | 5.08647600 | 2.34189100  | -1.80719200 |
| H | 3.06468600 | 1.96282000  | -1.15777100 |
| C | 6.82778400 | 1.58947200  | -0.31996400 |
| H | 6.15453700 | 0.69043000  | 1.53069900  |
| C | 6.43935900 | 2.19208200  | -1.51610000 |
| H | 4.77535100 | 2.79305700  | -2.74350200 |
| H | 7.88089900 | 1.46417400  | -0.09109400 |
| H | 7.18839100 | 2.53721100  | -2.22064000 |
| N | 1.86903600 | 2.63913200  | 1.09817200  |
| H | 2.47159100 | 3.33027700  | 0.66766400  |
| C | 2.59516800 | -1.55917200 | 3.67588700  |
| H | 1.80478900 | -2.24682400 | 3.36140100  |
| H | 3.54297000 | -2.09869200 | 3.70800700  |
| H | 2.34474600 | -1.21809300 | 4.68423900  |

**PS**

|   |             |             |             |
|---|-------------|-------------|-------------|
| C | -4.67654100 | -3.76717000 | -0.36405300 |
| C | -3.95028500 | -2.66803200 | 0.08213500  |
| C | -2.89190600 | -2.83137200 | 0.98147700  |
| C | -2.57399300 | -4.11557600 | 1.42206000  |
| C | -3.29911000 | -5.21966300 | 0.97615200  |
| C | -4.35213100 | -5.04801600 | 0.08270000  |
| H | -5.49807600 | -3.62507200 | -1.05905800 |
| H | -4.21395200 | -1.66785100 | -0.25505900 |
| H | -1.75549400 | -4.25192700 | 2.12415300  |
| H | -3.04157000 | -6.21264900 | 1.33075700  |
| H | -4.92049900 | -5.90592600 | -0.26182600 |
| C | -2.08455200 | -1.63416700 | 1.44517900  |
| H | -1.44329200 | -1.96419700 | 2.27398500  |
| C | -1.17374500 | -1.12829100 | 0.30100400  |
| C | -0.48521100 | 0.20700200  | 0.54825900  |
| O | 0.64825300  | 0.45420200  | 0.18502800  |
| H | -1.79033800 | -0.99119500 | -0.59747000 |
| C | -4.14738600 | -0.32511200 | 2.59979800  |
| C | -2.92279000 | -0.47296000 | 1.90011000  |
| C | -2.47818200 | 0.81562400  | 1.73197500  |
| N | -3.39280700 | 1.65613700  | 2.27467000  |
| H | -0.39543700 | -1.85406300 | 0.06192200  |
| N | -4.42117400 | 0.95239500  | 2.82838100  |
| C | -3.35332400 | 3.06988600  | 2.36836300  |
| C | -2.86747400 | 3.82927100  | 1.30391400  |
| C | -3.81941200 | 3.68396100  | 3.53058400  |
| C | -2.82151700 | 5.21610200  | 1.42244300  |

|   |             |             |            |
|---|-------------|-------------|------------|
| H | -2.55626000 | 3.34386200  | 0.38445100 |
| C | -3.78639300 | 5.07004600  | 3.62645100 |
| H | -4.20211700 | 3.06677900  | 4.33496100 |
| C | -3.27963700 | 5.83937400  | 2.57971100 |
| H | -2.44288500 | 5.80840100  | 0.59618200 |
| H | -4.15030400 | 5.55055200  | 4.52861800 |
| H | -3.24871300 | 6.92029000  | 2.66417700 |
| N | -1.26671300 | 1.17108700  | 1.15433400 |
| H | -0.83168000 | 2.06361000  | 1.35469700 |
| C | -5.08234800 | -1.39673700 | 3.06373200 |
| H | -4.53448000 | -2.19872400 | 3.56578300 |
| H | -5.81202800 | -0.97484400 | 3.75656400 |
| H | -5.61482500 | -1.84745500 | 2.22098100 |
